# Supplementary material
Source: PubMed Central journal article supplement (PMC7788120)
Supplement: 13205_2020_2583_MOESM1_ESM.pdf [file 13205_2020_2583_MOESM1_ESM.pdf]

## S1: Details of Polyomaviridae genomes used in the study

| Serial No. | Genome     | Genome | Genome   | Family         | Genus             | Virus name(s)                                     | Host                                                 | Accession No. | Virus abbreviation   | Size (kbp) | GC%       |
|------------|------------|--------|----------|----------------|-------------------|---------------------------------------------------|------------------------------------------------------|---------------|----------------------|------------|-----------|
|            | Serial No. | Shape  |          |                |                   |                                                   |                                                      |               |                      |            |           |
| 1          | BM2        | dsDNA  | circular | Polyomaviridae | Alphapolyomavirus | Bat polyomavirus 5b2                              | Acerodon celebensis [TAX:58057]                      | AB972940      | BatPyV5b-2           | 5040       | 41.825397 |
| 2          | BM3        | dsDNA  | circular | Polyomaviridae | Alphapolyomavirus | Bat polyomavirus 3a-A1055                         | Artibeus planirostris [TAX:40230]                    | JQ958886      | BatPyV3a-A1055       | 5019       | 41.223351 |
| 3          | BM4        | dsDNA  | circular | Polyomaviridae | Alphapolyomavirus | Bat polyomavirus 4a                               | Artibeus planirostris [TAX:40230]                    | JQ958890      | BatPyV4a             | 5187       | 44.225949 |
| 4          | BM5        | dsDNA  | circular | Polyomaviridae | Alphapolyomavirus | Ateles paniscus polyomavirus 1                    | Ateles paniscus [TAX:9510]                           | NC_019853     | ApanPyV1             | 5273       | 44.35805  |
| 5          | BM6        | dsDNA  | circular | Polyomaviridae | Alphapolyomavirus | Cardioderma polyomavirus                          | Chiroptera [TAX:9397] ; Cardioderma cor [TAX:270764] | NC_020067     | CardiodermaPyV       | 5372       | 41.269546 |
| 6          | BM7        | dsDNA  | circular | Polyomaviridae | Alphapolyomavirus | Bat polyomavirus 4b                               | Carollia perspicillata [TAX:40233]                   | NC_028120     | BatPyV4b             | 5352       | 42.376682 |
| 7          | BM8        | dsDNA  | circular | Polyomaviridae | Alphapolyomavirus | Vervet monkey polyomavirus 1                      | Chlorocebus pygerythrus [TAX:60710]                  | NC_019844     | VmPyV1               | 5157       | 39.635447 |
| 8          | BM9        | dsDNA  | circular | Polyomaviridae | Alphapolyomavirus | Vervet monkey polyomavirus 3                      | Chlorocebus pygerythrus [TAX:60710]                  | NC_025898     | VmPyV3               | 5055       | 41.186944 |
| 9          | BM10       | dsDNA  | circular | Polyomaviridae | Alphapolyomavirus | Bat polyomavirus 5a                               | Dobsonia moluccensis [TAX:42147]                     | NC_026768     | BatPyV5a             | 5075       | 39.527094 |
| 10         | BM11       | dsDNA  | circular | Polyomaviridae | Alphapolyomavirus | Eidolon polyomavirus 1                            | Chiroptera ; Eidolon helvum [TAX:77214]              | NC_020068     | EidolonPyV           | 5294       | 42.595391 |
| 11         | BM12       | dsDNA  | linear   | Polyomaviridae | Alphapolyomavirus | Gorilla gorilla gorilla polyomavirus 1            | Gorilla gorilla gorilla [TAX:9595]                   | NC_025380     | GgorgPyV1            | 5300       | 42.169811 |
| 12         | BM13       | dsDNA  | circular | Polyomaviridae | Alphapolyomavirus | Human polyomavirus 12                             | Homo sapiens [TAX:9606]                              | NC_020890     |                      | 5033       | 39.598649 |
| 13         | BM14       | dsDNA  | circular | Polyomaviridae | Alphapolyomavirus | New Jersey polyomavirus                           | Homo sapiens [TAX:9606]                              | NC_024118     | NJPyV                | 5108       | 39.252153 |
| 14         | BM15       | dsDNA  | circular | Polyomaviridae | Alphapolyomavirus | Merkel cell polyomavirus                          | Homo sapiens [TAX:9606]                              | NC_010277     | MCPyV                | 5387       | 40.671988 |
| 15         | BM16       | dsDNA  | circular | Polyomaviridae | Alphapolyomavirus | Trichodysplasia spinulosa-associated polyomavirus | Homo sapiens [TAX:9606]                              | NC_014361     | TSPyV                | 5232       | 40.061162 |
| 16         | BM17       | dsDNA  | linear   | Polyomaviridae | Alphapolyomavirus | Human polyomavirus 9                              | Homo sapiens [TAX:9606]                              | NC_015150     | HPyV9                | 5026       | 39.156387 |
| 17         | BM18       | dsDNA  | circular | Polyomaviridae | Alphapolyomavirus | Macaca fascicularis polyomavirus 1                | Macaca fascicularis [TAX:9541]                       | NC_019851     | MfasPyV1             | 5087       | 38.549243 |
| 18         | BM19       | dsDNA  | circular | Polyomaviridae | Alphapolyomavirus | Hamster polyomavirus                              | Mesocricetus auratus [TAX:9541]                      | NC_001663     | HaPyV                | 5372       | 41.548771 |
| 19         | BM20       | dsDNA  | circular | Polyomaviridae | Alphapolyomavirus | Bat polyomavirus 3b                               | Molossus molossus [TAX:27622]                        | NC_028123     | BatPyV3b             | 4903       | 40.872935 |
| 20         | BM21       | dsDNA  | linear   | Polyomaviridae | Alphapolyomavirus | Mouse polyomavirus (NCBI- Murine polyomavirus )   | Mus ; Mus musculus                                   | NC_001515     | MPyV                 | 5307       | 47.164123 |
| 21         | BM22       | dsDNA  | circular | Polyomaviridae | Alphapolyomavirus | Otomops polyomavirus 1                            | Chiroptera ; Otomops martiensseni [TAX:258867]       | NC_020071     | OtomopsPyV1          | 5176       | 40.784389 |
| 22         | BM23       | dsDNA  | circular | Polyomaviridae | Alphapolyomavirus | Otomops polyomavirus 2                            | Otomops martiensseni [TAX:258867]                    | NC_020066     | OtomopsPyV2          | 4914       | 41.798942 |
| 23         | BM24       | dsDNA  | circular | Polyomaviridae | Alphapolyomavirus | Chimpanzee polyomavirus                           | Pan troglodytes verus [TAX:37012]                    | NC_014743     | ChPyV                | 5086       | 38.242234 |
| 24         | BM25       | dsDNA  | linear   | Polyomaviridae | Alphapolyomavirus | Pan troglodytes verus polyomavirus 1a             | Pan troglodytes verus [TAX:37012]                    | NC_025368     | PtrovPyV1a           | 5303       | 40.354516 |
| 25         | BM26       | dsDNA  | linear   | Polyomaviridae | Alphapolyomavirus | Pan troglodytes verus polyomavirus 2a             | Pan troglodytes verus [TAX:37012]                    | NC_025370     | PtrovPyV2a           | 5309       | 40.949331 |
| 26         | BM27       | dsDNA  | circular | Polyomaviridae | Alphapolyomavirus | Pan troglodytes verus polyomavirus 3              | Pan troglodytes verus [TAX:37012]                    | NC_019855     | PtrovPyV3            | 5333       | 40.296269 |
| 27         | BM28       | dsDNA  | circular | Polyomaviridae | Alphapolyomavirus | Pan troglodytes verus polyomavirus 4              | Pan troglodytes verus [TAX:37012]                    | NC_019856     | PtrovPyV4            | 5349       | 38.549262 |
| 28         | BM29       | dsDNA  | circular | Polyomaviridae | Alphapolyomavirus | Pan troglodytes verus polyomavirus 5              | Pan troglodytes verus [TAX:37012]                    | NC_019857     | PtrovPyV5            | 4994       | 39.207048 |
| 29         | BM30       | dsDNA  | circular | Polyomaviridae | Alphapolyomavirus | Pan troglodytes schweinfurthii polyomavirus 2     | Pan troglodytes schweinfurthii [TAX:37010]           | NC_019858     | PtrosPyV2            | 4970       | 39.114688 |
| 30         | BM31       | dsDNA  | circular | Polyomaviridae | Alphapolyomavirus | Yellow baboon polyomavirus 1                      | Papio cynocephalus [TAX:9556]                        | NC_025894     | YbPyV1               | 5064       | 39.830174 |
| 31         | BM32       | dsDNA  | circular | Polyomaviridae | Alphapolyomavirus | Piliocolobus badius polyomavirus 2                | Piliocolobus badius [TAX:164648]                     | KX509984      | PbadPyV2             | 5148       | 40.034965 |
| 32         | BM33       | dsDNA  | circular | Polyomaviridae | Alphapolyomavirus | Piliocolobus rufomitratus polyomavirus 1          | Piliocolobus rufomitratus [TAX:591934]               | NC_019850     | PrufPyV1             | 5140       | 39.708171 |
| 33         | BM34       | dsDNA  | circular | Polyomaviridae | Alphapolyomavirus | Sumatran orang-utan polyomavirus                  | Pongo abelii [TAX:9601]                              | NC_028127     | OraPyV-Sum           | 5358       | 38.652482 |
| 34         | BM35       | dsDNA  | circular | Polyomaviridae | Alphapolyomavirus | Bornean orang-utan polyomavirus                   | Pongo pygmaeus [TAX:9600]                            | NC_013439     | OraPyV-Bor           | 5168       | 40.228328 |
| 35         | BM36       | dsDNA  | circular | Polyomaviridae | Alphapolyomavirus | Raccoon polyomavirus                              | Procyon lotor [TAX:9654]                             | NC_023845     | RacPyV               | 5016       | 42.204944 |
| 36         | BM37       | dsDNA  | circular | Polyomaviridae | Alphapolyomavirus | Bat polyomavirus 5b1                              | Pteropus vampyrus                                    | NC_026767     | BatPyV5b-1           | 5047       | 41.7872   |
| 37         | BM38       | dsDNA  | circular | Polyomaviridae | Alphapolyomavirus | Rattus norvegicus polyomavirus 1                  | Rattus norvegicus [TAX:10116]                        | NC_027531     | RnorPyV1             | 5318       | 45.298985 |
| 38         | BM89       | dsDNA  | circular | Polyomaviridae | Alphapolyomavirus | Sorex araneus polyomavirus 1                      | Sorex araneus                                        | MF374997      | SaraPyV1             | 5095       | 39.627085 |
| 39         | BM90       | dsDNA  | circular | Polyomaviridae | Alphapolyomavirus | Sorex coronatus polyomavirus 1                    | Sorex coronatus                                      | MF374999      | SminPyV1             | 5090       | 41.159136 |
| 40         | BM91       | dsDNA  | circular | Polyomaviridae | Alphapolyomavirus | Sorex minutus polyomavirus 1                      | Sorex minutus                                        | MF401583      | ScorPyV1             | 5096       | 39.462323 |
| 41         | BM92       | dsDNA  | circular | Polyomaviridae | Alphapolyomavirus | Bat polyomavirus 3a-B0454                         | Sturnira lilium                                      | NC_038557     | BatPyV3a-B0454       | 5058       | 42.249901 |
| 42         | BM93       | dsDNA  | circular | Polyomaviridae | Alphapolyomavirus | Miniopterus schreibersii polyomavirus 1           | Miniopterus schreibersii                             | NC_034220     | MschPyV1             | 4752       | 43.58165  |
| 43         | BM94       | dsDNA  | circular | Polyomaviridae | Alphapolyomavirus | Miniopterus schreibersii polyomavirus 2           | Miniopterus schreibersii                             | NC_034221     | MschPyV2             | 4877       | 42.628665 |
| 44         | BM39       | dsDNA  | circular | Polyomaviridae | Betapolyomavirus  | Bat polyomavirus 6a                               | Acerodon celebensis                                  | NC_026762     | BatPyV6a             | 5019       | 40.745168 |
| 45         | BM40       | dsDNA  | circular | Polyomaviridae | Betapolyomavirus  | Bat polyomavirus 2c                               | Artibeus planirostris polyomavirus 1                 | NC_038558     | BatPyV2c             | 5371       | 39.489853 |
| 46         | BM41       | dsDNA  | circular | Polyomaviridae | Betapolyomavirus  | Cebus albifrons polyomavirus 1                    | Cebus albifrons                                      | NC_019854     | CalbPyV1             | 5013       | 37.921404 |
| 47         | BM42       | dsDNA  | circular | Polyomaviridae | Betapolyomavirus  | Cercopithecus erythrotis polyomavirus 1           | Cercopithecus erythrotis                             | NC_025892     | CeryPyV1             | 5189       | 41.318173 |
| 48         | BM43       | dsDNA  | circular | Polyomaviridae | Betapolyomavirus  | Vervet monkey polyomavirus 2                      | Chlorocebus pygerythrus                              | NC_025896     | VmPyV2               | 5167       | 41.571512 |
| 49         | BM44       | dsDNA  | circular | Polyomaviridae | Betapolyomavirus  | Bat polyomavirus 2a                               | Desmodus rotundus                                    | NC_028122     | BatPyV2a             | 5201       | 43.280138 |
| 50         | BM45       | dsDNA  | circular | Polyomaviridae | Betapolyomavirus  | Bat polyomavirus 6b                               | Dobsonia moluccensis                                 | NC_026770     | BatPyV6b             | 5039       | 39.690415 |
| 51         | BM46       | dsDNA  | circular | Polyomaviridae | Betapolyomavirus  | Bat polyomavirus 6c                               | Dobsonia moluccensis                                 | NC_026769     | BatPyV6c             | 5046       | 40.44788  |
| 52         | BM47       | dsDNA  | circular | Polyomaviridae | Betapolyomavirus  | Equine polyomavirus                               | Equus caballus                                       | NC_017982     | EPyV                 | 4987       | 44.636054 |
| 53         | BM48       | dsDNA  | circular | Polyomaviridae | Betapolyomavirus  | BK polyomavirus                                   | Homo sapiens                                         | NC_001538     | BK virus; BKV; BKPyV | 5153       | 39.530371 |
| 54         | BM49       | dsDNA  | circular | Polyomaviridae | Betapolyomavirus  | JC polyomavirus                                   | Homo sapiens                                         | NC_001699     | JC virus; JCV; JCPyV | 5130       | 40.448343 |
| 55         | BM50       | dsDNA  | circular | Polyomaviridae | Betapolyomavirus  | KI polyomavirus                                   | Homo sapiens                                         | NC_009238     | KIPyV                | 5040       | 39.365079 |
| 56         | BM51       | dsDNA  | circular | Polyomaviridae | Betapolyomavirus  | WU polyomavirus                                   | Homo sapiens                                         | NC_009539     | WU virus; WUPyV      | 5229       | 39.166189 |
| 57         | BM52       | dsDNA  | circular | Polyomaviridae | Betapolyomavirus  | Weddell seal polyomavirus                         | Leptonychotes weddellii                              | NC_032120     | WsPyV                | 5186       | 42.229078 |
| 58         | BM53       | dsDNA  | circular | Polyomaviridae | Betapolyomavirus  | African elephant polyomavirus 1                   | Loxodonta africana                                   | NC_022519     | AelPyV1              | 5722       | 42.922055 |
| 59         | BM54       | dsDNA  | circular | Polyomaviridae | Betapolyomavirus  | Simian virus 40                                   | Macaca mulatta                                       | NC_001669     | SV40                 | 5243       | 40.797253 |
| 60         | BM55       | dsDNA  | circular | Polyomaviridae | Betapolyomavirus  | Mastomys polyomavirus                             | Mastomys natalensis                                  | NC_025895     | MasPyV               | 4899       | 39.946928 |
| 61         | BM56       | dsDNA  | circular | Polyomaviridae | Betapolyomavirus  | Meles meles polyomavirus 1                        | Meles meles                                          | NC_026473     | MmelPyV1             | 5187       | 42.818585 |
| 62         | BM57       | dsDNA  | circular | Polyomaviridae | Betapolyomavirus  | Microtus arvalis polyomavirus 1                   | Microtus arvalis                                     | NC_028119     | CVPyV                | 5024       | 42.257166 |
| 63         | BM58       | dsDNA  | circular | Polyomaviridae | Betapolyomavirus  | Miniopterus polyomavirus                          | Miniopterus africanus                                | NC_020069     | MiniopterusPyV       | 5213       | 42.451563 |
| 64         | BM59       | dsDNA  | circular | Polyomaviridae | Betapolyomavirus  | Mouse pneumotropic virus                          | Mus musculus                                         | KT987216      | MPTV                 | 5005       | 40.27972  |
| 65         | BM60       | dsDNA  | circular | Polyomaviridae | Betapolyomavirus  | Myodes glareolus polyomavirus 1                   | Myodes glareolus                                     | NC_028117     | BVPyV                | 5032       | 41.713037 |
| 66         | BM61       | dsDNA  | circular | Polyomaviridae | Betapolyomavirus  | Myotis polyomavirus                               | Myotis lucifugus                                     | NC_011310     | MyPyV                | 5081       | 41.72407  |

| Serial No. | Genome Serial No. | Genome | Genome Shape | Family         | Genus              | Virus name(s)                            | Host                                   | Accession No. | Virus abbreviation | Size (kbp) | GC%       |
|------------|-------------------|--------|--------------|----------------|--------------------|------------------------------------------|----------------------------------------|---------------|--------------------|------------|-----------|
| 67         | BM62              | dsDNA  | circular     | Polyomaviridae | Betapolyomavirus   | Pan troglodytes verus polyomavirus 8     | Pan troglodytes verus                  | NC_028635     | PtrovPyV8          | 5163       | 38.136742 |
| 68         | BM64              | dsDNA  | circular     | Polyomaviridae | Betapolyomavirus   | Pteronotus polyomavirus                  | Pteronotus davyi                       | NC_020070     | PteronotusPyV      | 5136       | 41.530374 |
| 69         | BM65              | dsDNA  | circular     | Polyomaviridae | Betapolyomavirus   | Bat polyomavirus 2b                      | Pteronotus parnellii                   | NC_028121     | BatPyV2b           | 5041       | 38.643126 |
| 70         | BM66              | dsDNA  | circular     | Polyomaviridae | Betapolyomavirus   | Rat polyomavirus 2                       | Rattus norvegicus                      | KX574453      | RatPyV2            | 5104       | 43.691223 |
| 71         | BM67              | dsDNA  | circular     | Polyomaviridae | Betapolyomavirus   | Squirrel monkey polyomavirus             | Saimiri boliviensis                    | NC_009951     | SquiPyV            | 5075       | 37.871921 |
| 72         | BM68              | dsDNA  | circular     | Polyomaviridae | Betapolyomavirus   | Saimiri sciureus polyomavirus 1          | Saimiri sciureus                       | NC_038559     | SsciPyV1           | 5067       | 37.635682 |
| 73         | BM69              | dsDNA  | circular     | Polyomaviridae | Betapolyomavirus   | Alpaca polyomavirus                      | Vicugna pacos                          | NC_034251     | AlPyV              | 5052       | 37.747427 |
| 74         | BM70              | dsDNA  | linear       | Polyomaviridae | Betapolyomavirus   | California sea lion polyomavirus 1       | Zalophus californianus                 | NC_013796     | SLPyV              | 5112       | 42.683881 |
| 75         | BM95              | dsDNA  | circular     | Polyomaviridae | Betapolyomavirus   | Canis familiaris polyomavirus 1          | Canis familiaris                       | NC_034456     | CfamPyV1           | 5070       | 34.69428  |
| 76         | BM96              | dsDNA  | circular     | Polyomaviridae | Betapolyomavirus   | Rousettus aegyptiacus polyomavirus 1     | Rousettus aegyptiacus                  | NC_034219     | RaegPyV1           | 5014       | 42.89988  |
| 77         | BM71              | dsDNA  | circular     | Polyomaviridae | Deltapolyomavirus  | Human polyomavirus 6                     | Homo sapiens                           | NC_014406     | HPyV6              | 4926       | 42.651238 |
| 78         | BM72              | dsDNA  | circular     | Polyomaviridae | Deltapolyomavirus  | Human polyomavirus 7                     | Homo sapiens                           | NC_014407     | HPyV7              | 4952       | 42.891761 |
| 79         | BM73              | dsDNA  | circular     | Polyomaviridae | Deltapolyomavirus  | MW polyomavirus                          | Homo sapiens                           | NC_018102     | MWPyV              | 4927       | 36.898721 |
| 80         | BM74              | dsDNA  | circular     | Polyomaviridae | Deltapolyomavirus  | STL polyomavirus                         | Homo sapiens                           | NC_020106     | STLPyV             | 4776       | 36.620603 |
| 81         | BM75              | dsDNA  | circular     | Polyomaviridae | Gammapolyomavirus  | Goose hemorrhagic polyomavirus           | Anser sp.                              | NC_004800     | GHPV               | 5256       | 48.059361 |
| 82         | BM76              | dsDNA  | linear       | Polyomaviridae | Gammapolyomavirus  | Budgerigar fledgling disease virus       | Gallus gallus, Melopsittacus undulatus | NC_004764     | BFDV               | 4981       | 48.544469 |
| 83         | BM77              | dsDNA  | circular     | Polyomaviridae | Gammapolyomavirus  | Crow polyomavirus                        | Eurasian jackdaw                       | NC_007922     | CpyV               | 5079       | 45.73735  |
| 84         | BM78              | dsDNA  | circular     | Polyomaviridae | Gammapolyomavirus  | Butcherbird polyomavirus                 | Cracticus torquatus                    | NC_023008     | Butcherbird PyV    | 5084       | 45.653029 |
| 85         | BM79              | dsDNA  | circular     | Polyomaviridae | Gammapolyomavirus  | Erythrura gouldiae polyomavirus 1        | Erythrura gouldiae                     | NC_039052     | EgouPyV1           | 5172       | 44.586234 |
| 86         | BM80              | dsDNA  | circular     | Polyomaviridae | Gammapolyomavirus  | Hungarian finch polyomavirus             | Lonchura maja                          | NC_039053     | HunFPyV            | 5284       | 51.116578 |
| 87         | BM81              | dsDNA  | circular     | Polyomaviridae | Gammapolyomavirus  | Adelie penguin polyomavirus              | Pygoscelis adeliae                     | NC_026141     | ADPyV              | 4988       | 52.34563  |
| 88         | BM82              | dsDNA  | circular     | Polyomaviridae | Gammapolyomavirus  | Finch polyomavirus                       | Pyrrhula pyrrhula griseiventris        | NC_007923     | FpyV               | 5278       | 51.231527 |
| 89         | BM83              | dsDNA  | linear       | Polyomaviridae | Gammapolyomavirus  | Canary polyomavirus                      | Serinus canaria                        | NC_017085     | CaPyV              | 5421       | 49.105331 |
| 90         | BM84              | dsDNA  | circular     | Polyomaviridae | Unassigned species | Bovine polyomavirus                      | Bos taurus                             | NC_001442     | BPvV               | 4697       | 41.38812  |
| 91         | BM85              | dsDNA  | circular     | Polyomaviridae | Unassigned species | Black sea bass-associated polyomavirus 1 | Centropristis striata                  | NC_025790     | BassPyV1           | 7369       | 48.527616 |
| 92         | BM86              | dsDNA  | circular     | Polyomaviridae | Unassigned species | Dolphin polyomavirus 1                   | Delphinus delphis                      | NC_025899     | DPyV               | 5159       | 36.421787 |
| 93         | BM87              | dsDNA  | circular     | Polyomaviridae | Unassigned species | Giant guitarfish polyomavirus            | Rhynchobatus djiddensis                | NC_026244     | GfPyV1             | 3962       | 42.983342 |
| 94         | BM88              | dsDNA  | circular     | Polyomaviridae | Unassigned species | Sharp-spined notothenia polyomavirus     | Trematomus pennellii                   | NC_026944     | SspPyV             | 6219       | 46.08458  |
| 95         | BM97              | dsDNA  | linear       | Polyomaviridae | Unassigned species | Giant panda polyomavirus                 | Ailuropoda melanoleuca                 | NC_035181     | AmelPyV1           | 5144       | 41.835148 |
| 96         | BM98              | dsDNA  | circular     | Polyomaviridae | Unassigned species | Raccoon-associated polyomavirus 2        | Procyon lotor                          | NC_034378     | PlotPyV1           | 5225       | 43.272727 |
| 97         | BM99              | dsDNA  | linear       | Polyomaviridae | Unassigned species | Sparus aurata polyomavirus 1             | Sparus aurata                          | NC_030838     | SaurPyV1           | 7299       | 52.116728 |
| 98         | BM100             | dsDNA  | circular     | Polyomaviridae | Unassigned species | Emerald notothen polyomavirus 1          | Trematomus bernacchii                  | NC_040638     | TberPyV1           | 5541       | 45.154304 |

**S2 : SSRs and cSSRs extracted from studied Polyomaviridae genomes.**

| Serial No. | Genome Serial No. | SSR | Size (kbp) | sRA       | sRD    | cSSR10 | cRA         | cRD         | cSSR%       | Mono Rep Incidence | Mono Tract Size | Di Rep Incidence |
|------------|-------------------|-----|------------|-----------|--------|--------|-------------|-------------|-------------|--------------------|-----------------|------------------|
| 1          | BM2               | 30  | 5040       | 5.9523810 | 42.262 | 2      | 0.3968254   | 6.944444444 | 13.33333333 | 12                 | 84              | 13               |
| 2          | BM3               | 31  | 5019       | 6.1765292 | 51.205 | 2      | 0.39848575  | 6.973500697 | 12.90322581 | 18                 | 116             | 5                |
| 3          | BM4               | 37  | 5187       | 7.1332177 | 52.053 | 4      | 0.77115867  | 12.33853865 | 21.62162162 | 14                 | 96              | 18               |
| 4          | BM5               | 24  | 5273       | 4.5514887 | 32.429 | 1      | 0.18964536  | 3.034325811 | 8.333333333 | 11                 | 82              | 12               |
| 5          | BM6               | 30  | 5372       | 5.5845123 | 51.005 | 2      | 0.37230082  | 8.00446761  | 13.33333333 | 13                 | 97              | 9                |
| 6          | BM7               | 35  | 5352       | 6.5396114 | 60.538 | 3      | 0.56053812  | 19.99252616 | 22.85714286 | 15                 | 101             | 7                |
| 7          | BM8               | 30  | 5157       | 5.8173357 | 48.478 | 3      | 0.58173357  | 14.34942796 | 20          | 13                 | 88              | 10               |
| 8          | BM9               | 31  | 5055       | 6.1325420 | 49.852 | 4      | 0.79129575  | 15.82591494 | 25.80645161 | 16                 | 107             | 7                |
| 9          | BM10              | 26  | 5075       | 5.1231527 | 37.241 | 2      | 0.39408867  | 8.472906404 | 15.38461538 | 11                 | 72              | 11               |
| 10         | BM11              | 36  | 5294       | 6.8001511 | 47.979 | 1      | 0.18889309  | 4.911220249 | 5.555555556 | 20                 | 128             | 9                |
| 11         | BM12              | 36  | 5300       | 6.7924528 | 51.509 | 1      | 0.18867925  | 3.962264151 | 5.555555556 | 19                 | 129             | 10               |
| 12         | BM13              | 32  | 5033       | 6.3580370 | 52.851 | 2      | 0.39737731  | 9.934432744 | 12.5        | 18                 | 141             | 7                |
| 13         | BM14              | 35  | 5108       | 6.8519969 | 51.488 | 0      | 0           | 0           | 0           | 14                 | 93              | 13               |
| 14         | BM15              | 25  | 5387       | 4.6408019 | 32.671 | 2      | 0.37126415  | 7.796547243 | 16          | 12                 | 83              | 9                |
| 15         | BM16              | 30  | 5232       | 5.7339450 | 44.151 | 1      | 0.1911315   | 3.822629969 | 6.666666667 | 12                 | 80              | 12               |
| 16         | BM17              | 35  | 5026       | 6.9637883 | 54.318 | 2      | 0.39793076  | 7.560684441 | 11.42857143 | 22                 | 148             | 5                |
| 17         | BM18              | 35  | 5087       | 6.8802831 | 59.760 | 3      | 0.58973855  | 17.69215648 | 17.14285714 | 23                 | 160             | 4                |
| 18         | BM19              | 24  | 5372       | 4.4676098 | 32.762 | 1      | 0.18615041  | 5.212211467 | 12.5        | 8                  | 56              | 11               |
| 19         | BM20              | 29  | 4903       | 5.9147461 | 43.647 | 3      | 0.61187028  | 11.82949215 | 20.68965517 | 7                  | 45              | 14               |
| 20         | BM21              | 18  | 5307       | 3.3917468 | 27.699 | 0      | 0           | 0           | 0           | 7                  | 49              | 7                |
| 21         | BM22              | 37  | 5176       | 7.1483771 | 55.062 | 2      | 0.38639876  | 8.307573416 | 10.81081081 | 18                 | 131             | 11               |
| 22         | BM23              | 26  | 4914       | 5.2910053 | 39.683 | 2      | 0.40700041  | 7.733007733 | 15.38461538 | 12                 | 79              | 8                |
| 23         | BM24              | 34  | 5086       | 6.6850177 | 53.677 | 0      | 0           | 0           | 0           | 10                 | 62              | 13               |
| 24         | BM25              | 37  | 5303       | 6.9771827 | 52.989 | 1      | 0.18857251  | 3.960022629 | 5.405405405 | 19                 | 131             | 11               |
| 25         | BM26              | 32  | 5309       | 6.0275005 | 42.569 | 2      | 0.37671878  | 5.839141081 | 12.5        | 18                 | 120             | 10               |
| 26         | BM27              | 39  | 5333       | 7.3129571 | 56.629 | 2      | 0.37502344  | 8.438027377 | 12.82051282 | 18                 | 111             | 11               |
| 27         | BM28              | 34  | 5349       | 6.3563283 | 47.859 | 3      | 0.5608525   | 12.8996074  | 20.58823529 | 23                 | 154             | 6                |
| 28         | BM29              | 36  | 4994       | 7.2086504 | 57.269 | 1      | 0.20024029  | 4.004805767 | 5.555555556 | 20                 | 140             | 8                |
| 29         | BM30              | 32  | 4970       | 6.4386318 | 50.704 | 2      | 0.40241449  | 7.847082495 | 12.5        | 17                 | 124             | 10               |
| 30         | BM31              | 31  | 5064       | 6.1216430 | 45.616 | 1      | 0.19747235  | 7.701421801 | 12.90322581 | 16                 | 107             | 8                |
| 31         | BM32              | 26  | 5148       | 5.0505051 | 35.742 | 1      | 0.19425019  | 5.439005439 | 7.692307692 | 11                 | 77              | 12               |
| 32         | BM33              | 29  | 5140       | 5.6420234 | 33.852 | 3      | 0.58365759  | 11.47859922 | 20.68965517 | 14                 | 84              | 10               |
| 33         | BM34              | 36  | 5358       | 6.7189250 | 53.751 | 2      | 0.37327361  | 7.278835386 | 11.11111111 | 16                 | 104             | 9                |
| 34         | BM35              | 22  | 5168       | 4.2569659 | 31.734 | 1      | 0.19349845  | 5.224458204 | 9.090909091 | 11                 | 70              | 7                |
| 35         | BM36              | 32  | 5016       | 6.3795853 | 47.448 | 2      | 0.39872408  | 7.376395534 | 12.5        | 14                 | 97              | 14               |
| 36         | BM37              | 31  | 5047       | 6.1422627 | 48.346 | 3      | 0.59441252  | 9.708737864 | 19.35483871 | 9                  | 67              | 14               |
| 37         | BM38              | 22  | 5318       | 4.1368936 | 28.958 | 1      | 0.18804062  | 4.136893569 | 9.090909091 | 6                  | 37              | 12               |
| 38         | BM89              | 34  | 5095       | 6.6732090 | 57.311 | 2      | 0.392541708 | 10.2060844  | 11.76470588 | 19                 | 152             | 7                |
| 39         | BM90              | 32  | 5090       | 6.2868369 | 51.081 | 2      | 0.392927308 | 11.19842829 | 15.625      | 18                 | 138             | 7                |

**S2 : SSRs and cSSRs extracted from studied Polyomaviridae genomes.**

| Serial No. | Genome Serial No. | SSR | Size (kbp) | sRA       | sRD    | cSSR10 | cRA         | cRD         | cSSR%       | Mono Rep Incidence | Mono Tract Size | Di Rep Incidence |
|------------|-------------------|-----|------------|-----------|--------|--------|-------------|-------------|-------------|--------------------|-----------------|------------------|
| 40         | BM91              | 29  | 5096       | 5.6907378 | 46.507 | 3      | 0.588697017 | 12.16640502 | 20.68965517 | 13                 | 100             | 9                |
| 41         | BM92              | 26  | 5058       | 5.1403717 | 41.716 | 2      | 0.395413207 | 9.094503756 | 19.23076923 | 12                 | 78              | 4                |
| 42         | BM93              | 23  | 4752       | 4.8400673 | 38.721 | 2      | 0.420875421 | 6.944444444 | 17.39130435 | 8                  | 55              | 8                |
| 43         | BM94              | 26  | 4877       | 5.3311462 | 45.315 | 1      | 0.205044084 | 3.280705352 | 7.692307692 | 7                  | 51              | 9                |
| 44         | BM39              | 40  | 5019       | 7.9697151 | 60.171 | 5      | 0.996214385 | 19.92428771 | 25          | 22                 | 142             | 10               |
| 45         | BM40              | 45  | 5371       | 8.3783281 | 69.633 | 4      | 0.744740272 | 17.68758146 | 20          | 17                 | 113             | 14               |
| 46         | BM41              | 39  | 5013       | 7.7797726 | 60.044 | 4      | 0.797925394 | 17.15539597 | 23.07692308 | 17                 | 119             | 15               |
| 47         | BM42              | 34  | 5189       | 6.5523222 | 47.986 | 4      | 0.770861438 | 15.22451339 | 26.47058824 | 20                 | 130             | 10               |
| 48         | BM43              | 30  | 5167       | 5.8060770 | 44.513 | 3      | 0.580607703 | 11.41861815 | 23.33333333 | 14                 | 93              | 9                |
| 49         | BM44              | 28  | 5201       | 5.3835801 | 40.185 | 2      | 0.384541434 | 6.921745818 | 14.28571429 | 19                 | 123             | 4                |
| 50         | BM45              | 31  | 5039       | 6.1520143 | 49.613 | 3      | 0.595356221 | 11.90712443 | 19.35483871 | 14                 | 95              | 10               |
| 51         | BM46              | 37  | 5046       | 7.3325406 | 57.273 | 3      | 0.594530321 | 13.27784384 | 16.21621622 | 16                 | 107             | 14               |
| 52         | BM47              | 35  | 4987       | 7.0182474 | 56.948 | 2      | 0.401042711 | 9.42450371  | 14.28571429 | 11                 | 70              | 14               |
| 53         | BM48              | 33  | 5153       | 6.4040365 | 48.515 | 2      | 0.388123423 | 8.3446536   | 12.12121212 | 15                 | 106             | 12               |
| 54         | BM49              | 39  | 5130       | 7.6023392 | 54.971 | 5      | 0.974658869 | 16.37426901 | 25.64102564 | 26                 | 179             | 9                |
| 55         | BM50              | 38  | 5040       | 7.5396825 | 53.571 | 4      | 0.793650794 | 16.26984127 | 21.05263158 | 15                 | 99              | 16               |
| 56         | BM51              | 26  | 5229       | 4.9722700 | 39.204 | 1      | 0.191241155 | 2.677376171 | 7.692307692 | 13                 | 94              | 7                |
| 57         | BM52              | 34  | 5186       | 6.5561126 | 48.785 | 4      | 0.771307366 | 16.77593521 | 26.47058824 | 15                 | 94              | 11               |
| 58         | BM53              | 32  | 5722       | 5.5924502 | 39.497 | 5      | 0.873820343 | 15.20447396 | 31.25       | 18                 | 125             | 12               |
| 59         | BM54              | 38  | 5243       | 7.2477589 | 57.410 | 1      | 0.190730498 | 3.623879458 | 5.263157895 | 21                 | 133             | 6                |
| 60         | BM55              | 27  | 4899       | 5.5113288 | 40.212 | 1      | 0.20412329  | 4.2865891   | 7.407407407 | 12                 | 80              | 10               |
| 61         | BM56              | 22  | 5187       | 4.2413727 | 31.425 | 1      | 0.192789666 | 2.699055331 | 9.090909091 | 10                 | 67              | 9                |
| 62         | BM57              | 25  | 5024       | 4.9761146 | 36.425 | 2      | 0.398089172 | 7.563694268 | 16          | 7                  | 52              | 13               |
| 63         | BM58              | 31  | 5213       | 5.9466718 | 46.231 | 1      | 0.191828122 | 6.905812392 | 6.451612903 | 16                 | 103             | 10               |
| 64         | BM59              | 19  | 5005       | 3.7962038 | 27.972 | 0      | 0           | 0           | 0           | 7                  | 49              | 8                |
| 65         | BM60              | 24  | 5032       | 4.7694754 | 37.957 | 1      | 0.19872814  | 4.570747218 | 8.333333333 | 10                 | 71              | 9                |
| 66         | BM61              | 28  | 5081       | 5.5107262 | 42.511 | 3      | 0.590434954 | 16.1385554  | 25          | 13                 | 90              | 7                |
| 67         | BM62              | 32  | 5163       | 6.1979469 | 45.322 | 2      | 0.387371683 | 6.004261089 | 12.5        | 19                 | 127             | 9                |
| 68         | BM64              | 35  | 5136       | 6.8146417 | 53.738 | 3      | 0.58411215  | 13.04517134 | 17.14285714 | 14                 | 90              | 13               |
| 69         | BM65              | 47  | 5041       | 9.3235469 | 80.341 | 4      | 0.793493354 | 17.06010712 | 17.0212766  | 19                 | 126             | 12               |
| 70         | BM66              | 25  | 5104       | 4.8981191 | 37.618 | 2      | 0.39184953  | 7.053291536 | 16          | 13                 | 92              | 9                |
| 71         | BM67              | 40  | 5075       | 7.8817734 | 67.192 | 5      | 0.985221675 | 24.03940887 | 25          | 15                 | 109             | 12               |
| 72         | BM68              | 46  | 5067       | 9.0783501 | 76.771 | 3      | 0.592066311 | 15.98579041 | 13.04347826 | 16                 | 110             | 14               |
| 73         | BM69              | 37  | 5052       | 7.3238321 | 55.226 | 3      | 0.593824228 | 10.4908947  | 16.21621622 | 20                 | 133             | 7                |
| 74         | BM70              | 32  | 5112       | 6.2597809 | 44.992 | 5      | 0.978090767 | 17.6056338  | 31.25       | 14                 | 87              | 12               |
| 75         | BM95              | 37  | 5070       | 7.2978304 | 68.442 | 6      | 1.183431953 | 33.92504931 | 37.83783784 | 21                 | 143             | 10               |
| 76         | BM96              | 24  | 5014       | 4.7865975 | 31.711 | 2      | 0.398883127 | 7.578779418 | 16.66666667 | 15                 | 97              | 8                |
| 77         | BM71              | 25  | 4926       | 5.0751117 | 38.774 | 1      | 0.203004466 | 5.075111652 | 8           | 9                  | 58              | 10               |
| 78         | BM72              | 31  | 4952       | 6.2600969 | 46.850 | 1      | 0.201938611 | 4.038772213 | 6.451612903 | 11                 | 71              | 13               |

**S2 : SSRs and cSSRs extracted form studied Polyomaviridae genomes.**

| Serial No. | Genome Serial No. | SSR | Size (kbp) | sRA       | sRD    | cSSR10 | cRA         | cRD         | cSSR%       | Mono Rep Incidence | Mono Tract Size | Di Rep Incidence |
|------------|-------------------|-----|------------|-----------|--------|--------|-------------|-------------|-------------|--------------------|-----------------|------------------|
| 79         | BM73              | 26  | 4927       | 5.2770449 | 38.157 | 3      | 0.608889791 | 8.32149381  | 23.07692308 | 16                 | 104             | 7                |
| 80         | BM74              | 26  | 4776       | 5.4438861 | 40.829 | 1      | 0.209380235 | 6.072026801 | 11.53846154 | 9                  | 59              | 10               |
| 81         | BM75              | 21  | 5256       | 3.9954338 | 33.486 | 1      | 0.190258752 | 3.234398782 | 9.523809524 | 7                  | 44              | 8                |
| 82         | BM76              | 21  | 4981       | 4.2160209 | 27.705 | 0      | 0           | 0           | 0           | 9                  | 57              | 10               |
| 83         | BM77              | 24  | 5079       | 4.7253396 | 34.652 | 1      | 0.196889151 | 2.559558968 | 8.333333333 | 11                 | 69              | 8                |
| 84         | BM78              | 21  | 5084       | 4.1306058 | 33.045 | 3      | 0.590086546 | 10.62155783 | 28.57142857 | 7                  | 46              | 7                |
| 85         | BM79              | 33  | 5172       | 6.3805104 | 49.884 | 2      | 0.386697602 | 5.027068832 | 12.12121212 | 9                  | 55              | 15               |
| 86         | BM80              | 18  | 5284       | 3.4065102 | 26.495 | 1      | 0.189250568 | 3.785011355 | 11.11111111 | 5                  | 31              | 6                |
| 87         | BM81              | 20  | 4988       | 4.0096231 | 31.676 | 2      | 0.40096231  | 7.217321572 | 20          | 8                  | 51              | 7                |
| 88         | BM82              | 21  | 5278       | 3.9787798 | 28.420 | 0      | 0           | 0           | 0           | 6                  | 36              | 10               |
| 89         | BM83              | 29  | 5421       | 5.3495665 | 39.661 | 2      | 0.368935621 | 6.456373363 | 13.79310345 | 13                 | 86              | 11               |
| 90         | BM84              | 31  | 4697       | 6.5999574 | 45.135 | 7      | 1.490312966 | 25.97402597 | 48.38709677 | 12                 | 77              | 15               |
| 91         | BM85              | 56  | 7369       | 7.5994029 | 66.495 | 7      | 0.949925363 | 20.89835799 | 25          | 34                 | 278             | 14               |
| 92         | BM86              | 27  | 5159       | 5.2335724 | 39.349 | 3      | 0.581508044 | 9.691800737 | 22.22222222 | 9                  | 60              | 11               |
| 93         | BM87              | 21  | 3962       | 5.3003534 | 43.665 | 2      | 0.504795558 | 15.90106007 | 23.80952381 | 6                  | 39              | 8                |
| 94         | BM88              | 39  | 6219       | 6.2711047 | 54.993 | 1      | 0.160797556 | 3.537546229 | 5.128205128 | 19                 | 173             | 13               |
| 95         | BM97              | 38  | 5144       | 7.3872473 | 55.404 | 3      | 0.583203733 | 15.35769829 | 21.05263158 | 15                 | 103             | 15               |
| 96         | BM98              | 31  | 5225       | 5.9330144 | 48.612 | 3      | 0.574162679 | 10.90909091 | 19.35483871 | 12                 | 84              | 11               |
| 97         | BM99              | 45  | 7299       | 6.1652281 | 47.541 | 0      | 0           | 0           | 20          | 19                 | 131             | 15               |
| 98         | BM100             | 27  | 5541       | 4.8727666 | 37.538 | 3      | 0.541418517 | 15.52066414 | 25.92592593 | 9                  | 68              | 13               |

| and cSSRs extracted |               |                   |                |                     |                  |                     |                  |                    |
|---------------------|---------------|-------------------|----------------|---------------------|------------------|---------------------|------------------|--------------------|
| Genome Serial No.   | Di Tract Size | Tri Rep Incidence | Tri Tract Size | Tetra Rep Incidence | Tetra Tract Size | Penta Rep Incidence | Penta Tract Size | Hexa Rep Incidence |
| BM2                 | 78            | 5                 | 51             | 0                   | 0                | 0                   | 0                | 0                  |
| BM3                 | 32            | 4                 | 44             | 0                   | 0                | 2                   | 29               | 2                  |
| BM4                 | 113           | 5                 | 61             | 0                   | 0                | 0                   | 0                | 0                  |
| BM5                 | 78            | 1                 | 11             | 0                   | 0                | 0                   | 0                | 0                  |
| BM6                 | 58            | 7                 | 95             | 0                   | 0                | 0                   | 0                | 1                  |
| BM7                 | 44            | 10                | 134            | 1                   | 12               | 1                   | 14               | 1                  |
| BM8                 | 64            | 5                 | 67             | 1                   | 12               | 0                   | 0                | 1                  |
| BM9                 | 48            | 6                 | 73             | 2                   | 24               | 0                   | 0                | 0                  |
| BM10                | 71            | 4                 | 46             | 0                   | 0                | 0                   | 0                | 0                  |
| BM11                | 56            | 7                 | 70             | 0                   | 0                | 0                   | 0                | 0                  |
| BM12                | 60            | 5                 | 55             | 1                   | 11               | 0                   | 0                | 1                  |
| BM13                | 42            | 5                 | 52             | 1                   | 11               | 1                   | 20               | 0                  |
| BM14                | 82            | 5                 | 52             | 2                   | 22               | 1                   | 14               | 0                  |
| BM15                | 56            | 4                 | 37             | 0                   | 0                | 0                   | 0                | 0                  |
| BM16                | 84            | 5                 | 55             | 1                   | 12               | 0                   | 0                | 0                  |
| BM17                | 32            | 7                 | 79             | 1                   | 14               | 0                   | 0                | 0                  |
| BM18                | 26            | 5                 | 62             | 1                   | 13               | 0                   | 0                | 2                  |
| BM19                | 66            | 4                 | 43             | 1                   | 11               | 0                   | 0                | 0                  |
| BM20                | 84            | 6                 | 61             | 2                   | 24               | 0                   | 0                | 0                  |
| BM21                | 44            | 3                 | 43             | 1                   | 11               | 0                   | 0                | 0                  |
| BM22                | 66            | 7                 | 76             | 1                   | 12               | 0                   | 0                | 0                  |
| BM23                | 55            | 5                 | 50             | 1                   | 11               | 0                   | 0                | 0                  |
| BM24                | 87            | 7                 | 77             | 4                   | 47               | 0                   | 0                | 0                  |
| BM25                | 71            | 5                 | 56             | 2                   | 23               | 0                   | 0                | 0                  |
| BM26                | 60            | 3                 | 35             | 1                   | 11               | 0                   | 0                | 0                  |
| BM27                | 75            | 9                 | 105            | 1                   | 11               | 0                   | 0                | 0                  |
| BM28                | 41            | 4                 | 48             | 1                   | 13               | 0                   | 0                | 0                  |
| BM29                | 53            | 7                 | 74             | 0                   | 0                | 0                   | 0                | 1                  |
| BM30                | 67            | 4                 | 47             | 0                   | 0                | 1                   | 14               | 0                  |
| BM31                | 48            | 6                 | 55             | 1                   | 12               | 0                   | 0                | 0                  |
| BM32                | 72            | 3                 | 35             | 0                   | 0                | 0                   | 0                | 0                  |
| BM33                | 60            | 5                 | 30             | 0                   | 0                | 0                   | 0                | 0                  |
| BM34                | 59            | 8                 | 91             | 3                   | 34               | 0                   | 0                | 0                  |
| BM35                | 42            | 3                 | 40             | 1                   | 12               | 0                   | 0                | 0                  |
| BM36                | 84            | 3                 | 33             | 0                   | 0                | 0                   | 0                | 1                  |
| BM37                | 91            | 7                 | 73             | 0                   | 0                | 0                   | 0                | 1                  |
| BM38                | 76            | 3                 | 29             | 0                   | 0                | 0                   | 0                | 1                  |
| BM89                | 42            | 5                 | 52             | 1                   | 11               | 2                   | 35               | 0                  |
| BM90                | 42            | 7                 | 80             | 0                   | 0                | 0                   | 0                | 0                  |

| and cSSRs extracted |               |                   |                |                     |                  |                     |                  |                    |
|---------------------|---------------|-------------------|----------------|---------------------|------------------|---------------------|------------------|--------------------|
| Genome Serial No.   | Di Tract Size | Tri Rep Incidence | Tri Tract Size | Tetra Rep Incidence | Tetra Tract Size | Penta Rep Incidence | Penta Tract Size | Hexa Rep Incidence |
| BM91                | 60            | 5                 | 54             | 2                   | 23               | 0                   | 0                | 0                  |
| BM92                | 26            | 8                 | 83             | 2                   | 24               | 0                   | 0                | 0                  |
| BM93                | 48            | 6                 | 66             | 0                   | 0                | 1                   | 15               | 0                  |
| BM94                | 58            | 9                 | 93             | 0                   | 0                | 0                   | 0                | 1                  |
| BM39                | 60            | 6                 | 76             | 2                   | 24               | 0                   | 0                | 0                  |
| BM40                | 86            | 13                | 163            | 1                   | 12               | 0                   | 0                | 0                  |
| BM41                | 99            | 6                 | 67             | 1                   | 16               | 0                   | 0                | 0                  |
| BM42                | 70            | 4                 | 49             | 0                   | 0                | 0                   | 0                | 0                  |
| BM43                | 58            | 5                 | 55             | 2                   | 24               | 0                   | 0                | 0                  |
| BM44                | 24            | 5                 | 62             | 0                   | 0                | 0                   | 0                | 0                  |
| BM45                | 64            | 4                 | 46             | 0                   | 0                | 3                   | 45               | 0                  |
| BM46                | 84            | 7                 | 98             | 0                   | 0                | 0                   | 0                | 0                  |
| BM47                | 86            | 10                | 128            | 0                   | 0                | 0                   | 0                | 0                  |
| BM48                | 77            | 5                 | 56             | 1                   | 11               | 0                   | 0                | 0                  |
| BM49                | 58            | 4                 | 45             | 0                   | 0                | 0                   | 0                | 0                  |
| BM50                | 96            | 5                 | 52             | 2                   | 23               | 0                   | 0                | 0                  |
| BM51                | 44            | 4                 | 43             | 2                   | 24               | 0                   | 0                | 0                  |
| BM52                | 66            | 8                 | 93             | 0                   | 0                | 0                   | 0                | 0                  |
| BM53                | 72            | 1                 | 14             | 1                   | 15               | 0                   | 0                | 0                  |
| BM54                | 36            | 9                 | 107            | 2                   | 25               | 0                   | 0                | 0                  |
| BM55                | 64            | 4                 | 42             | 1                   | 11               | 0                   | 0                | 0                  |
| BM56                | 54            | 1                 | 11             | 1                   | 13               | 0                   | 0                | 1                  |
| BM57                | 80            | 4                 | 39             | 1                   | 12               | 0                   | 0                | 0                  |
| BM58                | 60            | 2                 | 33             | 1                   | 12               | 1                   | 15               | 1                  |
| BM59                | 50            | 3                 | 30             | 1                   | 11               | 0                   | 0                | 0                  |
| BM60                | 59            | 4                 | 49             | 1                   | 12               | 0                   | 0                | 0                  |
| BM61                | 42            | 7                 | 73             | 1                   | 11               | 0                   | 0                | 0                  |
| BM62                | 59            | 4                 | 48             | 0                   | 0                | 0                   | 0                | 0                  |
| BM64                | 89            | 6                 | 65             | 1                   | 13               | 0                   | 0                | 1                  |
| BM65                | 77            | 12                | 144            | 2                   | 23               | 0                   | 0                | 2                  |
| BM66                | 66            | 3                 | 34             | 0                   | 0                | 0                   | 0                | 0                  |
| BM67                | 76            | 12                | 141            | 0                   | 0                | 1                   | 15               | 0                  |
| BM68                | 88            | 12                | 133            | 1                   | 11               | 3                   | 47               | 0                  |
| BM69                | 42            | 9                 | 92             | 1                   | 12               | 0                   | 0                | 0                  |
| BM70                | 72            | 5                 | 60             | 1                   | 11               | 0                   | 0                | 0                  |
| BM95                | 68            | 2                 | 23             | 1                   | 11               | 0                   | 0                | 3                  |
| BM96                | 48            | 1                 | 14             | 0                   | 0                | 0                   | 0                | 0                  |
| BM71                | 60            | 4                 | 46             | 1                   | 12               | 1                   | 15               | 0                  |
| BM72                | 83            | 7                 | 78             | 0                   | 0                | 0                   | 0                | 0                  |

and cSSRs extrac

| Genome Serial | Di Tract Size | Tri Rep Incidence | Tri Tract Size | Tetra Rep Incidence | Tetra Tract Size | Penta Rep Incidence | Penta Tract Size | Hexa Rep Incidence |
|---------------|---------------|-------------------|----------------|---------------------|------------------|---------------------|------------------|--------------------|
| No.           |               |                   |                |                     |                  |                     |                  |                    |
| BM73          | 47            | 2                 | 24             | 1                   | 13               | 0                   | 0                | 0                  |
| BM74          | 68            | 7                 | 68             | 0                   | 0                | 0                   | 0                | 0                  |
| BM75          | 64            | 6                 | 68             | 0                   | 0                | 0                   | 0                | 0                  |
| BM76          | 60            | 2                 | 21             | 0                   | 0                | 0                   | 0                | 0                  |
| BM77          | 52            | 5                 | 55             | 0                   | 0                | 0                   | 0                | 0                  |
| BM78          | 42            | 5                 | 54             | 1                   | 12               | 1                   | 14               | 0                  |
| BM79          | 99            | 6                 | 70             | 3                   | 34               | 0                   | 0                | 0                  |
| BM80          | 36            | 5                 | 49             | 2                   | 24               | 0                   | 0                | 0                  |
| BM81          | 44            | 5                 | 63             | 0                   | 0                | 0                   | 0                | 0                  |
| BM82          | 62            | 4                 | 40             | 1                   | 12               | 0                   | 0                | 0                  |
| BM83          | 72            | 3                 | 31             | 1                   | 11               | 1                   | 15               | 0                  |
| BM84          | 90            | 3                 | 34             | 1                   | 11               | 0                   | 0                | 0                  |
| BM85          | 95            | 5                 | 75             | 2                   | 23               | 0                   | 0                | 1                  |
| BM86          | 70            | 6                 | 62             | 1                   | 11               | 0                   | 0                | 0                  |
| BM87          | 52            | 6                 | 70             | 1                   | 12               | 0                   | 0                | 0                  |
| BM88          | 83            | 4                 | 43             | 2                   | 24               | 1                   | 19               | 0                  |
| BM97          | 90            | 8                 | 92             | 0                   | 0                | 0                   | 0                | 0                  |
| BM98          | 75            | 7                 | 83             | 1                   | 12               | 0                   | 0                | 0                  |
| BM99          | 99            | 10                | 106            | 1                   | 11               | 0                   | 0                | 0                  |
| BM100         | 83            | 4                 | 39             | 0                   | 0                | 0                   | 0                | 1                  |

| and cSSRs extracted |                 |                           |                        |                     |                  |                     |                  |
|---------------------|-----------------|---------------------------|------------------------|---------------------|------------------|---------------------|------------------|
| Genome Serial       | Hexa Tract Size | Grand Total Rep Incidence | Grand Total Tract-size | A SSR Rep Incidence | A SSR Tract-size | C SSR Rep Incidence | C SSR Tract-size |
| BM2                 | 0               | 30                        | 213                    | 4                   | 26               | 1                   | 6                |
| BM3                 | 36              | 31                        | 257                    | 6                   | 40               | 3                   | 19               |
| BM4                 | 0               | 37                        | 270                    | 6                   | 44               | 0                   | 0                |
| BM5                 | 0               | 24                        | 171                    | 1                   | 8                | 1                   | 7                |
| BM6                 | 24              | 30                        | 274                    | 3                   | 24               | 1                   | 8                |
| BM7                 | 19              | 35                        | 324                    | 6                   | 40               | 0                   | 0                |
| BM8                 | 19              | 30                        | 250                    | 5                   | 37               | 0                   | 0                |
| BM9                 | 0               | 31                        | 252                    | 5                   | 33               | 0                   | 0                |
| BM10                | 0               | 26                        | 189                    | 3                   | 20               | 1                   | 6                |
| BM11                | 0               | 36                        | 254                    | 5                   | 34               | 2                   | 12               |
| BM12                | 18              | 36                        | 273                    | 10                  | 72               | 3                   | 18               |
| BM13                | 0               | 32                        | 266                    | 3                   | 30               | 3                   | 19               |
| BM14                | 0               | 35                        | 263                    | 5                   | 37               | 0                   | 0                |
| BM15                | 0               | 25                        | 176                    | 1                   | 10               | 1                   | 6                |
| BM16                | 0               | 30                        | 231                    | 3                   | 18               | 1                   | 7                |
| BM17                | 0               | 35                        | 273                    | 5                   | 38               | 4                   | 25               |
| BM18                | 43              | 35                        | 304                    | 8                   | 60               | 0                   | 0                |
| BM19                | 0               | 24                        | 176                    | 2                   | 16               | 1                   | 9                |
| BM20                | 0               | 29                        | 214                    | 2                   | 14               | 0                   | 0                |
| BM21                | 0               | 18                        | 147                    | 1                   | 7                | 2                   | 16               |
| BM22                | 0               | 37                        | 285                    | 5                   | 40               | 0                   | 0                |
| BM23                | 0               | 26                        | 195                    | 2                   | 15               | 1                   | 8                |
| BM24                | 0               | 34                        | 273                    | 1                   | 8                | 0                   | 0                |
| BM25                | 0               | 37                        | 281                    | 12                  | 86               | 3                   | 19               |
| BM26                | 0               | 32                        | 226                    | 10                  | 70               | 2                   | 12               |
| BM27                | 0               | 39                        | 302                    | 4                   | 25               | 1                   | 7                |
| BM28                | 0               | 34                        | 256                    | 7                   | 49               | 1                   | 7                |
| BM29                | 18              | 36                        | 285                    | 8                   | 61               | 3                   | 18               |
| BM30                | 0               | 32                        | 252                    | 7                   | 44               | 1                   | 6                |
| BM31                | 0               | 31                        | 222                    | 4                   | 26               | 0                   | 0                |
| BM32                | 0               | 26                        | 184                    | 4                   | 31               | 0                   | 0                |
| BM33                | 0               | 29                        | 174                    | 5                   | 30               | 0                   | 0                |
| BM34                | 0               | 36                        | 288                    | 6                   | 38               | 0                   | 0                |
| BM35                | 0               | 22                        | 164                    | 5                   | 31               | 2                   | 13               |
| BM36                | 24              | 32                        | 238                    | 9                   | 67               | 1                   | 6                |
| BM37                | 13              | 31                        | 244                    | 3                   | 20               | 0                   | 0                |
| BM38                | 12              | 22                        | 154                    | 1                   | 6                | 2                   | 12               |
| BM89                | 0               | 34                        | 292                    | 4                   | 36               | 3                   | 19               |
| BM90                | 0               | 32                        | 260                    | 5                   | 39               | 3                   | 19               |

and cSSRs extrac

| Genome Serial | Hexa Tract Size | Grand Total Rep Incidence | Grand Total Tract-size | A SSR Rep Incidence | A SSR Tract-size | C SSR Rep Incidence | C SSR Tract-size |
|---------------|-----------------|---------------------------|------------------------|---------------------|------------------|---------------------|------------------|
| BM91          | 0               | 29                        | 237                    | 3                   | 30               | 0                   | 0                |
| BM92          | 0               | 26                        | 211                    | 4                   | 27               | 1                   | 7                |
| BM93          | 0               | 23                        | 184                    | 3                   | 22               | 0                   | 0                |
| BM94          | 19              | 26                        | 221                    | 2                   | 16               | 0                   | 0                |
| BM39          | 0               | 40                        | 302                    | 8                   | 53               | 0                   | 0                |
| BM40          | 0               | 45                        | 374                    | 8                   | 54               | 0                   | 0                |
| BM41          | 0               | 39                        | 301                    | 9                   | 59               | 1                   | 6                |
| BM42          | 0               | 34                        | 249                    | 10                  | 66               | 0                   | 0                |
| BM43          | 0               | 30                        | 230                    | 7                   | 47               | 0                   | 0                |
| BM44          | 0               | 28                        | 209                    | 2                   | 14               | 2                   | 12               |
| BM45          | 0               | 31                        | 250                    | 5                   | 39               | 1                   | 7                |
| BM46          | 0               | 37                        | 289                    | 5                   | 37               | 0                   | 0                |
| BM47          | 0               | 35                        | 284                    | 4                   | 28               | 1                   | 6                |
| BM48          | 0               | 33                        | 250                    | 6                   | 43               | 0                   | 0                |
| BM49          | 0               | 39                        | 282                    | 11                  | 76               | 1                   | 6                |
| BM50          | 0               | 38                        | 270                    | 4                   | 29               | 1                   | 6                |
| BM51          | 0               | 26                        | 205                    | 3                   | 24               | 1                   | 6                |
| BM52          | 0               | 34                        | 253                    | 4                   | 25               | 1                   | 6                |
| BM53          | 0               | 32                        | 226                    | 3                   | 18               | 2                   | 12               |
| BM54          | 0               | 38                        | 301                    | 10                  | 64               | 1                   | 6                |
| BM55          | 0               | 27                        | 197                    | 4                   | 28               | 0                   | 0                |
| BM56          | 18              | 22                        | 163                    | 4                   | 28               | 0                   | 0                |
| BM57          | 0               | 25                        | 183                    | 4                   | 30               | 1                   | 6                |
| BM58          | 18              | 31                        | 241                    | 5                   | 34               | 2                   | 12               |
| BM59          | 0               | 19                        | 140                    | 1                   | 7                | 0                   | 0                |
| BM60          | 0               | 24                        | 191                    | 4                   | 26               | 0                   | 0                |
| BM61          | 0               | 28                        | 216                    | 6                   | 46               | 1                   | 7                |
| BM62          | 0               | 32                        | 234                    | 9                   | 59               | 0                   | 0                |
| BM64          | 19              | 35                        | 276                    | 4                   | 24               | 1                   | 6                |
| BM65          | 35              | 47                        | 405                    | 7                   | 44               | 0                   | 0                |
| BM66          | 0               | 25                        | 192                    | 6                   | 44               | 2                   | 13               |
| BM67          | 0               | 40                        | 341                    | 9                   | 61               | 0                   | 0                |
| BM68          | 0               | 46                        | 389                    | 9                   | 57               | 0                   | 0                |
| BM69          | 0               | 37                        | 279                    | 5                   | 35               | 0                   | 0                |
| BM70          | 0               | 32                        | 230                    | 6                   | 38               | 1                   | 6                |
| BM95          | 102             | 37                        | 347                    | 4                   | 26               | 1                   | 6                |
| BM96          | 0               | 24                        | 159                    | 5                   | 35               | 0                   | 0                |
| BM71          | 0               | 25                        | 191                    | 2                   | 13               | 1                   | 8                |
| BM72          | 0               | 31                        | 232                    | 3                   | 20               | 0                   | 0                |

and cSSRs extracted

| Genome Serial | Hexa Tract Size | Grand Total Rep Incidence | Grand Total Tract-size | A SSR Rep Incidence | A SSR Tract-size | C SSR Rep Incidence | C SSR Tract-size |
|---------------|-----------------|---------------------------|------------------------|---------------------|------------------|---------------------|------------------|
| BM73          | 0               | 26                        | 188                    | 5                   | 32               | 0                   | 0                |
| BM74          | 0               | 26                        | 195                    | 2                   | 12               | 0                   | 0                |
| BM75          | 0               | 21                        | 176                    | 2                   | 12               | 3                   | 19               |
| BM76          | 0               | 21                        | 138                    | 2                   | 13               | 5                   | 32               |
| BM77          | 0               | 24                        | 176                    | 1                   | 6                | 5                   | 30               |
| BM78          | 0               | 21                        | 168                    | 2                   | 15               | 2                   | 13               |
| BM79          | 0               | 33                        | 258                    | 2                   | 13               | 0                   | 0                |
| BM80          | 0               | 18                        | 140                    | 2                   | 12               | 0                   | 0                |
| BM81          | 0               | 20                        | 158                    | 1                   | 6                | 4                   | 24               |
| BM82          | 0               | 21                        | 150                    | 2                   | 12               | 1                   | 6                |
| BM83          | 0               | 29                        | 215                    | 1                   | 6                | 6                   | 41               |
| BM84          | 0               | 31                        | 212                    | 3                   | 21               | 3                   | 19               |
| BM85          | 19              | 56                        | 490                    | 13                  | 103              | 6                   | 38               |
| BM86          | 0               | 27                        | 203                    | 2                   | 13               | 1                   | 6                |
| BM87          | 0               | 21                        | 173                    | 3                   | 19               | 0                   | 0                |
| BM88          | 0               | 39                        | 342                    | 6                   | 47               | 0                   | 0                |
| BM97          | 0               | 38                        | 285                    | 3                   | 23               | 0                   | 0                |
| BM98          | 0               | 31                        | 254                    | 3                   | 25               | 1                   | 6                |
| BM99          | 0               | 45                        | 347                    | 7                   | 49               | 2                   | 13               |
| BM100         | 18              | 27                        | 208                    | 7                   | 56               | 0                   | 0                |

| and cSSRs extracted |                     |                  |                     |                  |             |             |                     |                  |
|---------------------|---------------------|------------------|---------------------|------------------|-------------|-------------|---------------------|------------------|
| Genome Serial No.   | G SSR Rep Incidence | G SSR Tract-size | T SSR Rep Incidence | T SSR Tract-size | SSR AT%     | SSR GC%     | AT/TA Rep incidence | AT/TA Tract Size |
| BM2                 | 3                   | 27               | 4                   | 25               | 60.71428571 | 39.28571429 | 1                   | 6                |
| BM3                 | 3                   | 18               | 6                   | 39               | 68.10344828 | 31.89655172 | 0                   | 0                |
| BM4                 | 1                   | 6                | 7                   | 46               | 93.75       | 6.25        | 2                   | 12               |
| BM5                 | 1                   | 8                | 8                   | 59               | 81.70731707 | 18.29268293 | 2                   | 12               |
| BM6                 | 1                   | 6                | 8                   | 59               | 85.56701031 | 14.43298969 | 3                   | 20               |
| BM7                 | 2                   | 15               | 7                   | 46               | 85.14851485 | 14.85148515 | 3                   | 18               |
| BM8                 | 2                   | 13               | 6                   | 38               | 85.22727273 | 14.77272727 | 1                   | 6                |
| BM9                 | 2                   | 12               | 9                   | 62               | 88.78504673 | 11.21495327 | 2                   | 12               |
| BM10                | 2                   | 13               | 5                   | 33               | 73.61111111 | 26.38888889 | 5                   | 35               |
| BM11                | 2                   | 12               | 11                  | 70               | 81.25       | 18.75       | 3                   | 18               |
| BM12                | 2                   | 12               | 4                   | 27               | 76.74418605 | 23.25581395 | 4                   | 24               |
| BM13                | 3                   | 21               | 9                   | 71               | 71.63120567 | 28.36879433 | 1                   | 6                |
| BM14                | 1                   | 6                | 8                   | 50               | 93.5483871  | 6.451612903 | 5                   | 30               |
| BM15                | 2                   | 12               | 8                   | 55               | 78.31325301 | 21.68674699 | 4                   | 24               |
| BM16                | 1                   | 7                | 7                   | 48               | 82.5        | 17.5        | 3                   | 18               |
| BM17                | 3                   | 20               | 10                  | 65               | 69.59459459 | 30.40540541 | 1                   | 6                |
| BM18                | 4                   | 24               | 11                  | 76               | 85          | 15          | 1                   | 6                |
| BM19                | 1                   | 6                | 4                   | 25               | 73.21428571 | 26.78571429 | 1                   | 6                |
| BM20                | 1                   | 6                | 4                   | 25               | 86.66666667 | 13.33333333 | 4                   | 24               |
| BM21                | 2                   | 12               | 2                   | 14               | 42.85714286 | 57.14285714 | 1                   | 6                |
| BM22                | 3                   | 19               | 10                  | 72               | 85.49618321 | 14.50381679 | 3                   | 18               |
| BM23                | 1                   | 6                | 8                   | 50               | 82.27848101 | 17.72151899 | 1                   | 6                |
| BM24                | 0                   | 0                | 9                   | 54               | 100         | 0           | 4                   | 29               |
| BM25                | 2                   | 12               | 2                   | 14               | 76.33587786 | 23.66412214 | 4                   | 29               |
| BM26                | 2                   | 12               | 4                   | 26               | 80          | 20          | 3                   | 18               |
| BM27                | 3                   | 18               | 10                  | 61               | 77.47747748 | 22.52252252 | 5                   | 35               |
| BM28                | 2                   | 12               | 13                  | 86               | 87.66233766 | 12.33766234 | 2                   | 17               |
| BM29                | 2                   | 12               | 7                   | 49               | 78.57142857 | 21.42857143 | 1                   | 6                |
| BM30                | 1                   | 7                | 8                   | 67               | 89.51612903 | 10.48387097 | 6                   | 38               |
| BM31                | 1                   | 6                | 11                  | 75               | 94.39252336 | 5.607476636 | 4                   | 24               |
| BM32                | 2                   | 13               | 5                   | 33               | 83.11688312 | 16.88311688 | 4                   | 24               |
| BM33                | 0                   | 0                | 9                   | 54               | 100         | 0           | 3                   | 18               |
| BM34                | 1                   | 6                | 9                   | 60               | 94.23076923 | 5.769230769 | 2                   | 17               |
| BM35                | 1                   | 6                | 3                   | 20               | 72.85714286 | 27.14285714 | 4                   | 24               |
| BM36                | 0                   | 0                | 4                   | 24               | 93.81443299 | 6.18556701  | 3                   | 18               |
| BM37                | 4                   | 34               | 2                   | 13               | 49.25373134 | 50.74626866 | 1                   | 11               |
| BM38                | 0                   | 0                | 3                   | 19               | 67.56756757 | 32.43243243 | 2                   | 14               |
| BM89                | 3                   | 21               | 9                   | 76               | 73.68421053 | 26.31578947 | 1                   | 6                |
| BM90                | 2                   | 15               | 8                   | 65               | 75.36231884 | 24.63768116 | 0                   | 0                |

| and cSSRs extracted |     | G SSR Rep Incidence | G SSR Tract-size | T SSR Rep Incidence | T SSR Tract-size | SSR AT%     | SSR GC% | AT/TA Rep incidence | AT/TA Tract Size |
|---------------------|-----|---------------------|------------------|---------------------|------------------|-------------|---------|---------------------|------------------|
| Genome Serial       | No. |                     |                  |                     |                  |             |         |                     |                  |
| BM91                | 4   | 24                  | 6                | 46                  | 76               | 24          | 2       | 12                  |                  |
| BM92                | 2   | 13                  | 5                | 31                  | 74.35897436      | 25.64102564 | 0       | 0                   |                  |
| BM93                | 2   | 12                  | 3                | 21                  | 78.18181818      | 21.81818182 | 2       | 12                  |                  |
| BM94                | 1   | 9                   | 4                | 26                  | 82.35294118      | 17.64705882 | 2       | 12                  |                  |
| BM39                | 2   | 15                  | 12               | 74                  | 89.43661972      | 10.56338028 | 3       | 18                  |                  |
| BM40                | 1   | 6                   | 8                | 53                  | 94.69026549      | 5.309734513 | 4       | 26                  |                  |
| BM41                | 0   | 0                   | 7                | 54                  | 94.95798319      | 5.042016807 | 5       | 30                  |                  |
| BM42                | 0   | 0                   | 10               | 64                  | 100              | 0           | 4       | 34                  |                  |
| BM43                | 0   | 0                   | 7                | 46                  | 100              | 0           | 1       | 6                   |                  |
| BM44                | 4   | 25                  | 11               | 72                  | 69.91869919      | 30.08130081 | 2       | 12                  |                  |
| BM45                | 2   | 12                  | 6                | 37                  | 80               | 20          | 5       | 34                  |                  |
| BM46                | 1   | 6                   | 10               | 64                  | 94.39252336      | 5.607476636 | 1       | 6                   |                  |
| BM47                | 2   | 12                  | 4                | 24                  | 74.28571429      | 25.71428571 | 3       | 20                  |                  |
| BM48                | 0   | 0                   | 9                | 63                  | 100              | 0           | 5       | 35                  |                  |
| BM49                | 1   | 7                   | 13               | 90                  | 92.73743017      | 7.262569832 | 5       | 34                  |                  |
| BM50                | 0   | 0                   | 10               | 64                  | 93.93939394      | 6.060606061 | 6       | 36                  |                  |
| BM51                | 0   | 0                   | 9                | 64                  | 93.61702128      | 6.382978723 | 3       | 20                  |                  |
| BM52                | 1   | 6                   | 9                | 57                  | 87.23404255      | 12.76595745 | 4       | 24                  |                  |
| BM53                | 1   | 6                   | 12               | 89                  | 85.6             | 14.4        | 5       | 30                  |                  |
| BM54                | 0   | 0                   | 10               | 63                  | 95.4887218       | 4.511278195 | 0       | 0                   |                  |
| BM55                | 0   | 0                   | 8                | 52                  | 100              | 0           | 2       | 12                  |                  |
| BM56                | 2   | 14                  | 4                | 25                  | 79.10447761      | 20.89552239 | 4       | 24                  |                  |
| BM57                | 0   | 0                   | 2                | 16                  | 88.46153846      | 11.53846154 | 1       | 6                   |                  |
| BM58                | 2   | 13                  | 7                | 44                  | 75.72815534      | 24.27184466 | 1       | 6                   |                  |
| BM59                | 0   | 0                   | 6                | 42                  | 100              | 0           | 2       | 12                  |                  |
| BM60                | 0   | 0                   | 6                | 45                  | 100              | 0           | 2       | 12                  |                  |
| BM61                | 0   | 0                   | 6                | 37                  | 92.22222222      | 7.777777778 | 5       | 30                  |                  |
| BM62                | 0   | 0                   | 10               | 68                  | 100              | 0           | 3       | 23                  |                  |
| BM64                | 0   | 0                   | 9                | 60                  | 93.33333333      | 6.666666667 | 2       | 14                  |                  |
| BM65                | 1   | 6                   | 11               | 76                  | 95.23809524      | 4.761904762 | 4       | 24                  |                  |
| BM66                | 3   | 18                  | 2                | 17                  | 66.30434783      | 33.69565217 | 1       | 11                  |                  |
| BM67                | 0   | 0                   | 6                | 48                  | 100              | 0           | 4       | 24                  |                  |
| BM68                | 0   | 0                   | 7                | 53                  | 100              | 0           | 2       | 14                  |                  |
| BM69                | 1   | 7                   | 14               | 91                  | 94.73684211      | 5.263157895 | 4       | 24                  |                  |
| BM70                | 0   | 0                   | 7                | 43                  | 93.10344828      | 6.896551724 | 4       | 24                  |                  |
| BM95                | 3   | 18                  | 13               | 93                  | 83.21678322      | 16.78321678 | 4       | 32                  |                  |
| BM96                | 3   | 20                  | 7                | 42                  | 79.3814433       | 20.6185567  | 4       | 24                  |                  |
| BM71                | 0   | 0                   | 6                | 37                  | 86.20689655      | 13.79310345 | 4       | 24                  |                  |
| BM72                | 0   | 0                   | 8                | 51                  | 100              | 0           | 0       | 0                   |                  |

| and cSSRs extracted |                     |                  |                     |                  |             |             |                     |                  |     |
|---------------------|---------------------|------------------|---------------------|------------------|-------------|-------------|---------------------|------------------|-----|
| Genome Serial       | G SSR Rep Incidence | G SSR Tract-size | T SSR Rep Incidence | T SSR Tract-size | SSR AT%     | SSR GC%     | AT/TA Rep incidence | AT/TA Tract Size | No. |
| BM73                | 0                   | 0                | 11                  | 72               | 100         | 0           | 6                   | 41               |     |
| BM74                | 0                   | 0                | 7                   | 47               | 100         | 0           | 4                   | 26               |     |
| BM75                | 0                   | 0                | 2                   | 13               | 56.81818182 | 43.18181818 | 1                   | 6                |     |
| BM76                | 0                   | 0                | 2                   | 12               | 43.85964912 | 56.14035088 | 4                   | 24               |     |
| BM77                | 1                   | 6                | 4                   | 27               | 47.82608696 | 52.17391304 | 2                   | 12               |     |
| BM78                | 0                   | 0                | 3                   | 18               | 71.73913043 | 28.26086957 | 3                   | 18               |     |
| BM79                | 0                   | 0                | 7                   | 42               | 100         | 0           | 4                   | 24               |     |
| BM80                | 1                   | 6                | 2                   | 13               | 80.64516129 | 19.35483871 | 2                   | 12               |     |
| BM81                | 2                   | 14               | 1                   | 7                | 25.49019608 | 74.50980392 | 3                   | 18               |     |
| BM82                | 2                   | 12               | 1                   | 6                | 50          | 50          | 2                   | 12               |     |
| BM83                | 3                   | 19               | 3                   | 20               | 30.23255814 | 69.76744186 | 3                   | 18               |     |
| BM84                | 1                   | 6                | 5                   | 31               | 67.53246753 | 32.46753247 | 8                   | 48               |     |
| BM85                | 6                   | 40               | 9                   | 97               | 71.94244604 | 28.05755396 | 3                   | 29               |     |
| BM86                | 0                   | 0                | 6                   | 41               | 90          | 10          | 5                   | 32               |     |
| BM87                | 0                   | 0                | 3                   | 20               | 100         | 0           | 4                   | 28               |     |
| BM88                | 0                   | 0                | 13                  | 126              | 100         | 0           | 1                   | 6                |     |
| BM97                | 3                   | 22               | 9                   | 58               | 78.6407767  | 21.3592233  | 3                   | 18               |     |
| BM98                | 2                   | 14               | 6                   | 39               | 76.19047619 | 23.80952381 | 1                   | 6                |     |
| BM99                | 5                   | 32               | 5                   | 37               | 65.64885496 | 34.35114504 | 1                   | 13               |     |
| BM100               | 0                   | 0                | 2                   | 12               | 100         | 0           | 2                   | 12               |     |

| and cSSRs extracted |     | CA/AC Rep incidence | CA/AC Tract Size | AG/GA Rep incidence | AG/GA Tract Size | CT/TC Rep incidence | CT/TC Tract Size | GT/TG Rep incidence |
|---------------------|-----|---------------------|------------------|---------------------|------------------|---------------------|------------------|---------------------|
| Genome Serial       | No. |                     |                  |                     |                  |                     |                  |                     |
| BM2                 | 4   | 24                  | 2                | 12                  | 4                | 24                  | 2                |                     |
| BM3                 | 0   | 0                   | 2                | 12                  | 3                | 20                  | 0                |                     |
| BM4                 | 2   | 12                  | 3                | 18                  | 9                | 59                  | 1                |                     |
| BM5                 | 3   | 18                  | 3                | 18                  | 1                | 10                  | 2                |                     |
| BM6                 | 1   | 6                   | 2                | 12                  | 3                | 20                  | 0                |                     |
| BM7                 | 1   | 8                   | 0                | 0                   | 0                | 0                   | 2                |                     |
| BM8                 | 2   | 16                  | 7                | 42                  | 0                | 0                   | 0                |                     |
| BM9                 | 0   | 0                   | 1                | 6                   | 3                | 24                  | 1                |                     |
| BM10                | 2   | 12                  | 0                | 0                   | 3                | 18                  | 1                |                     |
| BM11                | 0   | 0                   | 1                | 8                   | 3                | 18                  | 1                |                     |
| BM12                | 1   | 6                   | 4                | 24                  | 0                | 0                   | 1                |                     |
| BM13                | 0   | 0                   | 2                | 12                  | 3                | 18                  | 1                |                     |
| BM14                | 0   | 0                   | 1                | 6                   | 5                | 34                  | 2                |                     |
| BM15                | 0   | 0                   | 1                | 6                   | 4                | 26                  | 0                |                     |
| BM16                | 3   | 22                  | 2                | 16                  | 2                | 16                  | 2                |                     |
| BM17                | 1   | 6                   | 0                | 0                   | 2                | 14                  | 1                |                     |
| BM18                | 0   | 0                   | 1                | 6                   | 2                | 14                  | 0                |                     |
| BM19                | 1   | 6                   | 4                | 24                  | 3                | 18                  | 2                |                     |
| BM20                | 4   | 24                  | 2                | 12                  | 3                | 18                  | 1                |                     |
| BM21                | 1   | 6                   | 3                | 18                  | 1                | 6                   | 1                |                     |
| BM22                | 1   | 6                   | 0                | 0                   | 6                | 36                  | 1                |                     |
| BM23                | 0   | 0                   | 0                | 0                   | 5                | 32                  | 2                |                     |
| BM24                | 1   | 6                   | 0                | 0                   | 4                | 26                  | 3                |                     |
| BM25                | 2   | 12                  | 4                | 24                  | 1                | 6                   | 0                |                     |
| BM26                | 0   | 0                   | 4                | 24                  | 2                | 12                  | 1                |                     |
| BM27                | 0   | 0                   | 3                | 18                  | 2                | 12                  | 1                |                     |
| BM28                | 1   | 6                   | 1                | 6                   | 1                | 6                   | 1                |                     |
| BM29                | 0   | 0                   | 2                | 17                  | 2                | 12                  | 2                |                     |
| BM30                | 1   | 6                   | 1                | 6                   | 2                | 17                  | 0                |                     |
| BM31                | 1   | 6                   | 1                | 6                   | 1                | 6                   | 1                |                     |
| BM32                | 1   | 6                   | 1                | 6                   | 4                | 24                  | 2                |                     |
| BM33                | 1   | 6                   | 1                | 6                   | 5                | 30                  | 0                |                     |
| BM34                | 3   | 18                  | 3                | 18                  | 1                | 6                   | 0                |                     |
| BM35                | 0   | 0                   | 1                | 6                   | 0                | 0                   | 2                |                     |
| BM36                | 1   | 6                   | 5                | 30                  | 3                | 18                  | 2                |                     |
| BM37                | 2   | 12                  | 2                | 12                  | 6                | 36                  | 3                |                     |
| BM38                | 4   | 24                  | 1                | 6                   | 3                | 18                  | 2                |                     |
| BM89                | 0   | 0                   | 2                | 12                  | 3                | 18                  | 1                |                     |
| BM90                | 0   | 0                   | 1                | 6                   | 6                | 36                  | 0                |                     |

| and cSSRs extracted |     | CA/AC Rep incidence | CA/AC Tract Size | AG/GA Rep incidence | AG/GA Tract Size | CT/TC Rep incidence | CT/TC Tract Size | GT/TG Rep incidence |
|---------------------|-----|---------------------|------------------|---------------------|------------------|---------------------|------------------|---------------------|
| Genome Serial       | No. |                     |                  |                     |                  |                     |                  |                     |
| BM91                | 1   | 6                   | 1                | 6                   | 4                | 26                  | 1                |                     |
| BM92                | 0   | 0                   | 0                | 0                   | 1                | 6                   | 1                |                     |
| BM93                | 0   | 0                   | 2                | 12                  | 3                | 18                  | 1                |                     |
| BM94                | 1   | 6                   | 2                | 16                  | 3                | 18                  | 0                |                     |
| BM39                | 1   | 6                   | 2                | 12                  | 2                | 12                  | 2                |                     |
| BM40                | 2   | 12                  | 2                | 12                  | 3                | 18                  | 2                |                     |
| BM41                | 1   | 6                   | 4                | 28                  | 2                | 12                  | 3                |                     |
| BM42                | 1   | 6                   | 1                | 6                   | 4                | 24                  | 0                |                     |
| BM43                | 3   | 18                  | 1                | 10                  | 2                | 12                  | 2                |                     |
| BM44                | 1   | 6                   | 0                | 0                   | 1                | 6                   | 0                |                     |
| BM45                | 1   | 6                   | 1                | 6                   | 2                | 12                  | 0                |                     |
| BM46                | 2   | 12                  | 1                | 6                   | 9                | 54                  | 1                |                     |
| BM47                | 1   | 6                   | 6                | 36                  | 4                | 24                  | 0                |                     |
| BM48                | 2   | 12                  | 3                | 18                  | 1                | 6                   | 1                |                     |
| BM49                | 1   | 6                   | 0                | 0                   | 2                | 12                  | 1                |                     |
| BM50                | 5   | 30                  | 1                | 6                   | 1                | 6                   | 3                |                     |
| BM51                | 3   | 18                  | 0                | 0                   | 1                | 6                   | 0                |                     |
| BM52                | 2   | 12                  | 1                | 6                   | 2                | 12                  | 1                |                     |
| BM53                | 3   | 18                  | 0                | 0                   | 2                | 12                  | 2                |                     |
| BM54                | 2   | 12                  | 0                | 0                   | 2                | 12                  | 2                |                     |
| BM55                | 4   | 26                  | 0                | 0                   | 3                | 20                  | 1                |                     |
| BM56                | 1   | 6                   | 1                | 6                   | 2                | 12                  | 1                |                     |
| BM57                | 4   | 24                  | 3                | 20                  | 3                | 18                  | 1                |                     |
| BM58                | 1   | 6                   | 3                | 18                  | 3                | 18                  | 2                |                     |
| BM59                | 1   | 6                   | 1                | 6                   | 3                | 20                  | 1                |                     |
| BM60                | 0   | 0                   | 3                | 23                  | 2                | 12                  | 1                |                     |
| BM61                | 0   | 0                   | 1                | 6                   | 1                | 6                   | 0                |                     |
| BM62                | 4   | 24                  | 0                | 0                   | 2                | 12                  | 0                |                     |
| BM64                | 4   | 24                  | 2                | 12                  | 3                | 23                  | 2                |                     |
| BM65                | 2   | 17                  | 1                | 6                   | 3                | 18                  | 1                |                     |
| BM66                | 3   | 23                  | 1                | 8                   | 3                | 18                  | 1                |                     |
| BM67                | 4   | 24                  | 1                | 6                   | 2                | 12                  | 1                |                     |
| BM68                | 6   | 38                  | 2                | 12                  | 2                | 12                  | 2                |                     |
| BM69                | 2   | 12                  | 0                | 0                   | 1                | 6                   | 0                |                     |
| BM70                | 1   | 6                   | 2                | 12                  | 2                | 12                  | 3                |                     |
| BM95                | 4   | 24                  | 0                | 0                   | 1                | 6                   | 1                |                     |
| BM96                | 0   | 0                   | 0                | 0                   | 3                | 18                  | 0                |                     |
| BM71                | 4   | 24                  | 0                | 0                   | 1                | 6                   | 1                |                     |
| BM72                | 4   | 24                  | 1                | 6                   | 6                | 41                  | 2                |                     |

| and cSSRs extracted |     | CA/AC Rep incidence | CA/AC Tract Size | AG/GA Rep incidence | AG/GA Tract Size | CT/TC Rep incidence | CT/TC Tract Size | GT/TG Rep incidence |
|---------------------|-----|---------------------|------------------|---------------------|------------------|---------------------|------------------|---------------------|
| Genome Serial       | No. |                     |                  |                     |                  |                     |                  |                     |
| BM73                | 0   | 0                   | 0                | 0                   | 0                | 0                   | 0                | 1                   |
| BM74                | 2   | 12                  | 1                | 8                   | 2                | 16                  | 16               | 1                   |
| BM75                | 0   | 0                   | 3                | 20                  | 1                | 6                   | 6                | 1                   |
| BM76                | 0   | 0                   | 1                | 8                   | 2                | 12                  | 12               | 1                   |
| BM77                | 3   | 22                  | 0                | 0                   | 1                | 6                   | 6                | 1                   |
| BM78                | 1   | 6                   | 0                | 0                   | 2                | 12                  | 12               | 0                   |
| BM79                | 2   | 12                  | 0                | 0                   | 6                | 36                  | 36               | 2                   |
| BM80                | 0   | 0                   | 0                | 0                   | 1                | 6                   | 6                | 1                   |
| BM81                | 1   | 8                   | 2                | 12                  | 1                | 6                   | 6                | 0                   |
| BM82                | 0   | 0                   | 2                | 12                  | 3                | 18                  | 18               | 1                   |
| BM83                | 3   | 18                  | 1                | 8                   | 1                | 6                   | 6                | 2                   |
| BM84                | 1   | 6                   | 1                | 8                   | 3                | 18                  | 18               | 1                   |
| BM85                | 2   | 12                  | 5                | 30                  | 4                | 24                  | 24               | 0                   |
| BM86                | 3   | 20                  | 1                | 8                   | 1                | 6                   | 6                | 1                   |
| BM87                | 1   | 6                   | 0                | 0                   | 2                | 12                  | 12               | 0                   |
| BM88                | 1   | 6                   | 3                | 23                  | 4                | 24                  | 24               | 2                   |
| BM97                | 2   | 12                  | 5                | 30                  | 3                | 18                  | 18               | 1                   |
| BM98                | 2   | 12                  | 3                | 18                  | 3                | 18                  | 18               | 2                   |
| BM99                | 1   | 6                   | 4                | 24                  | 5                | 30                  | 30               | 4                   |
| BM100               | 4   | 24                  | 4                | 29                  | 1                | 6                   | 6                | 1                   |

| and cSSRs extracted |                  |                     |                  |                        |                     |          |        |         |           |
|---------------------|------------------|---------------------|------------------|------------------------|---------------------|----------|--------|---------|-----------|
| Genome Serial No.   | GT/TG Tract Size | CG/GC Rep incidence | CG/GC Tract Size | DI Total Rep incidence | DI Total Tract Size | MONO CDS | DI CDS | TRI CDS | TETRA CDS |
| BM2                 | 12               | 0                   | 0                | 13                     | 78                  | 7        | 11     | 3       | 0         |
| BM3                 | 0                | 0                   | 0                | 5                      | 32                  | 12       | 4      | 3       | 0         |
| BM4                 | 6                | 1                   | 6                | 18                     | 113                 | 7        | 14     | 5       | 0         |
| BM5                 | 12               | 1                   | 8                | 12                     | 78                  | 8        | 8      | 0       | 1         |
| BM6                 | 0                | 0                   | 0                | 9                      | 58                  | 8        | 7      | 6       | 0         |
| BM7                 | 12               | 1                   | 6                | 7                      | 44                  | 8        | 5      | 7       | 1         |
| BM8                 | 0                | 0                   | 0                | 10                     | 64                  | 12       | 9      | 4       | 1         |
| BM9                 | 6                | 0                   | 0                | 7                      | 48                  | 14       | 6      | 5       | 2         |
| BM10                | 6                | 0                   | 0                | 11                     | 71                  | 8        | 8      | 2       | 0         |
| BM11                | 6                | 1                   | 6                | 9                      | 56                  | 14       | 7      | 5       | 0         |
| BM12                | 6                | 0                   | 0                | 10                     | 60                  | 13       | 8      | 3       | 1         |
| BM13                | 6                | 0                   | 0                | 7                      | 42                  | 12       | 6      | 4       | 1         |
| BM14                | 12               | 0                   | 0                | 13                     | 82                  | 10       | 11     | 4       | 1         |
| BM15                | 0                | 0                   | 0                | 9                      | 56                  | 6        | 8      | 3       | 0         |
| BM16                | 12               | 0                   | 0                | 12                     | 84                  | 11       | 10     | 5       | 1         |
| BM17                | 6                | 0                   | 0                | 5                      | 32                  | 20       | 3      | 6       | 0         |
| BM18                | 0                | 0                   | 0                | 4                      | 26                  | 18       | 3      | 4       | 1         |
| BM19                | 12               | 0                   | 0                | 11                     | 66                  | 5        | 9      | 3       | 0         |
| BM20                | 6                | 0                   | 0                | 14                     | 84                  | 4        | 12     | 5       | 0         |
| BM21                | 8                | 0                   | 0                | 7                      | 44                  | 6        | 6      | 3       | 1         |
| BM22                | 6                | 0                   | 0                | 11                     | 66                  | 11       | 10     | 6       | 1         |
| BM23                | 17               | 0                   | 0                | 8                      | 55                  | 8        | 8      | 2       | 0         |
| BM24                | 20               | 1                   | 6                | 13                     | 87                  | 9        | 12     | 6       | 3         |
| BM25                | 0                | 0                   | 0                | 11                     | 71                  | 12       | 9      | 3       | 2         |
| BM26                | 6                | 0                   | 0                | 10                     | 60                  | 11       | 9      | 3       | 1         |
| BM27                | 10               | 0                   | 0                | 11                     | 75                  | 13       | 11     | 7       | 1         |
| BM28                | 6                | 0                   | 0                | 6                      | 41                  | 16       | 6      | 3       | 1         |
| BM29                | 12               | 1                   | 6                | 8                      | 53                  | 17       | 5      | 7       | 0         |
| BM30                | 0                | 0                   | 0                | 10                     | 67                  | 15       | 8      | 4       | 0         |
| BM31                | 6                | 0                   | 0                | 8                      | 48                  | 14       | 8      | 5       | 1         |
| BM32                | 12               | 0                   | 0                | 12                     | 72                  | 10       | 11     | 3       | 0         |
| BM33                | 0                | 0                   | 0                | 10                     | 60                  | 13       | 9      | 4       | 0         |
| BM34                | 0                | 0                   | 0                | 9                      | 59                  | 12       | 8      | 6       | 0         |
| BM35                | 12               | 0                   | 0                | 7                      | 42                  | 7        | 6      | 3       | 1         |
| BM36                | 12               | 0                   | 0                | 14                     | 84                  | 8        | 13     | 1       | 0         |
| BM37                | 20               | 0                   | 0                | 14                     | 91                  | 6        | 7      | 6       | 1         |
| BM38                | 14               | 0                   | 0                | 12                     | 76                  | 3        | 9      | 2       | 1         |
| BM89                | 6                | 0                   | 0                | 7                      | 42                  | 13       | 6      | 4       | 1         |
| BM90                | 0                | 0                   | 0                | 7                      | 42                  | 11       | 7      | 5       | 0         |

| and cSSRs extracted |                  |                     |                  |                        |                     |          |        |         |           |  |
|---------------------|------------------|---------------------|------------------|------------------------|---------------------|----------|--------|---------|-----------|--|
| Genome Serial No.   | GT/TG Tract Size | CG/GC Rep incidence | CG/GC Tract Size | DI Total Rep incidence | DI Total Tract Size | MONO CDS | DI CDS | TRI CDS | TETRA CDS |  |
| BM91                | 10               | 0                   | 0                | 9                      | 60                  | 7        | 8      | 5       | 2         |  |
| BM92                | 6                | 2                   | 14               | 4                      | 26                  | 11       | 2      | 6       | 2         |  |
| BM93                | 6                | 0                   | 0                | 8                      | 48                  | 4        | 8      | 4       | 0         |  |
| BM94                | 0                | 1                   | 6                | 9                      | 58                  | 5        | 6      | 6       | 0         |  |
| BM39                | 12               | 0                   | 0                | 10                     | 60                  | 17       | 9      | 5       | 1         |  |
| BM40                | 12               | 1                   | 6                | 14                     | 86                  | 10       | 10     | 11      | 0         |  |
| BM41                | 23               | 0                   | 0                | 15                     | 99                  | 15       | 12     | 4       | 0         |  |
| BM42                | 0                | 0                   | 0                | 10                     | 70                  | 16       | 9      | 4       | 0         |  |
| BM43                | 12               | 0                   | 0                | 9                      | 58                  | 9        | 9      | 3       | 1         |  |
| BM44                | 0                | 0                   | 0                | 4                      | 24                  | 14       | 3      | 4       | 0         |  |
| BM45                | 0                | 1                   | 6                | 10                     | 64                  | 10       | 8      | 3       | 0         |  |
| BM46                | 6                | 0                   | 0                | 14                     | 84                  | 11       | 13     | 7       | 0         |  |
| BM47                | 0                | 0                   | 0                | 14                     | 86                  | 9        | 10     | 8       | 0         |  |
| BM48                | 6                | 0                   | 0                | 12                     | 77                  | 12       | 11     | 4       | 1         |  |
| BM49                | 6                | 0                   | 0                | 9                      | 58                  | 21       | 7      | 4       | 0         |  |
| BM50                | 18               | 0                   | 0                | 16                     | 96                  | 12       | 11     | 5       | 2         |  |
| BM51                | 0                | 0                   | 0                | 7                      | 44                  | 11       | 7      | 4       | 2         |  |
| BM52                | 6                | 1                   | 6                | 11                     | 66                  | 10       | 10     | 7       | 0         |  |
| BM53                | 12               | 0                   | 0                | 12                     | 72                  | 12       | 9      | 1       | 0         |  |
| BM54                | 12               | 0                   | 0                | 6                      | 36                  | 19       | 5      | 8       | 2         |  |
| BM55                | 6                | 0                   | 0                | 10                     | 64                  | 10       | 9      | 4       | 1         |  |
| BM56                | 6                | 0                   | 0                | 9                      | 54                  | 7        | 7      | 1       | 1         |  |
| BM57                | 6                | 1                   | 6                | 13                     | 80                  | 7        | 12     | 4       | 1         |  |
| BM58                | 12               | 0                   | 0                | 10                     | 60                  | 12       | 6      | 2       | 0         |  |
| BM59                | 6                | 0                   | 0                | 8                      | 50                  | 3        | 5      | 2       | 1         |  |
| BM60                | 6                | 1                   | 6                | 9                      | 59                  | 6        | 7      | 4       | 1         |  |
| BM61                | 0                | 0                   | 0                | 7                      | 42                  | 9        | 6      | 5       | 1         |  |
| BM62                | 0                | 0                   | 0                | 9                      | 59                  | 16       | 9      | 4       | 0         |  |
| BM64                | 16               | 0                   | 0                | 13                     | 89                  | 11       | 10     | 6       | 0         |  |
| BM65                | 6                | 1                   | 6                | 12                     | 77                  | 13       | 11     | 10      | 1         |  |
| BM66                | 6                | 0                   | 0                | 9                      | 66                  | 9        | 8      | 2       | 0         |  |
| BM67                | 10               | 0                   | 0                | 12                     | 76                  | 10       | 11     | 11      | 0         |  |
| BM68                | 12               | 0                   | 0                | 14                     | 88                  | 12       | 12     | 11      | 1         |  |
| BM69                | 0                | 0                   | 0                | 7                      | 42                  | 17       | 6      | 8       | 1         |  |
| BM70                | 18               | 0                   | 0                | 12                     | 72                  | 9        | 12     | 3       | 1         |  |
| BM95                | 6                | 0                   | 0                | 10                     | 68                  | 19       | 8      | 2       | 1         |  |
| BM96                | 0                | 1                   | 6                | 8                      | 48                  | 11       | 7      | 1       | 0         |  |
| BM71                | 6                | 0                   | 0                | 10                     | 60                  | 7        | 9      | 3       | 1         |  |
| BM72                | 12               | 0                   | 0                | 13                     | 83                  | 10       | 9      | 6       | 0         |  |

| and cSSRs extracted |                  |                     |                  |                        |                     |          |        |         |           |
|---------------------|------------------|---------------------|------------------|------------------------|---------------------|----------|--------|---------|-----------|
| Genome Serial No.   | GT/TG Tract Size | CG/GC Rep incidence | CG/GC Tract Size | DI Total Rep incidence | DI Total Tract Size | MONO CDS | DI CDS | TRI CDS | TETRA CDS |
| BM73                | 6                | 0                   | 0                | 7                      | 47                  | 15       | 6      | 2       | 1         |
| BM74                | 6                | 0                   | 0                | 10                     | 68                  | 8        | 7      | 7       | 0         |
| BM75                | 13               | 2                   | 19               | 8                      | 64                  | 4        | 3      | 6       | 0         |
| BM76                | 6                | 2                   | 12               | 10                     | 60                  | 7        | 9      | 2       | 0         |
| BM77                | 6                | 1                   | 6                | 8                      | 52                  | 9        | 5      | 5       | 0         |
| BM78                | 0                | 1                   | 6                | 7                      | 42                  | 5        | 4      | 4       | 1         |
| BM79                | 14               | 1                   | 13               | 15                     | 99                  | 8        | 11     | 6       | 2         |
| BM80                | 6                | 2                   | 12               | 6                      | 36                  | 4        | 5      | 2       | 2         |
| BM81                | 0                | 0                   | 0                | 7                      | 44                  | 6        | 6      | 5       | 0         |
| BM82                | 6                | 2                   | 14               | 10                     | 62                  | 5        | 9      | 2       | 1         |
| BM83                | 16               | 1                   | 8                | 11                     | 72                  | 9        | 8      | 2       | 1         |
| BM84                | 6                | 1                   | 6                | 15                     | 90                  | 11       | 10     | 3       | 1         |
| BM85                | 0                | 0                   | 0                | 14                     | 95                  | 17       | 12     | 5       | 2         |
| BM86                | 6                | 0                   | 0                | 11                     | 70                  | 7        | 7      | 6       | 1         |
| BM87                | 0                | 1                   | 6                | 8                      | 52                  | 5        | 6      | 5       | 1         |
| BM88                | 12               | 2                   | 12               | 13                     | 83                  | 3        | 11     | 4       | 2         |
| BM97                | 6                | 1                   | 6                | 15                     | 90                  | 12       | 10     | 8       | 0         |
| BM98                | 21               | 0                   | 0                | 11                     | 75                  | 9        | 9      | 7       | 1         |
| BM99                | 26               | 0                   | 0                | 15                     | 99                  | 13       | 11     | 10      | 1         |
| BM100               | 6                | 1                   | 6                | 13                     | 83                  | 0        | 12     | 3       | 0         |

and cSSRs extrac

| Genome Serial | PENTA CDS | HEXA CDS | CDS Total | VP1 | VP2 | VP4 | VP1/VP2 | VP1/VP3 | VP2/VP3 | VP1/VP2/VP3 | LTA | STA | LTA/STA | LTA/PALTA | LTA/ALTO | LTA/MTA |
|---------------|-----------|----------|-----------|-----|-----|-----|---------|---------|---------|-------------|-----|-----|---------|-----------|----------|---------|
| No.           |           |          |           |     |     |     |         |         |         |             |     |     |         |           |          |         |
| BM2           | 0         | 0        | 21        | 5   | 3   | 0   |         |         |         |             | 8   | 4   | 1       |           |          |         |
| BM3           | 2         | 1        | 22        | 5   | 1   | 0   |         |         |         |             | 11  | 0   | 5       |           |          |         |
| BM4           | 0         | 0        | 26        | 5   | 1   | 0   |         |         | 4       |             | 11  | 3   | 2       |           |          |         |
| BM5           | 0         | 0        | 17        | 1   | 6   | 0   |         |         |         |             | 8   | 1   | 1       |           |          |         |
| BM6           | 0         | 1        | 22        | 6   | 3   | 0   |         |         |         |             | 10  | 3   |         |           |          |         |
| BM7           | 1         | 1        | 23        | 4   | 2   | 0   |         |         | 1       |             | 15  | 1   |         |           |          |         |
| BM8           | 0         | 0        | 26        | 7   | 2   | 0   |         |         |         |             | 13  | 2   | 2       |           |          |         |
| BM9           | 0         | 0        | 27        | 1   | 2   | 0   |         |         | 1       | 2           | 17  | 4   | 0       |           |          |         |
| BM10          | 0         | 0        | 18        | 3   | 4   | 0   |         |         | 0       | 0           | 8   | 2   | 1       |           |          |         |
| BM11          | 0         | 0        | 26        | 4   | 2   | 0   |         |         | 2       | 0           | 14  | 2   | 2       |           |          |         |
| BM12          | 0         | 1        | 26        | 6   | 1   | 0   |         |         | 0       | 0           | 14  | 3   | 2       |           |          |         |
| BM13          | 0         | 0        | 23        | 5   | 1   | 0   |         |         | 4       | 0           | 10  | 1   | 2       |           |          |         |
| BM14          | 1         | 0        | 27        | 5   | 1   | 0   |         |         | 1       | 0           | 12  | 1   | 0       |           |          |         |
| BM15          | 0         | 0        | 17        | 2   | 4   | 0   |         |         |         |             | 7   | 2   | 2       |           |          |         |
| BM16          | 0         | 0        | 27        | 8   | 1   | 0   |         |         | 2       |             | 10  | 2   | 4       |           |          |         |
| BM17          | 0         | 0        | 29        | 6   | 3   | 0   |         |         | 1       | 2           | 15  | 2   |         |           |          |         |
| BM18          | 0         | 1        | 27        | 3   | 4   | 0   | 2       |         |         |             | 13  | 3   | 2       |           |          |         |
| BM19          | 0         | 0        | 17        | 1   | 1   | 0   | 0       |         | 2       | 0           | 7   | 0   |         |           |          | 6       |
| BM20          | 0         | 0        | 21        | 5   | 1   | 0   |         |         |         |             | 11  | 1   | 3       |           |          |         |
| BM21          | 0         | 0        | 16        | 2   | 0   | 0   | 0       |         | 2       | 0           | 6   | 0   |         |           |          | 4       |
| BM22          | 0         | 0        | 28        | 7   | 2   | 0   |         |         | 2       |             | 13  | 4   |         |           |          |         |
| BM23          | 0         | 0        | 18        | 3   | 0   | 0   | 0       |         | 2       | 0           | 13  | 0   | 0       |           |          | 0       |
| BM24          | 0         | 0        | 30        | 5   | 3   | 0   | 0       |         | 1       | 1           | 17  | 3   | 0       |           |          | 0       |
| BM25          | 0         | 0        | 26        | 3   | 1   | 0   | 0       | 1       | 2       | 0           | 17  | 1   | 1       |           |          |         |
| BM26          | 0         | 0        | 24        | 5   | 1   | 0   |         |         |         | 1           | 13  | 2   | 2       |           |          |         |
| BM27          | 0         | 0        | 32        | 7   | 5   | 0   | 2       | 0       | 0       | 0           | 15  | 1   | 2       |           |          |         |
| BM28          | 0         | 0        | 26        | 2   | 6   | 0   | 2       |         |         |             | 12  | 2   | 2       |           |          |         |
| BM29          | 0         | 1        | 30        | 6   | 6   | 0   | 2       |         |         |             | 10  | 3   | 3       |           |          |         |
| BM30          | 1         | 0        | 28        | 2   | 4   | 0   | 3       |         |         |             | 13  | 3   | 3       |           |          |         |
| BM31          | 0         | 0        | 28        | 5   | 3   | 0   |         |         | 1       | 2           | 9   | 6   | 2       |           |          |         |
| BM32          | 0         | 0        | 24        | 8   | 2   | 0   |         |         |         | 1           | 12  | 1   |         |           |          |         |
| BM33          | 0         | 0        | 26        | 6   | 2   | 0   |         |         |         |             | 14  | 2   | 2       |           |          |         |
| BM34          | 0         | 0        | 26        | 4   | 0   | 0   |         |         | 3       | 2           | 12  | 5   |         |           |          |         |
| BM35          | 0         | 0        | 17        | 4   | 0   | 0   |         |         | 2       |             | 9   | 1   | 1       |           |          |         |
| BM36          | 1         | 0        | 23        | 4   | 1   | 0   |         |         | 4       |             | 0   | 2   | 12      |           |          |         |
| BM37          | 0         | 0        | 20        | 5   | 3   | 0   | 1       |         |         |             | 11  | 0   |         |           |          |         |
| BM38          | 0         | 0        | 15        | 5   | 0   | 0   |         |         |         |             | 4   | 0   |         |           |          | 6       |
| BM89          | 1         | 0        | 25        | 5   | 2   | 0   |         |         | 4       |             | 11  | 0   | 3       |           |          |         |
| BM90          | 0         | 0        | 23        | 4   | 1   | 0   |         |         | 5       |             | 11  | 0   | 2       |           |          |         |

and cSSRs extrac

| Genome Serial | PENTA CDS | HEXA CDS | CDS Total | VP1 | VP2 | VP4 | VP1/VP2 | VP1/VP3 | VP2/VP3 | VP1/VP2/VP3 | LTA | STA | LTA/STA | LTA/PALTA | LTA/ALTO | LTA/MTA |
|---------------|-----------|----------|-----------|-----|-----|-----|---------|---------|---------|-------------|-----|-----|---------|-----------|----------|---------|
| No.           |           |          |           |     |     |     |         |         |         |             |     |     |         |           |          |         |
| BM91          | 0         | 0        | 22        | 3   | 1   | 0   |         |         | 2       |             | 14  | 1   | 1       |           |          |         |
| BM92          | 0         | 0        | 21        | 5   | 0   | 0   |         |         |         |             | 9   | 2   | 5       |           |          |         |
| BM93          | 1         | 0        | 17        | 4   | 0   | 0   |         |         |         |             | 6   | 4   | 3       |           |          |         |
| BM94          | 0         | 1        | 18        | 2   | 0   | 0   |         |         | 3       |             | 8   | 2   | 1       | 2         |          |         |
| BM39          | 0         | 0        | 32        | 4   | 10  | 0   | 1       |         |         |             | 16  | 1   |         |           |          |         |
| BM40          | 0         | 0        | 31        | 6   | 2   | 0   | 1       |         |         |             | 18  | 2   | 2       |           |          |         |
| BM41          | 0         | 0        | 31        | 6   | 3   | 0   | 3       |         |         |             | 15  | 3   | 1       |           |          |         |
| BM42          | 0         | 0        | 29        | 5   | 7   | 0   |         |         |         |             | 11  | 3   | 1       |           |          |         |
| BM43          | 0         | 0        | 22        | 4   | 2   | 0   |         |         |         | 1           | 11  | 1   | 1       |           |          |         |
| BM44          | 0         | 0        | 21        | 2   | 0   | 0   |         |         | 2       |             | 12  | 3   | 2       |           |          |         |
| BM45          | 3         | 0        | 24        | 3   | 6   | 0   |         |         |         |             | 9   | 5   | 1       |           |          |         |
| BM46          | 0         | 0        | 31        | 5   | 2   | 0   | 2       |         |         |             | 15  | 4   | 3       |           |          |         |
| BM47          | 0         | 0        | 27        | 3   | 1   | 0   |         |         | 6       | 2           | 13  | 2   |         |           |          |         |
| BM48          | 0         | 0        | 28        | 3   | 2   | 0   |         |         | 2       |             | 18  | 1   | 1       |           |          |         |
| BM49          | 0         | 0        | 32        | 0   | 0   | 0   |         |         |         |             | 0   | 0   |         |           |          |         |
| BM50          | 0         | 0        | 30        | 4   | 0   | 0   |         |         | 2       | 2           | 17  | 4   | 1       |           |          |         |
| BM51          | 0         | 0        | 24        | 2   | 0   | 0   |         |         | 4       |             | 13  | 2   | 3       |           |          |         |
| BM52          | 0         | 0        | 27        | 2   | 3   | 0   |         |         | 1       | 2           | 14  | 0   | 2       |           | 3        |         |
| BM53          | 0         | 0        | 22        | 5   | 0   | 0   |         |         | 2       |             | 14  | 0   | 1       |           |          |         |
| BM54          | 0         | 0        | 34        | 5   | 3   | 0   |         |         |         |             | 15  | 5   |         |           |          |         |
| BM55          | 0         | 0        | 24        | 1   | 2   | 0   |         |         | 1       |             | 16  | 2   | 1       |           |          |         |
| BM56          | 0         | 1        | 17        | 4   | 1   | 0   |         |         | 1       |             | 10  | 0   | 1       |           |          |         |
| BM57          | 0         | 0        | 24        | 5   | 1   | 0   |         |         | 2       | 1           | 8   | 3   | 4       |           |          |         |
| BM58          | 1         | 1        | 22        | 3   | 0   | 0   |         |         | 2       | 3           | 11  | 2   | 1       |           |          |         |
| BM59          | 0         | 0        | 11        | 2   | 1   | 0   |         |         | 1       |             | 6   | 1   |         |           |          |         |
| BM60          | 0         | 0        | 18        | 4   | 0   | 0   |         |         | 2       |             | 9   | 2   | 1       |           |          |         |
| BM61          | 0         | 0        | 21        | 3   | 0   | 0   |         |         | 6       | 2           | 9   | 0   | 1       |           |          |         |
| BM62          | 0         | 0        | 29        | 3   | 3   | 0   |         |         | 3       | 1           | 16  | 0   | 2       |           |          |         |
| BM64          | 0         | 0        | 27        | 2   | 1   | 0   |         |         | 6       | 2           | 10  | 4   | 2       |           |          |         |
| BM65          | 0         | 2        | 37        | 4   | 0   | 0   |         |         | 6       | 2           | 19  | 4   | 2       |           |          |         |
| BM66          | 0         | 0        | 19        | 3   | 3   | 0   | 1       |         |         |             | 9   | 2   | 1       |           |          |         |
| BM67          | 1         | 0        | 33        | 6   | 3   | 0   |         |         | 2       | 2           | 17  | 1   | 1       |           |          |         |
| BM68          | 2         | 0        | 38        | 6   | 5   | 0   | 2       |         |         |             | 21  | 1   | 3       |           |          |         |
| BM69          | 0         | 0        | 32        | 1   | 2   | 0   |         |         | 2       | 2           | 19  | 3   | 3       |           |          |         |
| BM70          | 0         | 0        | 25        | 3   | 3   | 0   |         |         | 3       |             | 13  | 1   | 1       |           |          |         |
| BM95          | 0         | 3        | 33        | 4   | 2   | 0   |         |         | 1       |             | 21  | 2   | 2       |           |          |         |
| BM96          | 0         | 0        | 19        | 3   | 1   | 0   |         |         | 1       |             | 8   | 2   | 2       | 2         |          |         |
| BM71          | 0         | 0        | 20        | 6   | 3   | 0   |         |         | 1       | 1           | 6   | 1   | 2       |           |          |         |
| BM72          | 0         | 0        | 25        | 5   | 1   | 0   |         |         | 2       | 1           | 12  | 3   | 1       |           |          |         |

| and cSSRs extracted |           |          |           |     |     |     |         |         |         |             |     |     |         |           |          |         |  |
|---------------------|-----------|----------|-----------|-----|-----|-----|---------|---------|---------|-------------|-----|-----|---------|-----------|----------|---------|--|
| Genome Serial No.   | PENTA CDS | HEXA CDS | CDS Total | VP1 | VP2 | VP4 | VP1/VP2 | VP1/VP3 | VP2/VP3 | VP1/VP2/VP3 | LTA | STA | LTA/STA | LTA/PALTA | LTA/ALTO | LTA/MTA |  |
| BM73                | 0         | 0        | 24        | 3   | 2   | 0   |         |         | 4       |             | 9   | 5   | 1       |           |          |         |  |
| BM74                | 0         | 0        | 22        | 2   | 2   | 0   |         |         | 1       |             | 11  | 0   |         |           |          | 2       |  |
| BM75                | 0         | 0        | 13        | 3   | 0   | 0   |         |         |         |             | 1   | 0   | 1       |           |          |         |  |
| BM76                | 0         | 0        | 18        | 5   | 0   | 0   |         |         | 3       |             | 6   | 2   | 1       |           |          |         |  |
| BM77                | 0         | 0        | 19        | 4   | 1   | 0   |         |         | 1       |             | 9   | 1   |         |           |          |         |  |
| BM78                | 1         | 0        | 15        | 2   | 1   | 1   |         |         | 3       | 1           | 6   | 1   |         |           |          |         |  |
| BM79                | 0         | 0        | 27        | 3   | 1   | 0   |         |         | 5       | 1           | 9   | 0   | 6       |           |          |         |  |
| BM80                | 0         | 0        | 13        | 1   | 1   | 0   |         |         | 2       | 2           | 3   | 1   |         |           | 2        |         |  |
| BM81                | 0         | 0        | 17        | 4   | 1   | 0   |         |         | 1       |             | 9   | 0   |         |           | 2        |         |  |
| BM82                | 0         | 0        | 17        | 4   | 1   | 0   |         |         | 2       | 1           | 5   | 2   |         |           |          |         |  |
| BM83                | 1         | 0        | 21        | 5   | 0   | 0   |         |         | 3       |             | 8   | 3   | 2       |           |          |         |  |
| BM84                | 0         | 0        | 25        | 3   | 0   | 0   |         |         | 5       | 4           | 10  | 3   |         |           |          |         |  |
| BM85                | 0         | 1        | 37        | 7   | 12  | 0   | 3       |         |         |             | 15  | 0   |         |           |          |         |  |
| BM86                | 0         | 0        | 21        | 1   | 1   | 0   |         |         |         |             | 14  | 3   | 2       |           |          |         |  |
| BM87                | 0         | 0        | 17        | 2   | 3   | 0   |         |         |         |             | 10  | 2   |         |           |          |         |  |
| BM88                | 0         | 1        | 21        | 0   | 8   | 0   |         |         |         |             | 12  | 0   |         |           |          |         |  |
| BM97                | 0         | 0        | 30        | 1   | 2   | 0   |         |         | 4       |             | 17  | 4   | 2       |           |          |         |  |
| BM98                | 0         | 0        | 26        | 0   | 1   | 0   |         |         | 1       |             | 7   | 1   |         |           |          |         |  |
| BM99                | 0         | 0        | 35        | 6   | 7   | 0   |         |         |         |             | 15  | 0   |         |           |          |         |  |
| BM100               | 0         | 0        | 15        | 1   | 5   | 0   |         |         |         |             | 9   | 0   |         |           |          |         |  |

and cSSRs extracted

| Genome Serial | LTA/STA/MTA | STA/MTA | LTA/ATA | LTA/STA/ATA | STA/ATA | AgP | AGNO/VP2 | LTA/MTA/ALTO | ORF-X | putative protein 2 |
|---------------|-------------|---------|---------|-------------|---------|-----|----------|--------------|-------|--------------------|
| BM2           |             |         |         |             |         | 0   |          |              | 0     | 0                  |
| BM3           |             |         |         |             |         | 0   |          |              | 0     | 0                  |
| BM4           |             |         |         |             |         | 0   |          |              | 0     | 0                  |
| BM5           |             |         |         |             |         | 0   |          |              | 0     | 0                  |
| BM6           |             |         |         |             |         | 0   |          |              | 0     | 0                  |
| BM7           |             |         |         |             |         | 0   |          |              | 0     | 0                  |
| BM8           |             |         |         |             |         | 0   |          |              | 0     | 0                  |
| BM9           |             |         |         |             |         | 0   |          |              | 0     | 0                  |
| BM10          |             |         |         |             |         | 0   |          |              | 0     | 0                  |
| BM11          |             |         |         |             |         | 0   |          |              | 0     | 0                  |
| BM12          |             |         |         |             |         | 0   |          |              | 0     | 0                  |
| BM13          |             |         |         |             |         | 0   |          |              | 0     | 0                  |
| BM14          |             |         | 4       | 2           | 1       | 0   |          |              | 0     | 0                  |
| BM15          |             |         |         |             |         | 0   |          |              | 0     | 0                  |
| BM16          |             |         |         |             |         | 0   |          |              | 0     | 0                  |
| BM17          |             |         |         |             |         | 0   |          |              | 0     | 0                  |
| BM18          |             |         |         |             |         | 0   |          |              | 0     | 0                  |
| BM19          |             |         |         |             |         | 0   |          |              | 0     | 0                  |
| BM20          |             |         |         |             |         | 0   |          |              | 0     | 0                  |
| BM21          | 1           | 1       |         |             |         | 0   |          |              | 0     | 0                  |
| BM22          |             |         |         |             |         | 0   |          |              | 0     | 0                  |
| BM23          | 0           | 0       | 0       | 0           | 0       | 0   |          |              | 0     | 0                  |
| BM24          | 0           | 0       | 0       | 0           | 0       | 0   |          |              | 0     | 0                  |
| BM25          |             |         |         |             |         | 0   |          |              | 0     | 0                  |
| BM26          |             |         |         |             |         | 0   |          |              | 0     | 0                  |
| BM27          |             |         |         |             |         | 0   |          |              | 0     | 0                  |
| BM28          |             |         |         |             |         | 0   |          |              | 0     | 0                  |
| BM29          |             |         |         |             |         | 0   |          |              | 0     | 0                  |
| BM30          |             |         |         |             |         | 0   |          |              | 0     | 0                  |
| BM31          |             |         |         |             |         | 0   |          |              | 0     | 0                  |
| BM32          |             |         |         |             |         | 0   |          |              | 0     | 0                  |
| BM33          |             |         |         |             |         | 0   |          |              | 0     | 0                  |
| BM34          |             |         |         |             |         | 0   |          |              | 0     | 0                  |
| BM35          |             |         |         |             |         | 0   |          |              | 0     | 0                  |
| BM36          |             |         |         |             |         | 0   |          |              | 0     | 0                  |
| BM37          |             |         |         |             |         | 0   |          |              | 0     | 0                  |
| BM38          |             |         |         |             |         | 0   |          |              | 0     | 0                  |
| BM89          |             |         |         |             |         | 0   |          |              | 0     | 0                  |
| BM90          |             |         |         |             |         | 0   |          |              | 0     | 0                  |

and cSSRs extracted

| Genome Serial | LTA/STA/MTA | STA/MTA | LTA/ATA | LTA/STA/ATA | STA/ATA | AgP | AGNO/VP2 | LTA/MTA/ALTO | ORF-X | putative protein 2 |
|---------------|-------------|---------|---------|-------------|---------|-----|----------|--------------|-------|--------------------|
| No.           |             |         |         |             |         |     |          |              |       |                    |
| BM91          |             |         |         |             |         | 0   |          |              | 0     | 0                  |
| BM92          |             |         |         |             |         | 0   |          |              | 0     | 0                  |
| BM93          |             |         |         |             |         | 0   |          |              | 0     | 0                  |
| BM94          |             |         |         |             |         | 0   |          |              | 0     | 0                  |
| BM39          |             |         |         |             |         | 0   |          |              | 0     | 0                  |
| BM40          |             |         |         |             |         | 0   |          |              | 0     | 0                  |
| BM41          |             |         |         |             |         | 0   |          |              | 0     | 0                  |
| BM42          |             |         |         |             |         | 2   |          |              | 0     | 0                  |
| BM43          |             |         |         |             |         | 2   |          |              | 0     | 0                  |
| BM44          |             |         |         |             |         | 0   |          |              | 0     | 0                  |
| BM45          |             |         |         |             |         | 0   |          |              | 0     | 0                  |
| BM46          |             |         |         |             |         | 0   |          |              | 0     | 0                  |
| BM47          |             |         |         |             |         | 0   |          |              | 0     | 0                  |
| BM48          |             |         |         |             |         | 1   |          |              | 0     | 0                  |
| BM49          |             |         |         |             |         | 0   |          |              | 0     | 0                  |
| BM50          |             |         |         |             |         | 0   |          |              | 0     | 0                  |
| BM51          |             |         |         |             |         | 0   |          |              | 0     | 0                  |
| BM52          |             |         |         |             |         | 0   |          |              | 0     | 0                  |
| BM53          |             |         |         |             |         | 0   |          |              | 0     | 0                  |
| BM54          |             |         |         |             |         | 2   |          |              | 0     | 0                  |
| BM55          |             |         |         |             |         | 1   |          |              | 0     | 0                  |
| BM56          |             |         |         |             |         | 0   |          |              | 0     | 0                  |
| BM57          |             |         |         |             |         | 0   |          |              | 0     | 0                  |
| BM58          |             |         |         |             |         | 0   |          |              | 0     | 0                  |
| BM59          |             |         |         |             |         | 0   |          |              | 0     | 0                  |
| BM60          |             |         |         |             |         | 0   |          |              | 0     | 0                  |
| BM61          |             |         |         |             |         | 0   |          |              | 0     | 0                  |
| BM62          |             |         |         |             |         | 1   |          |              | 0     | 0                  |
| BM64          |             |         |         |             |         | 0   |          |              | 0     | 0                  |
| BM65          |             |         |         |             |         | 0   |          |              | 0     | 0                  |
| BM66          |             |         |         |             |         | 0   |          |              | 0     | 0                  |
| BM67          |             |         |         |             |         | 1   |          |              | 0     | 0                  |
| BM68          |             |         |         |             |         | 0   |          |              | 0     | 0                  |
| BM69          |             |         |         |             |         | 0   |          |              | 0     | 0                  |
| BM70          |             |         |         |             |         | 1   |          |              | 0     | 0                  |
| BM95          |             |         |         |             |         | 0   | 1        |              | 0     | 0                  |
| BM96          |             |         |         |             |         | 0   | 0        |              | 0     | 0                  |
| BM71          |             |         |         |             |         | 0   |          |              | 0     | 0                  |
| BM72          |             |         |         |             |         | 0   |          |              | 0     | 0                  |

and cSSRs extrac

| Genome Serial | LTA/STA/MTA | STA/MTA | LTA/ATA | LTA/STA/ATA | STA/ATA | AgP | AGNO/VP2 | LTA/MTA/ALTO | ORF-X | putative protein 2 |
|---------------|-------------|---------|---------|-------------|---------|-----|----------|--------------|-------|--------------------|
| BM73          |             |         |         |             |         | 0   |          |              | 0     | 0                  |
| BM74          | 1           | 3       |         |             |         | 0   |          |              | 0     | 0                  |
| BM75          |             |         |         |             |         | 0   |          |              | 4     | 3                  |
| BM76          |             |         |         |             |         | 0   |          |              | 0     | 0                  |
| BM77          |             |         |         |             |         | 0   |          |              | 3     | 0                  |
| BM78          |             |         |         |             |         | 0   |          |              | 0     | 0                  |
| BM79          |             |         |         |             |         | 0   |          |              | 2     | 0                  |
| BM80          |             |         |         |             |         | 0   |          |              | 3     | 0                  |
| BM81          |             |         |         |             |         | 0   |          |              | 0     | 0                  |
| BM82          |             |         |         |             |         |     |          |              | 2     | 0                  |
| BM83          |             |         |         |             |         | 0   |          |              | 0     | 0                  |
| BM84          |             |         |         |             |         | 0   |          |              | 0     | 0                  |
| BM85          |             |         |         |             |         | 0   |          |              | 0     | 0                  |
| BM86          |             |         |         |             |         | 0   |          |              | 0     | 0                  |
| BM87          |             |         |         |             |         | 0   |          |              | 0     | 0                  |
| BM88          |             |         |         |             |         | 0   |          |              | 0     | 0                  |
| BM97          |             |         |         |             |         | 0   |          |              | 0     | 0                  |
| BM98          | 3           | 2       |         |             |         | 0   |          |              | 3     | 0                  |
| BM99          |             |         |         |             |         | 0   |          |              | 0     | 0                  |
| BM100         |             |         |         |             |         | 0   |          |              | 0     | 0                  |

| and cSSRs extracted |                                       |                         |                        |      |      |     |        |            |    |
|---------------------|---------------------------------------|-------------------------|------------------------|------|------|-----|--------|------------|----|
| Genome Serial       | putative protein 2/putative protein 3 | agnoprotein 1a/1b/2a/2b | Cys-pro leader peptide | ORF1 | ORF2 | MCP | VP2/HP | VP1/VP2/HP | HP |
| No.                 |                                       |                         |                        |      |      |     |        |            |    |
| BM2                 |                                       |                         |                        | 0    | 0    | 0   | 0      |            | 0  |
| BM3                 |                                       |                         |                        | 0    | 0    | 0   | 0      |            | 0  |
| BM4                 |                                       |                         |                        | 0    | 0    | 0   | 0      |            | 0  |
| BM5                 |                                       |                         |                        | 0    | 0    | 0   | 0      |            | 0  |
| BM6                 |                                       |                         |                        | 0    | 0    | 0   | 0      |            | 0  |
| BM7                 |                                       |                         |                        | 0    | 0    | 0   | 0      |            | 0  |
| BM8                 |                                       |                         |                        | 0    | 0    | 0   | 0      |            | 0  |
| BM9                 |                                       |                         |                        | 0    | 0    | 0   | 0      |            | 0  |
| BM10                |                                       |                         |                        | 0    | 0    | 0   | 0      |            | 0  |
| BM11                |                                       |                         |                        | 0    | 0    | 0   | 0      |            | 0  |
| BM12                |                                       |                         |                        | 0    | 0    | 0   | 0      |            | 0  |
| BM13                |                                       |                         |                        | 0    | 0    | 0   | 0      |            | 0  |
| BM14                |                                       |                         |                        | 0    | 0    | 0   | 0      |            | 0  |
| BM15                |                                       |                         |                        | 0    | 0    | 0   | 0      |            | 0  |
| BM16                |                                       |                         |                        | 0    | 0    | 0   | 0      |            | 0  |
| BM17                |                                       |                         |                        | 0    | 0    | 0   | 0      |            | 0  |
| BM18                |                                       |                         |                        | 0    | 0    | 0   | 0      |            | 0  |
| BM19                |                                       |                         |                        | 0    | 0    | 0   | 0      |            | 0  |
| BM20                |                                       |                         |                        | 0    | 0    | 0   | 0      |            | 0  |
| BM21                |                                       |                         |                        | 0    | 0    | 0   | 0      |            | 0  |
| BM22                |                                       |                         |                        | 0    | 0    | 0   | 0      |            | 0  |
| BM23                |                                       |                         |                        | 0    | 0    | 0   | 0      |            | 0  |
| BM24                |                                       |                         |                        | 0    | 0    | 0   | 0      |            | 0  |
| BM25                |                                       |                         |                        | 0    | 0    | 0   | 0      |            | 0  |
| BM26                |                                       |                         |                        | 0    | 0    | 0   | 0      |            | 0  |
| BM27                |                                       |                         |                        | 0    | 0    | 0   | 0      |            | 0  |
| BM28                |                                       |                         |                        | 0    | 0    | 0   | 0      |            | 0  |
| BM29                |                                       |                         |                        | 0    | 0    | 0   | 0      |            | 0  |
| BM30                |                                       |                         |                        | 0    | 0    | 0   | 0      |            | 0  |
| BM31                |                                       |                         |                        | 0    | 0    | 0   | 0      |            | 0  |
| BM32                |                                       |                         |                        | 0    | 0    | 0   | 0      |            | 0  |
| BM33                |                                       |                         |                        | 0    | 0    | 0   | 0      |            | 0  |
| BM34                |                                       |                         |                        | 0    | 0    | 0   | 0      |            | 0  |
| BM35                |                                       |                         |                        | 0    | 0    | 0   | 0      |            | 0  |
| BM36                |                                       |                         |                        | 0    | 0    | 0   | 0      |            | 0  |
| BM37                |                                       |                         |                        | 0    | 0    | 0   | 0      |            | 0  |
| BM38                |                                       |                         |                        | 0    | 0    | 0   | 0      |            | 0  |
| BM89                |                                       |                         |                        | 0    | 0    | 0   | 0      |            | 0  |
| BM90                |                                       |                         |                        | 0    | 0    | 0   | 0      |            | 0  |

| and cSSRs extracted |                                       |                         |                        |      |      |     |        |            |    |
|---------------------|---------------------------------------|-------------------------|------------------------|------|------|-----|--------|------------|----|
| Genome Serial       | putative protein 2/putative protein 3 | agnoprotein 1a/1b/2a/2b | Cys-pro leader peptide | ORF1 | ORF2 | MCP | VP2/HP | VP1/VP2/HP | HP |
| No.                 |                                       |                         |                        |      |      |     |        |            |    |
| BM91                |                                       |                         |                        | 0    | 0    | 0   | 0      |            | 0  |
| BM92                |                                       |                         |                        | 0    | 0    | 0   | 0      |            | 0  |
| BM93                |                                       |                         |                        | 0    | 0    | 0   | 0      |            | 0  |
| BM94                |                                       |                         |                        | 0    | 0    | 0   | 0      |            | 0  |
| BM39                |                                       |                         |                        | 0    | 0    | 0   | 0      |            | 0  |
| BM40                |                                       |                         |                        | 0    | 0    | 0   | 0      |            | 0  |
| BM41                |                                       |                         |                        | 0    | 0    | 0   | 0      |            | 0  |
| BM42                |                                       |                         |                        | 0    | 0    | 0   | 0      |            | 0  |
| BM43                |                                       |                         |                        | 0    | 0    | 0   | 0      |            | 0  |
| BM44                |                                       |                         |                        | 0    | 0    | 0   | 0      |            | 0  |
| BM45                |                                       |                         |                        | 0    | 0    | 0   | 0      |            | 0  |
| BM46                |                                       |                         |                        | 0    | 0    | 0   | 0      |            | 0  |
| BM47                |                                       |                         |                        | 0    | 0    | 0   | 0      |            | 0  |
| BM48                |                                       |                         |                        | 0    | 0    | 0   | 0      |            | 0  |
| BM49                |                                       |                         |                        | 0    | 0    | 0   | 0      |            | 32 |
| BM50                |                                       |                         |                        | 0    | 0    | 0   | 0      |            | 0  |
| BM51                |                                       |                         |                        | 0    | 0    | 0   | 0      |            | 0  |
| BM52                |                                       |                         |                        | 0    | 0    | 0   | 0      |            | 0  |
| BM53                |                                       |                         |                        | 0    | 0    | 0   | 0      |            | 0  |
| BM54                |                                       |                         |                        | 0    | 0    | 0   | 0      | 2          | 1  |
| BM55                |                                       |                         |                        | 0    | 0    | 0   | 0      |            | 0  |
| BM56                |                                       |                         |                        | 0    | 0    | 0   | 0      |            | 0  |
| BM57                |                                       |                         |                        | 0    | 0    | 0   | 0      |            | 0  |
| BM58                |                                       |                         |                        | 0    | 0    | 0   | 0      |            | 0  |
| BM59                |                                       |                         |                        | 0    | 0    | 0   | 0      |            | 0  |
| BM60                |                                       |                         |                        | 0    | 0    | 0   | 0      |            | 0  |
| BM61                |                                       |                         |                        | 0    | 0    | 0   | 0      |            | 0  |
| BM62                |                                       |                         |                        | 0    | 0    | 0   | 0      |            | 0  |
| BM64                |                                       |                         |                        | 0    | 0    | 0   | 0      |            | 0  |
| BM65                |                                       |                         |                        | 0    | 0    | 0   | 0      |            | 0  |
| BM66                |                                       |                         |                        | 0    | 0    | 0   | 0      |            | 0  |
| BM67                |                                       |                         |                        | 0    | 0    | 0   | 0      |            | 0  |
| BM68                |                                       |                         |                        | 0    | 0    | 0   | 0      |            | 0  |
| BM69                |                                       |                         |                        | 0    | 0    | 0   | 0      |            | 0  |
| BM70                |                                       |                         |                        | 0    | 0    | 0   | 0      |            | 0  |
| BM95                |                                       |                         |                        | 0    | 0    | 0   | 0      |            | 0  |
| BM96                |                                       |                         |                        | 0    | 0    | 0   | 0      |            | 0  |
| BM71                |                                       |                         |                        | 0    | 0    | 0   | 0      |            | 0  |
| BM72                |                                       |                         |                        | 0    | 0    | 0   | 0      |            | 0  |

| and cSSRs extracted | putative protein 2/putative protein 3 | agnoprotein 1a/1b/2a/2b | Cys-pro leader peptide | ORF1 | ORF2 | MCP | VP2/HP | VP1/VP2/HP | HP |
|---------------------|---------------------------------------|-------------------------|------------------------|------|------|-----|--------|------------|----|
| Genome Serial No.   |                                       |                         |                        |      |      |     |        |            |    |
| BM73                |                                       |                         |                        | 0    | 0    | 0   | 0      |            | 0  |
| BM74                |                                       |                         |                        | 0    | 0    | 0   | 0      |            | 0  |
| BM75                | 1                                     |                         |                        | 0    | 0    | 0   | 0      |            | 0  |
| BM76                |                                       | 1                       |                        | 0    | 0    | 0   | 0      |            | 0  |
| BM77                |                                       |                         |                        | 0    | 0    | 0   | 0      |            | 0  |
| BM78                |                                       |                         |                        | 0    | 0    | 0   | 0      |            | 0  |
| BM79                |                                       |                         |                        | 0    | 0    | 0   | 0      |            | 0  |
| BM80                |                                       |                         |                        | 0    | 0    | 0   | 0      |            | 0  |
| BM81                |                                       |                         |                        | 0    | 0    | 0   | 0      |            | 0  |
| BM82                |                                       |                         |                        | 0    | 0    | 0   | 0      |            | 0  |
| BM83                |                                       |                         |                        | 0    | 0    | 0   | 0      |            | 0  |
| BM84                |                                       |                         |                        | 0    | 0    | 0   | 0      |            | 0  |
| BM85                |                                       |                         |                        | 0    | 0    | 0   | 0      |            | 0  |
| BM86                |                                       |                         |                        | 0    | 0    | 0   | 0      |            | 0  |
| BM87                |                                       |                         |                        | 0    | 0    | 0   | 0      |            | 0  |
| BM88                |                                       |                         |                        | 1    | 0    | 0   | 0      |            | 0  |
| BM97                |                                       |                         |                        | 0    | 0    | 0   | 0      |            | 0  |
| BM98                |                                       |                         |                        | 0    | 0    | 0   | 8      |            | 0  |
| BM99                |                                       |                         |                        | 0    | 5    | 2   | 0      |            | 0  |
| BM100               |                                       |                         |                        | 0    | 0    | 0   | 0      |            | 0  |

and cSSRs extrac

| Genome Serial | FINAL PROTEIN TOTAL | MONO NCS | DI NCS | TRI NCS | TETRA NCS | PENTA NCS | HEXA NCS | NCS Total |
|---------------|---------------------|----------|--------|---------|-----------|-----------|----------|-----------|
| No.           |                     |          |        |         |           |           |          |           |
| BM2           | 21 5                | 2        | 2      | 0       | 0         | 0         | 0        | 9         |
| BM3           | 22 6                | 1        | 1      | 0       | 0         | 0         | 1        | 9         |
| BM4           | 26 7                | 4        | 0      | 0       | 0         | 0         | 0        | 11        |
| BM5           | 17 3                | 4        | 0      | 0       | 0         | 0         | 0        | 7         |
| BM6           | 22 5                | 2        | 1      | 0       | 0         | 0         | 0        | 8         |
| BM7           | 23 7                | 2        | 3      | 0       | 0         | 0         | 0        | 12        |
| BM8           | 26 1                | 1        | 1      | 0       | 0         | 0         | 1        | 4         |
| BM9           | 27 2                | 1        | 1      | 0       | 0         | 0         | 0        | 4         |
| BM10          | 18 3                | 3        | 2      | 0       | 0         | 0         | 0        | 8         |
| BM11          | 26 6                | 2        | 2      | 0       | 0         | 0         | 0        | 10        |
| BM12          | 26 6                | 2        | 2      | 0       | 0         | 0         | 0        | 10        |
| BM13          | 23 6                | 1        | 1      | 0       | 1         | 0         | 0        | 9         |
| BM14          | 27 4                | 2        | 1      | 1       | 0         | 0         | 0        | 8         |
| BM15          | 17 6                | 1        | 1      | 0       | 0         | 0         | 0        | 8         |
| BM16          | 27 1                | 2        | 0      | 0       | 0         | 0         | 0        | 3         |
| BM17          | 29 2                | 2        | 1      | 0       | 1         | 0         | 0        | 6         |
| BM18          | 27 5                | 1        | 1      | 0       | 0         | 0         | 1        | 8         |
| BM19          | 17 3                | 2        | 1      | 1       | 0         | 0         | 0        | 7         |
| BM20          | 21 3                | 2        | 1      | 2       | 0         | 0         | 0        | 8         |
| BM21          | 16 1                | 1        | 0      | 0       | 0         | 0         | 0        | 2         |
| BM22          | 28 7                | 1        | 1      | 0       | 0         | 0         | 0        | 9         |
| BM23          | 18 4                | 0        | 3      | 1       | 0         | 0         | 0        | 8         |
| BM24          | 30 1                | 1        | 1      | 1       | 0         | 0         | 0        | 4         |
| BM25          | 26 7                | 2        | 2      | 0       | 0         | 0         | 0        | 11        |
| BM26          | 24 7                | 1        | 0      | 0       | 0         | 0         | 0        | 8         |
| BM27          | 32 5                | 0        | 2      | 0       | 0         | 0         | 0        | 7         |
| BM28          | 26 7                | 0        | 1      | 0       | 0         | 0         | 0        | 8         |
| BM29          | 30 3                | 3        | 0      | 0       | 0         | 0         | 0        | 6         |
| BM30          | 28 2                | 2        | 0      | 0       | 0         | 0         | 0        | 4         |
| BM31          | 28 2                | 0        | 1      | 0       | 0         | 0         | 0        | 3         |
| BM32          | 24 1                | 1        | 0      | 0       | 0         | 0         | 0        | 2         |
| BM33          | 26 1                | 1        | 1      | 0       | 0         | 0         | 0        | 3         |
| BM34          | 26 4                | 1        | 2      | 3       | 0         | 0         | 0        | 10        |
| BM35          | 17 4                | 1        | 0      | 0       | 0         | 0         | 0        | 5         |
| BM36          | 23 6                | 1        | 2      | 0       | 0         | 0         | 0        | 9         |
| BM37          | 20 3                | 7        | 1      | 0       | 0         | 0         | 0        | 11        |
| BM38          | 15 3                | 3        | 1      | 0       | 0         | 0         | 0        | 7         |
| BM89          | 25 6                | 1        | 1      | 1       | 0         | 0         | 0        | 9         |
| BM90          | 23 7                | 2        | 0      | 0       | 0         | 0         | 0        | 9         |

and cSSRs extrac

| Genome Serial<br>No. | FINAL PROTEIN TOTAL | MONO NCS | DI NCS | TRI NCS | TETRA NCS | PENTA NCS | HEXA NCS | NCS Total |
|----------------------|---------------------|----------|--------|---------|-----------|-----------|----------|-----------|
| BM91                 | 22 6                | 1        | 0      | 0       | 0         | 0         | 0        | 7         |
| BM92                 | 21 1                | 2        | 2      | 0       | 0         | 0         | 0        | 5         |
| BM93                 | 17 4                | 0        | 2      | 0       | 0         | 0         | 0        | 6         |
| BM94                 | 18 2                | 3        | 3      | 0       | 0         | 0         | 0        | 8         |
| BM39                 | 32 5                | 1        | 1      | 1       | 0         | 0         | 0        | 8         |
| BM40                 | 31 7                | 4        | 2      | 1       | 0         | 0         | 0        | 14        |
| BM41                 | 31 2                | 3        | 2      | 1       | 0         | 0         | 0        | 8         |
| BM42                 | 29 4                | 1        | 0      | 0       | 0         | 0         | 0        | 5         |
| BM43                 | 22 5                | 0        | 2      | 1       | 0         | 0         | 0        | 8         |
| BM44                 | 21 5                | 1        | 1      | 0       | 0         | 0         | 0        | 7         |
| BM45                 | 24 4                | 2        | 1      | 0       | 0         | 0         | 0        | 7         |
| BM46                 | 31 5                | 1        | 0      | 0       | 0         | 0         | 0        | 6         |
| BM47                 | 27 2                | 4        | 2      | 0       | 0         | 0         | 0        | 8         |
| BM48                 | 28 3                | 1        | 1      | 0       | 0         | 0         | 0        | 5         |
| BM49                 | 32 5                | 2        | 0      | 0       | 0         | 0         | 0        | 7         |
| BM50                 | 30 3                | 5        | 0      | 0       | 0         | 0         | 0        | 8         |
| BM51                 | 24 2                | 0        | 0      | 0       | 0         | 0         | 0        | 2         |
| BM52                 | 27 5                | 1        | 1      | 0       | 0         | 0         | 0        | 7         |
| BM53                 | 22 6                | 3        | 0      | 1       | 0         | 0         | 0        | 10        |
| BM54                 | 34 2                | 1        | 1      | 0       | 0         | 0         | 0        | 4         |
| BM55                 | 24 2                | 1        | 0      | 0       | 0         | 0         | 0        | 3         |
| BM56                 | 17 3                | 2        | 0      | 0       | 0         | 0         | 0        | 5         |
| BM57                 | 24 0                | 1        | 0      | 0       | 0         | 0         | 0        | 1         |
| BM58                 | 22 4                | 4        | 0      | 1       | 0         | 0         | 0        | 9         |
| BM59                 | 11 4                | 3        | 1      | 0       | 0         | 0         | 0        | 8         |
| BM60                 | 18 4                | 2        | 0      | 0       | 0         | 0         | 0        | 6         |
| BM61                 | 21 4                | 1        | 2      | 0       | 0         | 0         | 0        | 7         |
| BM62                 | 29 3                | 0        | 0      | 0       | 0         | 0         | 0        | 3         |
| BM64                 | 27 3                | 3        | 0      | 1       | 0         | 0         | 1        | 8         |
| BM65                 | 37 6                | 1        | 2      | 1       | 0         | 0         | 0        | 10        |
| BM66                 | 19 4                | 1        | 1      | 0       | 0         | 0         | 0        | 6         |
| BM67                 | 33 5                | 1        | 1      | 0       | 0         | 0         | 0        | 7         |
| BM68                 | 38 4                | 2        | 1      | 0       | 1         | 0         | 0        | 8         |
| BM69                 | 32 3                | 1        | 1      | 0       | 0         | 0         | 0        | 5         |
| BM70                 | 25 5                |          | 2      | 0       | 0         | 0         | 0        | 7         |
| BM95                 | 33 2                | 2        | 0      | 0       | 0         | 0         | 0        | 4         |
| BM96                 | 19 4                | 1        | 0      | 0       | 0         | 0         | 0        | 5         |
| BM71                 | 20 2                | 1        | 1      | 0       | 1         | 0         | 0        | 5         |
| BM72                 | 25 1                | 4        | 1      | 0       | 0         | 0         | 0        | 6         |

and cSSRs extrac

| Genome Serial | FINAL PROTEIN TOTAL | MONO NCS | DI NCS | TRI NCS | TETRA NCS | PENTA NCS | HEXA NCS | NCS Total |
|---------------|---------------------|----------|--------|---------|-----------|-----------|----------|-----------|
| BM73          | 24 1                | 1        | 0      | 0       | 0         | 0         | 0        | 2         |
| BM74          | 22 1                | 3        | 0      | 0       | 0         | 0         | 0        | 4         |
| BM75          | 13 3                | 5        | 0      | 0       | 0         | 0         | 0        | 8         |
| BM76          | 18 2                | 1        | 0      | 0       | 0         | 0         | 0        | 3         |
| BM77          | 19 2                | 3        | 0      | 0       | 0         | 0         | 0        | 5         |
| BM78          | 15 2                | 3        | 1      | 0       | 0         | 0         | 0        | 6         |
| BM79          | 27 1                | 4        | 0      | 1       | 0         | 0         | 0        | 6         |
| BM80          | 13 1                | 1        | 3      | 0       | 0         | 0         | 0        | 5         |
| BM81          | 17 2                | 1        | 0      | 0       | 0         | 0         | 0        | 3         |
| BM82          | 17 1                | 1        | 2      | 0       | 0         | 0         | 0        | 4         |
| BM83          | 21 4                | 3        | 1      | 0       | 0         | 0         | 0        | 8         |
| BM84          | 25 1                | 5        | 0      | 0       | 0         | 0         | 0        | 6         |
| BM85          | 37 17               | 2        | 0      | 0       | 0         | 0         | 0        | 19        |
| BM86          | 21 2                | 4        | 0      | 0       | 0         | 0         | 0        | 6         |
| BM87          | 17 1                | 2        | 1      | 0       | 0         | 0         | 0        | 4         |
| BM88          | 21 16               | 2        | 0      | 0       | 0         | 0         | 0        | 18        |
| BM97          | 30 3                | 5        | 0      | 0       | 0         | 0         | 0        | 8         |
| BM98          | 26 3                | 2        | 0      | 0       | 0         | 0         | 0        | 5         |
| BM99          | 35 6                | 4        | 0      | 0       | 0         | 0         | 0        | 10        |
| BM100         | 15 9                | 1        | 1      | 0       | 0         | 0         | 1        | 12        |

**S3: Raw data for distribution of SSRs found in the Polyomaviridae genomes.**

**Genome**

**Serial No.**

| BM2 | S.No | Consensus | Rep. Size | Iterations | Tract-size | Start | End  | Protein  |
|-----|------|-----------|-----------|------------|------------|-------|------|----------|
|     | 1    | A         | 1         | 6          | 6          | 23    | 28   | NCS      |
|     | 2    | CCT       | 3         | 3          | 10         | 137   | 146  | NCS      |
|     | 3    | A         | 1         | 8          | 8          | 198   | 205  | NCS      |
|     | 4    | T         | 1         | 6          | 6          | 490   | 495  | NCS      |
|     | 5    | CTG       | 3         | 3          | 9          | 672   | 680  | VP2      |
|     | 6    | AT        | 2         | 3          | 6          | 988   | 993  | VP2      |
|     | 7    | AG        | 2         | 3          | 6          | 1010  | 1015 | VP2      |
|     | 8    | C         | 1         | 6          | 6          | 1224  | 1229 | NCS      |
|     | 9    | A         | 1         | 6          | 6          | 1398  | 1403 | NCS      |
|     | 10   | AGA       | 3         | 4          | 12         | 1405  | 1416 | NCS      |
|     | 11   | G         | 1         | 7          | 7          | 1527  | 1533 | VP1      |
|     | 12   | A         | 1         | 6          | 6          | 1841  | 1846 | VP1      |
|     | 13   | AC        | 2         | 3          | 6          | 1995  | 2000 | VP1      |
|     | 14   | TG        | 2         | 3          | 6          | 2235  | 2240 | VP1      |
|     | 15   | CA        | 2         | 3          | 6          | 2522  | 2527 | VP1      |
|     | 16   | AG        | 2         | 3          | 6          | 2584  | 2589 | NCS      |
|     | 17   | TTC       | 3         | 3          | 9          | 2676  | 2684 | LTA      |
|     | 18   | T         | 1         | 7          | 7          | 3052  | 3058 | LTA      |
|     | 19   | T         | 1         | 6          | 6          | 3331  | 3336 | LTA      |
|     | 20   | CT        | 2         | 3          | 6          | 3504  | 3509 | LTA      |
|     | 21   | AC        | 2         | 3          | 6          | 3567  | 3572 | LTA      |
|     | 22   | AGT       | 3         | 4          | 11         | 4071  | 4081 | LTA      |
|     | 23   | G         | 1         | 8          | 8          | 4194  | 4201 | LTA      |
|     | 24   | G         | 1         | 12         | 12         | 4226  | 4237 | LTA      |
|     | 25   | CT        | 2         | 3          | 6          | 4344  | 4349 | NCS      |
|     | 26   | CT        | 2         | 3          | 6          | 4562  | 4567 | STA      |
|     | 27   | TG        | 2         | 3          | 6          | 4572  | 4577 | STA      |
|     | 28   | T         | 1         | 6          | 6          | 4646  | 4651 | STA      |
|     | 29   | AC        | 2         | 3          | 6          | 4691  | 4696 | STA      |
|     | 30   | TC        | 2         | 3          | 6          | 4829  | 4834 | STA, LTA |

**BM3**

| S.No | Consensus | Rep. Size | Iterations | Tract-size | Start | End  | Protein  |
|------|-----------|-----------|------------|------------|-------|------|----------|
| 1    | CCT       | 3         | 3          | 10         | 67    | 76   | NCS      |
| 2    | A         | 1         | 6          | 6          | 125   | 130  | NCS      |
| 3    | A         | 1         | 10         | 10         | 302   | 311  | NCS      |
| 4    | GA        | 2         | 3          | 6          | 422   | 427  | NCS      |
| 5    | CTG       | 3         | 3          | 10         | 1105  | 1114 | VP2      |
| 6    | A         | 1         | 6          | 6          | 1359  | 1364 | VP1      |
| 7    | G         | 1         | 6          | 6          | 1661  | 1666 | VP1      |
| 8    | G         | 1         | 6          | 6          | 1699  | 1704 | VP1      |
| 9    | A         | 1         | 6          | 6          | 2299  | 2304 | VP1      |
| 10   | C         | 1         | 7          | 7          | 2308  | 2314 | VP1      |
| 11   | C         | 1         | 6          | 6          | 2409  | 2414 | NCS      |
| 12   | T         | 1         | 6          | 6          | 2472  | 2477 | NCS      |
| 13   | TTCATC    | 6         | 3          | 18         | 2497  | 2514 | LTA      |
| 14   | T         | 1         | 6          | 6          | 2724  | 2729 | LTA      |
| 15   | T         | 1         | 8          | 8          | 2866  | 2873 | LTA      |
| 16   | AATAT     | 5         | 3          | 15         | 3178  | 3192 | LTA      |
| 17   | A         | 1         | 6          | 6          | 3295  | 3300 | LTA      |
| 18   | TCT       | 3         | 4          | 12         | 3803  | 3814 | LTA      |
| 19   | AG        | 2         | 3          | 6          | 3946  | 3951 | LTA      |
| 20   | T         | 1         | 6          | 6          | 3983  | 3988 | LTA      |
| 21   | G         | 1         | 6          | 6          | 4183  | 4188 | LTA      |
| 22   | TCT       | 3         | 4          | 12         | 4271  | 4282 | LTA      |
| 23   | CT        | 2         | 3          | 6          | 4363  | 4368 | LTA      |
| 24   | T         | 1         | 7          | 7          | 4444  | 4450 | NCS      |
| 25   | A         | 1         | 6          | 6          | 4462  | 4467 | NCS      |
| 26   | TGCAAG    | 6         | 3          | 18         | 4671  | 4688 | NCS      |
| 27   | AATTC     | 5         | 3          | 14         | 4814  | 4827 | LTA, STA |
| 28   | T         | 1         | 6          | 6          | 4866  | 4871 | LTA, STA |
| 29   | C         | 1         | 6          | 6          | 4879  | 4884 | LTA, STA |
| 30   | CT        | 2         | 3          | 6          | 4911  | 4916 | LTA, STA |
| 31   | TC        | 2         | 4          | 8          | 4990  | 4997 | LTA, STA |

**BM4**

| S.No | Consensus | Rep. Size | Iterations | Tract-size | Start | End | Protein |
|------|-----------|-----------|------------|------------|-------|-----|---------|
| 1    | CT        | 2         | 3          | 6          | 1     | 6   | NCS     |

|        |   |    |    |      |               |
|--------|---|----|----|------|---------------|
| 2 T    | 1 | 6  | 6  | 6    | 11 NCS        |
| 3 GC   | 2 | 3  | 6  | 84   | 89 NCS        |
| 4 CT   | 2 | 3  | 6  | 136  | 141 NCS       |
| 5 A    | 1 | 8  | 8  | 152  | 159 NCS       |
| 6 GT   | 2 | 3  | 6  | 328  | 333 NCS       |
| 7 T    | 1 | 7  | 7  | 405  | 411 NCS       |
| 8 A    | 1 | 7  | 7  | 432  | 438 NCS       |
| 9 T    | 1 | 7  | 7  | 683  | 689 NCS       |
| 10 T   | 1 | 7  | 7  | 691  | 697 NCS       |
| 11 CT  | 2 | 6  | 11 | 865  | 875 VP2       |
| 12 AT  | 2 | 3  | 6  | 1093 | 1098 VP2, VP3 |
| 13 T   | 1 | 6  | 6  | 1293 | 1298 VP2, VP3 |
| 14 TC  | 2 | 3  | 6  | 1318 | 1323 VP2, VP3 |
| 15 AGA | 3 | 4  | 12 | 1595 | 1606 VP2, VP3 |
| 16 A   | 1 | 7  | 7  | 1990 | 1996 VP1      |
| 17 CA  | 2 | 3  | 6  | 2101 | 2106 VP1      |
| 18 AAT | 3 | 4  | 11 | 2419 | 2429 VP1      |
| 19 AG  | 2 | 3  | 6  | 2474 | 2479 VP1      |
| 20 A   | 1 | 6  | 6  | 2687 | 2692 VP1      |
| 21 A   | 1 | 6  | 6  | 2749 | 2754 LTA      |
| 22 AGG | 3 | 5  | 15 | 2893 | 2907 LTA      |
| 23 CT  | 2 | 3  | 6  | 3013 | 3018 LTA      |
| 24 TC  | 2 | 3  | 6  | 3025 | 3030 LTA      |
| 25 G   | 1 | 6  | 6  | 3263 | 3268 LTA      |
| 26 AT  | 2 | 3  | 6  | 3665 | 3670 LTA      |
| 27 T   | 1 | 7  | 7  | 3783 | 3789 LTA      |
| 28 T   | 1 | 6  | 6  | 4332 | 4337 LTA      |
| 29 TAG | 3 | 4  | 11 | 4341 | 4351 LTA      |
| 30 CA  | 2 | 3  | 6  | 4366 | 4371 LTA      |
| 31 TC  | 2 | 3  | 6  | 4550 | 4555 LTA      |
| 32 A   | 1 | 10 | 10 | 4596 | 4605 NCS      |
| 33 TC  | 2 | 3  | 6  | 4686 | 4691 STA      |
| 34 GCA | 3 | 4  | 12 | 4846 | 4857 STA      |
| 35 GA  | 2 | 3  | 6  | 4920 | 4925 STA      |
| 36 AG  | 2 | 3  | 6  | 5118 | 5123 LTA, STA |
| 37 CT  | 2 | 3  | 6  | 5164 | 5169 LTA, STA |

#### BM5

| S.No   | Consensus Rep. | Size | Iterations | Tract-size | Start         | End | Protein |
|--------|----------------|------|------------|------------|---------------|-----|---------|
| 1 TG   | 2              | 3    | 6          | 6          | 11 NCS        |     |         |
| 2 T    | 1              | 12   | 12         | 96         | 107 NCS       |     |         |
| 3 CT   | 2              | 5    | 10         | 163        | 172 NCS       |     |         |
| 4 AG   | 2              | 3    | 6          | 186        | 191 NCS       |     |         |
| 5 A    | 1              | 8    | 8          | 221        | 228 NCS       |     |         |
| 6 CG   | 2              | 4    | 8          | 478        | 485 NCS       |     |         |
| 7 T    | 1              | 6    | 6          | 509        | 514 NCS       |     |         |
| 8 T    | 1              | 6    | 6          | 550        | 555 VP2       |     |         |
| 9 GTAT | 4              | 3    | 11         | 731        | 741 VP2       |     |         |
| 10 AT  | 2              | 3    | 6          | 869        | 874 VP2       |     |         |
| 11 GA  | 2              | 3    | 6          | 1026       | 1031 VP2      |     |         |
| 12 AG  | 2              | 3    | 6          | 1060       | 1065 VP2      |     |         |
| 13 GT  | 2              | 3    | 6          | 1339       | 1344 VP2      |     |         |
| 14 CA  | 2              | 3    | 6          | 2421       | 2426 VP1      |     |         |
| 15 C   | 1              | 7    | 7          | 2821       | 2827 LTA      |     |         |
| 16 T   | 1              | 7    | 7          | 3186       | 3192 LTA      |     |         |
| 17 T   | 1              | 7    | 7          | 3203       | 3209 LTA      |     |         |
| 18 AT  | 2              | 3    | 6          | 3471       | 3476 LTA      |     |         |
| 19 T   | 1              | 7    | 7          | 3480       | 3486 LTA      |     |         |
| 20 T   | 1              | 7    | 7          | 3804       | 3810 LTA      |     |         |
| 21 CA  | 2              | 3    | 6          | 4008       | 4013 LTA      |     |         |
| 22 G   | 1              | 8    | 8          | 4345       | 4352 LTA      |     |         |
| 23 AC  | 2              | 3    | 6          | 4846       | 4851 STA      |     |         |
| 24 T   | 1              | 7    | 7          | 5162       | 5168 LTA, STA |     |         |

#### BM6

| S.No  | Consensus Rep. | Size | Iterations | Tract-size | Start   | End | Protein |
|-------|----------------|------|------------|------------|---------|-----|---------|
| 1 AG  | 2              | 3    | 6          | 49         | 54 NCS  |     |         |
| 2 CCT | 3              | 3    | 10         | 94         | 103 NCS |     |         |
| 3 CT  | 2              | 4    | 8          | 141        | 148 NCS |     |         |
| 4 A   | 1              | 12   | 12         | 153        | 164 NCS |     |         |
| 5 T   | 1              | 7    | 7          | 278        | 284 NCS |     |         |
| 6 T   | 1              | 8    | 8          | 323        | 330 NCS |     |         |
| 7 T   | 1              | 7    | 7          | 369        | 375 NCS |     |         |

|           |   |    |    |      |          |
|-----------|---|----|----|------|----------|
| 8 T       | 1 | 9  | 9  | 414  | 422 NCS  |
| 9 G       | 1 | 6  | 6  | 427  | 432 VP2  |
| 10 ACT    | 3 | 4  | 12 | 479  | 490 VP2  |
| 11 CT     | 2 | 3  | 6  | 512  | 517 VP2  |
| 12 TC     | 2 | 3  | 6  | 1485 | 1490 VP1 |
| 13 A      | 1 | 6  | 6  | 1784 | 1789 VP1 |
| 14 AT     | 2 | 3  | 6  | 2189 | 2194 VP1 |
| 15 CCCCAG | 6 | 4  | 24 | 2328 | 2351 VP1 |
| 16 CTC    | 3 | 4  | 13 | 2377 | 2389 VP1 |
| 17 CTC    | 3 | 8  | 24 | 2443 | 2466 VP1 |
| 18 T      | 1 | 6  | 6  | 2706 | 2711 LTA |
| 19 T      | 1 | 6  | 6  | 2949 | 2954 LTA |
| 20 GA     | 2 | 3  | 6  | 3359 | 3364 LTA |
| 21 ACT    | 3 | 4  | 12 | 3558 | 3569 LTA |
| 22 A      | 1 | 6  | 6  | 3959 | 3964 LTA |
| 23 TA     | 2 | 4  | 8  | 3986 | 3993 LTA |
| 24 AT     | 2 | 3  | 6  | 4379 | 4384 LTA |
| 25 C      | 1 | 8  | 8  | 4570 | 4577 LTA |
| 26 TGC    | 3 | 4  | 12 | 4654 | 4665 LTA |
| 27 TCT    | 3 | 4  | 12 | 4714 | 4725 LTA |
| 28 T      | 1 | 6  | 6  | 4856 | 4861 STA |
| 29 CA     | 2 | 3  | 6  | 5014 | 5019 STA |
| 30 T      | 1 | 10 | 10 | 5030 | 5039 STA |

### BM7

| S.No      | Consensus Rep. | Size | Iterations | Tract-size | Start         | End | Protein |
|-----------|----------------|------|------------|------------|---------------|-----|---------|
| 1 A       | 1              | 6    | 6          | 20         | 25 NCS        |     |         |
| 2 TA      | 2              | 3    | 6          | 37         | 42 NCS        |     |         |
| 3 GC      | 2              | 3    | 6          | 53         | 58 NCS        |     |         |
| 4 CCT     | 3              | 3    | 10         | 82         | 91 NCS        |     |         |
| 5 A       | 1              | 9    | 9          | 141        | 149 NCS       |     |         |
| 6 T       | 1              | 8    | 8          | 243        | 250 NCS       |     |         |
| 7 T       | 1              | 7    | 7          | 297        | 303 NCS       |     |         |
| 8 AGG     | 3              | 3    | 10         | 313        | 322 NCS       |     |         |
| 9 T       | 1              | 6    | 6          | 341        | 346 NCS       |     |         |
| 10 AATTT  | 5              | 3    | 14         | 970        | 983 VP2       |     |         |
| 11 A      | 1              | 6    | 6          | 1061       | 1066 VP2      |     |         |
| 12 A      | 1              | 7    | 7          | 1103       | 1109 VP2, VP1 |     |         |
| 13 CTAC   | 4              | 3    | 12         | 1403       | 1414 VP1      |     |         |
| 14 AT     | 2              | 3    | 6          | 2227       | 2232 VP1      |     |         |
| 15 CTC    | 3              | 5    | 15         | 2424       | 2438 VP1      |     |         |
| 16 CTC    | 3              | 4    | 13         | 2460       | 2472 VP1      |     |         |
| 17 A      | 1              | 6    | 6          | 2541       | 2546 NCS      |     |         |
| 18 A      | 1              | 6    | 6          | 2564       | 2569 NCS      |     |         |
| 19 ATTTCC | 6              | 3    | 19         | 2575       | 2593 LTA      |     |         |
| 20 TCT    | 3              | 4    | 12         | 2594       | 2605 LTA      |     |         |
| 21 TCT    | 3              | 5    | 15         | 2609       | 2623 LTA      |     |         |
| 22 T      | 1              | 6    | 6          | 2980       | 2985 LTA      |     |         |
| 23 AC     | 2              | 4    | 8          | 3103       | 3110 LTA      |     |         |
| 24 T      | 1              | 6    | 6          | 3260       | 3265 LTA      |     |         |
| 25 TG     | 2              | 3    | 6          | 3561       | 3566 LTA      |     |         |
| 26 T      | 1              | 6    | 6          | 3709       | 3714 LTA      |     |         |
| 27 GT     | 2              | 3    | 6          | 4091       | 4096 LTA      |     |         |
| 28 AGG    | 3              | 4    | 11         | 4138       | 4148 LTA      |     |         |
| 29 G      | 1              | 6    | 6          | 4169       | 4174 LTA      |     |         |
| 30 ATC    | 3              | 3    | 9          | 4339       | 4347 LTA      |     |         |
| 31 G      | 1              | 9    | 9          | 4351       | 4359 LTA      |     |         |
| 32 AT     | 2              | 3    | 6          | 4378       | 4383 LTA      |     |         |
| 33 TGC    | 3              | 9    | 27         | 4469       | 4495 LTA      |     |         |
| 34 TCC    | 3              | 4    | 12         | 4706       | 4717 NCS      |     |         |
| 35 T      | 1              | 7    | 7          | 5023       | 5029 STA      |     |         |

### BM8

| S.No     | Consensus Rep. | Size | Iterations | Tract-size | Start    | End | Protein |
|----------|----------------|------|------------|------------|----------|-----|---------|
| 1 CT     | 2              | 3    | 6          | 54         | 59 NCS   |     |         |
| 2 CCT    | 3              | 3    | 10         | 62         | 71 NCS   |     |         |
| 3 A      | 1              | 9    | 9          | 121        | 129 NCS  |     |         |
| 4 TAATTT | 6              | 3    | 19         | 372        | 390 NCS  |     |         |
| 5 CT     | 2              | 3    | 6          | 411        | 416 VP2  |     |         |
| 6 TC     | 2              | 3    | 6          | 528        | 533 VP2  |     |         |
| 7 A      | 1              | 6    | 6          | 1114       | 1119 VP1 |     |         |
| 8 A      | 1              | 8    | 8          | 1261       | 1268 VP1 |     |         |
| 9 G      | 1              | 7    | 7          | 1549       | 1555 VP1 |     |         |

|         |   |   |    |      |      |          |
|---------|---|---|----|------|------|----------|
| 10 A    | 1 | 6 | 6  | 2007 | 2012 | VP1      |
| 11 GCA  | 3 | 4 | 12 | 2221 | 2232 | VP1      |
| 12 AAAT | 4 | 3 | 12 | 2279 | 2290 | VP1      |
| 13 TC   | 2 | 3 | 6  | 2534 | 2539 | VP1      |
| 14 T    | 1 | 6 | 6  | 2705 | 2710 | LTA      |
| 15 G    | 1 | 6 | 6  | 2952 | 2957 | LTA      |
| 16 TC   | 2 | 3 | 6  | 3025 | 3030 | LTA      |
| 17 CA   | 2 | 3 | 6  | 3111 | 3116 | LTA      |
| 18 AT   | 2 | 3 | 6  | 3366 | 3371 | LTA      |
| 19 T    | 1 | 6 | 6  | 3506 | 3511 | LTA      |
| 20 A    | 1 | 8 | 8  | 3528 | 3535 | LTA      |
| 21 AC   | 2 | 5 | 10 | 3585 | 3594 | LTA      |
| 22 T    | 1 | 7 | 7  | 4119 | 4125 | LTA      |
| 23 CTT  | 3 | 5 | 14 | 4192 | 4205 | LTA      |
| 24 TC   | 2 | 3 | 6  | 4214 | 4219 | LTA      |
| 25 TC   | 2 | 3 | 6  | 4369 | 4374 | LTA      |
| 26 AGG  | 3 | 7 | 21 | 4376 | 4396 | LTA      |
| 27 CTA  | 3 | 3 | 10 | 4600 | 4609 | STA      |
| 28 T    | 1 | 7 | 7  | 4685 | 4691 | STA      |
| 29 T    | 1 | 6 | 6  | 5004 | 5009 | STA, LTA |
| 30 T    | 1 | 6 | 6  | 5136 | 5141 | STA, LTA |

### BM9

| S.No.   | Consensus Rep. | Size | Iterations | Tract-size | Start | End  | Protein       |
|---------|----------------|------|------------|------------|-------|------|---------------|
| 1 CT    |                | 2    | 4          | 8          | 114   | 121  | NCS           |
| 2 GAG   |                | 3    | 4          | 12         | 131   | 142  | NCS           |
| 3 A     |                | 1    | 6          | 6          | 175   | 180  | NCS           |
| 4 T     |                | 1    | 6          | 6          | 460   | 465  | NCS           |
| 5 G     |                | 1    | 6          | 6          | 493   | 498  | VP2           |
| 6 T     |                | 1    | 8          | 8          | 759   | 766  | VP2           |
| 7 AG    |                | 2    | 3          | 6          | 1265  | 1270 | VP2, VP3      |
| 8 AGA   |                | 3    | 4          | 13         | 1428  | 1440 | VP1, VP2, VP3 |
| 9 A     |                | 1    | 7          | 7          | 1476  | 1482 | VP1, VP2, VP3 |
| 10 GT   |                | 2    | 3          | 6          | 1865  | 1870 | VP1           |
| 11 T    |                | 1    | 6          | 6          | 2837  | 2842 | LTA           |
| 12 A    |                | 1    | 7          | 7          | 3186  | 3192 | LTA           |
| 13 T    |                | 1    | 7          | 7          | 3257  | 3263 | LTA           |
| 14 GGTT |                | 4    | 3          | 12         | 3265  | 3276 | LTA           |
| 15 TC   |                | 2    | 5          | 10         | 3365  | 3374 | LTA           |
| 16 T    |                | 1    | 7          | 7          | 3505  | 3511 | LTA           |
| 17 T    |                | 1    | 7          | 7          | 3586  | 3592 | LTA           |
| 18 CAA  |                | 3    | 3          | 10         | 3641  | 3650 | LTA           |
| 19 TA   |                | 2    | 3          | 6          | 3797  | 3802 | LTA           |
| 20 AT   |                | 2    | 3          | 6          | 4026  | 4031 | LTA           |
| 21 A    |                | 1    | 6          | 6          | 4033  | 4038 | LTA           |
| 22 ATAC |                | 4    | 3          | 12         | 4083  | 4094 | LTA           |
| 23 CTT  |                | 3    | 4          | 11         | 4110  | 4120 | LTA           |
| 24 G    |                | 1    | 6          | 6          | 4137  | 4142 | LTA           |
| 25 TCT  |                | 3    | 4          | 12         | 4213  | 4224 | LTA           |
| 26 AGG  |                | 3    | 5          | 15         | 4236  | 4250 | LTA           |
| 27 CT   |                | 2    | 3          | 6          | 4338  | 4343 | LTA           |
| 28 T    |                | 1    | 6          | 6          | 4640  | 4645 | STA           |
| 29 T    |                | 1    | 9          | 9          | 4649  | 4657 | STA           |
| 30 T    |                | 1    | 6          | 6          | 4746  | 4751 | STA           |
| 31 A    |                | 1    | 7          | 7          | 4803  | 4809 | STA           |

### BM10

| Sl.No. | Consensus Rep. | Size | Iterations | Tract-size | Start | End  | Protein |
|--------|----------------|------|------------|------------|-------|------|---------|
| 1 CCT  |                | 3    | 3          | 10         | 135   | 144  | NCS     |
| 2 AGA  |                | 3    | 4          | 13         | 151   | 163  | NCS     |
| 3 CT   |                | 2    | 3          | 6          | 181   | 186  | NCS     |
| 4 A    |                | 1    | 7          | 7          | 197   | 203  | NCS     |
| 5 GT   |                | 2    | 3          | 6          | 227   | 232  | NCS     |
| 6 CA   |                | 2    | 3          | 6          | 386   | 391  | NCS     |
| 7 A    |                | 1    | 6          | 6          | 432   | 437  | NCS     |
| 8 T    |                | 1    | 6          | 6          | 491   | 496  | NCS     |
| 9 TCT  |                | 3    | 4          | 11         | 527   | 537  | VP2     |
| 10 AT  |                | 2    | 3          | 6          | 985   | 990  | VP2     |
| 11 AGG |                | 3    | 4          | 12         | 1220  | 1231 | VP2     |
| 12 C   |                | 1    | 6          | 6          | 1251  | 1256 | VP2     |
| 13 G   |                | 1    | 6          | 6          | 1521  | 1526 | VP1     |
| 14 T   |                | 1    | 8          | 8          | 1898  | 1905 | VP1     |
| 15 A   |                | 1    | 7          | 7          | 1999  | 2005 | VP1     |

|       |   |   |    |      |               |
|-------|---|---|----|------|---------------|
| 16 CT | 2 | 3 | 6  | 2690 | 2695 LTA      |
| 17 AT | 2 | 3 | 6  | 3452 | 3457 LTA      |
| 18 T  | 1 | 6 | 6  | 3505 | 3510 LTA      |
| 19 AC | 2 | 3 | 6  | 3595 | 3600 LTA      |
| 20 T  | 1 | 6 | 6  | 3603 | 3608 LTA      |
| 21 TA | 2 | 3 | 6  | 4077 | 4082 LTA      |
| 22 TA | 2 | 6 | 11 | 4137 | 4147 LTA      |
| 23 G  | 1 | 7 | 7  | 4223 | 4229 LTA      |
| 24 T  | 1 | 7 | 7  | 4672 | 4678 STA      |
| 25 TA | 2 | 3 | 6  | 4691 | 4696 STA      |
| 26 CT | 2 | 3 | 6  | 5052 | 5057 STA, LTA |

### BM11

| S.No   | Consensus Rep. | Size | Iterations | Tract-size | Start | End  | Protein       |
|--------|----------------|------|------------|------------|-------|------|---------------|
| 1 GA   |                | 2    | 4          | 8          | 8     | 8    | 15 NCS        |
| 2 CT   |                | 2    | 3          | 6          | 94    | 94   | 99 NCS        |
| 3 A    |                | 1    | 8          | 8          | 153   | 153  | 160 NCS       |
| 4 T    |                | 1    | 7          | 7          | 221   | 221  | 227 NCS       |
| 5 T    |                | 1    | 7          | 7          | 266   | 266  | 272 NCS       |
| 6 T    |                | 1    | 7          | 7          | 321   | 321  | 327 NCS       |
| 7 GGC  |                | 3    | 3          | 9          | 339   | 339  | 347 NCS       |
| 8 T    |                | 1    | 7          | 7          | 366   | 366  | 372 NCS       |
| 9 AGG  |                | 3    | 3          | 10         | 382   | 382  | 391 NCS       |
| 10 G   |                | 1    | 6          | 6          | 435   | 435  | 440 VP2       |
| 11 T   |                | 1    | 6          | 6          | 451   | 451  | 456 VP2       |
| 12 GC  |                | 2    | 3          | 6          | 767   | 767  | 772 VP2, VP3  |
| 13 A   |                | 1    | 7          | 7          | 911   | 911  | 917 VP2, VP3  |
| 14 A   |                | 1    | 6          | 6          | 1184  | 1184 | 1189 VP1      |
| 15 TA  |                | 2    | 3          | 6          | 1998  | 1998 | 2003 VP1      |
| 16 AT  |                | 2    | 3          | 6          | 2186  | 2186 | 2191 VP1      |
| 17 AT  |                | 2    | 3          | 6          | 2233  | 2233 | 2238 VP1      |
| 18 A   |                | 1    | 7          | 7          | 2351  | 2351 | 2357 NC       |
| 19 TTC |                | 3    | 3          | 9          | 2390  | 2390 | 2398 LTA      |
| 20 C   |                | 1    | 6          | 6          | 2419  | 2419 | 2424 LTA      |
| 21 ATA |                | 3    | 3          | 9          | 2572  | 2572 | 2580 LTA      |
| 22 TCT |                | 3    | 4          | 12         | 2603  | 2603 | 2614 LTA      |
| 23 T   |                | 1    | 6          | 6          | 2753  | 2753 | 2758 LTA      |
| 24 TC  |                | 2    | 3          | 6          | 2808  | 2808 | 2813 LTA      |
| 25 TC  |                | 2    | 3          | 6          | 3179  | 3179 | 3184 LTA      |
| 26 TCT |                | 3    | 3          | 9          | 3199  | 3199 | 3207 LTA      |
| 27 TG  |                | 2    | 3          | 6          | 3349  | 3349 | 3354 LTA      |
| 28 T   |                | 1    | 6          | 6          | 3502  | 3502 | 3507 LTA      |
| 29 C   |                | 1    | 6          | 6          | 3698  | 3698 | 3703 LTA      |
| 30 T   |                | 1    | 6          | 6          | 3772  | 3772 | 3777 LTA      |
| 31 TCT |                | 3    | 4          | 12         | 3968  | 3968 | 3979 LTA      |
| 32 G   |                | 1    | 6          | 6          | 4116  | 4116 | 4121 LTA      |
| 33 T   |                | 1    | 6          | 6          | 4781  | 4781 | 4786 STA      |
| 34 T   |                | 1    | 6          | 6          | 4879  | 4879 | 4884 STA      |
| 35 A   |                | 1    | 6          | 6          | 5248  | 5248 | 5253 STA, LTA |
| 36 T   |                | 1    | 6          | 6          | 5259  | 5259 | 5264 STA, LTA |

### BM12

| S.No      | Consensus Rep. | Size | Iterations | Tract-size | Start | End  | Protein      |
|-----------|----------------|------|------------|------------|-------|------|--------------|
| 1 AG      |                | 2    | 3          | 6          | 24    | 24   | 29 LTA, STA  |
| 2 A       |                | 1    | 7          | 7          | 103   | 103  | 109 LTA, STA |
| 3 T       |                | 1    | 6          | 6          | 305   | 305  | 310 STA      |
| 4 A       |                | 1    | 7          | 7          | 413   | 413  | 419 STA      |
| 5 A       |                | 1    | 6          | 6          | 509   | 509  | 514 STA      |
| 6 AT      |                | 2    | 3          | 6          | 590   | 590  | 595 NCS      |
| 7 TA      |                | 2    | 3          | 6          | 681   | 681  | 686 LTA      |
| 8 CA      |                | 2    | 3          | 6          | 969   | 969  | 974 LTA      |
| 9 C       |                | 1    | 6          | 6          | 1063  | 1063 | 1068 LTA     |
| 10 C      |                | 1    | 6          | 6          | 1093  | 1093 | 1098 LTA     |
| 11 CCCT   |                | 4    | 3          | 11         | 1209  | 1209 | 1219 LTA     |
| 12 G      |                | 1    | 6          | 6          | 1237  | 1237 | 1242 LTA     |
| 13 AG     |                | 2    | 3          | 6          | 1312  | 1312 | 1317 LTA     |
| 14 TA     |                | 2    | 3          | 6          | 1373  | 1373 | 1378 LTA     |
| 15 AGGAAA |                | 6    | 3          | 18         | 1688  | 1688 | 1705 LTA     |
| 16 T      |                | 1    | 6          | 6          | 1883  | 1883 | 1888 LTA     |
| 17 A      |                | 1    | 7          | 7          | 2001  | 2001 | 2007 LTA     |
| 18 A      |                | 1    | 8          | 8          | 2099  | 2099 | 2106 LTA     |
| 19 TTG    |                | 3    | 4          | 12         | 2300  | 2300 | 2311 LTA     |

|    |     |   |   |    |      |      |     |
|----|-----|---|---|----|------|------|-----|
| 20 | GAG | 3 | 5 | 14 | 2788 | 2801 | LTA |
| 21 | TTG | 3 | 3 | 10 | 2852 | 2861 | NCS |
| 22 | AG  | 2 | 3 | 6  | 3365 | 3370 | VP1 |
| 23 | G   | 1 | 6 | 6  | 3542 | 3547 | VP1 |
| 24 | AG  | 2 | 3 | 6  | 3692 | 3697 | VP1 |
| 25 | GT  | 2 | 3 | 6  | 3747 | 3752 | VP1 |
| 26 | AGA | 3 | 3 | 10 | 3880 | 3889 | VP1 |
| 27 | T   | 1 | 6 | 6  | 4048 | 4053 | VP1 |
| 28 | C   | 1 | 6 | 6  | 4782 | 4787 | VP2 |
| 29 | TCC | 3 | 3 | 9  | 4826 | 4834 | NCS |
| 30 | A   | 1 | 8 | 8  | 4846 | 4853 | NCS |
| 31 | A   | 1 | 9 | 9  | 4887 | 4895 | NCS |
| 32 | A   | 1 | 7 | 7  | 4937 | 4943 | NCS |
| 33 | A   | 1 | 7 | 7  | 4984 | 4990 | NCS |
| 34 | TA  | 2 | 3 | 6  | 4999 | 5004 | NCS |
| 35 | T   | 1 | 9 | 9  | 5118 | 5126 | NCS |
| 36 | A   | 1 | 6 | 6  | 5173 | 5178 | NCS |

### BM13

| S.No | Consensus Rep. | Size | Iterations | Tract-size | Start | End  | Protein  |
|------|----------------|------|------------|------------|-------|------|----------|
| 1    | T              | 1    | 7          | 7          | 67    | 73   | NCS      |
| 2    | A              | 1    | 10         | 10         | 116   | 125  | NCS      |
| 3    | TG             | 2    | 3          | 6          | 183   | 188  | NCS      |
| 4    | AAC            | 3    | 3          | 9          | 320   | 328  | NCS      |
| 5    | T              | 1    | 11         | 11         | 343   | 353  | NCS      |
| 6    | A              | 1    | 13         | 13         | 358   | 370  | NCS      |
| 7    | T              | 1    | 12         | 12         | 436   | 447  | NCS      |
| 8    | TGC            | 3    | 4          | 11         | 725   | 735  | VP2      |
| 9    | ACT            | 3    | 3          | 10         | 899   | 908  | VP2, VP3 |
| 10   | C              | 1    | 6          | 6          | 1095  | 1100 | VP2, VP3 |
| 11   | GA             | 2    | 3          | 6          | 1167  | 1172 | VP2, VP3 |
| 12   | A              | 1    | 7          | 7          | 1371  | 1377 | VP2, VP3 |
| 13   | T              | 1    | 6          | 6          | 1392  | 1397 | NCS      |
| 14   | AATT           | 4    | 3          | 11         | 1472  | 1482 | VP1      |
| 15   | C              | 1    | 6          | 6          | 1641  | 1646 | VP1      |
| 16   | C              | 1    | 7          | 7          | 2099  | 2105 | VP1      |
| 17   | TC             | 2    | 3          | 6          | 2190  | 2195 | VP1      |
| 18   | GA             | 2    | 3          | 6          | 2452  | 2457 | VP1      |
| 19   | T              | 1    | 8          | 8          | 2613  | 2620 | LTA      |
| 20   | G              | 1    | 6          | 6          | 2811  | 2816 | LTA      |
| 21   | T              | 1    | 7          | 7          | 2864  | 2870 | LTA      |
| 22   | T              | 1    | 6          | 6          | 2880  | 2885 | LTA      |
| 23   | T              | 1    | 7          | 7          | 3158  | 3164 | LTA      |
| 24   | TCA            | 3    | 3          | 10         | 3175  | 3184 | LTA      |
| 25   | T              | 1    | 7          | 7          | 4008  | 4014 | LTA      |
| 26   | G              | 1    | 7          | 7          | 4129  | 4135 | LTA      |
| 27   | G              | 1    | 8          | 8          | 4171  | 4178 | LTA      |
| 28   | TCC            | 3    | 4          | 12         | 4194  | 4205 | LTA      |
| 29   | TAAAT          | 5    | 4          | 20         | 4425  | 4444 | NCS      |
| 30   | AT             | 2    | 3          | 6          | 4763  | 4768 | STA      |
| 31   | CT             | 2    | 3          | 6          | 4821  | 4826 | STA, LTA |
| 32   | TC             | 2    | 3          | 6          | 5004  | 5009 | STA, LTA |

### BM14

| S.No | Consensus Rep. | Size | Iterations | Tract-size | Start | End  | Protein  |
|------|----------------|------|------------|------------|-------|------|----------|
| 1    | TC             | 2    | 4          | 8          | 67    | 74   | NCS      |
| 2    | GCCT           | 4    | 3          | 11         | 105   | 115  | NCS      |
| 3    | A              | 1    | 12         | 12         | 127   | 138  | NCS      |
| 4    | TTA            | 3    | 3          | 10         | 218   | 227  | NCS      |
| 5    | T              | 1    | 6          | 6          | 388   | 393  | NCS      |
| 6    | T              | 1    | 6          | 6          | 531   | 536  | VP2      |
| 7    | GT             | 2    | 3          | 6          | 657   | 662  | VP2, VP3 |
| 8    | TG             | 2    | 3          | 6          | 1113  | 1118 | VP1      |
| 9    | GGA            | 3    | 3          | 10         | 1496  | 1505 | VP1      |
| 10   | CAGTA          | 5    | 3          | 14         | 1852  | 1865 | VP1      |
| 11   | A              | 1    | 6          | 6          | 2024  | 2029 | VP1      |
| 12   | AT             | 2    | 3          | 6          | 2183  | 2188 | VP1      |
| 13   | AT             | 2    | 3          | 6          | 2538  | 2543 | NCS      |
| 14   | T              | 1    | 6          | 6          | 2731  | 2736 | LTA      |
| 15   | G              | 1    | 6          | 6          | 2923  | 2928 | LTA      |
| 16   | T              | 1    | 7          | 7          | 2957  | 2963 | LTA      |
| 17   | TC             | 2    | 3          | 6          | 2996  | 3001 | LTA      |
| 18   | A              | 1    | 6          | 6          | 3085  | 3090 | LTA      |

|         |   |   |    |      |                    |
|---------|---|---|----|------|--------------------|
| 19 AT   | 2 | 3 | 6  | 3225 | 3230 LTA           |
| 20 AGTT | 4 | 3 | 11 | 3253 | 3263 LTA           |
| 21 AT   | 2 | 3 | 6  | 3337 | 3342 LTA           |
| 22 CT   | 2 | 3 | 6  | 3406 | 3411 LTA           |
| 23 TAA  | 3 | 3 | 9  | 3424 | 3432 LTA           |
| 24 T    | 1 | 6 | 6  | 3682 | 3687 LTA           |
| 25 TA   | 2 | 3 | 6  | 3987 | 3992 LTA           |
| 26 T    | 1 | 6 | 6  | 4089 | 4094 LTA, ATA      |
| 27 TCT  | 3 | 4 | 11 | 4162 | 4172 LTA, ATA      |
| 28 CT   | 2 | 4 | 8  | 4183 | 4190 LTA, ATA      |
| 29 GAG  | 3 | 4 | 12 | 4367 | 4378 LTA, ATA      |
| 30 A    | 1 | 7 | 7  | 4510 | 4516 NCS           |
| 31 A    | 1 | 6 | 6  | 4532 | 4537 NCS           |
| 32 TC   | 2 | 3 | 6  | 4641 | 4646 STA           |
| 33 T    | 1 | 7 | 7  | 4705 | 4711 STA, ATA      |
| 34 AG   | 2 | 3 | 6  | 4933 | 4938 STA, ATA, LTA |
| 35 T    | 1 | 6 | 6  | 4954 | 4959 STA, ATA, LTA |

### BM15

| S.No   | Consensus Rep. | Size | Iterations | Tract-size | Start | End  | Protein  |
|--------|----------------|------|------------|------------|-------|------|----------|
| 1 T    |                | 1    | 6          | 6          | 119   | 124  | NCS      |
| 2 CT   |                | 2    | 4          | 8          | 154   | 161  | NCS      |
| 3 T    |                | 1    | 8          | 8          | 161   | 168  | NCS      |
| 4 A    |                | 1    | 10         | 10         | 213   | 222  | NCS      |
| 5 T    |                | 1    | 7          | 7          | 331   | 337  | NCS      |
| 6 T    |                | 1    | 7          | 7          | 373   | 379  | NCS      |
| 7 T    |                | 1    | 8          | 8          | 401   | 408  | NCS      |
| 8 AGG  |                | 3    | 3          | 10         | 418   | 427  | VP2      |
| 9 G    |                | 1    | 6          | 6          | 467   | 472  | VP2      |
| 10 CT  |                | 2    | 3          | 6          | 746   | 751  | VP2      |
| 11 GCA |                | 3    | 3          | 9          | 1073  | 1081 | VP2      |
| 12 AT  |                | 2    | 3          | 6          | 1124  | 1129 | VP2      |
| 13 AT  |                | 2    | 3          | 6          | 2221  | 2226 | VP1      |
| 14 CAG |                | 3    | 3          | 9          | 2324  | 2332 | VP1      |
| 15 TC  |                | 2    | 3          | 6          | 3331  | 3336 | LTA      |
| 16 TA  |                | 2    | 3          | 6          | 3972  | 3977 | LTA      |
| 17 T   |                | 1    | 6          | 6          | 4043  | 4048 | LTA      |
| 18 C   |                | 1    | 6          | 6          | 4108  | 4113 | LTA      |
| 19 AGG |                | 3    | 3          | 9          | 4161  | 4169 | LTA      |
| 20 G   |                | 1    | 6          | 6          | 4255  | 4260 | LTA      |
| 21 AT  |                | 2    | 3          | 6          | 4702  | 4707 | LTA      |
| 22 T   |                | 1    | 6          | 6          | 4874  | 4879 | STA      |
| 23 T   |                | 1    | 7          | 7          | 4969  | 4975 | STA      |
| 24 AG  |                | 2    | 3          | 6          | 5348  | 5353 | STA, LTA |
| 25 CT  |                | 2    | 3          | 6          | 5355  | 5360 | STA, LTA |

### BM16

| S.No   | Consensus Rep. | Size | Iterations | Tract-size | Start | End  | Protein  |
|--------|----------------|------|------------|------------|-------|------|----------|
| 1 A    |                | 1    | 6          | 6          | 26    | 31   | NCS      |
| 2 CA   |                | 2    | 5          | 10         | 207   | 216  | NCS      |
| 3 AGC  |                | 3    | 4          | 12         | 505   | 516  | VP2      |
| 4 TAGA |                | 4    | 3          | 12         | 988   | 999  | VP2, VP3 |
| 5 A    |                | 1    | 6          | 6          | 1122  | 1127 | VP2, VP3 |
| 6 GA   |                | 2    | 3          | 6          | 1570  | 1575 | VP1      |
| 7 CT   |                | 2    | 3          | 6          | 1691  | 1696 | VP1      |
| 8 ATG  |                | 3    | 3          | 10         | 1725  | 1734 | VP1      |
| 9 CA   |                | 2    | 3          | 6          | 1886  | 1891 | VP1      |
| 10 A   |                | 1    | 6          | 6          | 1970  | 1975 | VP1      |
| 11 GA  |                | 2    | 5          | 10         | 2201  | 2210 | VP1      |
| 12 AT  |                | 2    | 3          | 6          | 2378  | 2383 | VP1      |
| 13 C   |                | 1    | 7          | 7          | 2411  | 2417 | VP1      |
| 14 TA  |                | 2    | 3          | 6          | 2508  | 2513 | NC       |
| 15 TTC |                | 3    | 4          | 12         | 2567  | 2578 | LTA      |
| 16 CAA |                | 3    | 3          | 9          | 2750  | 2758 | LTA      |
| 17 T   |                | 1    | 7          | 7          | 3229  | 3235 | LTA      |
| 18 T   |                | 1    | 6          | 6          | 3475  | 3480 | LTA      |
| 19 T   |                | 1    | 6          | 6          | 3554  | 3559 | LTA      |
| 20 GT  |                | 2    | 3          | 6          | 3824  | 3829 | LTA      |
| 21 TA  |                | 2    | 3          | 6          | 3979  | 3984 | LTA      |
| 22 T   |                | 1    | 7          | 7          | 4082  | 4088 | LTA      |
| 23 G   |                | 1    | 7          | 7          | 4095  | 4101 | LTA      |
| 24 TCT |                | 3    | 4          | 12         | 4154  | 4165 | LTA      |
| 25 AC  |                | 2    | 3          | 6          | 4604  | 4609 | STA      |

|       |   |   |    |      |               |
|-------|---|---|----|------|---------------|
| 26 T  | 1 | 9 | 9  | 4732 | 4740 STA      |
| 27 T  | 1 | 6 | 6  | 4881 | 4886 STA, LTA |
| 28 T  | 1 | 7 | 7  | 4926 | 4932 STA, LTA |
| 29 TG | 2 | 3 | 6  | 5117 | 5122 STA, LTA |
| 30 CT | 2 | 5 | 10 | 5197 | 5206 STA, LTA |

### BM17

| Sl.No. | Consensus Rep. | Size | Iterations | Tract-size | Start | End  | Protein       |
|--------|----------------|------|------------|------------|-------|------|---------------|
| 1      | AAGTT          | 5    | 3          | 14         | 42    | 55   | NCS           |
| 2      | CT             | 2    | 4          | 8          | 110   | 117  | NCS           |
| 3      | A              | 1    | 9          | 9          | 168   | 176  | NCS           |
| 4      | GT             | 2    | 3          | 6          | 339   | 344  | NCS           |
| 5      | G              | 1    | 8          | 8          | 505   | 512  | VP2           |
| 6      | GCT            | 3    | 4          | 12         | 608   | 619  | VP2           |
| 7      | T              | 1    | 6          | 6          | 773   | 778  | VP2           |
| 8      | GAA            | 3    | 4          | 12         | 1430  | 1441 | VP2, VP3      |
| 9      | C              | 1    | 6          | 6          | 1447  | 1452 | VP2, VP3, VP1 |
| 10     | A              | 1    | 8          | 8          | 1487  | 1494 | VP2, VP3, VP1 |
| 11     | AC             | 2    | 3          | 6          | 1768  | 1773 | VP1           |
| 12     | G              | 1    | 6          | 6          | 1844  | 1849 | VP1           |
| 13     | AT             | 2    | 3          | 6          | 1853  | 1858 | VP1           |
| 14     | CTA            | 3    | 4          | 13         | 1960  | 1972 | VP1           |
| 15     | C              | 1    | 7          | 7          | 2146  | 2152 | VP1           |
| 16     | C              | 1    | 6          | 6          | 2534  | 2539 | VP1           |
| 17     | GAA            | 3    | 4          | 11         | 2611  | 2621 | NCS           |
| 18     | TC             | 2    | 3          | 6          | 2725  | 2730 | LTA           |
| 19     | T              | 1    | 6          | 6          | 2841  | 2846 | LTA           |
| 20     | T              | 1    | 6          | 6          | 2859  | 2864 | LTA           |
| 21     | T              | 1    | 8          | 8          | 3001  | 3008 | LTA           |
| 22     | TCA            | 3    | 4          | 11         | 3111  | 3121 | LTA           |
| 23     | A              | 1    | 6          | 6          | 3208  | 3213 | LTA           |
| 24     | T              | 1    | 6          | 6          | 3281  | 3286 | LTA           |
| 25     | T              | 1    | 6          | 6          | 3315  | 3320 | LTA           |
| 26     | T              | 1    | 7          | 7          | 3608  | 3614 | LTA           |
| 27     | T              | 1    | 6          | 6          | 4032  | 4037 | LTA           |
| 28     | A              | 1    | 6          | 6          | 4097  | 4102 | LTA           |
| 29     | G              | 1    | 6          | 6          | 4159  | 4164 | LTA           |
| 30     | TCA            | 3    | 3          | 9          | 4271  | 4279 | LTA           |
| 31     | C              | 1    | 6          | 6          | 4357  | 4362 | LTA           |
| 32     | T              | 1    | 6          | 6          | 4376  | 4381 | LTA           |
| 33     | A              | 1    | 9          | 9          | 4440  | 4448 | NCS           |
| 34     | T              | 1    | 8          | 8          | 4611  | 4618 | STA           |
| 35     | TGC            | 3    | 4          | 11         | 4636  | 4646 | STA           |

### BM18

| Sl.No. | Consensus Rep. | Size | Iterations | Tract-size | Start | End  | Protein  |
|--------|----------------|------|------------|------------|-------|------|----------|
| 1      | A              | 1    | 6          | 6          | 9     | 14   | NCS      |
| 2      | CT             | 2    | 4          | 8          | 115   | 122  | NCS      |
| 3      | GAG            | 3    | 3          | 12         | 132   | 143  | NCS      |
| 4      | A              | 1    | 6          | 6          | 174   | 179  | NCS      |
| 5      | T              | 1    | 6          | 6          | 481   | 486  | NCS      |
| 6      | G              | 1    | 6          | 6          | 518   | 523  | VP2      |
| 7      | T              | 1    | 8          | 8          | 784   | 791  | VP2      |
| 8      | TIA            | 3    | 3          | 10         | 931   | 940  | VP2      |
| 9      | G              | 1    | 6          | 6          | 961   | 966  | VP2      |
| 10     | AGA            | 3    | 4          | 13         | 1438  | 1450 | VP2, VP1 |
| 11     | A              | 1    | 6          | 6          | 1491  | 1496 | VP2, VP1 |
| 12     | TAAT           | 4    | 3          | 13         | 1659  | 1671 | VP1      |
| 13     | AT             | 2    | 3          | 6          | 1860  | 1865 | VP1      |
| 14     | G              | 1    | 6          | 6          | 1926  | 1931 | VP1      |
| 15     | TATTGT         | 6    | 3          | 19         | 2575  | 2593 | NCS      |
| 16     | A              | 1    | 6          | 6          | 2596  | 2601 | NCS      |
| 17     | TC             | 2    | 3          | 6          | 2721  | 2726 | LTA      |
| 18     | T              | 1    | 6          | 6          | 2855  | 2860 | LTA      |
| 19     | T              | 1    | 6          | 6          | 2997  | 3002 | LTA      |
| 20     | T              | 1    | 7          | 7          | 3275  | 3281 | LTA      |
| 21     | T              | 1    | 7          | 7          | 3523  | 3529 | LTA      |
| 22     | T              | 1    | 8          | 8          | 3603  | 3610 | LTA      |
| 23     | A              | 1    | 6          | 6          | 4093  | 4098 | LTA      |
| 24     | T              | 1    | 8          | 8          | 4128  | 4135 | LTA      |
| 25     | CTCTGG         | 6    | 4          | 24         | 4204  | 4227 | LTA      |

|        |   |    |    |      |               |
|--------|---|----|----|------|---------------|
| 26 G   | 1 | 6  | 6  | 4244 | 4249 LTA      |
| 27 TCT | 3 | 4  | 12 | 4273 | 4284 LTA      |
| 28 GTG | 3 | 5  | 15 | 4292 | 4306 LTA      |
| 29 A   | 1 | 6  | 6  | 4349 | 4354 LTA      |
| 30 A   | 1 | 17 | 17 | 4493 | 4509 NCS      |
| 31 T   | 1 | 8  | 8  | 4672 | 4679 STA      |
| 32 T   | 1 | 6  | 6  | 4705 | 4710 STA      |
| 33 A   | 1 | 7  | 7  | 4835 | 4841 STA      |
| 34 T   | 1 | 6  | 6  | 4992 | 4997 STA, LTA |
| 35 GA  | 2 | 3  | 6  | 5001 | 5006 STA, LTA |

### BM19

| Sl.No. | Consensus Rep. | Size | Iterations | Tract-size | Start | End  | Protein  |
|--------|----------------|------|------------|------------|-------|------|----------|
| 1 AG   |                | 2    | 3          | 6          | 35    | 40   | NCS      |
| 2 GAG  |                | 3    | 4          | 12         | 77    | 88   | NCS      |
| 3 CA   |                | 2    | 3          | 6          | 145   | 150  | NCS      |
| 4 GCAA |                | 4    | 3          | 11         | 179   | 189  | NCS      |
| 5 G    |                | 1    | 6          | 6          | 782   | 787  | NCS      |
| 6 T    |                | 1    | 6          | 6          | 822   | 827  | NCS      |
| 7 ATC  |                | 3    | 3          | 9          | 1007  | 1015 | MTA, LTA |
| 8 C    |                | 1    | 9          | 9          | 1047  | 1055 | MTA, LTA |
| 9 AG   |                | 2    | 3          | 6          | 1183  | 1188 | MTA, LTA |
| 10 CCA |                | 3    | 3          | 10         | 1190  | 1199 | MTA, LTA |
| 11 AGG |                | 3    | 4          | 12         | 1199  | 1210 | MTA, LTA |
| 12 T   |                | 1    | 6          | 6          | 1423  | 1428 | MTA, LTA |
| 13 TG  |                | 2    | 3          | 6          | 1677  | 1682 | LTA      |
| 14 A   |                | 1    | 8          | 8          | 1753  | 1760 | LTA      |
| 15 AG  |                | 2    | 3          | 6          | 2063  | 2068 | LTA      |
| 16 A   |                | 1    | 8          | 8          | 2216  | 2223 | LTA      |
| 17 GA  |                | 2    | 3          | 6          | 2456  | 2461 | LTA      |
| 18 T   |                | 1    | 7          | 7          | 2558  | 2564 | LTA      |
| 19 TC  |                | 2    | 3          | 6          | 2736  | 2741 | LTA      |
| 20 TG  |                | 2    | 3          | 6          | 3933  | 3938 | VP1      |
| 21 AT  |                | 2    | 3          | 6          | 4419  | 4424 | VP2, VP3 |
| 22 CT  |                | 2    | 3          | 6          | 4437  | 4442 | VP2, VP3 |
| 23 TC  |                | 2    | 3          | 6          | 4822  | 4827 | VP2      |
| 24 T   |                | 1    | 6          | 6          | 5343  | 5348 | NCS      |

### BM20

| S.No    | Consensus Rep. | Size | Iterations | Tract-size | Start | End  | Protein  |
|---------|----------------|------|------------|------------|-------|------|----------|
| 1 T     |                | 1    | 7          | 7          | 71    | 77   | NCS      |
| 2 A     |                | 1    | 7          | 7          | 122   | 128  | NCS      |
| 3 AAGC  |                | 4    | 3          | 12         | 348   | 359  | NCS      |
| 4 AAG   |                | 3    | 3          | 9          | 411   | 419  | NCS      |
| 5 AT    |                | 2    | 3          | 6          | 456   | 461  | NCS      |
| 6 AG    |                | 2    | 3          | 6          | 1089  | 1094 | VP2      |
| 7 TAC   |                | 3    | 3          | 9          | 1285  | 1293 | VP1      |
| 8 AC    |                | 2    | 3          | 6          | 1557  | 1562 | VP1      |
| 9 CA    |                | 2    | 3          | 6          | 1594  | 1599 | VP1      |
| 10 G    |                | 1    | 6          | 6          | 1648  | 1653 | VP1      |
| 11 AT   |                | 2    | 3          | 6          | 2263  | 2268 | VP1      |
| 12 AT   |                | 2    | 3          | 6          | 2353  | 2358 | NCS      |
| 13 TCT  |                | 3    | 4          | 12         | 2414  | 2425 | LTA      |
| 14 CT   |                | 2    | 3          | 6          | 2533  | 2538 | LTA      |
| 15 T    |                | 1    | 6          | 6          | 2637  | 2642 | LTA      |
| 16 CA   |                | 2    | 3          | 6          | 2740  | 2745 | LTA      |
| 17 CT   |                | 2    | 3          | 6          | 3239  | 3244 | LTA      |
| 18 TAA  |                | 3    | 3          | 9          | 3247  | 3255 | LTA      |
| 19 AAT  |                | 3    | 3          | 10         | 3433  | 3442 | LTA      |
| 20 AG   |                | 2    | 3          | 6          | 3771  | 3776 | LTA      |
| 21 TG   |                | 2    | 3          | 6          | 4144  | 4149 | LTA      |
| 22 TCT  |                | 3    | 4          | 12         | 4151  | 4162 | LTA      |
| 23 TA   |                | 2    | 3          | 6          | 4227  | 4232 | LTA      |
| 24 A    |                | 1    | 7          | 7          | 4299  | 4305 | NCS      |
| 25 ACTA |                | 4    | 3          | 12         | 4309  | 4320 | NCS      |
| 26 AC   |                | 2    | 3          | 6          | 4493  | 4498 | STA      |
| 27 T    |                | 1    | 6          | 6          | 4749  | 4754 | LTA, STA |
| 28 T    |                | 1    | 6          | 6          | 4783  | 4788 | LTA, STA |
| 29 TC   |                | 2    | 3          | 6          | 4894  | 4899 | LTA, STA |

### BM21

| S.No | Consensus Rep. | Size | Iterations | Tract-size | Start | End  | Protein           |
|------|----------------|------|------------|------------|-------|------|-------------------|
| 1    | AG             | 2    | 3          | 6          | 6     | 38   | 43 NCS            |
| 2    | G              | 1    | 6          | 6          | 6     | 245  | 250 LTA, MTA, STA |
| 3    | AG             | 2    | 3          | 6          | 6     | 568  | 573 MTA, STA      |
| 4    | GAA            | 3    | 4          | 12         | 1056  | 1067 | LTA, MTA          |
| 5    | C              | 1    | 7          | 7          | 7     | 1108 | 1114 LTA, MTA     |
| 6    | GGA            | 3    | 7          | 21         | 1160  | 1180 | LTA, MTA          |
| 7    | C              | 1    | 9          | 9          | 9     | 1241 | 1249 LTA, MTA     |
| 8    | G              | 1    | 6          | 6          | 6     | 1591 | 1596 LTA          |
| 9    | AGC            | 3    | 3          | 10         | 2031  | 2040 | LTA               |
| 10   | GA             | 2    | 3          | 6          | 6     | 2105 | 2110 LTA          |
| 11   | TC             | 2    | 3          | 6          | 6     | 2345 | 2350 LTA          |
| 12   | A              | 1    | 7          | 7          | 7     | 2535 | 2541 LTA          |
| 13   | TG             | 2    | 4          | 8          | 8     | 2576 | 2583 LTA          |
| 14   | T              | 1    | 6          | 6          | 6     | 3383 | 3388 VP1          |
| 15   | CCTT           | 4    | 3          | 11         | 3518  | 3528 | VP1               |
| 16   | CA             | 2    | 3          | 6          | 6     | 4536 | 4541 VP2, VP3     |
| 17   | TA             | 2    | 3          | 6          | 6     | 4626 | 4631 VP2, VP3     |
| 18   | T              | 1    | 8          | 8          | 8     | 5283 | 5290 NCS          |

### BM22

| S.No | Consensus Rep. | Size | Iterations | Tract-size | Start | End  | Protein       |
|------|----------------|------|------------|------------|-------|------|---------------|
| 1    | GAG            | 3    | 3          | 9          | 9     | 25   | 33 NCS        |
| 2    | A              | 1    | 7          | 7          | 7     | 84   | 90 NCS        |
| 3    | CT             | 2    | 3          | 6          | 6     | 103  | 108 NCS       |
| 4    | A              | 1    | 12         | 12         | 12    | 162  | 173 NCS       |
| 5    | T              | 1    | 7          | 7          | 7     | 243  | 249 NCS       |
| 6    | T              | 1    | 6          | 6          | 6     | 287  | 292 NCS       |
| 7    | T              | 1    | 8          | 8          | 8     | 332  | 339 NCS       |
| 8    | T              | 1    | 7          | 7          | 7     | 375  | 381 NCS       |
| 9    | T              | 1    | 12         | 12         | 12    | 420  | 431 NCS       |
| 10   | G              | 1    | 6          | 6          | 6     | 438  | 443 VP2       |
| 11   | CT             | 2    | 3          | 6          | 6     | 523  | 528 VP2       |
| 12   | ATA            | 3    | 4          | 12         | 12    | 953  | 964 VP2, VP3  |
| 13   | AT             | 2    | 3          | 6          | 6     | 1092 | 1097 VP2, VP3 |
| 14   | TG             | 2    | 3          | 6          | 6     | 1157 | 1162 VP1      |
| 15   | G              | 1    | 7          | 7          | 7     | 1220 | 1226 VP1      |
| 16   | TGA            | 3    | 3          | 10         | 10    | 1431 | 1440 VP1      |
| 17   | CT             | 2    | 3          | 6          | 6     | 1507 | 1512 VP1      |
| 18   | A              | 1    | 6          | 6          | 6     | 1702 | 1707 VP1      |
| 19   | AT             | 2    | 3          | 6          | 6     | 2209 | 2214 VP1      |
| 20   | CCT            | 3    | 4          | 12         | 12    | 2378 | 2389 VP1      |
| 21   | TC             | 2    | 3          | 6          | 6     | 2601 | 2606 LTA      |
| 22   | TCT            | 3    | 4          | 12         | 12    | 2702 | 2713 LTA      |
| 23   | G              | 1    | 6          | 6          | 6     | 2834 | 2839 LTA      |
| 24   | T              | 1    | 6          | 6          | 6     | 2867 | 2872 LTA      |
| 25   | T              | 1    | 8          | 8          | 8     | 3346 | 3353 LTA      |
| 26   | T              | 1    | 6          | 6          | 6     | 3599 | 3604 LTA      |
| 27   | TA             | 2    | 3          | 6          | 6     | 3682 | 3687 LTA      |
| 28   | A              | 1    | 7          | 7          | 7     | 3868 | 3874 LTA      |
| 29   | T              | 1    | 6          | 6          | 6     | 3999 | 4004 LTA      |
| 30   | CT             | 2    | 3          | 6          | 6     | 4134 | 4139 LTA      |
| 31   | CTC            | 3    | 3          | 9          | 9     | 4157 | 4165 LTA      |
| 32   | CT             | 2    | 3          | 6          | 6     | 4310 | 4315 LTA      |
| 33   | TCA            | 3    | 4          | 12         | 12    | 4515 | 4526 LTA      |
| 34   | T              | 1    | 6          | 6          | 6     | 4660 | 4665 STA      |
| 35   | CCAC           | 4    | 3          | 12         | 12    | 4667 | 4678 STA      |
| 36   | CA             | 2    | 3          | 6          | 6     | 4808 | 4813 STA      |
| 37   | A              | 1    | 8          | 8          | 8     | 4862 | 4869 STA      |

### BM23

| S.No | Consensus Rep. | Size | Iterations | Tract-size | Start | End  | Protein       |
|------|----------------|------|------------|------------|-------|------|---------------|
| 1    | CCT            | 3    | 3          | 10         | 10    | 6    | 15 NCS        |
| 2    | CCT            | 3    | 3          | 10         | 10    | 68   | 77 NCS        |
| 3    | T              | 1    | 7          | 7          | 7     | 77   | 83 NCS        |
| 4    | CCT            | 3    | 3          | 9          | 9     | 113  | 121 NCS       |
| 5    | A              | 1    | 8          | 8          | 8     | 127  | 134 NCS       |
| 6    | T              | 1    | 7          | 7          | 7     | 451  | 457 NCS       |
| 7    | TC             | 2    | 3          | 6          | 6     | 903  | 908 VP2, VP3  |
| 8    | G              | 1    | 6          | 6          | 6     | 1065 | 1070 VP2, VP3 |
| 9    | TG             | 2    | 3          | 6          | 6     | 1183 | 1188 VP1      |
| 10   | AT             | 2    | 3          | 6          | 6     | 2262 | 2267 VP1      |
| 11   | C              | 1    | 8          | 8          | 8     | 2296 | 2303 VP1      |

|         |   |   |    |      |          |
|---------|---|---|----|------|----------|
| 12 TAAA | 4 | 3 | 11 | 2343 | 2353 NCS |
| 13 T    | 1 | 6 | 6  | 2494 | 2499 LTA |
| 14 AAG  | 3 | 3 | 9  | 2543 | 2551 LTA |
| 15 CT   | 2 | 3 | 6  | 2580 | 2585 LTA |
| 16 T    | 1 | 6 | 6  | 2602 | 2607 LTA |
| 17 TC   | 2 | 3 | 6  | 2784 | 2789 LTA |
| 18 T    | 1 | 6 | 6  | 3147 | 3152 LTA |
| 19 CT   | 2 | 3 | 6  | 3204 | 3209 LTA |
| 20 T    | 1 | 6 | 6  | 3946 | 3951 LTA |
| 21 CT   | 2 | 4 | 8  | 3979 | 3986 LTA |
| 22 GT   | 2 | 6 | 11 | 4010 | 4020 LTA |
| 23 ACG  | 3 | 4 | 12 | 4033 | 4044 LTA |
| 24 A    | 1 | 7 | 7  | 4312 | 4318 NCS |
| 25 T    | 1 | 6 | 6  | 4807 | 4812 LTA |
| 26 T    | 1 | 6 | 6  | 4893 | 4898 LTA |

#### BM24

| S.No    | Consensus Rep. | Size | Iterations | Tract-size | Start | End  | Protein        |
|---------|----------------|------|------------|------------|-------|------|----------------|
| 1 GC    |                | 2    | 3          | 6          | 26    | 31   | NCS            |
| 2 CCT   |                | 3    | 3          | 10         | 69    | 78   | NCS            |
| 3 GCCT  |                | 4    | 3          | 11         | 106   | 116  | NCS            |
| 4 A     |                | 1    | 8          | 8          | 130   | 137  | NCS            |
| 5 TG    |                | 2    | 4          | 8          | 272   | 279  | VP2            |
| 6 T     |                | 1    | 6          | 6          | 367   | 372  | VP2            |
| 7 T     |                | 1    | 6          | 6          | 502   | 507  | VP2            |
| 8 CT    |                | 2    | 3          | 6          | 931   | 936  | VP2, VP3       |
| 9 TG    |                | 2    | 3          | 6          | 1060  | 1065 | VP1, VP2, VP3, |
| 10 TG   |                | 2    | 3          | 6          | 1087  | 1092 | VP1            |
| 11 GAA  |                | 3    | 4          | 12         | 1648  | 1659 | VP1            |
| 12 GAA  |                | 3    | 4          | 13         | 2098  | 2110 | VP1            |
| 13 AGAT |                | 4    | 3          | 12         | 2155  | 2166 | VP1            |
| 14 ACC  |                | 3    | 4          | 11         | 2434  | 2444 | VP1            |
| 15 T    |                | 1    | 6          | 6          | 2664  | 2669 | LTA            |
| 16 AAT  |                | 3    | 3          | 10         | 2740  | 2749 | LTA            |
| 17 T    |                | 1    | 6          | 6          | 2802  | 2807 | LTA            |
| 18 AT   |                | 2    | 3          | 6          | 2883  | 2888 | LTA            |
| 19 TC   |                | 2    | 3          | 6          | 2984  | 2989 | LTA            |
| 20 T    |                | 1    | 6          | 6          | 3028  | 3033 | LTA            |
| 21 AT   |                | 2    | 3          | 6          | 3213  | 3218 | LTA            |
| 22 AT   |                | 2    | 6          | 11         | 3322  | 3332 | LTA            |
| 23 CT   |                | 2    | 3          | 6          | 3394  | 3399 | LTA            |
| 24 T    |                | 1    | 6          | 6          | 3537  | 3542 | LTA            |
| 25 CA   |                | 2    | 3          | 6          | 3556  | 3561 | LTA            |
| 26 CTG  |                | 3    | 4          | 12         | 3621  | 3632 | LTA            |
| 27 ATAA |                | 4    | 3          | 12         | 3688  | 3699 | LTA            |
| 28 CCT  |                | 3    | 3          | 9          | 3872  | 3880 | LTA            |
| 29 TA   |                | 2    | 3          | 6          | 3975  | 3980 | LTA            |
| 30 T    |                | 1    | 6          | 6          | 4077  | 4082 | LTA            |
| 31 CT   |                | 2    | 4          | 8          | 4171  | 4178 | LTA            |
| 32 AGAA |                | 4    | 3          | 12         | 4638  | 4649 | STA            |
| 33 T    |                | 1    | 6          | 6          | 4933  | 4938 | STA            |
| 34 T    |                | 1    | 6          | 6          | 5065  | 5070 | STA            |

#### BM25

| S.No    | Consensus Rep. | Size | Iterations | Tract-size | Start | End  | Protein  |
|---------|----------------|------|------------|------------|-------|------|----------|
| 1 A     |                | 1    | 7          | 7          | 103   | 109  | LTA, STA |
| 2 A     |                | 1    | 7          | 7          | 413   | 419  | STA      |
| 3 TA    |                | 2    | 3          | 6          | 667   | 672  | LTA      |
| 4 G     |                | 1    | 6          | 6          | 773   | 778  | LTA      |
| 5 CCT   |                | 3    | 4          | 13         | 1058  | 1070 | LTA      |
| 6 C     |                | 1    | 6          | 6          | 1088  | 1093 | LTA      |
| 7 C     |                | 1    | 7          | 7          | 1203  | 1209 | LTA      |
| 8 G     |                | 1    | 6          | 6          | 1235  | 1240 | LTA      |
| 9 A     |                | 1    | 6          | 6          | 1300  | 1305 | LTA      |
| 10 TA   |                | 2    | 6          | 11         | 1402  | 1412 | LTA      |
| 11 AG   |                | 2    | 3          | 6          | 1447  | 1452 | LTA      |
| 12 TGTA |                | 4    | 3          | 11         | 1579  | 1589 | LTA      |
| 13 TA   |                | 2    | 3          | 6          | 1614  | 1619 | LTA      |
| 14 CA   |                | 2    | 3          | 6          | 1842  | 1847 | LTA      |
| 15 AG   |                | 2    | 3          | 6          | 2011  | 2016 | LTA      |
| 16 TGC  |                | 3    | 3          | 9          | 2197  | 2205 | LTA      |
| 17 A    |                | 1    | 8          | 8          | 2421  | 2428 | LTA      |
| 18 GA   |                | 2    | 3          | 6          | 2551  | 2556 | LTA      |

|    |      |   |   |    |      |      |          |
|----|------|---|---|----|------|------|----------|
| 19 | AGA  | 3 | 3 | 9  | 2782 | 2790 | LTA      |
| 20 | TA   | 2 | 3 | 6  | 3006 | 3011 | VP1      |
| 21 | A    | 1 | 6 | 6  | 3247 | 3252 | VP1      |
| 22 | T    | 1 | 6 | 6  | 3840 | 3845 | VP1      |
| 23 | CA   | 2 | 3 | 6  | 4068 | 4073 | VP1, VP3 |
| 24 | ACTG | 4 | 3 | 12 | 4267 | 4278 | VP2, VP3 |
| 25 | A    | 1 | 6 | 6  | 4461 | 4466 | VP2, VP3 |
| 26 | C    | 1 | 6 | 6  | 4805 | 4810 | VP2      |
| 27 | A    | 1 | 9 | 9  | 4817 | 4825 | NCS      |
| 28 | CTC  | 3 | 4 | 11 | 4848 | 4858 | NCS      |
| 29 | A    | 1 | 7 | 7  | 4869 | 4875 | NCS      |
| 30 | A    | 1 | 8 | 8  | 4900 | 4907 | NCS      |
| 31 | TC   | 2 | 3 | 6  | 4921 | 4926 | NCS      |
| 32 | A    | 1 | 7 | 7  | 4950 | 4956 | NCS      |
| 33 | A    | 1 | 7 | 7  | 4993 | 4999 | NCS      |
| 34 | CTC  | 3 | 5 | 14 | 5014 | 5027 | NCS      |
| 35 | T    | 1 | 8 | 8  | 5109 | 5116 | NCS      |
| 36 | A    | 1 | 8 | 8  | 5164 | 5171 | NCS      |
| 37 | GA   | 2 | 3 | 6  | 5172 | 5177 | NCS      |

### BM26

| S.No | Consensus Rep. | Size | Iterations | Tract-size | Start | End  | Protein       |
|------|----------------|------|------------|------------|-------|------|---------------|
| 1    | AG             | 2    | 3          | 6          | 24    | 29   | LTA, STA      |
| 2    | A              | 1    | 7          | 7          | 103   | 109  | LTA, STA      |
| 3    | A              | 1    | 7          | 7          | 413   | 419  | STA           |
| 4    | A              | 1    | 6          | 6          | 509   | 514  | STA           |
| 5    | TA             | 2    | 3          | 6          | 681   | 686  | LTA           |
| 6    | C              | 1    | 6          | 6          | 1093  | 1098 | LTA           |
| 7    | CCCT           | 4    | 3          | 11         | 1212  | 1222 | LTA           |
| 8    | G              | 1    | 6          | 6          | 1243  | 1248 | LTA           |
| 9    | A              | 1    | 6          | 6          | 1308  | 1313 | LTA           |
| 10   | GA             | 2    | 3          | 6          | 1319  | 1324 | LTA           |
| 11   | A              | 1    | 6          | 6          | 1448  | 1453 | LTA           |
| 12   | AT             | 2    | 3          | 6          | 1621  | 1626 | LTA           |
| 13   | A              | 1    | 8          | 8          | 2105  | 2112 | LTA           |
| 14   | GA             | 2    | 3          | 6          | 2559  | 2564 | LTA           |
| 15   | AGA            | 3    | 4          | 12         | 2590  | 2601 | LTA           |
| 16   | TAT            | 3    | 4          | 11         | 2622  | 2632 | LTA           |
| 17   | TC             | 2    | 3          | 6          | 2831  | 2836 | LTA           |
| 18   | T              | 1    | 8          | 8          | 2902  | 2909 | NCS           |
| 19   | T              | 1    | 6          | 6          | 2960  | 2965 | VP1           |
| 20   | G              | 1    | 6          | 6          | 3003  | 3008 | VP1           |
| 21   | TA             | 2    | 3          | 6          | 3281  | 3286 | VP1           |
| 22   | CT             | 2    | 3          | 6          | 3551  | 3556 | VP1           |
| 23   | GT             | 2    | 3          | 6          | 3806  | 3811 | VP1           |
| 24   | GCT            | 3    | 4          | 12         | 4126  | 4137 | VP1, VP2, VP3 |
| 25   | C              | 1    | 6          | 6          | 4841  | 4846 | VP2           |
| 26   | A              | 1    | 8          | 8          | 4905  | 4912 | NCS           |
| 27   | A              | 1    | 7          | 7          | 4937  | 4943 | NCS           |
| 28   | A              | 1    | 7          | 7          | 4984  | 4990 | NCS           |
| 29   | T              | 1    | 6          | 6          | 5120  | 5125 | NCS           |
| 30   | A              | 1    | 8          | 8          | 5172  | 5179 | NCS           |
| 31   | GA             | 2    | 3          | 6          | 5180  | 5185 | NCS           |
| 32   | T              | 1    | 6          | 6          | 5279  | 5284 | NCS           |

### BM27

| S.No | Consensus Rep. | Size | Iterations | Tract-size | Start | End  | Protein  |
|------|----------------|------|------------|------------|-------|------|----------|
| 1    | CCT            | 3    | 3          | 10         | 83    | 92   | NCS      |
| 2    | CCT            | 3    | 4          | 13         | 122   | 134  | NCS      |
| 3    | A              | 1    | 7          | 7          | 146   | 152  | NCS      |
| 4    | T              | 1    | 6          | 6          | 335   | 340  | NCS      |
| 5    | T              | 1    | 6          | 6          | 392   | 397  | NCS      |
| 6    | T              | 1    | 6          | 6          | 410   | 415  | NCS      |
| 7    | T              | 1    | 6          | 6          | 563   | 568  | NCS      |
| 8    | T              | 1    | 6          | 6          | 778   | 783  | VP2      |
| 9    | GA             | 2    | 3          | 6          | 937   | 942  | VP2      |
| 10   | AT             | 2    | 3          | 6          | 1045  | 1050 | VP2      |
| 11   | TA             | 2    | 3          | 6          | 1197  | 1202 | VP2      |
| 12   | AG             | 2    | 3          | 6          | 1223  | 1228 | VP2      |
| 13   | AGA            | 3    | 5          | 15         | 1486  | 1500 | VP2, VP1 |
| 14   | GAG            | 3    | 3          | 9          | 1516  | 1524 | VP2, VP1 |
| 15   | TGA            | 3    | 4          | 12         | 1718  | 1729 | VP1      |
| 16   | TG             | 2    | 5          | 10         | 1880  | 1889 | VP1      |

|         |   |   |    |      |               |
|---------|---|---|----|------|---------------|
| 17 AG   | 2 | 3 | 6  | 1942 | 1947 VP1      |
| 18 G    | 1 | 6 | 6  | 2006 | 2011 VP1      |
| 19 C    | 1 | 7 | 7  | 2257 | 2263 VP1      |
| 20 T    | 1 | 6 | 6  | 2373 | 2378 VP1      |
| 21 A    | 1 | 6 | 6  | 2632 | 2637 VP1      |
| 22 TC   | 2 | 3 | 6  | 2817 | 2822 LTA      |
| 23 T    | 1 | 7 | 7  | 2971 | 2977 LTA      |
| 24 G    | 1 | 6 | 6  | 3289 | 3294 LTA      |
| 25 TTGC | 4 | 3 | 11 | 3639 | 3649 LTA      |
| 26 T    | 1 | 6 | 6  | 3997 | 4002 LTA      |
| 27 T    | 1 | 6 | 6  | 4100 | 4105 LTA      |
| 28 TA   | 2 | 3 | 6  | 4136 | 4141 LTA      |
| 29 A    | 1 | 6 | 6  | 4144 | 4149 LTA      |
| 30 TA   | 2 | 6 | 11 | 4166 | 4176 LTA      |
| 31 GAA  | 3 | 4 | 12 | 4399 | 4410 LTA      |
| 32 A    | 1 | 6 | 6  | 4438 | 4443 LTA      |
| 33 GAG  | 3 | 4 | 12 | 4450 | 4461 LTA      |
| 34 G    | 1 | 6 | 6  | 4463 | 4468 LTA      |
| 35 TCC  | 3 | 4 | 12 | 4560 | 4571 LTA      |
| 36 AT   | 2 | 3 | 6  | 4656 | 4661 LTA      |
| 37 CT   | 2 | 3 | 6  | 5049 | 5054 STA      |
| 38 GTT  | 3 | 3 | 10 | 5138 | 5147 LTA, STA |
| 39 T    | 1 | 6 | 6  | 5180 | 5185 LTA, STA |

### BM28

| S.No    | Consensus Rep. | Size | Iterations | Tract-size | Start | End  | Protein  |
|---------|----------------|------|------------|------------|-------|------|----------|
| 1 T     |                | 1    | 7          | 7          | 20    | 26   | NCS      |
| 2 CCT   |                | 3    | 3          | 10         | 93    | 102  | NCS      |
| 3 A     |                | 1    | 6          | 6          | 155   | 160  | NCS      |
| 4 T     |                | 1    | 7          | 7          | 574   | 580  | NCS      |
| 5 T     |                | 1    | 6          | 6          | 586   | 591  | NCS      |
| 6 GA    |                | 2    | 3          | 6          | 958   | 963  | VP2      |
| 7 AT    |                | 2    | 3          | 6          | 1066  | 1071 | VP2      |
| 8 AGA   |                | 3    | 5          | 15         | 1504  | 1518 | VP2, VP1 |
| 9 GAG   |                | 3    | 4          | 11         | 1534  | 1544 | VP2, VP1 |
| 10 A    |                | 1    | 7          | 7          | 1583  | 1589 | VP1      |
| 11 A    |                | 1    | 7          | 7          | 1943  | 1949 | VP1      |
| 12 A    |                | 1    | 6          | 6          | 2097  | 2102 | VP1      |
| 13 C    |                | 1    | 7          | 7          | 2263  | 2269 | VP1      |
| 14 T    |                | 1    | 7          | 7          | 2350  | 2356 | VP1      |
| 15 T    |                | 1    | 6          | 6          | 2379  | 2384 | VP1      |
| 16 T    |                | 1    | 8          | 8          | 3127  | 3134 | LTA      |
| 17 TC   |                | 2    | 3          | 6          | 3167  | 3172 | LTA      |
| 18 T    |                | 1    | 7          | 7          | 3405  | 3411 | LTA      |
| 19 T    |                | 1    | 6          | 6          | 3727  | 3732 | LTA      |
| 20 T    |                | 1    | 6          | 6          | 3739  | 3744 | LTA      |
| 21 T    |                | 1    | 6          | 6          | 4113  | 4118 | LTA      |
| 22 TA   |                | 2    | 6          | 11         | 4179  | 4189 | LTA      |
| 23 G    |                | 1    | 6          | 6          | 4342  | 4347 | LTA      |
| 24 GAA  |                | 3    | 4          | 12         | 4415  | 4426 | LTA      |
| 25 A    |                | 1    | 6          | 6          | 4454  | 4459 | LTA      |
| 26 G    |                | 1    | 6          | 6          | 4479  | 4484 | LTA      |
| 27 TGGG |                | 4    | 3          | 13         | 4614  | 4626 | LTA      |
| 28 A    |                | 1    | 11         | 11         | 4691  | 4701 | NCS      |
| 29 T    |                | 1    | 6          | 6          | 4709  | 4714 | NCS      |
| 30 A    |                | 1    | 6          | 6          | 4718  | 4723 | NCS      |
| 31 GT   |                | 2    | 3          | 6          | 4824  | 4829 | STA      |
| 32 CA   |                | 2    | 3          | 6          | 4927  | 4932 | STA      |
| 33 T    |                | 1    | 6          | 6          | 5196  | 5201 | STA, LTA |
| 34 T    |                | 1    | 8          | 8          | 5317  | 5324 | STA, LTA |

### BM29

| S.No  | Consensus Rep. | Size | Iterations | Tract-size | Start | End  | Protein |
|-------|----------------|------|------------|------------|-------|------|---------|
| 1 GA  |                | 2    | 6          | 11         | 127   | 137  | NCS     |
| 2 A   |                | 1    | 7          | 7          | 173   | 179  | NCS     |
| 3 A   |                | 1    | 6          | 6          | 349   | 354  | NCS     |
| 4 GC  |                | 2    | 3          | 6          | 464   | 469  | NCS     |
| 5 G   |                | 1    | 6          | 6          | 495   | 500  | VP2     |
| 6 T   |                | 1    | 6          | 6          | 763   | 768  | VP2     |
| 7 CCT |                | 3    | 3          | 10         | 855   | 864  | VP2     |
| 8 CTT |                | 3    | 3          | 10         | 898   | 907  | VP2     |
| 9 TTA |                | 3    | 3          | 10         | 908   | 917  | VP2     |
| 10 AG |                | 2    | 3          | 6          | 1219  | 1224 | VP2     |

|    |        |   |    |    |      |      |          |
|----|--------|---|----|----|------|------|----------|
| 11 | AGA    | 3 | 4  | 13 | 1424 | 1436 | VP2, VP1 |
| 12 | A      | 1 | 8  | 8  | 1480 | 1487 | VP2, VP1 |
| 13 | A      | 1 | 6  | 6  | 1609 | 1614 | VP1      |
| 14 | AT     | 2 | 3  | 6  | 1846 | 1851 | VP1      |
| 15 | A      | 1 | 6  | 6  | 1987 | 1992 | VP1      |
| 16 | T      | 1 | 7  | 7  | 2226 | 2232 | VP1      |
| 17 | TC     | 2 | 3  | 6  | 2357 | 2362 | VP1      |
| 18 | C      | 1 | 6  | 6  | 2527 | 2532 | VP1      |
| 19 | TG     | 2 | 3  | 6  | 2577 | 2582 | NCS      |
| 20 | T      | 1 | 7  | 7  | 2984 | 2990 | LTA      |
| 21 | T      | 1 | 9  | 9  | 3588 | 3596 | LTA      |
| 22 | CTC    | 3 | 3  | 9  | 3724 | 3732 | LTA      |
| 23 | A      | 1 | 6  | 6  | 3910 | 3915 | LTA      |
| 24 | TCC    | 3 | 4  | 11 | 3936 | 3946 | LTA      |
| 25 | A      | 1 | 6  | 6  | 4082 | 4087 | LTA      |
| 26 | GT     | 2 | 3  | 6  | 4116 | 4121 | LTA      |
| 27 | G      | 1 | 6  | 6  | 4144 | 4149 | LTA      |
| 28 | TCAGGC | 6 | 3  | 18 | 4178 | 4195 | LTA      |
| 29 | C      | 1 | 6  | 6  | 4321 | 4326 | LTA      |
| 30 | A      | 1 | 16 | 16 | 4401 | 4416 | NCS      |
| 31 | C      | 1 | 6  | 6  | 4559 | 4564 | STA      |
| 32 | T      | 1 | 8  | 8  | 4588 | 4595 | STA      |
| 33 | CT     | 2 | 3  | 6  | 4644 | 4649 | STA      |
| 34 | GAA    | 3 | 4  | 12 | 4762 | 4773 | STA, LTA |
| 35 | T      | 1 | 6  | 6  | 4841 | 4846 | STA, LTA |
| 36 | T      | 1 | 6  | 6  | 4899 | 4904 | STA, LTA |

### BM30

| S.No | Consensus Rep. | Size | Iterations | Tract-size | Start | End  | Protein  |
|------|----------------|------|------------|------------|-------|------|----------|
| 1    | CT             | 2    | 6          | 11         | 131   | 141  | NCS      |
| 2    | TA             | 2    | 3          | 6          | 180   | 185  | NCS      |
| 3    | A              | 1    | 6          | 6          | 192   | 197  | NCS      |
| 4    | T              | 1    | 6          | 6          | 521   | 526  | VP2      |
| 5    | T              | 1    | 7          | 7          | 773   | 779  | VP2      |
| 6    | AT             | 2    | 3          | 6          | 982   | 987  | VP2      |
| 7    | AAGAC          | 5    | 3          | 14         | 1001  | 1014 | VP2      |
| 8    | AGA            | 3    | 4          | 11         | 1422  | 1432 | VP2, VP1 |
| 9    | C              | 1    | 7          | 7          | 1436  | 1442 | VP2, VP1 |
| 10   | A              | 1    | 6          | 6          | 1476  | 1481 | VP2, VP1 |
| 11   | G              | 1    | 6          | 6          | 1899  | 1904 | VP1      |
| 12   | A              | 1    | 6          | 6          | 1989  | 1994 | VP1      |
| 13   | A              | 1    | 6          | 6          | 2571  | 2576 | NCS      |
| 14   | AT             | 2    | 3          | 6          | 2662  | 2667 | LTA      |
| 15   | TC             | 2    | 3          | 6          | 3021  | 3026 | LTA      |
| 16   | AG             | 2    | 3          | 6          | 3143  | 3148 | LTA      |
| 17   | A              | 1    | 7          | 7          | 3188  | 3194 | LTA      |
| 18   | T              | 1    | 8          | 8          | 3259  | 3266 | LTA      |
| 19   | T              | 1    | 7          | 7          | 3295  | 3301 | LTA      |
| 20   | T              | 1    | 8          | 8          | 3582  | 3589 | LTA      |
| 21   | AAG            | 3    | 3          | 9          | 3644  | 3652 | LTA      |
| 22   | A              | 1    | 6          | 6          | 3837  | 3842 | LTA      |
| 23   | CA             | 2    | 3          | 6          | 3968  | 3973 | LTA      |
| 24   | TA             | 2    | 4          | 8          | 4027  | 4034 | LTA      |
| 25   | TA             | 2    | 3          | 6          | 4060  | 4065 | LTA      |
| 26   | TTC            | 3    | 6          | 18         | 4247  | 4264 | LTA      |
| 27   | T              | 1    | 18         | 18         | 4554  | 4571 | STA      |
| 28   | T              | 1    | 7          | 7          | 4587  | 4593 | STA      |
| 29   | A              | 1    | 7          | 7          | 4649  | 4655 | STA      |
| 30   | AGA            | 3    | 3          | 9          | 4737  | 4745 | STA, LTA |
| 31   | T              | 1    | 6          | 6          | 4787  | 4792 | STA, LTA |
| 32   | AT             | 2    | 3          | 6          | 4930  | 4935 | STA, LTA |

### BM31

| S.No | Consensus Rep. | Size | Iterations | Tract-size | Start | End  | Protein       |
|------|----------------|------|------------|------------|-------|------|---------------|
| 1    | CCT            | 3    | 3          | 10         | 112   | 121  | NCS           |
| 2    | A              | 1    | 6          | 6          | 174   | 179  | NCS           |
| 3    | T              | 1    | 6          | 6          | 459   | 464  | NCS           |
| 4    | G              | 1    | 6          | 6          | 493   | 498  | VP2           |
| 5    | AT             | 2    | 3          | 6          | 519   | 524  | VP2           |
| 6    | T              | 1    | 8          | 8          | 759   | 766  | VP2           |
| 7    | TTA            | 3    | 3          | 10         | 906   | 915  | VP2, VP3      |
| 8    | AGA            | 3    | 4          | 13         | 1434  | 1446 | VP2, VP1, VP3 |
| 9    | A              | 1    | 7          | 7          | 1482  | 1488 | VP2, VP1, VP3 |

|         |   |   |    |      |      |          |
|---------|---|---|----|------|------|----------|
| 10 AT   | 2 | 3 | 6  | 1847 | 1852 | VP1      |
| 11 GT   | 2 | 3 | 6  | 1871 | 1876 | VP1      |
| 12 A    | 1 | 6 | 6  | 1988 | 1993 | VP1      |
| 13 CA   | 2 | 3 | 6  | 2259 | 2264 | VP1      |
| 14 AG   | 2 | 3 | 6  | 2326 | 2331 | VP1      |
| 15 T    | 1 | 6 | 6  | 2843 | 2848 | LTA      |
| 16 T    | 1 | 7 | 7  | 3263 | 3269 | LTA      |
| 17 T    | 1 | 7 | 7  | 3511 | 3517 | LTA      |
| 18 T    | 1 | 7 | 7  | 3592 | 3598 | LTA      |
| 19 TA   | 2 | 3 | 6  | 3636 | 3641 | LTA      |
| 20 TA   | 2 | 3 | 6  | 3803 | 3808 | LTA      |
| 21 ATAC | 4 | 3 | 12 | 4089 | 4100 | LTA      |
| 22 T    | 1 | 7 | 7  | 4117 | 4123 | LTA      |
| 23 AAG  | 3 | 3 | 9  | 4447 | 4455 | LTA      |
| 24 TTA  | 3 | 4 | 12 | 4649 | 4660 | STA      |
| 25 T    | 1 | 9 | 9  | 4658 | 4666 | STA      |
| 26 CTG  | 3 | 3 | 10 | 4671 | 4680 | STA      |
| 27 T    | 1 | 6 | 6  | 4682 | 4687 | STA      |
| 28 T    | 1 | 6 | 6  | 4755 | 4760 | STA      |
| 29 A    | 1 | 7 | 7  | 4812 | 4818 | STA      |
| 30 T    | 1 | 6 | 6  | 4969 | 4974 | STA, LTA |
| 31 TC   | 2 | 3 | 6  | 5035 | 5040 | STA, LTA |

### BM32

| S.No   | Consensus Rep. | Size | Iterations | Tract-size | Start | End  | Protein       |
|--------|----------------|------|------------|------------|-------|------|---------------|
| 1 A    |                | 1    | 11         | 11         | 119   | 129  | NCS           |
| 2 TG   |                | 2    | 3          | 6          | 327   | 332  | NCS           |
| 3 TC   |                | 2    | 3          | 6          | 403   | 408  | VP2           |
| 4 T    |                | 1    | 6          | 6          | 516   | 521  | VP2           |
| 5 TG   |                | 2    | 3          | 6          | 1074  | 1079 | VP2, VP3, VP1 |
| 6 A    |                | 1    | 6          | 6          | 1107  | 1112 | VP1           |
| 7 G    |                | 1    | 7          | 7          | 1542  | 1548 | VP1           |
| 8 T    |                | 1    | 6          | 6          | 1716  | 1721 | VP1           |
| 9 AT   |                | 2    | 3          | 6          | 2112  | 2117 | VP1           |
| 10 AT  |                | 2    | 3          | 6          | 2159  | 2164 | VP1           |
| 11 GCA |                | 3    | 4          | 12         | 2214  | 2225 | VP1           |
| 12 A   |                | 1    | 6          | 6          | 2469  | 2474 | VP1           |
| 13 TC  |                | 2    | 3          | 6          | 2533  | 2538 | VP1           |
| 14 T   |                | 1    | 7          | 7          | 2717  | 2723 | LTA           |
| 15 TC  |                | 2    | 3          | 6          | 3025  | 3030 | LTA           |
| 16 CA  |                | 2    | 3          | 6          | 3111  | 3116 | LTA           |
| 17 AT  |                | 2    | 3          | 6          | 3366  | 3371 | LTA           |
| 18 T   |                | 1    | 6          | 6          | 3506  | 3511 | LTA           |
| 19 A   |                | 1    | 8          | 8          | 3528  | 3535 | LTA           |
| 20 AG  |                | 2    | 3          | 6          | 3583  | 3588 | LTA           |
| 21 T   |                | 1    | 8          | 8          | 4118  | 4125 | LTA           |
| 22 CTT |                | 3    | 5          | 14         | 4192  | 4205 | LTA           |
| 23 TC  |                | 2    | 3          | 6          | 4214  | 4219 | LTA           |
| 24 G   |                | 1    | 6          | 6          | 4382  | 4387 | LTA           |
| 25 TCT |                | 3    | 3          | 9          | 4491  | 4499 | LTA           |
| 26 AT  |                | 2    | 3          | 6          | 4656  | 4661 | STA           |

### BM33

| S.No   | Consensus Rep. | Size | Iterations | Tract-size | Start | End  | Protein |
|--------|----------------|------|------------|------------|-------|------|---------|
| 1 CT   |                | 2    | 3          | 6          | 54    | 59   | NCS     |
| 2 CCT  |                | 3    | 3          | 6          | 62    | 71   | NCS     |
| 3 A    |                | 1    | 11         | 6          | 119   | 129  | NCS     |
| 4 TC   |                | 2    | 3          | 6          | 401   | 406  | VP2     |
| 5 T    |                | 1    | 6          | 6          | 514   | 519  | VP2     |
| 6 A    |                | 1    | 6          | 6          | 1105  | 1110 | VP1     |
| 7 GA   |                | 2    | 3          | 6          | 1247  | 1252 | VP1     |
| 8 A    |                | 1    | 8          | 6          | 1252  | 1259 | VP1     |
| 9 T    |                | 1    | 6          | 6          | 1714  | 1719 | VP1     |
| 10 GCA |                | 3    | 4          | 6          | 2212  | 2223 | VP1     |
| 11 TC  |                | 2    | 3          | 6          | 2522  | 2527 | VP1     |
| 12 T   |                | 1    | 6          | 6          | 2694  | 2699 | LTA     |
| 13 ATT |                | 3    | 3          | 6          | 2748  | 2757 | LTA     |
| 14 TC  |                | 2    | 3          | 6          | 3014  | 3019 | LTA     |
| 15 T   |                | 1    | 6          | 6          | 3058  | 3063 | LTA     |
| 16 CA  |                | 2    | 3          | 6          | 3100  | 3105 | LTA     |
| 17 AT  |                | 2    | 3          | 6          | 3355  | 3360 | LTA     |
| 18 T   |                | 1    | 6          | 6          | 3377  | 3382 | LTA     |
| 19 T   |                | 1    | 6          | 6          | 3495  | 3500 | LTA     |

|        |   |   |   |      |               |
|--------|---|---|---|------|---------------|
| 20 A   | 1 | 8 | 6 | 3517 | 3524 LTA      |
| 21 TA  | 2 | 3 | 6 | 3631 | 3636 LTA      |
| 22 T   | 1 | 8 | 6 | 4107 | 4114 LTA      |
| 23 CTT | 3 | 5 | 6 | 4181 | 4194 LTA      |
| 24 TC  | 2 | 3 | 6 | 4203 | 4208 LTA      |
| 25 CTC | 3 | 4 | 6 | 4378 | 4389 LTA      |
| 26 A   | 1 | 6 | 6 | 4578 | 4583 STA      |
| 27 AT  | 2 | 3 | 6 | 4648 | 4653 STA      |
| 28 T   | 1 | 6 | 6 | 4987 | 4992 STA, LTA |
| 29 T   | 1 | 6 | 6 | 5119 | 5124 STA, LTA |

#### BM34

| S.No | Consensus Rep. | Size | Iterations | Tract-size | Start | End  | Protein       |
|------|----------------|------|------------|------------|-------|------|---------------|
| 1    | GCA            | 3    | 3          | 9          | 46    | 54   | NCS           |
| 2    | CCT            | 3    | 3          | 10         | 84    | 93   | NCS           |
| 3    | GCCT           | 4    | 3          | 11         | 123   | 133  | NCS           |
| 4    | A              | 1    | 6          | 6          | 148   | 153  | NCS           |
| 5    | CT             | 2    | 3          | 6          | 182   | 187  | NCS           |
| 6    | GTTT           | 4    | 3          | 12         | 293   | 304  | NCS           |
| 7    | T              | 1    | 7          | 7          | 558   | 564  | NCS           |
| 8    | T              | 1    | 6          | 6          | 570   | 575  | NCS           |
| 9    | GA             | 2    | 3          | 6          | 942   | 947  | VP2, VP3      |
| 10   | AG             | 2    | 3          | 6          | 1303  | 1308 | VP2, VP3      |
| 11   | AG             | 2    | 3          | 6          | 1344  | 1349 | VP2, VP3      |
| 12   | AGA            | 3    | 5          | 15         | 1488  | 1502 | VP2, VP3, VP1 |
| 13   | GAG            | 3    | 3          | 9          | 1518  | 1526 | VP2, VP3, VP1 |
| 14   | A              | 1    | 7          | 7          | 1561  | 1567 | VP1           |
| 15   | ACT            | 3    | 4          | 12         | 1733  | 1744 | VP1           |
| 16   | A              | 1    | 7          | 7          | 2074  | 2080 | VP1           |
| 17   | A              | 1    | 6          | 6          | 2104  | 2109 | VP1           |
| 18   | TAAA           | 4    | 3          | 11         | 2713  | 2723 | NCS           |
| 19   | T              | 1    | 7          | 7          | 2990  | 2996 | LTA           |
| 20   | T              | 1    | 6          | 6          | 3005  | 3010 | LTA           |
| 21   | T              | 1    | 8          | 8          | 3133  | 3140 | LTA           |
| 22   | T              | 1    | 7          | 7          | 3411  | 3417 | LTA           |
| 23   | CTG            | 3    | 4          | 13         | 3633  | 3645 | LTA           |
| 24   | T              | 1    | 6          | 6          | 3733  | 3738 | LTA           |
| 25   | A              | 1    | 6          | 6          | 3983  | 3988 | LTA           |
| 26   | TA             | 2    | 6          | 11         | 4185  | 4195 | LTA           |
| 27   | GAA            | 3    | 4          | 12         | 4421  | 4432 | LTA           |
| 28   | A              | 1    | 6          | 6          | 4460  | 4465 | LTA           |
| 29   | G              | 1    | 6          | 6          | 4485  | 4490 | LTA           |
| 30   | GCT            | 3    | 4          | 11         | 4510  | 4520 | LTA           |
| 31   | T              | 1    | 6          | 6          | 4724  | 4729 | NCS           |
| 32   | AT             | 2    | 3          | 6          | 4777  | 4782 | STA           |
| 33   | T              | 1    | 7          | 7          | 4848  | 4854 | STA           |
| 34   | CA             | 2    | 3          | 6          | 4936  | 4941 | STA           |
| 35   | AC             | 2    | 3          | 6          | 5005  | 5010 | STA           |
| 36   | CA             | 2    | 3          | 6          | 5099  | 5104 | STA           |

#### BM35

| S.No | Consensus Rep. | Size | Iterations | Tract-size | Start | End  | Protein   |
|------|----------------|------|------------|------------|-------|------|-----------|
| 1    | C              | 1    | 7          | 7          | 78    | 84   | NCS       |
| 2    | A              | 1    | 7          | 7          | 214   | 220  | NCS       |
| 3    | A              | 1    | 6          | 6          | 351   | 356  | NCS       |
| 4    | T              | 1    | 6          | 6          | 560   | 565  | NCS       |
| 5    | TG             | 2    | 3          | 6          | 1064  | 1069 | VP2, VP3, |
| 6    | A              | 1    | 6          | 6          | 1297  | 1302 | VP2, VP3, |
| 7    | ATG            | 3    | 3          | 10         | 1876  | 1885 | VP1       |
| 8    | TGAA           | 4    | 3          | 12         | 1908  | 1919 | VP1       |
| 9    | A              | 1    | 6          | 6          | 2361  | 2366 | VP1       |
| 10   | C              | 1    | 6          | 6          | 2556  | 2561 | VP1       |
| 11   | TA             | 2    | 3          | 6          | 2651  | 2656 | NCS       |
| 12   | TTC            | 3    | 5          | 15         | 2710  | 2724 | LTA       |
| 13   | AT             | 2    | 3          | 6          | 2807  | 2812 | LTA       |
| 14   | T              | 1    | 7          | 7          | 3092  | 3098 | LTA       |
| 15   | T              | 1    | 7          | 7          | 3369  | 3375 | LTA       |
| 16   | A              | 1    | 6          | 6          | 3947  | 3952 | LTA       |
| 17   | GT             | 2    | 3          | 6          | 3964  | 3969 | LTA       |
| 18   | TA             | 2    | 3          | 6          | 4119  | 4124 | LTA       |
| 19   | G              | 1    | 6          | 6          | 4271  | 4276 | LTA       |
| 20   | CTT            | 3    | 5          | 15         | 4283  | 4297 | LTA       |
| 21   | AT             | 2    | 3          | 6          | 4607  | 4612 | STA       |

|       |   |   |   |      |               |
|-------|---|---|---|------|---------------|
| 22 AG | 2 | 3 | 6 | 5151 | 5156 LTA, STA |
|-------|---|---|---|------|---------------|

**BM36**

| SI No. | Consensus Rep. | Size | Iterations | Tract-size | Start | End  | Protein  |
|--------|----------------|------|------------|------------|-------|------|----------|
| 1      | GA             | 2    | 3          | 6          | 25    | 30   | STA, LTA |
| 2      | A              | 1    | 6          | 6          | 103   | 108  | STA, LTA |
| 3      | A              | 1    | 13         | 13         | 391   | 403  | STA      |
| 4      | T              | 1    | 6          | 6          | 481   | 486  | STA      |
| 5      | TA             | 2    | 3          | 6          | 627   | 632  | STA, LTA |
| 6      | AG             | 2    | 3          | 6          | 649   | 654  | STA, LTA |
| 7      | TCACCA         | 6    | 4          | 24         | 913   | 936  | STA, LTA |
| 8      | AG             | 2    | 3          | 6          | 1096  | 1101 | STA, LTA |
| 9      | CT             | 2    | 3          | 6          | 1219  | 1224 | STA, LTA |
| 10     | GT             | 2    | 3          | 6          | 1804  | 1809 | STA, LTA |
| 11     | A              | 1    | 7          | 7          | 2014  | 2020 | STA, LTA |
| 12     | GT             | 2    | 3          | 6          | 2170  | 2175 | STA, LTA |
| 13     | GA             | 2    | 3          | 6          | 2290  | 2295 | STA, LTA |
| 14     | AG             | 2    | 3          | 6          | 2471  | 2476 | STA, LTA |
| 15     | AT             | 2    | 3          | 6          | 2753  | 2758 | VP1      |
| 16     | AT             | 2    | 3          | 6          | 2800  | 2805 | VP1      |
| 17     | A              | 1    | 6          | 6          | 2990  | 2995 | VP1      |
| 18     | T              | 1    | 6          | 6          | 3260  | 3265 | VP1      |
| 19     | A              | 1    | 7          | 7          | 3965  | 3971 | VP2, VP3 |
| 20     | TC             | 2    | 3          | 6          | 4014  | 4019 | VP2, VP3 |
| 21     | CA             | 2    | 3          | 6          | 4104  | 4109 | VP2, VP3 |
| 22     | TCT            | 3    | 4          | 11         | 4204  | 4214 | VP2, VP3 |
| 23     | C              | 1    | 6          | 6          | 4575  | 4580 | VP2      |
| 24     | A              | 1    | 6          | 6          | 4587  | 4592 | NCS      |
| 25     | A              | 1    | 7          | 7          | 4610  | 4616 | NCS      |
| 26     | A              | 1    | 7          | 7          | 4643  | 4649 | NCS      |
| 27     | A              | 1    | 8          | 8          | 4691  | 4698 | NCS      |
| 28     | TTC            | 3    | 3          | 10         | 4700  | 4709 | NCS      |
| 29     | CT             | 2    | 3          | 6          | 4748  | 4753 | NCS      |
| 30     | T              | 1    | 6          | 6          | 4777  | 4782 | NCS      |
| 31     | T              | 1    | 6          | 6          | 4875  | 4880 | NCS      |
| 32     | GCT            | 3    | 4          | 12         | 4943  | 4954 | NCS      |

**BM37**

| SI No. | Consensus Rep. | Size | Iterations | Tract-size | Start | End  | Protein  |
|--------|----------------|------|------------|------------|-------|------|----------|
| 1      | A              | 1    | 6          | 6          | 22    | 27   | NCS      |
| 2      | CCT            | 3    | 3          | 10         | 136   | 145  | NCS      |
| 3      | A              | 1    | 8          | 8          | 197   | 204  | NCS      |
| 4      | TG             | 2    | 3          | 6          | 382   | 387  | NCS      |
| 5      | T              | 1    | 6          | 6          | 490   | 495  | NCS      |
| 6      | CTG            | 3    | 3          | 9          | 672   | 680  | VP2      |
| 7      | AG             | 2    | 3          | 6          | 1010  | 1015 | VP2      |
| 8      | A              | 1    | 6          | 6          | 1398  | 1403 | VP2      |
| 9      | AGA            | 3    | 4          | 12         | 1405  | 1416 | VP2, VP1 |
| 10     | G              | 1    | 7          | 7          | 1527  | 1533 | VP1      |
| 11     | ATG            | 3    | 3          | 10         | 1848  | 1857 | VP1      |
| 12     | T              | 1    | 7          | 7          | 1898  | 1904 | VP1      |
| 13     | TC             | 2    | 3          | 6          | 2228  | 2233 | VP1      |
| 14     | TG             | 2    | 3          | 6          | 2235  | 2240 | VP1      |
| 15     | AG             | 2    | 3          | 6          | 2579  | 2584 | NCS      |
| 16     | TCA            | 3    | 4          | 12         | 2683  | 2694 | LTA      |
| 17     | CT             | 2    | 3          | 6          | 2818  | 2823 | LTA      |
| 18     | G              | 1    | 6          | 6          | 3022  | 3027 | LTA      |
| 19     | GCT            | 3    | 3          | 9          | 3277  | 3285 | LTA      |
| 20     | CT             | 2    | 3          | 6          | 3507  | 3512 | LTA      |
| 21     | TTGC           | 4    | 3          | 13         | 3537  | 3549 | LTA      |
| 22     | AC             | 2    | 3          | 6          | 3570  | 3575 | LTA      |
| 23     | AGT            | 3    | 4          | 11         | 4074  | 4084 | LTA      |
| 24     | G              | 1    | 8          | 8          | 4197  | 4204 | LTA      |
| 25     | G              | 1    | 13         | 13         | 4229  | 4241 | LTA      |
| 26     | CT             | 2    | 3          | 6          | 4350  | 4355 | NCS      |
| 27     | AT             | 2    | 6          | 11         | 4454  | 4464 | NCS      |
| 28     | CT             | 2    | 3          | 6          | 4569  | 4574 | NCS      |
| 29     | GT             | 2    | 4          | 8          | 4578  | 4585 | NCS      |
| 30     | AC             | 2    | 3          | 6          | 4698  | 4703 | NCS      |
| 31     | CT             | 2    | 3          | 6          | 5024  | 5029 | LTA      |

**BM38**

| SI No. | Consensus | Rep. Size | Iterations | Tract-size | Start | End  | Protein  |
|--------|-----------|-----------|------------|------------|-------|------|----------|
| 1      | TC        | 2         | 4          | 8          | 5     | 12   | NCS      |
| 2      | TG        | 2         | 3          | 6          | 40    | 45   | NCS      |
| 3      | T         | 1         | 6          | 6          | 86    | 91   | NCS      |
| 4      | CCT       | 3         | 3          | 10         | 138   | 147  | NCS      |
| 5      | CT        | 2         | 3          | 6          | 186   | 191  | NCS      |
| 6      | A         | 1         | 7          | 7          | 201   | 207  | NCS      |
| 7      | GT        | 2         | 3          | 6          | 1454  | 1459 | VP1      |
| 8      | CAGC      | 4         | 3          | 12         | 1680  | 1691 | VP1      |
| 9      | AC        | 2         | 3          | 6          | 1752  | 1757 | VP1      |
| 10     | CA        | 2         | 3          | 6          | 2140  | 2145 | VP1      |
| 11     | AT        | 2         | 3          | 6          | 2506  | 2511 | VP1      |
| 12     | CA        | 2         | 3          | 6          | 2674  | 2679 | LTA      |
| 13     | AG        | 2         | 3          | 6          | 2721  | 2726 | LTA      |
| 14     | AC        | 2         | 3          | 6          | 2789  | 2794 | LTA      |
| 15     | T         | 1         | 6          | 6          | 2960  | 2965 | LTA      |
| 16     | TA        | 2         | 3          | 6          | 4044  | 4049 | LTA, MTA |
| 17     | GAT       | 3         | 3          | 9          | 4497  | 4505 | LTA, MTA |
| 18     | TC        | 2         | 4          | 8          | 4530  | 4537 | LTA, MTA |
| 19     | CTG       | 3         | 3          | 10         | 4652  | 4661 | LTA, MTA |
| 20     | C         | 1         | 6          | 6          | 4723  | 4728 | NCS      |
| 21     | C         | 1         | 6          | 6          | 5243  | 5248 | LTA, MTA |
| 22     | T         | 1         | 6          | 6          | 5288  | 5293 | LTA, MTA |

### BM39

| S.No | Consensus | Rep. Size | Iterations | Tract-size | Start | End  | PROTEIN  |
|------|-----------|-----------|------------|------------|-------|------|----------|
| 1    | A         | 1         | 6          | 6          | 19    | 24   | NCS      |
| 2    | T         | 1         | 6          | 6          | 71    | 76   | NCS      |
| 3    | TA        | 2         | 3          | 6          | 112   | 117  | NCS      |
| 4    | A         | 1         | 10         | 10         | 120   | 129  | NCS      |
| 5    | TTA       | 3         | 4          | 12         | 325   | 336  | NCS      |
| 6    | AAAT      | 4         | 3          | 13         | 365   | 377  | NCS      |
| 7    | T         | 1         | 6          | 6          | 659   | 664  | NCS      |
| 8    | TC        | 2         | 3          | 6          | 851   | 856  | VP2      |
| 9    | CT        | 2         | 3          | 6          | 879   | 884  | VP2      |
| 10   | CAG       | 3         | 3          | 9          | 968   | 976  | VP2      |
| 11   | T         | 1         | 7          | 7          | 1070  | 1076 | VP2      |
| 12   | TA        | 2         | 3          | 6          | 1111  | 1116 | VP2      |
| 13   | AG        | 2         | 3          | 6          | 1228  | 1233 | VP2      |
| 14   | GT        | 2         | 3          | 6          | 1256  | 1261 | VP2      |
| 15   | G         | 1         | 7          | 7          | 1495  | 1501 | VP2      |
| 16   | AGA       | 3         | 4          | 12         | 1596  | 1607 | VP2      |
| 17   | GGA       | 3         | 7          | 21         | 1599  | 1619 | VP2      |
| 18   | A         | 1         | 6          | 6          | 1654  | 1659 | VP2, VP1 |
| 19   | A         | 1         | 6          | 6          | 1864  | 1869 | VP1      |
| 20   | G         | 1         | 8          | 8          | 2086  | 2093 | VP1      |
| 21   | AT        | 2         | 3          | 6          | 2418  | 2423 | VP1      |
| 22   | A         | 1         | 7          | 7          | 2447  | 2453 | VP1      |
| 23   | TG        | 2         | 3          | 6          | 2806  | 2811 | LTA      |
| 24   | GA        | 2         | 3          | 6          | 2903  | 2908 | LTA      |
| 25   | T         | 1         | 6          | 6          | 3061  | 3066 | LTA      |
| 26   | T         | 1         | 6          | 6          | 3165  | 3170 | LTA      |
| 27   | T         | 1         | 6          | 6          | 3180  | 3185 | LTA      |
| 28   | A         | 1         | 6          | 6          | 3444  | 3449 | LTA      |
| 29   | T         | 1         | 7          | 7          | 3458  | 3464 | LTA      |
| 30   | T         | 1         | 6          | 6          | 3608  | 3613 | LTA      |
| 31   | CA        | 2         | 3          | 6          | 3875  | 3880 | LTA      |
| 32   | T         | 1         | 6          | 6          | 3922  | 3927 | LTA      |
| 33   | A         | 1         | 6          | 6          | 3948  | 3953 | LTA      |
| 34   | AATT      | 4         | 3          | 11         | 4088  | 4098 | LTA      |
| 35   | T         | 1         | 6          | 6          | 4226  | 4231 | LTA      |
| 36   | T         | 1         | 6          | 6          | 4332  | 4337 | LTA      |
| 37   | T         | 1         | 6          | 6          | 4342  | 4347 | LTA      |
| 38   | CTC       | 3         | 4          | 12         | 4407  | 4418 | LTA      |
| 39   | A         | 1         | 6          | 6          | 4508  | 4513 | NCS      |
| 40   | TTA       | 3         | 3          | 10         | 4531  | 4540 | STA      |

### BM40

| S.No | Consensus | Rep. Size | Iterations | Tract-size | Start | End | PROTEIN |
|------|-----------|-----------|------------|------------|-------|-----|---------|
| 1    | AG        | 2         | 3          | 6          | 19    | 24  | NCS     |
| 2    | CT        | 2         | 3          | 6          | 31    | 36  | NCS     |
| 3    | TA        | 2         | 3          | 6          | 37    | 42  | NCS     |
| 4    | GC        | 2         | 3          | 6          | 53    | 58  | NCS     |

|         |   |   |    |      |               |
|---------|---|---|----|------|---------------|
| 5 A     | 1 | 6 | 6  | 66   | 71 NCS        |
| 6 CCT   | 3 | 3 | 10 | 82   | 91 NCS        |
| 7 CCT   | 3 | 3 | 9  | 128  | 136 NCS       |
| 8 A     | 1 | 9 | 9  | 144  | 152 NCS       |
| 9 T     | 1 | 8 | 8  | 247  | 254 NCS       |
| 10 T    | 1 | 7 | 7  | 302  | 308 NCS       |
| 11 T    | 1 | 7 | 7  | 346  | 352 NCS       |
| 12 T    | 1 | 6 | 6  | 448  | 453 VP2       |
| 13 A    | 1 | 6 | 6  | 916  | 921 VP2       |
| 14 AC   | 2 | 3 | 6  | 1121 | 1126 VP2, VP1 |
| 15 GCT  | 3 | 4 | 12 | 1161 | 1172 VP1      |
| 16 TG   | 2 | 3 | 6  | 1182 | 1187 VP1      |
| 17 A    | 1 | 6 | 6  | 1829 | 1834 VP1      |
| 18 AT   | 2 | 3 | 6  | 2237 | 2242 VP1      |
| 19 CTG  | 3 | 4 | 11 | 2299 | 2309 VP1      |
| 20 CCT  | 3 | 4 | 12 | 2415 | 2426 VP1      |
| 21 A    | 1 | 8 | 8  | 2498 | 2505 NCS      |
| 22 TCT  | 3 | 8 | 24 | 2558 | 2581 LTA      |
| 23 CAT  | 3 | 3 | 9  | 2685 | 2693 LTA      |
| 24 T    | 1 | 6 | 6  | 2935 | 2940 LTA      |
| 25 A    | 1 | 6 | 6  | 3152 | 3157 LTA      |
| 26 T    | 1 | 7 | 7  | 3213 | 3219 LTA      |
| 27 CT   | 2 | 3 | 6  | 3385 | 3390 LTA      |
| 28 TG   | 2 | 3 | 6  | 3516 | 3521 LTA      |
| 29 A    | 1 | 7 | 7  | 3927 | 3933 LTA      |
| 30 T    | 1 | 6 | 6  | 4058 | 4063 LTA      |
| 31 GTC  | 3 | 4 | 13 | 4144 | 4156 LTA      |
| 32 G    | 1 | 6 | 6  | 4174 | 4179 LTA      |
| 33 ATC  | 3 | 3 | 9  | 4285 | 4293 LTA      |
| 34 AT   | 2 | 4 | 8  | 4321 | 4328 LTA      |
| 35 CTG  | 3 | 4 | 12 | 4417 | 4428 LTA      |
| 36 CTG  | 3 | 6 | 18 | 4441 | 4458 LTA      |
| 37 TGC  | 3 | 5 | 15 | 4535 | 4549 LTA      |
| 38 GAT  | 3 | 3 | 9  | 4574 | 4582 LTA      |
| 39 AT   | 2 | 3 | 6  | 4702 | 4707 LTA      |
| 40 A    | 1 | 6 | 6  | 4734 | 4739 NCS      |
| 41 TTAC | 4 | 3 | 12 | 4800 | 4811 NCS      |
| 42 CT   | 2 | 3 | 6  | 4845 | 4850 STA      |
| 43 CA   | 2 | 3 | 6  | 5038 | 5043 STA      |
| 44 T    | 1 | 6 | 6  | 5218 | 5223 STA, LTA |
| 45 AG   | 2 | 3 | 6  | 5354 | 5359 STA, LTA |

#### BM41

| S.No | Consensus Rep. | Size | Iterations | Tract-size | Start | End  | PROTEIN  |
|------|----------------|------|------------|------------|-------|------|----------|
| 1    | CCT            | 3    | 3          | 10         | 43    | 52   | NCS      |
| 2    | AGG            | 3    | 3          | 10         | 65    | 74   | NCS      |
| 3    | TA             | 2    | 3          | 6          | 93    | 98   | NCS      |
| 4    | A              | 1    | 7          | 7          | 104   | 110  | NCS      |
| 5    | TG             | 2    | 3          | 6          | 294   | 299  | NCS      |
| 6    | AAAG           | 4    | 4          | 16         | 330   | 345  | NCS      |
| 7    | A              | 1    | 7          | 7          | 394   | 400  | NCS      |
| 8    | AG             | 2    | 3          | 6          | 649   | 654  | NCS      |
| 9    | TGC            | 3    | 4          | 11         | 1030  | 1040 | VP2      |
| 10   | GA             | 2    | 3          | 6          | 1273  | 1278 | VP2      |
| 11   | TC             | 2    | 3          | 6          | 1362  | 1367 | VP2      |
| 12   | AGA            | 3    | 5          | 15         | 1642  | 1656 | VP2, VP1 |
| 13   | C              | 1    | 6          | 6          | 1659  | 1664 | VP2, VP1 |
| 14   | A              | 1    | 7          | 7          | 1665  | 1671 | VP2, VP1 |
| 15   | TG             | 2    | 6          | 11         | 2005  | 2015 | VP1      |
| 16   | AG             | 2    | 3          | 6          | 2031  | 2036 | VP1      |
| 17   | T              | 1    | 7          | 7          | 2081  | 2087 | VP1      |
| 18   | AT             | 2    | 3          | 6          | 2117  | 2122 | VP1      |
| 19   | GA             | 2    | 5          | 10         | 2504  | 2513 | VP1      |
| 20   | A              | 1    | 6          | 6          | 2692  | 2697 | VP1      |
| 21   | TG             | 2    | 3          | 6          | 2770  | 2775 | LTA      |
| 22   | TA             | 2    | 3          | 6          | 2898  | 2903 | LTA      |
| 23   | T              | 1    | 7          | 7          | 3155  | 3161 | LTA      |
| 24   | T              | 1    | 7          | 7          | 3172  | 3178 | LTA      |
| 25   | CAA            | 3    | 4          | 11         | 3467  | 3477 | LTA      |
| 26   | AT             | 2    | 3          | 6          | 3587  | 3592 | LTA      |
| 27   | T              | 1    | 7          | 7          | 3599  | 3605 | LTA      |
| 28   | CTG            | 3    | 3          | 10         | 3692  | 3701 | LTA      |
| 29   | TA             | 2    | 3          | 6          | 3836  | 3841 | LTA      |
| 30   | A              | 1    | 7          | 7          | 3853  | 3859 | LTA      |

|       |   |    |    |      |               |
|-------|---|----|----|------|---------------|
| 31 CA | 2 | 3  | 6  | 3866 | 3871 LTA      |
| 32 T  | 1 | 6  | 6  | 4208 | 4213 LTA      |
| 33 A  | 1 | 6  | 6  | 4273 | 4278 LTA      |
| 34 T  | 1 | 14 | 14 | 4319 | 4332 LTA      |
| 35 T  | 1 | 6  | 6  | 4379 | 4384 LTA      |
| 36 TC | 2 | 3  | 6  | 4679 | 4684 STA      |
| 37 A  | 1 | 6  | 6  | 4695 | 4700 STA      |
| 38 A  | 1 | 7  | 7  | 4748 | 4754 STA      |
| 39 A  | 1 | 6  | 6  | 4910 | 4915 STA, LTA |

#### BM42

| S.No   | Consensus Rep. | Size | Iterations | Tract-size | Start | End  | PROTEIN  |
|--------|----------------|------|------------|------------|-------|------|----------|
| 1 T    |                | 1    | 8          | 8          | 10    | 17   | NCS      |
| 2 A    |                | 1    | 7          | 7          | 30    | 36   | NCS      |
| 3 T    |                | 1    | 6          | 6          | 54    | 59   | NCS      |
| 4 TA   |                | 2    | 6          | 11         | 132   | 142  | NCS      |
| 5 A    |                | 1    | 9          | 9          | 142   | 150  | NCS      |
| 6 A    |                | 1    | 6          | 6          | 541   | 546  | AgP      |
| 7 A    |                | 1    | 6          | 6          | 589   | 594  | AgP      |
| 8 GCT  |                | 3    | 4          | 12         | 687   | 698  | VP2      |
| 9 GCT  |                | 3    | 5          | 14         | 735   | 748  | VP2      |
| 10 T   |                | 1    | 6          | 6          | 933   | 938  | VP2      |
| 11 GA  |                | 2    | 3          | 6          | 1188  | 1193 | VP2      |
| 12 T   |                | 1    | 6          | 6          | 1194  | 1199 | VP2      |
| 13 A   |                | 1    | 7          | 7          | 1433  | 1439 | VP2      |
| 14 A   |                | 1    | 6          | 6          | 1471  | 1476 | VP2      |
| 15 A   |                | 1    | 7          | 7          | 1828  | 1834 | VP1      |
| 16 A   |                | 1    | 6          | 6          | 1982  | 1987 | VP1      |
| 17 T   |                | 1    | 8          | 8          | 2034  | 2041 | VP1      |
| 18 AT  |                | 2    | 3          | 6          | 2628  | 2633 | VP1      |
| 19 CAA |                | 3    | 4          | 13         | 2647  | 2659 | VP1      |
| 20 AT  |                | 2    | 6          | 11         | 2980  | 2990 | LTA      |
| 21 CA  |                | 2    | 3          | 6          | 3602  | 3607 | LTA      |
| 22 A   |                | 1    | 6          | 6          | 3612  | 3617 | LTA      |
| 23 AT  |                | 2    | 3          | 6          | 3620  | 3625 | LTA      |
| 24 CT  |                | 2    | 3          | 6          | 3790  | 3795 | LTA      |
| 25 CTG |                | 3    | 3          | 10         | 3817  | 3826 | LTA      |
| 26 T   |                | 1    | 6          | 6          | 3835  | 3840 | LTA      |
| 27 T   |                | 1    | 6          | 6          | 3914  | 3919 | LTA      |
| 28 A   |                | 1    | 6          | 6          | 4247  | 4252 | LTA      |
| 29 T   |                | 1    | 6          | 6          | 4316  | 4321 | LTA      |
| 30 T   |                | 1    | 6          | 6          | 4455  | 4460 | LTA      |
| 31 TC  |                | 2    | 3          | 6          | 4697  | 4702 | STA      |
| 32 CT  |                | 2    | 3          | 6          | 4758  | 4763 | STA      |
| 33 T   |                | 1    | 6          | 6          | 4837  | 4842 | STA      |
| 34 CT  |                | 2    | 3          | 6          | 5166  | 5171 | STA, LTA |

#### BM43

| S.No   | Consensus Rep. | Size | Iterations | Tract-size | Start | End  | PROTEIN       |
|--------|----------------|------|------------|------------|-------|------|---------------|
| 1 T    |                | 1    | 6          | 6          | 10    | 15   | NCS           |
| 2 A    |                | 1    | 7          | 7          | 19    | 25   | NCS           |
| 3 A    |                | 1    | 6          | 6          | 29    | 34   | NCS           |
| 4 CTTA |                | 4    | 3          | 11         | 73    | 83   | NCS           |
| 5 TAT  |                | 3    | 3          | 10         | 120   | 129  | NCS           |
| 6 A    |                | 1    | 9          | 9          | 130   | 138  | NCS           |
| 7 A    |                | 1    | 6          | 6          | 528   | 533  | AgP           |
| 8 A    |                | 1    | 6          | 6          | 570   | 575  | AgP           |
| 9 T    |                | 1    | 8          | 8          | 593   | 600  | NCS           |
| 10 GCT |                | 3    | 4          | 12         | 665   | 676  | VP2           |
| 11 GCT |                | 3    | 4          | 12         | 713   | 724  | VP2           |
| 12 GAG |                | 3    | 4          | 12         | 1645  | 1656 | VP2, VP3, VP1 |
| 13 A   |                | 1    | 7          | 7          | 1803  | 1809 | VP1           |
| 14 T   |                | 1    | 7          | 7          | 2010  | 2016 | VP1           |
| 15 GT  |                | 2    | 3          | 6          | 2047  | 2052 | VP1           |
| 16 GA  |                | 2    | 5          | 10         | 2429  | 2438 | VP1           |
| 17 T   |                | 1    | 6          | 6          | 2757  | 2762 | LTA           |
| 18 AC  |                | 2    | 3          | 6          | 2766  | 2771 | LTA           |
| 19 CA  |                | 2    | 3          | 6          | 3485  | 3490 | LTA           |
| 20 CT  |                | 2    | 3          | 6          | 3741  | 3746 | LTA           |
| 21 T   |                | 1    | 7          | 7          | 3770  | 3776 | LTA           |
| 22 T   |                | 1    | 6          | 6          | 3812  | 3817 | LTA           |
| 23 T   |                | 1    | 6          | 6          | 3891  | 3896 | LTA           |
| 24 CT  |                | 2    | 3          | 6          | 4098  | 4103 | LTA           |

|         |   |   |    |      |               |
|---------|---|---|----|------|---------------|
| 25 TA   | 2 | 3 | 6  | 4115 | 4120 LTA      |
| 26 A    | 1 | 6 | 6  | 4153 | 4158 LTA      |
| 27 CTTT | 4 | 3 | 13 | 4422 | 4434 LTA      |
| 28 CAA  | 3 | 3 | 9  | 4581 | 4589 NCS      |
| 29 CA   | 2 | 3 | 6  | 4864 | 4869 STA      |
| 30 GT   | 2 | 3 | 6  | 4996 | 5001 STA, LTA |

#### BM44

| S.No   | Consensus Rep. | Size | Iterations | Tract-size | Start         | End | PROTEIN |
|--------|----------------|------|------------|------------|---------------|-----|---------|
| 1 A    | 1              | 8    | 8          | 143        | 150 NCS       |     |         |
| 2 ATG  | 3              | 4    | 11         | 236        | 246 NCS       |     |         |
| 3 G    | 1              | 6    | 6          | 251        | 256 NCS       |     |         |
| 4 T    | 1              | 6    | 6          | 742        | 747 NCS       |     |         |
| 5 T    | 1              | 6    | 6          | 762        | 767 NCS       |     |         |
| 6 T    | 1              | 8    | 8          | 1175       | 1182 VP2, VP3 |     |         |
| 7 G    | 1              | 7    | 7          | 1585       | 1591 VP2, VP3 |     |         |
| 8 C    | 1              | 6    | 6          | 1923       | 1928 VP1      |     |         |
| 9 TAA  | 3              | 3    | 9          | 2500       | 2508 VP1      |     |         |
| 10 TCT | 3              | 7    | 21         | 2930       | 2950 LTA      |     |         |
| 11 G   | 1              | 6    | 6          | 3269       | 3274 LTA      |     |         |
| 12 T   | 1              | 8    | 8          | 3301       | 3308 LTA      |     |         |
| 13 AT  | 2              | 3    | 6          | 3428       | 3433 LTA      |     |         |
| 14 TGC | 3              | 3    | 9          | 3520       | 3528 LTA      |     |         |
| 15 T   | 1              | 7    | 7          | 3789       | 3795 LTA      |     |         |
| 16 C   | 1              | 6    | 6          | 4081       | 4086 LTA      |     |         |
| 17 T   | 1              | 6    | 6          | 4192       | 4197 LTA      |     |         |
| 18 T   | 1              | 6    | 6          | 4315       | 4320 LTA      |     |         |
| 19 T   | 1              | 6    | 6          | 4335       | 4340 LTA      |     |         |
| 20 T   | 1              | 6    | 6          | 4457       | 4462 LTA      |     |         |
| 21 TCA | 3              | 4    | 12         | 4493       | 4504 LTA      |     |         |
| 22 A   | 1              | 6    | 6          | 4605       | 4610 NCS      |     |         |
| 23 AT  | 2              | 3    | 6          | 4614       | 4619 NCS      |     |         |
| 24 CA  | 2              | 3    | 6          | 4795       | 4800 STA      |     |         |
| 25 T   | 1              | 7    | 7          | 4836       | 4842 STA      |     |         |
| 26 G   | 1              | 6    | 6          | 4933       | 4938 STA      |     |         |
| 27 T   | 1              | 6    | 6          | 5019       | 5024 STA, LTA |     |         |
| 28 CT  | 2              | 3    | 6          | 5178       | 5183 STA, LTA |     |         |

#### BM45

| S.No     | Consensus Rep. | Size | Iterations | Tract-size | Start         | End | PROTEIN |
|----------|----------------|------|------------|------------|---------------|-----|---------|
| 1 T      | 1              | 6    | 6          | 70         | 75 NCS        |     |         |
| 2 TA     | 2              | 3    | 6          | 112        | 117 NCS       |     |         |
| 3 A      | 1              | 14   | 14         | 119        | 132 NCS       |     |         |
| 4 TC     | 2              | 3    | 6          | 344        | 349 NCS       |     |         |
| 5 C      | 1              | 7    | 7          | 413        | 419 NCS       |     |         |
| 6 AGG    | 3              | 4    | 12         | 574        | 585 NCS       |     |         |
| 7 T      | 1              | 6    | 6          | 591        | 596 NCS       |     |         |
| 8 GC     | 2              | 3    | 6          | 733        | 738 VP2       |     |         |
| 9 CT     | 2              | 3    | 6          | 1004       | 1009 VP2      |     |         |
| 10 GCTAC | 5              | 3    | 16         | 1051       | 1066 VP2      |     |         |
| 11 TA    | 2              | 3    | 6          | 1176       | 1181 VP2      |     |         |
| 12 AT    | 2              | 4    | 8          | 1387       | 1394 VP2      |     |         |
| 13 A     | 1              | 6    | 6          | 1474       | 1479 VP2      |     |         |
| 14 G     | 1              | 6    | 6          | 2127       | 2132 VP1      |     |         |
| 15 ATG   | 3              | 4    | 12         | 2186       | 2197 VP1      |     |         |
| 16 AGATA | 5              | 3    | 15         | 2697       | 2711 VP1      |     |         |
| 17 G     | 1              | 6    | 6          | 2841       | 2846 LTA      |     |         |
| 18 T     | 1              | 7    | 7          | 2939       | 2945 LTA      |     |         |
| 19 T     | 1              | 6    | 6          | 3065       | 3070 LTA      |     |         |
| 20 CA    | 2              | 3    | 6          | 3413       | 3418 LTA      |     |         |
| 21 CTG   | 3              | 3    | 10         | 3728       | 3737 LTA      |     |         |
| 22 A     | 1              | 6    | 6          | 3975       | 3980 LTA      |     |         |
| 23 AT    | 2              | 3    | 6          | 4156       | 4161 LTA      |     |         |
| 24 TCT   | 3              | 4    | 12         | 4361       | 4372 LTA      |     |         |
| 25 T     | 1              | 6    | 6          | 4415       | 4420 LTA      |     |         |
| 26 AGCAA | 5              | 3    | 14         | 4646       | 4659 STA      |     |         |
| 27 T     | 1              | 6    | 6          | 4705       | 4710 STA      |     |         |
| 28 A     | 1              | 6    | 6          | 4721       | 4726 STA      |     |         |
| 29 TA    | 2              | 4    | 8          | 4773       | 4780 STA      |     |         |
| 30 A     | 1              | 7    | 7          | 4782       | 4788 STA      |     |         |
| 31 AG    | 2              | 3    | 6          | 4865       | 4870 STA, LTA |     |         |

**BM46**

| S.No | Consensus Rep. | Size | Iterations | Tract-size | Start | End  | PROTEIN  |
|------|----------------|------|------------|------------|-------|------|----------|
| 1    | CT             | 2    | 3          | 6          | 64    | 69   | NCS      |
| 2    | A              | 1    | 8          | 8          | 125   | 132  | NCS      |
| 3    | A              | 1    | 6          | 6          | 253   | 258  | NCS      |
| 4    | T              | 1    | 7          | 7          | 293   | 299  | NCS      |
| 5    | T              | 1    | 6          | 6          | 550   | 555  | NCS      |
| 6    | A              | 1    | 9          | 9          | 636   | 644  | NCS      |
| 7    | CT             | 2    | 3          | 6          | 828   | 833  | VP2      |
| 8    | TC             | 2    | 3          | 6          | 1549  | 1554 | VP2      |
| 9    | AGA            | 3    | 5          | 15         | 1583  | 1597 | VP2, VP1 |
| 10   | A              | 1    | 8          | 8          | 1605  | 1612 | VP2, VP1 |
| 11   | AG             | 2    | 3          | 6          | 1828  | 1833 | VP1      |
| 12   | G              | 1    | 6          | 6          | 2049  | 2054 | VP1      |
| 13   | TG             | 2    | 3          | 6          | 2077  | 2082 | VP1      |
| 14   | TC             | 2    | 3          | 6          | 2268  | 2273 | VP1      |
| 15   | CAC            | 3    | 4          | 12         | 2301  | 2312 | VP1      |
| 16   | TCT            | 3    | 3          | 9          | 2875  | 2883 | LTA      |
| 17   | T              | 1    | 7          | 7          | 3014  | 3020 | LTA      |
| 18   | TC             | 2    | 3          | 6          | 3196  | 3201 | LTA      |
| 19   | CA             | 2    | 3          | 6          | 3359  | 3364 | LTA      |
| 20   | T              | 1    | 7          | 7          | 3581  | 3587 | LTA      |
| 21   | T              | 1    | 6          | 6          | 3692  | 3697 | LTA      |
| 22   | T              | 1    | 7          | 7          | 3895  | 3901 | LTA      |
| 23   | A              | 1    | 6          | 6          | 3921  | 3926 | LTA      |
| 24   | CT             | 2    | 3          | 6          | 3927  | 3932 | LTA      |
| 25   | ATT            | 3    | 4          | 12         | 4116  | 4127 | LTA      |
| 26   | AGA            | 3    | 3          | 9          | 4189  | 4197 | LTA      |
| 27   | T              | 1    | 6          | 6          | 4315  | 4320 | LTA      |
| 28   | TCT            | 3    | 4          | 14         | 4348  | 4361 | LTA      |
| 29   | T              | 1    | 6          | 6          | 4367  | 4372 | LTA      |
| 30   | TTC            | 3    | 9          | 27         | 4407  | 4433 | LTA      |
| 31   | AT             | 2    | 3          | 6          | 4638  | 4643 | STA      |
| 32   | CA             | 2    | 3          | 6          | 4670  | 4675 | STA      |
| 33   | TC             | 2    | 3          | 6          | 4696  | 4701 | STA      |
| 34   | TC             | 2    | 3          | 6          | 4769  | 4774 | STA      |
| 35   | T              | 1    | 6          | 6          | 4864  | 4869 | STA, LTA |
| 36   | T              | 1    | 6          | 6          | 4927  | 4932 | STA, LTA |
| 37   | CT             | 2    | 3          | 6          | 5023  | 5028 | STA, LTA |

**BM47**

| S.No | Consensus Rep. | Size | Iterations | Tract-size | Start | End  | PROTEIN       |
|------|----------------|------|------------|------------|-------|------|---------------|
| 1    | GA             | 2    | 3          | 6          | 53    | 58   | NCS           |
| 2    | A              | 1    | 8          | 8          | 98    | 105  | NCS           |
| 3    | C              | 1    | 6          | 6          | 392   | 397  | NCS           |
| 4    | GAG            | 3    | 5          | 15         | 429   | 443  | NCS           |
| 5    | GCC            | 3    | 4          | 12         | 679   | 690  | VP2           |
| 6    | AG             | 2    | 3          | 6          | 1069  | 1074 | VP2, VP3      |
| 7    | T              | 1    | 6          | 6          | 1162  | 1167 | VP2, VP3      |
| 8    | AT             | 2    | 4          | 8          | 1205  | 1212 | VP2, VP3      |
| 9    | AG             | 2    | 3          | 6          | 1234  | 1239 | VP2, VP3      |
| 10   | AG             | 2    | 3          | 6          | 1278  | 1283 | VP2, VP3      |
| 11   | AGA            | 3    | 4          | 12         | 1329  | 1340 | VP2, VP3      |
| 12   | AGA            | 3    | 7          | 21         | 1485  | 1505 | VP2, VP3, VP1 |
| 13   | A              | 1    | 6          | 6          | 1519  | 1524 | VP2, VP3, VP1 |
| 14   | GA             | 2    | 3          | 6          | 1719  | 1724 | VP1           |
| 15   | TGA            | 3    | 3          | 10         | 1770  | 1779 | VP1           |
| 16   | ATG            | 3    | 4          | 12         | 1881  | 1892 | VP1           |
| 17   | TA             | 2    | 3          | 6          | 2607  | 2612 | NCS           |
| 18   | AGG            | 3    | 4          | 11         | 2694  | 2704 | LTA           |
| 19   | G              | 1    | 6          | 6          | 2703  | 2708 | LTA           |
| 20   | T              | 1    | 6          | 6          | 3066  | 3071 | LTA           |
| 21   | TC             | 2    | 3          | 6          | 3106  | 3111 | LTA           |
| 22   | GCA            | 3    | 3          | 9          | 3289  | 3297 | LTA           |
| 23   | TC             | 2    | 3          | 6          | 3510  | 3515 | LTA           |
| 24   | T              | 1    | 6          | 6          | 3678  | 3683 | LTA           |
| 25   | TCA            | 3    | 5          | 14         | 3811  | 3824 | LTA           |
| 26   | TC             | 2    | 3          | 6          | 3916  | 3921 | LTA           |
| 27   | A              | 1    | 8          | 8          | 4009  | 4016 | LTA           |
| 28   | A              | 1    | 6          | 6          | 4056  | 4061 | LTA           |
| 29   | TA             | 2    | 3          | 6          | 4088  | 4093 | LTA           |
| 30   | G              | 1    | 6          | 6          | 4230  | 4235 | LTA           |
| 31   | AG             | 2    | 3          | 6          | 4383  | 4388 | NCS           |
| 32   | AC             | 2    | 3          | 6          | 4396  | 4401 | NCS           |

|        |   |   |    |      |          |
|--------|---|---|----|------|----------|
| 33 AAT | 3 | 4 | 12 | 4403 | 4414 NCS |
| 34 TC  | 2 | 3 | 6  | 4571 | 4576 STA |
| 35 T   | 1 | 6 | 6  | 4584 | 4589 STA |

#### BM48

| S.No    | Consensus Rep. | Size | Iterations | Tract-size | Start         | End | PROTEIN |
|---------|----------------|------|------------|------------|---------------|-----|---------|
| 1 GA    | 2              | 3    | 6          | 84         | 89 NCS        |     |         |
| 2 TAT   | 3              | 3    | 10         | 121        | 130 NCS       |     |         |
| 3 A     | 1              | 9    | 9          | 131        | 139 NCS       |     |         |
| 4 A     | 1              | 8    | 8          | 450        | 457 AgP       |     |         |
| 5 T     | 1              | 9    | 9          | 601        | 609 NCS       |     |         |
| 6 GCT   | 3              | 4    | 12         | 675        | 686 VP2       |     |         |
| 7 GCT   | 3              | 4    | 12         | 723        | 734 VP2       |     |         |
| 8 T     | 1              | 6    | 6          | 1185       | 1190 VP2, VP3 |     |         |
| 9 A     | 1              | 6    | 6          | 1453       | 1458 VP2, VP3 |     |         |
| 10 AG   | 2              | 3    | 6          | 1806       | 1811 VP1      |     |         |
| 11 AG   | 2              | 3    | 6          | 2507       | 2512 VP1      |     |         |
| 12 AT   | 2              | 3    | 6          | 2610       | 2615 VP1      |     |         |
| 13 AT   | 2              | 6    | 11         | 2946       | 2956 LTA      |     |         |
| 14 T    | 1              | 6    | 6          | 3105       | 3110 LTA      |     |         |
| 15 AT   | 2              | 3    | 6          | 3148       | 3153 LTA      |     |         |
| 16 TC   | 2              | 3    | 6          | 3308       | 3313 LTA      |     |         |
| 17 CA   | 2              | 3    | 6          | 3474       | 3479 LTA      |     |         |
| 18 A    | 1              | 6    | 6          | 3578       | 3583 LTA      |     |         |
| 19 AT   | 2              | 3    | 6          | 3641       | 3646 LTA      |     |         |
| 20 T    | 1              | 7    | 7          | 3759       | 3765 LTA      |     |         |
| 21 CTG  | 3              | 3    | 10         | 3783       | 3792 LTA      |     |         |
| 22 T    | 1              | 6    | 6          | 3801       | 3806 LTA      |     |         |
| 23 T    | 1              | 6    | 6          | 3880       | 3885 LTA      |     |         |
| 24 TAA  | 3              | 4    | 12         | 3937       | 3948 LTA      |     |         |
| 25 TA   | 2              | 3    | 6          | 4104       | 4109 LTA      |     |         |
| 26 A    | 1              | 6    | 6          | 4142       | 4147 LTA      |     |         |
| 27 AATT | 4              | 3    | 11         | 4173       | 4183 LTA      |     |         |
| 28 CA   | 2              | 3    | 6          | 4236       | 4241 LTA      |     |         |
| 29 T    | 1              | 6    | 6          | 4282       | 4287 LTA      |     |         |
| 30 T    | 1              | 10   | 10         | 4416       | 4425 LTA      |     |         |
| 31 A    | 1              | 8    | 8          | 4571       | 4578 NCS      |     |         |
| 32 TG   | 2              | 3    | 6          | 4723       | 4728 STA      |     |         |
| 33 T    | 1              | 7    | 7          | 4970       | 4976 STA, LTA |     |         |

#### BM49

| S.No   | Consensus Rep. | Size | Iterations | Tract-size | Start   | End | PROTEIN |
|--------|----------------|------|------------|------------|---------|-----|---------|
| 1 TA   | 2              | 4    | 8          | 15         | 22 NCS  |     |         |
| 2 A    | 1              | 8    | 8          | 22         | 29 NCS  |     |         |
| 3 TA   | 2              | 4    | 8          | 113        | 120 NCS |     |         |
| 4 A    | 1              | 8    | 8          | 120        | 127 NCS |     |         |
| 5 A    | 1              | 7    | 7          | 340        | 346 HP  |     |         |
| 6 T    | 1              | 7    | 7          | 365        | 371 HP  |     |         |
| 7 A    | 1              | 7    | 7          | 421        | 427 HP  |     |         |
| 8 T    | 1              | 9    | 9          | 503        | 511 NCS |     |         |
| 9 GCT  | 3              | 4    | 12         | 577        | 588 HP  |     |         |
| 10 GCT | 3              | 4    | 12         | 625        | 636 HP  |     |         |
| 11 T   | 1              | 6    | 6          | 826        | 831 HP  |     |         |
| 12 TA  | 2              | 3    | 6          | 1157       | 1162 HP |     |         |
| 13 GAG | 3              | 4    | 12         | 1533       | 1544 HP |     |         |
| 14 T   | 1              | 8    | 8          | 1897       | 1904 HP |     |         |
| 15 G   | 1              | 7    | 7          | 1910       | 1916 HP |     |         |
| 16 T   | 1              | 6    | 6          | 2627       | 2632 HP |     |         |
| 17 TG  | 2              | 3    | 6          | 2676       | 2681 HP |     |         |
| 18 CT  | 2              | 3    | 6          | 2774       | 2779 HP |     |         |
| 19 T   | 1              | 6    | 6          | 2968       | 2973 HP |     |         |
| 20 TC  | 2              | 3    | 6          | 3134       | 3139 HP |     |         |
| 21 T   | 1              | 8    | 8          | 3409       | 3416 HP |     |         |
| 22 AT  | 2              | 3    | 6          | 3504       | 3509 HP |     |         |
| 23 T   | 1              | 6    | 6          | 3664       | 3669 HP |     |         |
| 24 T   | 1              | 7    | 7          | 3744       | 3750 HP |     |         |
| 25 T   | 1              | 6    | 6          | 3755       | 3760 HP |     |         |
| 26 A   | 1              | 7    | 7          | 3807       | 3813 HP |     |         |
| 27 C   | 1              | 6    | 6          | 3915       | 3920 HP |     |         |
| 28 A   | 1              | 6    | 6          | 4005       | 4010 HP |     |         |
| 29 TA  | 2              | 3    | 6          | 4150       | 4155 HP |     |         |
| 30 T   | 1              | 8    | 8          | 4275       | 4282 HP |     |         |
| 31 TCA | 3              | 3    | 9          | 4320       | 4328 HP |     |         |

|       |   |   |   |      |          |
|-------|---|---|---|------|----------|
| 32 A  | 1 | 9 | 9 | 4429 | 4437 NCS |
| 33 A  | 1 | 6 | 6 | 4454 | 4459 NCS |
| 34 CA | 2 | 3 | 6 | 4616 | 4621 HP  |
| 35 T  | 1 | 7 | 7 | 4830 | 4836 HP  |
| 36 A  | 1 | 6 | 6 | 4841 | 4846 HP  |
| 37 T  | 1 | 6 | 6 | 4903 | 4908 HP  |
| 38 A  | 1 | 6 | 6 | 5030 | 5035 HP  |
| 39 A  | 1 | 6 | 6 | 5043 | 5048 HP  |

#### BM50

| S.No    | Consensus Rep. | Size | Iterations | Tract-size | Start | End  | PROTEIN           |
|---------|----------------|------|------------|------------|-------|------|-------------------|
| 1 A     | 1              | 7    | 7          | 7          | 23    | 29   | NCS               |
| 2 TG    | 2              | 3    | 6          | 6          | 63    | 68   | NCS               |
| 3 GT    | 2              | 3    | 6          | 6          | 78    | 83   | NCS               |
| 4 CA    | 2              | 3    | 6          | 6          | 155   | 160  | NCS               |
| 5 T     | 1              | 6    | 6          | 6          | 226   | 231  | NCS               |
| 6 AC    | 2              | 3    | 6          | 6          | 236   | 241  | NCS               |
| 7 CAG   | 3              | 4    | 12         | 12         | 1255  | 1266 | VP2/VP3, VP3      |
| 8 TA    | 2              | 3    | 6          | 6          | 1295  | 1300 | VP2/VP3, VP3      |
| 9 A     | 1              | 6    | 6          | 6          | 1523  | 1528 | VP2/VP3, VP3, VP1 |
| 10 A    | 1              | 7    | 7          | 7          | 1584  | 1590 | VP2/VP3, VP3, VP1 |
| 11 TTG  | 3              | 3    | 10         | 10         | 1900  | 1909 | VP1               |
| 12 GA   | 2              | 3    | 6          | 6          | 2131  | 2136 | VP1               |
| 13 T    | 1              | 6    | 6          | 6          | 2371  | 2376 | VP1               |
| 14 C    | 1              | 6    | 6          | 6          | 2521  | 2526 | VP1               |
| 15 T    | 1              | 6    | 6          | 6          | 2680  | 2685 | LTA               |
| 16 TA   | 2              | 3    | 6          | 6          | 2730  | 2735 | LTA               |
| 17 T    | 1              | 6    | 6          | 6          | 2873  | 2878 | LTA               |
| 18 T    | 1              | 6    | 6          | 6          | 2921  | 2926 | LTA               |
| 19 T    | 1              | 8    | 8          | 8          | 3015  | 3022 | LTA               |
| 20 AT   | 2              | 3    | 6          | 6          | 3145  | 3150 | LTA               |
| 21 CA   | 2              | 3    | 6          | 6          | 3221  | 3226 | LTA               |
| 22 CTAA | 4              | 3    | 11         | 11         | 3331  | 3341 | LTA               |
| 23 T    | 1              | 7    | 7          | 7          | 3350  | 3356 | LTA               |
| 24 CAA  | 3              | 3    | 9          | 9          | 3413  | 3421 | LTA               |
| 25 TG   | 2              | 3    | 6          | 6          | 3529  | 3534 | LTA               |
| 26 T    | 1              | 7    | 7          | 7          | 3541  | 3547 | LTA               |
| 27 CAT  | 3              | 3    | 9          | 9          | 3614  | 3622 | LTA               |
| 28 TA   | 2              | 3    | 6          | 6          | 3666  | 3671 | LTA               |
| 29 CA   | 2              | 3    | 6          | 6          | 3821  | 3826 | LTA               |
| 30 T    | 1              | 6    | 6          | 6          | 4167  | 4172 | LTA               |
| 31 GTAT | 4              | 3    | 12         | 12         | 4317  | 4328 | LTA               |
| 32 A    | 1              | 9    | 9          | 9          | 4476  | 4484 | STA               |
| 33 CA   | 2              | 3    | 6          | 6          | 4522  | 4527 | STA               |
| 34 AT   | 2              | 3    | 6          | 6          | 4639  | 4644 | STA               |
| 35 AT   | 2              | 3    | 6          | 6          | 4662  | 4667 | STA               |
| 36 TCT  | 3              | 4    | 12         | 12         | 4738  | 4749 | STA, LTA          |
| 37 CT   | 2              | 3    | 6          | 6          | 4973  | 4978 | NCS               |
| 38 T    | 1              | 6    | 6          | 6          | 5033  | 5038 | NCS               |

#### BM51

| S.No    | Consensus Rep. | Size | Iterations | Tract-size | Start | End  | PROTEIN      |
|---------|----------------|------|------------|------------|-------|------|--------------|
| 1 A     | 1              | 8    | 8          | 8          | 24    | 31   | NCS          |
| 2 TA    | 2              | 4    | 8          | 8          | 843   | 850  | VP2/VP3      |
| 3 C     | 1              | 6    | 6          | 6          | 922   | 927  | VP2/VP3      |
| 4 TCCA  | 4              | 3    | 13         | 13         | 962   | 974  | VP2/VP3      |
| 5 AAG   | 3              | 3    | 10         | 10         | 1292  | 1301 | VP2/VP3, VP3 |
| 6 T     | 1              | 6    | 6          | 6          | 2519  | 2524 | VP1          |
| 7 AC    | 2              | 3    | 6          | 6          | 2766  | 2771 | VP1          |
| 8 TA    | 2              | 3    | 6          | 6          | 2887  | 2892 | LTA          |
| 9 T     | 1              | 8    | 8          | 8          | 3172  | 3179 | LTA          |
| 10 AGC  | 3              | 4    | 12         | 12         | 3394  | 3405 | LTA          |
| 11 T    | 1              | 7    | 7          | 7          | 3450  | 3456 | LTA          |
| 12 T    | 1              | 6    | 6          | 6          | 3600  | 3605 | LTA          |
| 13 AC   | 2              | 3    | 6          | 6          | 3691  | 3696 | LTA          |
| 14 T    | 1              | 7    | 7          | 7          | 3698  | 3704 | LTA          |
| 15 T    | 1              | 7    | 7          | 7          | 3734  | 3740 | LTA          |
| 16 AAGT | 4              | 3    | 11         | 11         | 3835  | 3845 | LTA          |
| 17 TA   | 2              | 3    | 6          | 6          | 4008  | 4013 | LTA          |
| 18 T    | 1              | 6    | 6          | 6          | 4186  | 4191 | LTA          |
| 19 T    | 1              | 11   | 11         | 11         | 4325  | 4335 | LTA          |
| 20 TTC  | 3              | 3    | 9          | 9          | 4438  | 4446 | LTA          |
| 21 A    | 1              | 9    | 9          | 9          | 4514  | 4522 | NCS          |

|        |   |   |    |      |               |
|--------|---|---|----|------|---------------|
| 22 A   | 1 | 7 | 7  | 4629 | 4635 STA      |
| 23 CT  | 2 | 3 | 6  | 4666 | 4671 STA      |
| 24 TCT | 3 | 4 | 12 | 4928 | 4939 STA, LTA |
| 25 AC  | 2 | 3 | 6  | 4961 | 4966 STA, LTA |
| 26 T   | 1 | 6 | 6  | 5004 | 5009 STA, LTA |

### BM52

| S.No   | Consensus Rep. | Size | Iterations | Tract-size | Start | End  | PROTEIN       |
|--------|----------------|------|------------|------------|-------|------|---------------|
| 1 CTG  |                | 3    | 4          | 12         | 31    | 42   | NCS           |
| 2 A    |                | 1    | 7          | 7          | 72    | 78   | NCS           |
| 3 TA   |                | 2    | 3          | 6          | 92    | 97   | NCS           |
| 4 A    |                | 1    | 6          | 6          | 99    | 104  | NCS           |
| 5 T    |                | 1    | 6          | 6          | 365   | 370  | NCS           |
| 6 GCA  |                | 3    | 3          | 9          | 469   | 477  | VP2           |
| 7 AG   |                | 2    | 3          | 6          | 549   | 554  | VP2           |
| 8 CT   |                | 2    | 3          | 6          | 624   | 629  | VP2           |
| 9 T    |                | 1    | 6          | 6          | 964   | 969  | VP2, VP3      |
| 10 A   |                | 1    | 6          | 6          | 1320  | 1325 | VP2, VP3, VP1 |
| 11 GC  |                | 2    | 3          | 6          | 1335  | 1340 | VP2, VP3, VP1 |
| 12 TGC |                | 3    | 5          | 15         | 1705  | 1719 | VP1           |
| 13 C   |                | 1    | 6          | 6          | 2498  | 2503 | VP1           |
| 14 T   |                | 1    | 6          | 6          | 2813  | 2818 | NCS           |
| 15 A   |                | 1    | 6          | 6          | 2858  | 2863 | NCS           |
| 16 TCC |                | 3    | 4          | 12         | 2976  | 2987 | LTA           |
| 17 T   |                | 1    | 6          | 6          | 3228  | 3233 | LTA           |
| 18 G   |                | 1    | 6          | 6          | 3309  | 3314 | LTA           |
| 19 CA  |                | 2    | 3          | 6          | 3362  | 3367 | LTA           |
| 20 T   |                | 1    | 7          | 7          | 3622  | 3628 | LTA           |
| 21 AT  |                | 2    | 3          | 6          | 3719  | 3724 | LTA           |
| 22 T   |                | 1    | 7          | 7          | 3876  | 3882 | LTA           |
| 23 TAA |                | 3    | 4          | 12         | 4016  | 4027 | LTA           |
| 24 TCA |                | 3    | 4          | 12         | 4092  | 4103 | LTA           |
| 25 T   |                | 1    | 6          | 6          | 4132  | 4137 | LTA           |
| 26 CA  |                | 2    | 3          | 6          | 4150  | 4155 | LTA           |
| 27 CAA |                | 3    | 3          | 10         | 4194  | 4203 | LTA           |
| 28 TA  |                | 2    | 3          | 6          | 4345  | 4350 | LTA           |
| 29 T   |                | 1    | 6          | 6          | 4360  | 4365 | LTA           |
| 30 TCT |                | 3    | 4          | 11         | 4462  | 4472 | LTA, ALTO     |
| 31 CT  |                | 2    | 3          | 6          | 4482  | 4487 | LTA, ALTO     |
| 32 TG  |                | 2    | 3          | 6          | 4488  | 4493 | LTA, ALTO     |
| 33 TA  |                | 2    | 3          | 6          | 5009  | 5014 | STA, LTA      |
| 34 T   |                | 1    | 7          | 7          | 5075  | 5081 | STA, LTA      |

### BM53

| S.No    | Consensus Rep. | Size | Iterations | Tract-size | Start | End  | PROTEIN  |
|---------|----------------|------|------------|------------|-------|------|----------|
| 1 A     |                | 1    | 6          | 6          | 90    | 95   | NCS      |
| 2 T     |                | 1    | 7          | 7          | 264   | 270  | NCS      |
| 3 T     |                | 1    | 6          | 6          | 287   | 292  | NCS      |
| 4 TG    |                | 2    | 3          | 6          | 319   | 324  | NCS      |
| 5 AT    |                | 2    | 3          | 6          | 467   | 472  | NCS      |
| 6 AT    |                | 2    | 3          | 6          | 1030  | 1035 | VP2, VP3 |
| 7 T     |                | 1    | 8          | 8          | 1084  | 1091 | VP2, VP3 |
| 8 AC    |                | 2    | 3          | 6          | 1726  | 1731 | VP1      |
| 9 T     |                | 1    | 7          | 7          | 1943  | 1949 | VP1      |
| 10 TC   |                | 2    | 3          | 6          | 2198  | 2203 | VP1      |
| 11 ACA  |                | 3    | 5          | 14         | 2212  | 2225 | VP1      |
| 12 T    |                | 1    | 6          | 6          | 2352  | 2357 | VP1      |
| 13 TCTT |                | 4    | 4          | 15         | 2790  | 2804 | NCS      |
| 14 TA   |                | 2    | 3          | 6          | 3011  | 3016 | NCS      |
| 15 T    |                | 1    | 7          | 7          | 3017  | 3023 | NCS      |
| 16 T    |                | 1    | 8          | 8          | 3072  | 3079 | NCS      |
| 17 T    |                | 1    | 9          | 9          | 3126  | 3134 | NCS      |
| 18 AT   |                | 2    | 3          | 6          | 3680  | 3685 | LTA      |
| 19 T    |                | 1    | 8          | 8          | 3887  | 3894 | LTA      |
| 20 C    |                | 1    | 6          | 6          | 4088  | 4093 | LTA      |
| 21 A    |                | 1    | 6          | 6          | 4229  | 4234 | LTA      |
| 22 CA   |                | 2    | 3          | 6          | 4255  | 4260 | LTA      |
| 23 TA   |                | 2    | 3          | 6          | 4261  | 4266 | LTA      |
| 24 TG   |                | 2    | 3          | 6          | 4407  | 4412 | LTA      |
| 25 TC   |                | 2    | 3          | 6          | 4662  | 4667 | LTA      |
| 26 C    |                | 1    | 6          | 6          | 4671  | 4676 | LTA      |
| 27 A    |                | 1    | 6          | 6          | 4731  | 4736 | LTA      |
| 28 G    |                | 1    | 6          | 6          | 4744  | 4749 | LTA      |

|       |   |   |   |      |               |
|-------|---|---|---|------|---------------|
| 29 CA | 2 | 3 | 6 | 4772 | 4777 LTA      |
| 30 T  | 1 | 7 | 7 | 4817 | 4823 LTA      |
| 31 T  | 1 | 7 | 7 | 5029 | 5035 LTA      |
| 32 T  | 1 | 9 | 9 | 5612 | 5620 STA, LTA |

#### BM54

| S.No    | Consensus Rep. | Size | Iterations | Tract-size | Start             | End | PROTEIN |
|---------|----------------|------|------------|------------|-------------------|-----|---------|
| 1 A     | 1              | 8    | 8          | 21         | 28 NCS            |     |         |
| 2 AC    | 2              | 3    | 6          | 258        | 263 NCS           |     |         |
| 3 A     | 1              | 7    | 7          | 398        | 404 AgnoP         |     |         |
| 4 A     | 1              | 6    | 6          | 485        | 490 AgnoP         |     |         |
| 5 GCT   | 3              | 5    | 15         | 613        | 627 VP2           |     |         |
| 6 GCT   | 3              | 4    | 12         | 778        | 789 VP2           |     |         |
| 7 T     | 1              | 6    | 6          | 859        | 864 VP2           |     |         |
| 8 GAA   | 3              | 3    | 10         | 1102       | 1111 VP2, HP      |     |         |
| 9 TAC   | 3              | 4    | 11         | 1210       | 1220 VP2, HP      |     |         |
| 10 A    | 1              | 6    | 6          | 1550       | 1555 VP1, VP2, HP |     |         |
| 11 A    | 1              | 6    | 6          | 1905       | 1910 VP1          |     |         |
| 12 T    | 1              | 7    | 7          | 1957       | 1963 VP1          |     |         |
| 13 GT   | 2              | 3    | 6          | 1995       | 2000 VP1          |     |         |
| 14 A    | 1              | 6    | 6          | 2044       | 2049 VP1          |     |         |
| 15 CAG  | 3              | 3    | 10         | 2062       | 2071 VP1          |     |         |
| 16 A    | 1              | 7    | 7          | 2593       | 2599 NCS          |     |         |
| 17 AAC  | 3              | 4    | 12         | 2669       | 2680 NCS          |     |         |
| 18 T    | 1              | 6    | 6          | 2724       | 2729 LTA          |     |         |
| 19 TCA  | 3              | 6    | 18         | 2905       | 2922 LTA          |     |         |
| 20 T    | 1              | 6    | 6          | 2975       | 2980 LTA          |     |         |
| 21 TC   | 2              | 3    | 6          | 3012       | 3017 LTA          |     |         |
| 22 C    | 1              | 6    | 6          | 3483       | 3488 LTA          |     |         |
| 23 T    | 1              | 7    | 7          | 3560       | 3566 LTA          |     |         |
| 24 TCCA | 4              | 3    | 12         | 3648       | 3659 LTA          |     |         |
| 25 T    | 1              | 6    | 6          | 3815       | 3820 LTA          |     |         |
| 26 T    | 1              | 6    | 6          | 3894       | 3899 LTA          |     |         |
| 27 TG   | 2              | 3    | 6          | 4214       | 4219 LTA          |     |         |
| 28 A    | 1              | 6    | 6          | 4227       | 4232 LTA          |     |         |
| 29 GCAA | 4              | 3    | 13         | 4339       | 4351 LTA          |     |         |
| 30 A    | 1              | 6    | 6          | 4381       | 4386 LTA          |     |         |
| 31 T    | 1              | 6    | 6          | 4435       | 4440 LTA          |     |         |
| 32 TCA  | 3              | 3    | 9          | 4474       | 4482 LTA          |     |         |
| 33 CA   | 2              | 3    | 6          | 4760       | 4765 STA          |     |         |
| 34 AAG  | 3              | 3    | 10         | 4901       | 4910 STA          |     |         |
| 35 T    | 1              | 6    | 6          | 5010       | 5015 STA          |     |         |
| 36 T    | 1              | 7    | 7          | 5053       | 5059 STA          |     |         |
| 37 CT   | 2              | 3    | 6          | 5140       | 5145 STA          |     |         |
| 38 A    | 1              | 6    | 6          | 5198       | 5203 HP           |     |         |

#### BM55

| S.No    | Consensus Rep. | Size | Iterations | Tract-size | Start         | End | PROTEIN |
|---------|----------------|------|------------|------------|---------------|-----|---------|
| 1 T     | 1              | 6    | 6          | 10         | 15 NCS        |     |         |
| 2 CT    | 2              | 4    | 8          | 56         | 63 NCS        |     |         |
| 3 A     | 1              | 10   | 10         | 113        | 122 NCS, AgP  |     |         |
| 4 CT    | 2              | 3    | 6          | 685        | 690 VP2       |     |         |
| 5 AGC   | 3              | 3    | 9          | 927        | 935 VP2       |     |         |
| 6 CA    | 2              | 3    | 6          | 1191       | 1196 VP2, VP3 |     |         |
| 7 A     | 1              | 6    | 6          | 2185       | 2190 VP1      |     |         |
| 8 TG    | 2              | 3    | 6          | 2679       | 2684 LTA      |     |         |
| 9 T     | 1              | 8    | 8          | 2899       | 2906 LTA      |     |         |
| 10 T    | 1              | 7    | 7          | 2944       | 2950 LTA      |     |         |
| 11 T    | 1              | 7    | 7          | 3025       | 3031 LTA      |     |         |
| 12 GCT  | 3              | 3    | 9          | 3264       | 3272 LTA      |     |         |
| 13 T    | 1              | 6    | 6          | 3580       | 3585 LTA      |     |         |
| 14 CA   | 2              | 3    | 6          | 3736       | 3741 LTA      |     |         |
| 15 T    | 1              | 6    | 6          | 3783       | 3788 LTA      |     |         |
| 16 A    | 1              | 6    | 6          | 3806       | 3811 LTA      |     |         |
| 17 CA   | 2              | 4    | 8          | 3863       | 3870 LTA      |     |         |
| 18 T    | 1              | 6    | 6          | 4055       | 4060 LTA      |     |         |
| 19 T    | 1              | 6    | 6          | 4075       | 4080 LTA      |     |         |
| 20 TA   | 2              | 3    | 6          | 4090       | 4095 LTA      |     |         |
| 21 CTTA | 4              | 3    | 11         | 4115       | 4125 LTA      |     |         |
| 22 CTT  | 3              | 4    | 12         | 4187       | 4198 LTA      |     |         |
| 23 TTC  | 3              | 4    | 12         | 4226       | 4237 LTA      |     |         |
| 24 A    | 1              | 6    | 6          | 4384       | 4389 NCS      |     |         |
| 25 TA   | 2              | 3    | 6          | 4492       | 4497 STA      |     |         |

|       |   |   |   |      |               |
|-------|---|---|---|------|---------------|
| 26 CA | 2 | 3 | 6 | 4654 | 4659 STA      |
| 27 TC | 2 | 3 | 6 | 4678 | 4683 STA, LTA |

#### BM56

| S.No      | Consensus Rep. | Size | Iterations | Tract-size | Start         | End | PROTEIN |
|-----------|----------------|------|------------|------------|---------------|-----|---------|
| 1 A       | 1              | 7    | 7          | 70         | 76 NCS        |     |         |
| 2 TA      | 2              | 3    | 6          | 90         | 95 NCS        |     |         |
| 3 A       | 1              | 9    | 9          | 95         | 103 NCS       |     |         |
| 4 T       | 1              | 7    | 7          | 322        | 328 NCS       |     |         |
| 5 AC      | 2              | 3    | 6          | 666        | 671 VP2       |     |         |
| 6 AG      | 2              | 3    | 6          | 1256       | 1261 VP2, VP3 |     |         |
| 7 G       | 1              | 8    | 8          | 1722       | 1729 VP1      |     |         |
| 8 A       | 1              | 6    | 6          | 2414       | 2419 VP1      |     |         |
| 9 AAGG    | 4              | 3    | 13         | 2466       | 2478 VP1      |     |         |
| 10 ACCCCC | 6              | 3    | 18         | 2602       | 2619 VP1      |     |         |
| 11 GT     | 2              | 3    | 6          | 2841       | 2846 LTA      |     |         |
| 12 T      | 1              | 6    | 6          | 3195       | 3200 LTA      |     |         |
| 13 AT     | 2              | 3    | 6          | 3278       | 3283 LTA      |     |         |
| 14 AT     | 2              | 3    | 6          | 3861       | 3866 LTA      |     |         |
| 15 CT     | 2              | 3    | 6          | 3883       | 3888 LTA      |     |         |
| 16 T      | 1              | 6    | 6          | 4122       | 4127 LTA      |     |         |
| 17 T      | 1              | 6    | 6          | 4350       | 4355 LTA      |     |         |
| 18 TCT    | 3              | 4    | 11         | 4458       | 4468 LTA      |     |         |
| 19 TC     | 2              | 3    | 6          | 4567       | 4572 LTA      |     |         |
| 20 G      | 1              | 6    | 6          | 4591       | 4596 LTA      |     |         |
| 21 AT     | 2              | 3    | 6          | 4622       | 4627 NCS      |     |         |
| 22 A      | 1              | 6    | 6          | 5084       | 5089 LTA, STA |     |         |

#### BM57

| S.No   | Consensus Rep. | Size | Iterations | Tract-size | Start              | End | PROTEIN |
|--------|----------------|------|------------|------------|--------------------|-----|---------|
| 1 CG   | 2              | 3    | 6          | 37         | 42 NCS             |     |         |
| 2 AC   | 2              | 3    | 6          | 369        | 374 VP2            |     |         |
| 3 GA   | 2              | 4    | 8          | 648        | 655 VP2, VP3       |     |         |
| 4 AAT  | 3              | 3    | 10         | 956        | 965 VP2, VP3       |     |         |
| 5 A    | 1              | 7    | 7          | 1146       | 1152 VP2, VP3, VP1 |     |         |
| 6 TGG  | 3              | 4    | 11         | 1467       | 1477 VP1           |     |         |
| 7 AG   | 2              | 3    | 6          | 1543       | 1548 VP1           |     |         |
| 8 CAGG | 4              | 3    | 12         | 1580       | 1591 VP1           |     |         |
| 9 GA   | 2              | 3    | 6          | 1614       | 1619 VP1           |     |         |
| 10 C   | 1              | 6    | 6          | 2120       | 2125 VP1           |     |         |
| 11 TTA | 3              | 3    | 9          | 2414       | 2422 LTA           |     |         |
| 12 TC  | 2              | 3    | 6          | 2614       | 2619 LTA           |     |         |
| 13 TGC | 3              | 3    | 9          | 2796       | 2804 LTA           |     |         |
| 14 AT  | 2              | 3    | 6          | 2947       | 2952 LTA           |     |         |
| 15 TC  | 2              | 3    | 6          | 2962       | 2967 LTA           |     |         |
| 16 AC  | 2              | 3    | 6          | 3196       | 3201 LTA           |     |         |
| 17 GT  | 2              | 3    | 6          | 3465       | 3470 LTA           |     |         |
| 18 TC  | 2              | 3    | 6          | 3922       | 3927 LTA           |     |         |
| 19 A   | 1              | 8    | 8          | 4007       | 4014 STA           |     |         |
| 20 A   | 1              | 8    | 8          | 4016       | 4023 STA           |     |         |
| 21 CA  | 2              | 3    | 6          | 4043       | 4048 STA           |     |         |
| 22 T   | 1              | 6    | 6          | 4621       | 4626 STA, LTA      |     |         |
| 23 A   | 1              | 7    | 7          | 4674       | 4680 STA, LTA      |     |         |
| 24 T   | 1              | 10   | 10         | 4707       | 4716 STA, LTA      |     |         |
| 25 AC  | 2              | 3    | 6          | 4890       | 4895 STA, LTA      |     |         |

#### BM58

| S.No      | Consensus Rep. | Size | Iterations | Tract-size | Start              | End | PROTEIN |
|-----------|----------------|------|------------|------------|--------------------|-----|---------|
| 1 T       | 1              | 6    | 6          | 9          | 14 NCS             |     |         |
| 2 CT      | 2              | 3    | 6          | 99         | 104 NCS            |     |         |
| 3 A       | 1              | 9    | 9          | 116        | 124 NCS            |     |         |
| 4 AT      | 2              | 3    | 6          | 203        | 208 NCS            |     |         |
| 5 TG      | 2              | 3    | 6          | 328        | 333 NCS            |     |         |
| 6 CCTC    | 4              | 3    | 12         | 683        | 694 NCS            |     |         |
| 7 GA      | 2              | 3    | 6          | 751        | 756 NCS            |     |         |
| 8 GACAA   | 5              | 3    | 15         | 1324       | 1338 VP2, VP3      |     |         |
| 9 T       | 1              | 6    | 6          | 1405       | 1410 VP2, VP3      |     |         |
| 10 GGA    | 3              | 6    | 21         | 1719       | 1739 VP2, VP3, VP1 |     |         |
| 11 A      | 1              | 7    | 7          | 1748       | 1754 VP2, VP3, VP1 |     |         |
| 12 CCGCTC | 6              | 3    | 18         | 1770       | 1787 VP2, VP3, VP1 |     |         |
| 13 A      | 1              | 6    | 6          | 1964       | 1969 VP1           |     |         |
| 14 G      | 1              | 6    | 6          | 2188       | 2193 VP1           |     |         |

|    |     |   |   |    |      |      |          |
|----|-----|---|---|----|------|------|----------|
| 15 | GT  | 2 | 3 | 6  | 2808 | 2813 | VP1      |
| 16 | T   | 1 | 6 | 6  | 2845 | 2850 | NCS      |
| 17 | G   | 1 | 7 | 7  | 2944 | 2950 | LTA      |
| 18 | T   | 1 | 7 | 7  | 3337 | 3343 | LTA      |
| 19 | C   | 1 | 6 | 6  | 3537 | 3542 | LTA      |
| 20 | T   | 1 | 6 | 6  | 3761 | 3766 | LTA      |
| 21 | CT  | 2 | 3 | 6  | 3801 | 3806 | LTA      |
| 22 | T   | 1 | 6 | 6  | 3872 | 3877 | LTA      |
| 23 | AG  | 2 | 3 | 6  | 3899 | 3904 | LTA      |
| 24 | CA  | 2 | 3 | 6  | 4028 | 4033 | LTA      |
| 25 | A   | 1 | 6 | 6  | 4104 | 4109 | LTA      |
| 26 | T   | 1 | 7 | 7  | 4352 | 4358 | LTA      |
| 27 | TCT | 3 | 4 | 12 | 4484 | 4495 | LTA      |
| 28 | C   | 1 | 6 | 6  | 4661 | 4666 | NCS      |
| 29 | CT  | 2 | 3 | 6  | 4707 | 4712 | STA      |
| 30 | GA  | 2 | 3 | 6  | 4853 | 4858 | STA      |
| 31 | A   | 1 | 6 | 6  | 5110 | 5115 | STA, LTA |

### BM59

| S.No | Consensus Rep. | Size | Iterations | Tract-size | Start | End  | PROTEIN  |
|------|----------------|------|------------|------------|-------|------|----------|
| 1    | T              | 1    | 9          | 9          | 9     | 7    | 15 NCS   |
| 2    | CT             | 2    | 4          | 8          | 8     | 65   | 72 NCS   |
| 3    | A              | 1    | 7          | 7          | 122   | 128  | NCS      |
| 4    | GCT            | 3    | 3          | 9          | 151   | 159  | NCS      |
| 5    | TA             | 2    | 3          | 6          | 247   | 252  | NCS      |
| 6    | GT             | 2    | 3          | 6          | 389   | 394  | NCS      |
| 7    | T              | 1    | 6          | 6          | 408   | 413  | NCS      |
| 8    | AG             | 2    | 3          | 6          | 748   | 753  | VP2      |
| 9    | CAGG           | 4    | 3          | 11         | 1184  | 1194 | VP2, VP3 |
| 10   | AC             | 2    | 3          | 6          | 1828  | 1833 | VP1      |
| 11   | CT             | 2    | 3          | 6          | 1973  | 1978 | VP1      |
| 12   | T              | 1    | 7          | 7          | 2721  | 2727 | NCS      |
| 13   | AGA            | 3    | 4          | 12         | 2969  | 2980 | LTA      |
| 14   | GCT            | 3    | 3          | 9          | 3389  | 3397 | LTA      |
| 15   | T              | 1    | 6          | 6          | 3908  | 3913 | LTA      |
| 16   | CT             | 2    | 3          | 6          | 3965  | 3970 | LTA      |
| 17   | T              | 1    | 6          | 6          | 4203  | 4208 | LTA      |
| 18   | T              | 1    | 8          | 8          | 4319  | 4326 | LTA      |
| 19   | TA             | 2    | 3          | 6          | 4613  | 4618 | STA      |

### BM60

| S.No | Consensus Rep. | Size | Iterations | Tract-size | Start | End  | PROTEIN  |
|------|----------------|------|------------|------------|-------|------|----------|
| 1    | CG             | 2    | 3          | 6          | 37    | 42   | NCS      |
| 2    | GA             | 2    | 3          | 6          | 551   | 556  | VP2, VP3 |
| 3    | AAT            | 3    | 3          | 10         | 740   | 749  | VP2, VP3 |
| 4    | A              | 1    | 7          | 7          | 1150  | 1156 | VP1      |
| 5    | AG             | 2    | 6          | 11         | 1284  | 1294 | VP1      |
| 6    | TGG            | 3    | 5          | 15         | 1471  | 1485 | VP1      |
| 7    | AG             | 2    | 3          | 6          | 1547  | 1552 | VP1      |
| 8    | T              | 1    | 13         | 13         | 2159  | 2171 | NCS      |
| 9    | AT             | 2    | 3          | 6          | 2186  | 2191 | NCS      |
| 10   | TAG            | 3    | 4          | 12         | 2366  | 2377 | LTA      |
| 11   | A              | 1    | 6          | 6          | 2464  | 2469 | LTA      |
| 12   | T              | 1    | 7          | 7          | 2848  | 2854 | LTA      |
| 13   | TC             | 2    | 3          | 6          | 2962  | 2967 | LTA      |
| 14   | AT             | 2    | 3          | 6          | 3317  | 3322 | LTA      |
| 15   | GT             | 2    | 3          | 6          | 3461  | 3466 | LTA      |
| 16   | T              | 1    | 6          | 6          | 3584  | 3589 | LTA      |
| 17   | T              | 1    | 6          | 6          | 3604  | 3609 | LTA      |
| 18   | TC             | 2    | 3          | 6          | 3921  | 3926 | LTA      |
| 19   | TTC            | 3    | 4          | 12         | 3932  | 3943 | LTA, STA |
| 20   | A              | 1    | 6          | 6          | 4006  | 4011 | STA      |
| 21   | AGGC           | 4    | 3          | 12         | 4239  | 4250 | STA      |
| 22   | T              | 1    | 6          | 6          | 4632  | 4637 | NCS      |
| 23   | A              | 1    | 7          | 7          | 4685  | 4691 | NCS      |
| 24   | T              | 1    | 7          | 7          | 4720  | 4726 | NCS      |

### BM61

| S.No | Consensus Rep. | Size | Iterations | Tract-size | Start | End | PROTEIN |
|------|----------------|------|------------|------------|-------|-----|---------|
| 1    | A              | 1    | 11         | 11         | 92    | 102 | NCS     |
| 2    | ACT            | 3    | 3          | 9          | 293   | 301 | NCS     |
| 3    | A              | 1    | 6          | 6          | 330   | 335 | NCS     |

|    |      |   |   |    |      |      |                 |
|----|------|---|---|----|------|------|-----------------|
| 4  | GCG  | 3 | 4 | 12 | 417  | 428  | NCS             |
| 5  | AG   | 2 | 3 | 6  | 780  | 785  | VP2/3           |
| 6  | TGC  | 3 | 3 | 9  | 1014 | 1022 | VP2/3           |
| 7  | TA   | 2 | 3 | 6  | 1153 | 1158 | VP2/3, VP3      |
| 8  | TC   | 2 | 3 | 6  | 1619 | 1624 | VP2/3, VP3      |
| 9  | AGA  | 3 | 4 | 12 | 1653 | 1664 | VP2/3, VP3      |
| 10 | AGG  | 3 | 4 | 12 | 1667 | 1678 | VP2/3, VP3      |
| 11 | A    | 1 | 8 | 8  | 1687 | 1694 | VP2/3, VP3, VP1 |
| 12 | TAA  | 3 | 3 | 9  | 1725 | 1733 | VP2/3, VP3, VP1 |
| 13 | T    | 1 | 7 | 7  | 2104 | 2110 | VP1             |
| 14 | A    | 1 | 6 | 6  | 2293 | 2298 | VP1             |
| 15 | C    | 1 | 7 | 7  | 2343 | 2349 | VP1             |
| 16 | TA   | 2 | 3 | 6  | 2761 | 2766 | NCS             |
| 17 | ATT  | 3 | 3 | 10 | 3179 | 3188 | LTA             |
| 18 | CTAG | 4 | 3 | 11 | 3573 | 3583 | LTA             |
| 19 | T    | 1 | 6 | 6  | 3661 | 3666 | LTA             |
| 20 | AT   | 2 | 3 | 6  | 4071 | 4076 | LTA             |
| 21 | TA   | 2 | 3 | 6  | 4144 | 4149 | LTA             |
| 22 | T    | 1 | 6 | 6  | 4159 | 4164 | LTA             |
| 23 | T    | 1 | 6 | 6  | 4259 | 4264 | LTA             |
| 24 | T    | 1 | 6 | 6  | 4272 | 4277 | LTA             |
| 25 | AT   | 2 | 3 | 6  | 4477 | 4482 | LTA             |
| 26 | A    | 1 | 9 | 9  | 4551 | 4559 | NCS             |
| 27 | A    | 1 | 6 | 6  | 4950 | 4955 | LTA, STA        |
| 28 | T    | 1 | 6 | 6  | 5055 | 5060 | NCS             |

### BM62

| S.No | Consensus Rep. | Size | Iterations | Tract-size | Start | End  | PROTEIN       |
|------|----------------|------|------------|------------|-------|------|---------------|
| 1    | A              | 1    | 8          | 8          | 142   | 149  | NCS           |
| 2    | A              | 1    | 7          | 7          | 547   | 553  | AgP           |
| 3    | T              | 1    | 8          | 8          | 602   | 609  | NCS           |
| 4    | GCT            | 3    | 4          | 12         | 673   | 684  | VP2           |
| 5    | GCT            | 3    | 4          | 12         | 721   | 732  | VP2           |
| 6    | T              | 1    | 6          | 6          | 922   | 927  | VP2           |
| 7    | CA             | 2    | 3          | 6          | 1152  | 1157 | VP2, VP3      |
| 8    | AC             | 2    | 3          | 6          | 1363  | 1368 | VP2, VP3      |
| 9    | A              | 1    | 6          | 6          | 1460  | 1465 | VP2, VP3      |
| 10   | GAG            | 3    | 4          | 12         | 1659  | 1670 | VP2, VP3, VP1 |
| 11   | A              | 1    | 7          | 7          | 1817  | 1823 | VP1           |
| 12   | CA             | 2    | 3          | 6          | 1958  | 1963 | VP1           |
| 13   | T              | 1    | 8          | 8          | 2023  | 2030 | VP1           |
| 14   | AT             | 2    | 6          | 11         | 2948  | 2958 | LTA           |
| 15   | T              | 1    | 6          | 6          | 3107  | 3112 | LTA           |
| 16   | A              | 1    | 6          | 6          | 3118  | 3123 | LTA           |
| 17   | TC             | 2    | 3          | 6          | 3310  | 3315 | LTA           |
| 18   | CA             | 2    | 3          | 6          | 3476  | 3481 | LTA           |
| 19   | T              | 1    | 7          | 7          | 3548  | 3554 | LTA           |
| 20   | A              | 1    | 6          | 6          | 3580  | 3585 | LTA           |
| 21   | AT             | 2    | 3          | 6          | 3588  | 3593 | LTA           |
| 22   | AT             | 2    | 3          | 6          | 3643  | 3648 | LTA           |
| 23   | T              | 1    | 7          | 7          | 3761  | 3767 | LTA           |
| 24   | T              | 1    | 6          | 6          | 3803  | 3808 | LTA           |
| 25   | T              | 1    | 6          | 6          | 3894  | 3899 | LTA           |
| 26   | TAA            | 3    | 4          | 12         | 3939  | 3950 | LTA           |
| 27   | A              | 1    | 6          | 6          | 4144  | 4149 | LTA           |
| 28   | A              | 1    | 6          | 6          | 4215  | 4220 | LTA           |
| 29   | T              | 1    | 7          | 7          | 4283  | 4289 | LTA           |
| 30   | A              | 1    | 7          | 7          | 4577  | 4583 | NCS           |
| 31   | T              | 1    | 7          | 7          | 4980  | 4986 | LTA, STA      |
| 32   | CT             | 2    | 3          | 6          | 5140  | 5145 | LTA, STA      |

### BM63

Record removed. This record was removed by RefSeq staff. Please contact info@ncbi.nlm.nih.gov for further details.

### BM64

| S.No | Consensus Rep. | Size | Iterations | Tract-size | Start | End | PROTEIN |
|------|----------------|------|------------|------------|-------|-----|---------|
| 1    | AT             | 2    | 3          | 6          | 19    | 24  | NCS     |
| 2    | A              | 1    | 6          | 6          | 150   | 155 | NCS     |
| 3    | AAAG           | 4    | 3          | 13         | 425   | 437 | NCS     |

|    |        |   |   |    |      |                    |
|----|--------|---|---|----|------|--------------------|
| 4  | GTGGCA | 6 | 3 | 19 | 497  | 515 NCS            |
| 5  | GT     | 2 | 3 | 6  | 542  | 547 NCS            |
| 6  | T      | 1 | 6 | 6  | 672  | 677 NCS            |
| 7  | CT     | 2 | 6 | 11 | 845  | 855 VP2            |
| 8  | T      | 1 | 6 | 6  | 1078 | 1083 VP2, VP3      |
| 9  | AT     | 2 | 4 | 8  | 1316 | 1323 VP2, VP3      |
| 10 | AG     | 2 | 3 | 6  | 1345 | 1350 VP2, VP3      |
| 11 | A      | 1 | 6 | 6  | 1403 | 1408 VP2, VP3      |
| 12 | A      | 1 | 6 | 6  | 1567 | 1572 VP2, VP3      |
| 13 | AGA    | 3 | 4 | 12 | 1578 | 1589 VP2, VP3      |
| 14 | A      | 1 | 6 | 6  | 1611 | 1616 VP2, VP3, VP1 |
| 15 | CAG    | 3 | 3 | 9  | 1638 | 1646 VP2, VP3, VP1 |
| 16 | CA     | 2 | 3 | 6  | 2093 | 2098 VP1           |
| 17 | AAT    | 3 | 4 | 11 | 2411 | 2421 VP1           |
| 18 | GGT    | 3 | 4 | 12 | 2833 | 2844 LTA           |
| 19 | CT     | 2 | 3 | 6  | 2961 | 2966 LTA           |
| 20 | T      | 1 | 8 | 8  | 3243 | 3250 LTA           |
| 21 | TGC    | 3 | 3 | 9  | 3462 | 3470 LTA           |
| 22 | AC     | 2 | 3 | 6  | 3786 | 3791 LTA           |
| 23 | T      | 1 | 7 | 7  | 4065 | 4071 LTA           |
| 24 | T      | 1 | 6 | 6  | 4137 | 4142 LTA           |
| 25 | T      | 1 | 9 | 9  | 4396 | 4404 LTA           |
| 26 | TG     | 2 | 5 | 10 | 4417 | 4426 LTA           |
| 27 | CTC    | 3 | 4 | 12 | 4428 | 4439 LTA           |
| 28 | C      | 1 | 6 | 6  | 4581 | 4586 NCS           |
| 29 | CA     | 2 | 3 | 6  | 4596 | 4601 NCS           |
| 30 | TC     | 2 | 3 | 6  | 4622 | 4627 STA           |
| 31 | CA     | 2 | 3 | 6  | 4730 | 4735 STA           |
| 32 | T      | 1 | 6 | 6  | 4761 | 4766 STA           |
| 33 | GA     | 2 | 3 | 6  | 4869 | 4874 STA           |
| 34 | T      | 1 | 6 | 6  | 4954 | 4959 STA, LTA      |
| 35 | T      | 1 | 6 | 6  | 4983 | 4988 STA, LTA      |

#### BM65

| S.No | Consensus Rep. | Size | Iterations | Tract-size | Start | End  | PROTEIN       |
|------|----------------|------|------------|------------|-------|------|---------------|
| 1    | T              | 1    | 6          | 6          | 1     | 6    | NCS           |
| 2    | TGC            | 3    | 4          | 12         | 27    | 38   | NCS           |
| 3    | A              | 1    | 6          | 6          | 68    | 73   | NCS           |
| 4    | A              | 1    | 6          | 6          | 117   | 122  | NCS           |
| 5    | GC             | 2    | 3          | 6          | 138   | 143  | NCS           |
| 6    | TAAG           | 4    | 3          | 11         | 332   | 342  | NCS           |
| 7    | GGA            | 3    | 4          | 12         | 343   | 354  | NCS           |
| 8    | A              | 1    | 7          | 7          | 366   | 372  | NCS           |
| 9    | T              | 1    | 7          | 7          | 580   | 586  | NCS           |
| 10   | T              | 1    | 8          | 8          | 992   | 999  | VP2, VP3      |
| 11   | T              | 1    | 6          | 6          | 1189  | 1194 | VP2, VP3      |
| 12   | TA             | 2    | 3          | 6          | 1235  | 1240 | VP2, VP3      |
| 13   | AG             | 2    | 3          | 6          | 1261  | 1266 | VP2, VP3      |
| 14   | AC             | 2    | 3          | 6          | 1419  | 1424 | VP2, VP3      |
| 15   | AGA            | 3    | 4          | 12         | 1494  | 1505 | VP2, VP3      |
| 16   | A              | 1    | 6          | 6          | 1524  | 1529 | VP2, VP3, VP1 |
| 17   | CAG            | 3    | 3          | 9          | 1551  | 1559 | VP2, VP3, VP1 |
| 18   | CA             | 2    | 6          | 11         | 1734  | 1744 | VP1           |
| 19   | A              | 1    | 7          | 7          | 1889  | 1895 | VP1           |
| 20   | A              | 1    | 6          | 6          | 2134  | 2139 | VP1           |
| 21   | G              | 1    | 6          | 6          | 2171  | 2176 | VP1           |
| 22   | AGG            | 3    | 4          | 12         | 2738  | 2749 | LTA           |
| 23   | ATC            | 3    | 4          | 12         | 2780  | 2791 | LTA           |
| 24   | TTC            | 3    | 5          | 15         | 2789  | 2803 | LTA           |
| 25   | A              | 1    | 6          | 6          | 2835  | 2840 | LTA           |
| 26   | CT             | 2    | 3          | 6          | 2864  | 2869 | LTA           |
| 27   | ATTAAC         | 6    | 3          | 18         | 2943  | 2960 | LTA           |
| 28   | T              | 1    | 8          | 8          | 3146  | 3153 | LTA           |
| 29   | TGC            | 3    | 3          | 9          | 3365  | 3373 | LTA           |
| 30   | AT             | 2    | 3          | 6          | 3516  | 3521 | LTA           |
| 31   | CTG            | 3    | 3          | 10         | 3658  | 3667 | LTA           |
| 32   | CAT            | 3    | 4          | 11         | 3826  | 3836 | LTA           |
| 33   | T              | 1    | 7          | 7          | 3968  | 3974 | LTA           |
| 34   | T              | 1    | 6          | 6          | 4040  | 4045 | LTA           |
| 35   | TA             | 2    | 3          | 6          | 4168  | 4173 | LTA           |
| 36   | T              | 1    | 6          | 6          | 4183  | 4188 | LTA           |
| 37   | GT             | 2    | 3          | 6          | 4282  | 4287 | LTA           |
| 38   | T              | 1    | 9          | 9          | 4298  | 4306 | LTA           |
| 39   | TTC            | 3    | 7          | 21         | 4331  | 4351 | LTA           |

|           |   |   |    |      |               |
|-----------|---|---|----|------|---------------|
| 40 TC     | 2 | 3 | 6  | 4404 | 4409 LTA      |
| 41 T      | 1 | 6 | 6  | 4482 | 4487 NCS      |
| 42 TA     | 2 | 3 | 6  | 4515 | 4520 STA      |
| 43 TC     | 2 | 3 | 6  | 4527 | 4532 STA      |
| 44 T      | 1 | 7 | 7  | 4676 | 4682 STA      |
| 45 AGC    | 3 | 3 | 9  | 4699 | 4707 STA      |
| 46 ATTG   | 4 | 3 | 12 | 4870 | 4881 STA, LTA |
| 47 TTTTCA | 6 | 3 | 17 | 4882 | 4898 STA, LTA |

### BM66

| S.No  | Consensus Rep. | Size | Iterations | Tract-size | Start | End  | PROTEIN  |
|-------|----------------|------|------------|------------|-------|------|----------|
| 1 CCT |                | 3    | 3          | 10         | 34    | 43   | NCS      |
| 2 T   |                | 1    | 9          | 9          | 43    | 51   | NCS      |
| 3 TA  |                | 2    | 6          | 11         | 83    | 93   | NCS      |
| 4 A   |                | 1    | 8          | 8          | 93    | 100  | NCS      |
| 5 G   |                | 1    | 6          | 6          | 145   | 150  | NCS      |
| 6 TGC |                | 3    | 4          | 12         | 597   | 608  | VP2      |
| 7 CTG |                | 3    | 4          | 12         | 737   | 748  | VP2      |
| 8 GA  |                | 2    | 4          | 8          | 1549  | 1556 | VP2      |
| 9 A   |                | 1    | 7          | 7          | 1678  | 1684 | VP2, VP1 |
| 10 A  |                | 1    | 6          | 6          | 2082  | 2087 | VP1      |
| 11 CA |                | 2    | 6          | 11         | 2119  | 2129 | VP1      |
| 12 C  |                | 1    | 7          | 7          | 2259  | 2265 | VP1      |
| 13 TC |                | 2    | 3          | 6          | 2704  | 2709 | LTA      |
| 14 G  |                | 1    | 6          | 6          | 2942  | 2947 | LTA      |
| 15 CA |                | 2    | 3          | 6          | 3032  | 3037 | LTA      |
| 16 CT |                | 2    | 3          | 6          | 3493  | 3498 | LTA      |
| 17 A  |                | 1    | 7          | 7          | 3681  | 3687 | LTA      |
| 18 CA |                | 2    | 3          | 6          | 3835  | 3840 | LTA      |
| 19 GT |                | 2    | 3          | 6          | 4059  | 4064 | LTA      |
| 20 G  |                | 1    | 6          | 6          | 4163  | 4168 | LTA      |
| 21 TC |                | 2    | 3          | 6          | 4369  | 4374 | LTA      |
| 22 A  |                | 1    | 9          | 9          | 4473  | 4481 | NCS      |
| 23 A  |                | 1    | 7          | 7          | 4588  | 4594 | STA      |
| 24 T  |                | 1    | 8          | 8          | 4680  | 4687 | STA      |
| 25 C  |                | 1    | 6          | 6          | 4965  | 4970 | STA, LTA |

### BM67

| S.No   | Consensus Rep. | Size | Iterations | Tract-size | Start | End  | PROTEIN       |
|--------|----------------|------|------------|------------|-------|------|---------------|
| 1 T    |                | 1    | 7          | 7          | 8     | 14   | NCS           |
| 2 CCT  |                | 3    | 3          | 10         | 43    | 52   | NCS           |
| 3 T    |                | 1    | 6          | 6          | 52    | 57   | NCS           |
| 4 AT   |                | 2    | 3          | 6          | 94    | 99   | NCS           |
| 5 A    |                | 1    | 7          | 7          | 104   | 110  | NCS           |
| 6 A    |                | 1    | 7          | 7          | 398   | 404  | NCS           |
| 7 CTC  |                | 3    | 4          | 11         | 532   | 542  | AgP           |
| 8 GCT  |                | 3    | 4          | 12         | 1021  | 1032 | VP2           |
| 9 TGC  |                | 3    | 4          | 12         | 1074  | 1085 | VP2           |
| 10 TTA |                | 3    | 5          | 15         | 1095  | 1109 | VP2           |
| 11 CTT |                | 3    | 4          | 12         | 1636  | 1647 | VP2, VP3      |
| 12 TC  |                | 2    | 3          | 6          | 1670  | 1675 | VP2, VP3      |
| 13 AGA |                | 3    | 5          | 15         | 1704  | 1718 | VP2, VP3, VP1 |
| 14 A   |                | 1    | 7          | 7          | 1727  | 1733 | VP2, VP3, VP1 |
| 15 A   |                | 1    | 9          | 9          | 1922  | 1930 | VP1           |
| 16 A   |                | 1    | 6          | 6          | 1948  | 1953 | VP1           |
| 17 TA  |                | 2    | 3          | 6          | 2189  | 2194 | VP1           |
| 18 TGC |                | 3    | 4          | 12         | 2485  | 2496 | VP1           |
| 19 AGA |                | 3    | 3          | 9          | 2515  | 2523 | VP1           |
| 20 AC  |                | 2    | 3          | 6          | 2619  | 2624 | VP1           |
| 21 TG  |                | 2    | 5          | 10         | 2853  | 2862 | LTA           |
| 22 TC  |                | 2    | 3          | 6          | 2967  | 2972 | LTA           |
| 23 AG  |                | 2    | 3          | 6          | 2999  | 3004 | LTA           |
| 24 T   |                | 1    | 8          | 8          | 3091  | 3098 | LTA           |
| 25 T   |                | 1    | 8          | 8          | 3233  | 3240 | LTA           |
| 26 GCT |                | 3    | 3          | 9          | 3453  | 3461 | LTA           |
| 27 AC  |                | 2    | 3          | 6          | 3531  | 3536 | LTA           |
| 28 AT  |                | 2    | 3          | 6          | 3609  | 3614 | LTA           |
| 29 CA  |                | 2    | 3          | 6          | 3925  | 3930 | LTA           |
| 30 A   |                | 1    | 7          | 7          | 3998  | 4004 | LTA           |
| 31 AC  |                | 2    | 3          | 6          | 4056  | 4061 | LTA           |
| 32 A   |                | 1    | 6          | 6          | 4107  | 4112 | LTA           |
| 33 T   |                | 1    | 13         | 13         | 4378  | 4390 | LTA           |
| 34 TTC |                | 3    | 4          | 12         | 4418  | 4429 | LTA           |

|          |   |   |    |      |               |
|----------|---|---|----|------|---------------|
| 35 T     | 1 | 6 | 6  | 4441 | 4446 LTA      |
| 36 CTT   | 3 | 4 | 12 | 4453 | 4464 LTA      |
| 37 CAAAA | 5 | 3 | 15 | 4491 | 4505 LTA      |
| 38 A     | 1 | 6 | 6  | 4564 | 4569 NCS      |
| 39 TA    | 2 | 3 | 6  | 4639 | 4644 STA      |
| 40 A     | 1 | 6 | 6  | 4972 | 4977 STA, LTA |

### BM68

| S.No     | Consensus Rep. | Size | Iterations | Tract-size | Start         | End | PROTEIN |
|----------|----------------|------|------------|------------|---------------|-----|---------|
| 1 T      | 1              | 7    | 7          | 8          | 14 NCS        |     |         |
| 2 TA     | 2              | 4    | 8          | 93         | 100 NCS       |     |         |
| 3 A      | 1              | 7    | 7          | 104        | 110 NCS       |     |         |
| 4 AGG    | 3              | 3    | 9          | 237        | 245 NCS       |     |         |
| 5 GT     | 2              | 3    | 6          | 300        | 305 NCS       |     |         |
| 6 A      | 1              | 7    | 7          | 398        | 404 NCS       |     |         |
| 7 TGC    | 3              | 4    | 12         | 1063       | 1074 VP2      |     |         |
| 8 TTA    | 3              | 4    | 12         | 1084       | 1095 VP2      |     |         |
| 9 AG     | 2              | 3    | 6          | 1334       | 1339 VP2      |     |         |
| 10 CTT   | 3              | 4    | 12         | 1625       | 1636 VP2      |     |         |
| 11 TC    | 2              | 3    | 6          | 1659       | 1664 VP2      |     |         |
| 12 AGA   | 3              | 5    | 15         | 1693       | 1707 VP2, VP1 |     |         |
| 13 A     | 1              | 7    | 7          | 1716       | 1722 VP2, VP1 |     |         |
| 14 A     | 1              | 6    | 6          | 1914       | 1919 VP1      |     |         |
| 15 AG    | 2              | 3    | 6          | 2092       | 2097 VP1      |     |         |
| 16 T     | 1              | 7    | 7          | 2141       | 2147 VP1      |     |         |
| 17 A     | 1              | 6    | 6          | 2269       | 2274 VP1      |     |         |
| 18 AC    | 2              | 3    | 6          | 2377       | 2382 VP1      |     |         |
| 19 AC    | 2              | 3    | 6          | 2608       | 2613 VP1      |     |         |
| 20 ATTTT | 5              | 3    | 16         | 2781       | 2796 NCS      |     |         |
| 21 ATA   | 3              | 3    | 10         | 2950       | 2959 LTA      |     |         |
| 22 T     | 1              | 7    | 7          | 2971       | 2977 LTA      |     |         |
| 23 A     | 1              | 6    | 6          | 2998       | 3003 LTA      |     |         |
| 24 T     | 1              | 6    | 6          | 3089       | 3094 LTA      |     |         |
| 25 AT    | 2              | 3    | 6          | 3118       | 3123 LTA      |     |         |
| 26 T     | 1              | 7    | 7          | 3213       | 3219 LTA      |     |         |
| 27 CA    | 2              | 3    | 6          | 3432       | 3437 LTA      |     |         |
| 28 GCT   | 3              | 3    | 9          | 3449       | 3457 LTA      |     |         |
| 29 AC    | 2              | 3    | 6          | 3527       | 3532 LTA      |     |         |
| 30 TTTCA | 5              | 3    | 16         | 3556       | 3571 LTA      |     |         |
| 31 CAA   | 3              | 3    | 9          | 3834       | 3842 LTA      |     |         |
| 32 CA    | 2              | 3    | 6          | 3921       | 3926 LTA      |     |         |
| 33 CTTG  | 4              | 3    | 11         | 3974       | 3984 LTA      |     |         |
| 34 CA    | 2              | 4    | 8          | 4051       | 4058 LTA      |     |         |
| 35 T     | 1              | 6    | 6          | 4263       | 4268 LTA      |     |         |
| 36 A     | 1              | 6    | 6          | 4286       | 4291 LTA      |     |         |
| 37 TC    | 2              | 3    | 6          | 4355       | 4360 LTA      |     |         |
| 38 T     | 1              | 13   | 13         | 4374       | 4386 LTA      |     |         |
| 39 TCA   | 3              | 4    | 12         | 4415       | 4426 LTA      |     |         |
| 40 CTT   | 3              | 4    | 12         | 4446       | 4457 LTA      |     |         |
| 41 CAAAA | 5              | 3    | 15         | 4484       | 4498 LTA      |     |         |
| 42 A     | 1              | 6    | 6          | 4557       | 4562 NCS      |     |         |
| 43 CAA   | 3              | 4    | 11         | 4776       | 4786 STA      |     |         |
| 44 ATC   | 3              | 3    | 10         | 4845       | 4854 STA, LTA |     |         |
| 45 A     | 1              | 6    | 6          | 4964       | 4969 STA, LTA |     |         |
| 46 TG    | 2              | 3    | 6          | 5056       | 5061 STA, LTA |     |         |

### BM69

| S.No   | Consensus Rep. | Size | Iterations | Tract-size | Start              | End | PROTEIN |
|--------|----------------|------|------------|------------|--------------------|-----|---------|
| 1 CCT  | 3              | 4    | 12         | 43         | 54 NCS             |     |         |
| 2 TA   | 2              | 3    | 6          | 102        | 107 NCS            |     |         |
| 3 A    | 1              | 7    | 7          | 109        | 115 NCS            |     |         |
| 4 T    | 1              | 7    | 7          | 451        | 457 NCS            |     |         |
| 5 GCA  | 3              | 4    | 12         | 579        | 590 VP2            |     |         |
| 6 G    | 1              | 7    | 7          | 792        | 798 VP2            |     |         |
| 7 AAT  | 3              | 3    | 10         | 1190       | 1199 VP2, VP3      |     |         |
| 8 CAG  | 3              | 3    | 9          | 1279       | 1287 VP2, VP3      |     |         |
| 9 A    | 1              | 7    | 7          | 1557       | 1563 VP2, VP3, VP1 |     |         |
| 10 A   | 1              | 7    | 7          | 1608       | 1614 VP2, VP3, VP1 |     |         |
| 11 T   | 1              | 6    | 6          | 2383       | 2388 VP1           |     |         |
| 12 ATC | 3              | 3    | 9          | 2719       | 2727 LTA           |     |         |
| 13 TTC | 3              | 3    | 9          | 2749       | 2757 LTA           |     |         |
| 14 T   | 1              | 6    | 6          | 2820       | 2825 LTA           |     |         |
| 15 T   | 1              | 6    | 6          | 2960       | 2965 LTA           |     |         |

|         |   |   |    |      |               |
|---------|---|---|----|------|---------------|
| 16 T    | 1 | 6 | 6  | 2983 | 2988 LTA      |
| 17 T    | 1 | 8 | 8  | 3100 | 3107 LTA      |
| 18 CA   | 2 | 3 | 6  | 3306 | 3311 LTA      |
| 19 T    | 1 | 7 | 7  | 3626 | 3632 LTA      |
| 20 ATT  | 3 | 4 | 11 | 3661 | 3671 LTA      |
| 21 T    | 1 | 6 | 6  | 3705 | 3710 LTA      |
| 22 CAT  | 3 | 4 | 11 | 3777 | 3787 LTA      |
| 23 T    | 1 | 8 | 8  | 3835 | 3842 LTA      |
| 24 CA   | 2 | 3 | 6  | 3906 | 3911 LTA      |
| 25 TA   | 2 | 3 | 6  | 3939 | 3944 LTA      |
| 26 AT   | 2 | 3 | 6  | 3949 | 3954 LTA      |
| 27 T    | 1 | 6 | 6  | 4120 | 4125 LTA      |
| 28 GATT | 4 | 3 | 12 | 4131 | 4142 LTA      |
| 29 T    | 1 | 6 | 6  | 4265 | 4270 LTA      |
| 30 T    | 1 | 6 | 6  | 4320 | 4325 LTA      |
| 31 T    | 1 | 7 | 7  | 4431 | 4437 NCS      |
| 32 A    | 1 | 8 | 8  | 4498 | 4505 STA      |
| 33 CTT  | 3 | 3 | 9  | 4634 | 4642 STA      |
| 34 A    | 1 | 6 | 6  | 4719 | 4724 STA      |
| 35 TA   | 2 | 3 | 6  | 4875 | 4880 STA, LTA |
| 36 T    | 1 | 6 | 6  | 4899 | 4904 STA, LTA |
| 37 CT   | 2 | 3 | 6  | 5029 | 5034 STA, LTA |

### BM70

| S.No    | Consensus | Rep. Size | Iterations | Tract-size | Start | End  | PROTEIN  |
|---------|-----------|-----------|------------|------------|-------|------|----------|
| 1 T     |           | 1         | 6          | 6          | 2     | 7    | NCS      |
| 2 GCT   |           | 3         | 4          | 12         | 34    | 45   | NCS      |
| 3 A     |           | 1         | 7          | 7          | 73    | 79   | NCS      |
| 4 A     |           | 1         | 7          | 7          | 99    | 105  | AgP      |
| 5 T     |           | 1         | 6          | 6          | 313   | 318  | NCS      |
| 6 GCA   |           | 3         | 4          | 12         | 451   | 462  | VP2      |
| 7 CT    |           | 2         | 3          | 6          | 675   | 680  | VP2      |
| 8 TCC   |           | 3         | 3          | 10         | 684   | 693  | VP2      |
| 9 GA    |           | 2         | 3          | 6          | 894   | 899  | VP2, VP3 |
| 10 T    |           | 1         | 6          | 6          | 946   | 951  | VP2, VP3 |
| 11 A    |           | 1         | 6          | 6          | 1237  | 1242 | VP2, VP3 |
| 12 TGA  |           | 3         | 5          | 15         | 1480  | 1494 | VP1      |
| 13 AT   |           | 2         | 3          | 6          | 2314  | 2319 | VP1      |
| 14 A    |           | 1         | 6          | 6          | 2358  | 2363 | VP1      |
| 15 T    |           | 1         | 6          | 6          | 2769  | 2774 | NCS      |
| 16 ATT  |           | 3         | 4          | 11         | 2775  | 2785 | NCS      |
| 17 A    |           | 1         | 6          | 6          | 2810  | 2815 | NCS      |
| 18 TG   |           | 2         | 3          | 6          | 2840  | 2845 | LTA      |
| 19 TG   |           | 2         | 3          | 6          | 2852  | 2857 | LTA      |
| 20 AG   |           | 2         | 3          | 6          | 3073  | 3078 | LTA      |
| 21 AT   |           | 2         | 3          | 6          | 3082  | 3087 | LTA      |
| 22 T    |           | 1         | 6          | 6          | 3175  | 3180 | LTA      |
| 23 CA   |           | 2         | 3          | 6          | 3310  | 3315 | LTA      |
| 24 AT   |           | 2         | 3          | 6          | 3661  | 3666 | LTA      |
| 25 T    |           | 1         | 7          | 7          | 3818  | 3824 | LTA      |
| 26 CT   |           | 2         | 3          | 6          | 3833  | 3838 | LTA      |
| 27 GT   |           | 2         | 3          | 6          | 3883  | 3888 | LTA      |
| 28 C    |           | 1         | 6          | 6          | 4052  | 4057 | LTA      |
| 29 TACA |           | 4         | 3          | 11         | 4134  | 4144 | LTA      |
| 30 T    |           | 1         | 6          | 6          | 4409  | 4414 | LTA      |
| 31 A    |           | 1         | 6          | 6          | 4554  | 4559 | STA      |
| 32 TA   |           | 2         | 3          | 6          | 4935  | 4940 | LTA, STA |

### BM71

| S.No    | Consensus | Rep. Size | Iterations | Tract-size | Start | End  | PROTEIN       |
|---------|-----------|-----------|------------|------------|-------|------|---------------|
| 1 CAG   |           | 3         | 3          | 10         | 41    | 50   | NCS           |
| 2 TC    |           | 2         | 3          | 6          | 105   | 110  | NCS           |
| 3 A     |           | 1         | 6          | 6          | 158   | 163  | NCS           |
| 4 T     |           | 1         | 6          | 6          | 226   | 231  | NCS           |
| 5 TGTTT |           | 5         | 3          | 15         | 296   | 310  | NCS           |
| 6 GCT   |           | 3         | 4          | 12         | 410   | 421  | VP2           |
| 7 CTG   |           | 3         | 4          | 12         | 507   | 518  | VP2           |
| 8 TA    |           | 2         | 3          | 6          | 652   | 657  | VP2           |
| 9 G     |           | 1         | 8          | 8          | 1161  | 1168 | VP2, VP3      |
| 10 A    |           | 1         | 7          | 7          | 1340  | 1346 | VP2, VP3, VP1 |
| 11 TG   |           | 2         | 3          | 6          | 1558  | 1563 | VP1           |
| 12 TTTG |           | 4         | 3          | 12         | 1571  | 1582 | VP1           |
| 13 AT   |           | 2         | 3          | 6          | 1640  | 1645 | VP1           |

|        |   |   |    |      |               |
|--------|---|---|----|------|---------------|
| 14 TA  | 2 | 3 | 6  | 2015 | 2020 VP1      |
| 15 T   | 1 | 6 | 6  | 2124 | 2129 VP1      |
| 16 TA  | 2 | 3 | 6  | 2351 | 2356 VP1      |
| 17 CA  | 2 | 3 | 6  | 2989 | 2994 LTA      |
| 18 AC  | 2 | 3 | 6  | 3092 | 3097 LTA      |
| 19 AC  | 2 | 3 | 6  | 3165 | 3170 LTA      |
| 20 T   | 1 | 7 | 7  | 3246 | 3252 LTA      |
| 21 T   | 1 | 6 | 6  | 3697 | 3702 LTA      |
| 22 TCT | 3 | 4 | 12 | 4172 | 4183 LTA      |
| 23 AC  | 2 | 3 | 6  | 4592 | 4597 STA      |
| 24 T   | 1 | 6 | 6  | 4773 | 4778 LTA, STA |
| 25 T   | 1 | 6 | 6  | 4807 | 4812 LTA, STA |

## BM72

| S.No   | Consensus Rep. | Size | Iterations | Tract-size | Start | End  | PROTEIN       |
|--------|----------------|------|------------|------------|-------|------|---------------|
| 1 TC   |                | 2    | 3          | 6          | 9     | 14   | NCS           |
| 2 TC   |                | 2    | 3          | 6          | 71    | 76   | NCS           |
| 3 A    |                | 1    | 8          | 8          | 125   | 132  | NCS           |
| 4 GGA  |                | 3    | 4          | 12         | 133   | 144  | NCS           |
| 5 TC   |                | 2    | 3          | 6          | 250   | 255  | NCS           |
| 6 TC   |                | 2    | 6          | 11         | 317   | 327  | NCS           |
| 7 TGC  |                | 3    | 4          | 11         | 520   | 530  | VP2           |
| 8 AG   |                | 2    | 3          | 6          | 905   | 910  | VP2, VP3      |
| 9 AC   |                | 2    | 3          | 6          | 1131  | 1136 | VP2, VP3      |
| 10 CA  |                | 2    | 3          | 6          | 1334  | 1339 | VP2, VP3, VP1 |
| 11 TG  |                | 2    | 3          | 6          | 1576  | 1581 | VP1           |
| 12 A   |                | 1    | 6          | 6          | 1889  | 1894 | VP1           |
| 13 GT  |                | 2    | 3          | 6          | 2023  | 2028 | VP1           |
| 14 T   |                | 1    | 6          | 6          | 2133  | 2138 | VP1           |
| 15 TGC |                | 3    | 4          | 12         | 2378  | 2389 | VP1           |
| 16 GCA |                | 3    | 3          | 10         | 2767  | 2776 | LTA           |
| 17 T   |                | 1    | 7          | 7          | 2801  | 2807 | LTA           |
| 18 T   |                | 1    | 7          | 7          | 2834  | 2840 | LTA           |
| 19 AC  |                | 2    | 3          | 6          | 2986  | 2991 | LTA           |
| 20 TGG |                | 3    | 4          | 12         | 3544  | 3555 | LTA           |
| 21 T   |                | 1    | 6          | 6          | 3693  | 3698 | LTA           |
| 22 CT  |                | 2    | 3          | 6          | 3744  | 3749 | LTA           |
| 23 T   |                | 1    | 6          | 6          | 3796  | 3801 | LTA           |
| 24 T   |                | 1    | 6          | 6          | 3840  | 3845 | LTA           |
| 25 A   |                | 1    | 6          | 6          | 3891  | 3896 | LTA           |
| 26 T   |                | 1    | 7          | 7          | 4099  | 4105 | LTA           |
| 27 TTC |                | 3    | 4          | 12         | 4182  | 4193 | LTA           |
| 28 CTT |                | 3    | 3          | 9          | 4554  | 4562 | STA           |
| 29 AC  |                | 2    | 3          | 6          | 4618  | 4623 | STA           |
| 30 T   |                | 1    | 6          | 6          | 4642  | 4647 | STA           |
| 31 TC  |                | 2    | 3          | 6          | 4750  | 4755 | STA, LTA      |

## BM73

| S.No    | Consensus Rep. | Size | Iterations | Tract-size | Start | End  | PROTEIN  |
|---------|----------------|------|------------|------------|-------|------|----------|
| 1 TA    |                | 2    | 3          | 6          | 112   | 117  | NCS      |
| 2 A     |                | 1    | 6          | 6          | 119   | 124  | NCS      |
| 3 CTT   |                | 3    | 4          | 12         | 612   | 623  | VP2      |
| 4 TA    |                | 2    | 3          | 6          | 660   | 665  | VP2      |
| 5 T     |                | 1    | 6          | 6          | 1188  | 1193 | VP2, VP3 |
| 6 TA    |                | 2    | 3          | 6          | 1214  | 1219 | VP2, VP3 |
| 7 T     |                | 1    | 7          | 7          | 1312  | 1318 | VP2, VP3 |
| 8 GAA   |                | 3    | 4          | 12         | 1331  | 1342 | VP2, VP3 |
| 9 A     |                | 1    | 6          | 6          | 1416  | 1421 | VP1      |
| 10 GT   |                | 2    | 3          | 6          | 1422  | 1427 | VP1      |
| 11 A    |                | 1    | 6          | 6          | 2069  | 2074 | VP1      |
| 12 T    |                | 1    | 7          | 7          | 2834  | 2840 | LTA      |
| 13 T    |                | 1    | 7          | 7          | 2961  | 2967 | LTA      |
| 14 T    |                | 1    | 7          | 7          | 2978  | 2984 | LTA      |
| 15 AT   |                | 2    | 3          | 6          | 3110  | 3115 | LTA      |
| 16 AT   |                | 2    | 3          | 6          | 3353  | 3358 | LTA      |
| 17 T    |                | 1    | 6          | 6          | 3393  | 3398 | LTA      |
| 18 T    |                | 1    | 6          | 6          | 3504  | 3509 | LTA      |
| 19 T    |                | 1    | 8          | 8          | 3580  | 3587 | LTA      |
| 20 T    |                | 1    | 6          | 6          | 3872  | 3877 | LTA      |
| 21 A    |                | 1    | 7          | 7          | 4340  | 4346 | STA      |
| 22 AGCA |                | 4    | 3          | 13         | 4377  | 4389 | STA      |
| 23 A    |                | 1    | 7          | 7          | 4426  | 4432 | STA      |
| 24 AT   |                | 2    | 6          | 11         | 4611  | 4621 | STA      |

|      |   |   |   |      |               |
|------|---|---|---|------|---------------|
| 25 T | 1 | 6 | 6 | 4621 | 4626 STA      |
| 26 T | 1 | 6 | 6 | 4774 | 4779 STA, LTA |

#### BM74

| S.No | Consensus Rep. | Size | Iterations | Tract-size | Start | End  | PROTEIN       |
|------|----------------|------|------------|------------|-------|------|---------------|
| 1    | AT             | 2    | 3          | 8          | 59    | 66   | NCS           |
| 2    | A              | 1    | 6          | 6          | 70    | 75   | NCS           |
| 3    | TG             | 2    | 3          | 6          | 82    | 87   | NCS           |
| 4    | TA             | 2    | 3          | 6          | 278   | 283  | NCS           |
| 5    | TGC            | 3    | 4          | 12         | 436   | 447  | VP2           |
| 6    | TTA            | 3    | 3          | 9          | 593   | 601  | VP2           |
| 7    | ATT            | 3    | 3          | 9          | 987   | 995  | VP2, VP3      |
| 8    | CT             | 2    | 5          | 10         | 2021  | 2030 | VP1           |
| 9    | TCT            | 3    | 3          | 9          | 2280  | 2288 | VP1           |
| 10   | T              | 1    | 7          | 7          | 2561  | 2567 | LTA           |
| 11   | T              | 1    | 7          | 7          | 2749  | 2755 | LTA           |
| 12   | T              | 1    | 8          | 8          | 2878  | 2885 | LTA           |
| 13   | AC             | 2    | 3          | 6          | 2900  | 2905 | LTA           |
| 14   | T              | 1    | 6          | 6          | 3402  | 3407 | LTA           |
| 15   | ATT            | 3    | 4          | 11         | 3436  | 3446 | LTA           |
| 16   | CT             | 2    | 3          | 6          | 3509  | 3514 | LTA           |
| 17   | AT             | 2    | 3          | 6          | 3526  | 3531 | LTA           |
| 18   | T              | 1    | 6          | 6          | 3770  | 3775 | LTA           |
| 19   | TA             | 2    | 3          | 6          | 3914  | 3919 | LTA           |
| 20   | A              | 1    | 6          | 6          | 3962  | 3967 | LTA           |
| 21   | T              | 1    | 6          | 6          | 4059  | 4064 | LTA, MTA      |
| 22   | TCA            | 3    | 3          | 9          | 4082  | 4090 | LTA, MTA      |
| 23   | T              | 1    | 7          | 7          | 4366  | 4372 | MTA, STA      |
| 24   | AC             | 2    | 3          | 6          | 4406  | 4411 | MTA, STA      |
| 25   | AAC            | 3    | 3          | 9          | 4517  | 4525 | MTA, STA      |
| 26   | AG             | 2    | 4          | 8          | 4759  | 4766 | MTA, STA, LTA |

#### BM75

| S.No | Consensus Rep. | Size | Iterations | Tract-size | Start | End  | PROTEIN                                |
|------|----------------|------|------------|------------|-------|------|----------------------------------------|
| 1    | AG             | 2    | 3          | 6          | 48    | 53   | NCS                                    |
| 2    | T              | 1    | 6          | 6          | 59    | 64   | NCS                                    |
| 3    | A              | 1    | 6          | 6          | 121   | 126  | NCS                                    |
| 4    | AT             | 2    | 3          | 6          | 175   | 180  | NCS                                    |
| 5    | CG             | 2    | 4          | 8          | 267   | 274  | NCS                                    |
| 6    | T              | 1    | 7          | 7          | 440   | 446  | NCS                                    |
| 7    | C              | 1    | 6          | 6          | 595   | 600  | putative ORF-X                         |
| 8    | GA             | 2    | 3          | 8          | 722   | 729  | putative ORF-X                         |
| 9    | C              | 1    | 6          | 6          | 793   | 798  | putative ORF-X                         |
| 10   | GAT            | 3    | 3          | 11         | 818   | 828  | putative ORF-X                         |
| 11   | GA             | 2    | 3          | 6          | 982   | 987  | NCS                                    |
| 12   | GCT            | 3    | 4          | 12         | 1124  | 1135 | putative protein 2                     |
| 13   | AGC            | 3    | 4          | 12         | 1171  | 1182 | putative protein 2                     |
| 14   | CAC            | 3    | 4          | 12         | 1397  | 1408 | putative protein 2                     |
| 15   | A              | 1    | 6          | 6          | 1770  | 1775 | putative protein 2, putative protein 3 |
| 16   | TAC            | 3    | 3          | 9          | 2069  | 2077 | VP1                                    |
| 17   | C              | 1    | 7          | 7          | 2165  | 2171 | VP1                                    |
| 18   | CT             | 2    | 3          | 6          | 2686  | 2691 | VP1                                    |
| 19   | GC             | 2    | 6          | 11         | 3114  | 3124 | NCS                                    |
| 20   | TG             | 2    | 6          | 13         | 4715  | 4727 | LTA                                    |
| 21   | TCC            | 3    | 4          | 12         | 5024  | 5035 | LTA                                    |

#### BM76

| S.No | Consensus Rep. | Size | Iterations | Tract-size | Start | End  | PROTEIN                                                           |
|------|----------------|------|------------|------------|-------|------|-------------------------------------------------------------------|
| 1    | T              | 1    | 6          | 6          | 9     | 14   | NCS                                                               |
| 2    | GC             | 2    | 3          | 6          | 362   | 367  | NCS                                                               |
| 3    | GC             | 2    | 3          | 6          | 443   | 448  | agnoprotein 1a, agnoprotein 1b,<br>agnoprotein 2a, agnoprotein 2b |
| 4    | C              | 1    | 6          | 6          | 589   | 594  | NCS                                                               |
| 5    | GA             | 2    | 3          | 6          | 1312  | 1317 | VP2, VP3                                                          |
| 6    | TA             | 2    | 3          | 6          | 1516  | 1521 | VP2, VP3                                                          |
| 7    | C              | 1    | 7          | 7          | 1785  | 1791 | VP2, VP3                                                          |
| 8    | A              | 1    | 7          | 7          | 2044  | 2050 | VP1                                                               |
| 9    | C              | 1    | 6          | 6          | 2098  | 2103 | VP1                                                               |

|        |   |   |    |      |               |
|--------|---|---|----|------|---------------|
| 10 C   | 1 | 7 | 7  | 2560 | 2566 VP1      |
| 11 GT  | 2 | 3 | 6  | 2866 | 2871 VP1      |
| 12 C   | 1 | 6 | 6  | 2910 | 2915 VP1      |
| 13 TAT | 3 | 4 | 11 | 3019 | 3029 LTA      |
| 14 AAT | 3 | 3 | 10 | 3273 | 3282 LTA      |
| 15 AT  | 2 | 3 | 6  | 3601 | 3606 LTA      |
| 16 AT  | 2 | 3 | 6  | 3646 | 3651 LTA      |
| 17 TA  | 2 | 3 | 6  | 4006 | 4011 LTA      |
| 18 T   | 1 | 6 | 6  | 4220 | 4225 LTA      |
| 19 A   | 1 | 6 | 6  | 4562 | 4567 STA      |
| 20 TC  | 2 | 3 | 6  | 4646 | 4651 STA      |
| 21 CT  | 2 | 3 | 6  | 4755 | 4760 STA, LTA |

### BM77

| S.No   | Consensus Rep. | Size | Iterations | Tract-size | Start | End  | PROTEIN                    |
|--------|----------------|------|------------|------------|-------|------|----------------------------|
| 1 T    |                | 1    | 9          | 9          | 54    | 62   | NCS                        |
| 2 AT   |                | 2    | 3          | 6          | 129   | 134  | NCS                        |
| 3 GC   |                | 2    | 3          | 6          | 221   | 226  | NCS                        |
| 4 C    |                | 1    | 6          | 6          | 389   | 394  | putative ORF-X             |
| 5 GT   |                | 2    | 3          | 6          | 410   | 415  | NCS                        |
| 6 C    |                | 1    | 6          | 6          | 609   | 614  | putative ORF-X             |
| 7 C    |                | 1    | 6          | 6          | 641   | 646  | putative ORF-X             |
| 8 C    |                | 1    | 6          | 6          | 781   | 786  | NCS                        |
| 9 AGC  |                | 3    | 4          | 12         | 967   | 978  | putative VP2               |
| 10 ATT |                | 3    | 3          | 10         | 1278  | 1287 | putative VP2, putative VP3 |
| 11 C   |                | 1    | 6          | 6          | 2027  | 2032 | VP1                        |
| 12 A   |                | 1    | 6          | 6          | 2034  | 2039 | VP1                        |
| 13 AC  |                | 2    | 5          | 10         | 2475  | 2484 | VP1                        |
| 14 CT  |                | 2    | 3          | 6          | 2548  | 2553 | VP1                        |
| 15 AC  |                | 2    | 3          | 6          | 3077  | 3082 | LTA                        |
| 16 T   |                | 1    | 6          | 6          | 3177  | 3182 | LTA                        |
| 17 AGC |                | 3    | 3          | 9          | 3568  | 3576 | LTA                        |
| 18 G   |                | 1    | 6          | 6          | 3632  | 3637 | LTA                        |
| 19 AT  |                | 2    | 3          | 6          | 3703  | 3708 | LTA                        |
| 20 CCT |                | 3    | 4          | 12         | 3946  | 3957 | LTA                        |
| 21 T   |                | 1    | 6          | 6          | 4202  | 4207 | LTA                        |
| 22 AC  |                | 2    | 3          | 6          | 4327  | 4332 | LTA                        |
| 23 TGG |                | 3    | 4          | 12         | 4531  | 4542 | LTA                        |
| 24 T   |                | 1    | 6          | 6          | 4631  | 4636 | STA                        |

### BM78

| S.No     | Consensus Rep. | Size | Iterations | Tract-size | Start | End  | PROTEIN       |
|----------|----------------|------|------------|------------|-------|------|---------------|
| 1 T      |                | 1    | 6          | 6          | 51    | 56   | NCS           |
| 2 AT     |                | 2    | 3          | 6          | 127   | 132  | NCS           |
| 3 GC     |                | 2    | 3          | 6          | 206   | 211  | NCS           |
| 4 CT     |                | 2    | 3          | 6          | 414   | 419  | NCS           |
| 5 C      |                | 1    | 7          | 7          | 614   | 620  | VP4           |
| 6 ACC    |                | 3    | 3          | 9          | 878   | 886  | NCS           |
| 7 AGC    |                | 3    | 4          | 12         | 1230  | 1241 | VP2           |
| 8 AT     |                | 2    | 3          | 6          | 1334  | 1339 | VP2, VP3      |
| 9 TC     |                | 2    | 3          | 6          | 1340  | 1345 | VP2, VP3      |
| 10 GAG   |                | 3    | 4          | 12         | 1628  | 1639 | VP2, VP3      |
| 11 GAG   |                | 3    | 4          | 12         | 1837  | 1848 | VP2, VP3, VP1 |
| 12 TA    |                | 2    | 3          | 6          | 2593  | 2598 | VP1           |
| 13 AGC   |                | 3    | 3          | 9          | 2607  | 2615 | VP1           |
| 14 A     |                | 1    | 8          | 8          | 2971  | 2978 | NCS           |
| 15 CA    |                | 2    | 3          | 6          | 3105  | 3110 | LTA           |
| 16 T     |                | 1    | 6          | 6          | 4194  | 4199 | LTA           |
| 17 T     |                | 1    | 6          | 6          | 4236  | 4241 | LTA           |
| 18 A     |                | 1    | 7          | 7          | 4293  | 4299 | LTA           |
| 19 C     |                | 1    | 6          | 6          | 4306  | 4311 | LTA           |
| 20 AAGC  |                | 4    | 3          | 12         | 4440  | 4451 | LTA           |
| 21 TTGCT |                | 5    | 3          | 14         | 4656  | 4669 | STA           |

### BM79

| S.No | Consensus Rep. | Size | Iterations | Tract-size | Start | End  | PROTEIN       |
|------|----------------|------|------------|------------|-------|------|---------------|
| 1    | TA             | 2    | 3          | 6          | 30    | 35   | NCS           |
| 2    | T              | 1    | 6          | 6          | 36    | 41   | NCS           |
| 3    | AAGG           | 4    | 3          | 11         | 81    | 91   | NCS           |
| 4    | GC             | 2    | 7          | 13         | 203   | 215  | NCS           |
| 5    | AC             | 2    | 3          | 6          | 344   | 349  | ORF-X         |
| 6    | C              | 1    | 7          | 7          | 654   | 660  | ORF-X         |
| 7    | TGC            | 3    | 4          | 12         | 1165  | 1176 | VP2           |
| 8    | CT             | 2    | 3          | 6          | 1365  | 1370 | VP2, VP3      |
| 9    | TA             | 2    | 3          | 6          | 1373  | 1378 | VP2, VP3      |
| 10   | AT             | 2    | 3          | 6          | 1423  | 1428 | VP2, VP3      |
| 11   | TA             | 2    | 3          | 6          | 1550  | 1555 | VP2, VP3      |
| 12   | GAA            | 3    | 4          | 12         | 1667  | 1678 | VP2, VP3      |
| 13   | GGA            | 3    | 4          | 12         | 1905  | 1916 | VP2, VP3, VP1 |
| 14   | ACCT           | 4    | 3          | 11         | 2080  | 2090 | VP1           |
| 15   | CT             | 2    | 3          | 6          | 2602  | 2607 | VP1           |
| 16   | TC             | 2    | 3          | 6          | 2769  | 2774 | VP1           |
| 17   | GT             | 2    | 4          | 8          | 3006  | 3013 | NCS           |
| 18   | GT             | 2    | 3          | 6          | 3028  | 3033 | NCS           |
| 19   | T              | 1    | 6          | 6          | 3182  | 3187 | LTA           |
| 20   | TC             | 2    | 3          | 6          | 3586  | 3591 | LTA           |
| 21   | CAG            | 3    | 3          | 10         | 3621  | 3630 | LTA           |
| 22   | TC             | 2    | 3          | 6          | 3950  | 3955 | LTA           |
| 23   | T              | 1    | 6          | 6          | 4018  | 4023 | LTA           |
| 24   | T              | 1    | 6          | 6          | 4276  | 4281 | LTA           |
| 25   | AC             | 2    | 3          | 6          | 4292  | 4297 | LTA           |
| 26   | T              | 1    | 6          | 6          | 4318  | 4323 | LTA           |
| 27   | C              | 1    | 6          | 6          | 4388  | 4393 | LTA           |
| 28   | TCT            | 3    | 4          | 12         | 4928  | 4939 | LTA, STA      |
| 29   | ATTA           | 4    | 3          | 12         | 5015  | 5026 | LTA, STA      |
| 30   | T              | 1    | 6          | 6          | 5037  | 5042 | LTA, STA      |
| 31   | T              | 1    | 6          | 6          | 5103  | 5108 | LTA, STA      |
| 32   | GCA            | 3    | 4          | 12         | 5127  | 5138 | LTA, STA      |
| 33   | CT             | 2    | 3          | 6          | 5140  | 5145 | LTA, STA      |

#### BM80

| S.No | Consensus Rep. | Size | Iterations | Tract-size | Start | End  | PROTEIN                                  |
|------|----------------|------|------------|------------|-------|------|------------------------------------------|
| 1    | T              | 1    | 6          | 6          | 40    | 45   | NCS                                      |
| 2    | ATA            | 3    | 3          | 9          | 82    | 90   | NCS                                      |
| 3    | AT             | 2    | 3          | 6          | 118   | 123  | NCS                                      |
| 4    | GCT            | 3    | 4          | 12         | 256   | 267  | NCS                                      |
| 5    | CCCA           | 4    | 3          | 12         | 489   | 500  | putative ORF-X                           |
| 6    | GC             | 2    | 3          | 6          | 671   | 676  | putative ORF-X                           |
| 7    | CAG            | 3    | 3          | 9          | 770   | 778  | putative ORF-X                           |
| 8    | GCA            | 3    | 3          | 9          | 1317  | 1325 | putative VP2                             |
| 9    | TA             | 2    | 3          | 6          | 1567  | 1572 | putative VP2, putative VP3               |
| 10   | GCAA           | 4    | 3          | 12         | 1929  | 1940 | putative VP2, putative VP3               |
| 11   | A              | 1    | 6          | 6          | 2084  | 2089 | putative VP2, putative VP3, putative VP1 |
| 12   | A              | 1    | 6          | 6          | 2098  | 2103 | putative VP2, putative VP3, putative VP1 |
| 13   | GT             | 2    | 3          | 6          | 3068  | 3073 | putative VP1                             |
| 14   | TAA            | 3    | 3          | 10         | 3213  | 3222 | NCS                                      |
| 15   | TC             | 2    | 3          | 6          | 3767  | 3772 | LTA                                      |
| 16   | T              | 1    | 7          | 7          | 3877  | 3883 | LTA                                      |
| 17   | G              | 1    | 6          | 6          | 4742  | 4747 | LTA                                      |
| 18   | CG             | 2    | 3          | 6          | 4946  | 4951 | STA                                      |

#### BM81

| S.No | Consensus Rep. | Size | Iterations | Tract-size | Start | End  | PROTEIN  |
|------|----------------|------|------------|------------|-------|------|----------|
| 1    | T              | 1    | 7          | 7          | 26    | 32   | NCS      |
| 2    | AT             | 2    | 3          | 6          | 248   | 253  | NCS      |
| 3    | C              | 1    | 6          | 6          | 417   | 422  | NCS      |
| 4    | G              | 1    | 8          | 8          | 558   | 565  | VP2      |
| 5    | C              | 1    | 6          | 6          | 1341  | 1346 | VP2, VP3 |
| 6    | CT             | 2    | 3          | 6          | 2160  | 2165 | VP1      |
| 7    | A              | 1    | 6          | 6          | 2472  | 2477 | VP1      |
| 8    | C              | 1    | 6          | 6          | 2498  | 2503 | VP1      |
| 9    | GA             | 2    | 3          | 6          | 2504  | 2509 | VP1      |
| 10   | TTC            | 3    | 5          | 15         | 2850  | 2864 | LTA      |
| 11   | CA             | 2    | 4          | 8          | 2866  | 2873 | LTA      |
| 12   | GAG            | 3    | 4          | 12         | 2997  | 3008 | LTA      |
| 13   | AT             | 2    | 3          | 6          | 3126  | 3131 | LTA      |
| 14   | G              | 1    | 6          | 6          | 3172  | 3177 | LTA      |
| 15   | ATC            | 3    | 5          | 15         | 3588  | 3602 | LTA      |

|        |   |   |    |      |               |
|--------|---|---|----|------|---------------|
| 16 TA  | 2 | 3 | 6  | 3892 | 3897 LTA      |
| 17 C   | 1 | 6 | 6  | 4073 | 4078 LTA      |
| 18 CTG | 3 | 4 | 12 | 4215 | 4226 LTA      |
| 19 CTG | 3 | 3 | 9  | 4686 | 4694 LTA, STA |
| 20 AG  | 2 | 3 | 6  | 4758 | 4763 LTA, STA |

### BM82

| S.No   | Consensus Rep. | Size | Iterations | Tract-size | Start | End  | PROTEIN                         |
|--------|----------------|------|------------|------------|-------|------|---------------------------------|
| 1 T    |                | 1    | 6          | 6          | 40    | 45   | NCS                             |
| 2 ATA  |                | 3    | 3          | 9          | 82    | 90   | NCS                             |
| 3 AT   |                | 2    | 3          | 6          | 118   | 123  | NCS                             |
| 4 CCCA |                | 4    | 3          | 12         | 480   | 491  | putative ORF-X                  |
| 5 GC   |                | 2    | 4          | 8          | 660   | 667  | putative ORF-X                  |
| 6 GCA  |                | 3    | 3          | 9          | 1308  | 1316 | putative VP2                    |
| 7 CT   |                | 2    | 3          | 6          | 1684  | 1689 | putative VP2, putative VP3      |
| 8 GA   |                | 2    | 3          | 6          | 1775  | 1780 | putative VP2, putative VP3      |
| 9 A    |                | 1    | 6          | 6          | 2092  | 2097 | putative VP2, putative VP3, VP1 |
| 10 C   |                | 1    | 6          | 6          | 2285  | 2290 | VP1                             |
| 11 CCA |                | 3    | 3          | 12         | 2780  | 2791 | VP1                             |
| 12 AG  |                | 2    | 3          | 6          | 2942  | 2947 | VP1                             |
| 13 GT  |                | 2    | 3          | 6          | 3062  | 3067 | VP1                             |
| 14 TAA |                | 3    | 3          | 10         | 3207  | 3216 | NCS                             |
| 15 G   |                | 1    | 6          | 6          | 3558  | 3563 | LTA                             |
| 16 CT  |                | 2    | 3          | 6          | 3594  | 3599 | LTA                             |
| 17 AT  |                | 2    | 3          | 6          | 3723  | 3728 | LTA                             |
| 18 TC  |                | 2    | 3          | 6          | 3761  | 3766 | LTA                             |
| 19 G   |                | 1    | 6          | 6          | 4736  | 4741 | LTA                             |
| 20 A   |                | 1    | 6          | 6          | 4895  | 4900 | STA                             |
| 21 CG  |                | 2    | 3          | 6          | 4940  | 4945 | STA                             |

### BM83

| S.No     | Consensus Rep. | Size | Iterations | Tract-size | Start | End  | PROTEIN  |
|----------|----------------|------|------------|------------|-------|------|----------|
| 1 T      |                | 1    | 7          | 7          | 40    | 46   | NCS      |
| 2 CA     |                | 2    | 3          | 6          | 74    | 79   | NCS      |
| 3 TG     |                | 2    | 4          | 10         | 147   | 156  | NCS      |
| 4 AAG    |                | 3    | 3          | 10         | 934   | 943  | NCS      |
| 5 C      |                | 1    | 8          | 8          | 1028  | 1035 | NCS      |
| 6 CT     |                | 2    | 3          | 6          | 1552  | 1557 | VP2, VP3 |
| 7 AC     |                | 2    | 3          | 6          | 1668  | 1673 | VP2, VP3 |
| 8 CAGA   |                | 4    | 3          | 11         | 1845  | 1855 | VP2, VP3 |
| 9 A      |                | 1    | 6          | 6          | 2244  | 2249 | VP1      |
| 10 G     |                | 1    | 6          | 6          | 2393  | 2398 | VP1      |
| 11 GT    |                | 2    | 3          | 6          | 2623  | 2628 | VP1      |
| 12 AT    |                | 2    | 3          | 6          | 2815  | 2820 | VP1      |
| 13 AC    |                | 2    | 3          | 6          | 2938  | 2943 | VP1      |
| 14 C     |                | 1    | 8          | 8          | 3123  | 3130 | NCS      |
| 15 C     |                | 1    | 6          | 6          | 3141  | 3146 | NCS      |
| 16 GC    |                | 2    | 4          | 8          | 3261  | 3268 | NCS      |
| 17 AAAGC |                | 5    | 3          | 15         | 3830  | 3844 | LTA      |
| 18 C     |                | 1    | 6          | 6          | 3910  | 3915 | LTA      |
| 19 G     |                | 1    | 6          | 6          | 3994  | 3999 | LTA      |
| 20 TTC   |                | 3    | 3          | 9          | 4549  | 4557 | LTA      |
| 21 T     |                | 1    | 7          | 7          | 4593  | 4599 | LTA      |
| 22 GA    |                | 2    | 3          | 6          | 4725  | 4730 | LTA      |
| 23 T     |                | 1    | 6          | 6          | 4736  | 4741 | LTA      |
| 24 G     |                | 1    | 7          | 7          | 4879  | 4885 | LTA      |
| 25 C     |                | 1    | 6          | 6          | 4953  | 4958 | STA      |
| 26 AT    |                | 2    | 3          | 6          | 5075  | 5080 | STA      |
| 27 AT    |                | 2    | 3          | 6          | 5087  | 5092 | STA      |
| 28 TCC   |                | 3    | 4          | 12         | 5183  | 5194 | LTA, STA |
| 29 C     |                | 1    | 7          | 7          | 5239  | 5245 | LTA, STA |

### BM84

| S.No   | Consensus Rep. | Size | Iterations | Tract-size | Start | End  | PROTEIN  |
|--------|----------------|------|------------|------------|-------|------|----------|
| 1 GC   |                | 2    | 3          | 6          | 15    | 20   | NCS      |
| 2 TA   |                | 2    | 3          | 6          | 82    | 87   | NCS      |
| 3 A    |                | 1    | 8          | 8          | 89    | 96   | NCS      |
| 4 TC   |                | 2    | 3          | 6          | 128   | 133  | NCS      |
| 5 TC   |                | 2    | 3          | 6          | 141   | 146  | NCS      |
| 6 AT   |                | 2    | 3          | 6          | 1012  | 1017 | VP2, VP3 |
| 7 T    |                | 1    | 6          | 6          | 1017  | 1022 | VP2, VP3 |
| 8 CATA |                | 4    | 3          | 11         | 1190  | 1200 | VP2, VP3 |

|        |   |   |    |      |                    |
|--------|---|---|----|------|--------------------|
| 9 C    | 1 | 6 | 6  | 1292 | 1297 VP2, VP3      |
| 10 AG  | 2 | 3 | 6  | 1317 | 1322 VP2, VP3      |
| 11 C   | 1 | 7 | 7  | 1566 | 1572 VP2, VP3, VP1 |
| 12 A   | 1 | 6 | 6  | 1573 | 1578 VP2, VP3, VP1 |
| 13 TAA | 3 | 4 | 11 | 1613 | 1623 VP2, VP3, VP1 |
| 14 G   | 1 | 6 | 6  | 1624 | 1629 VP2, VP3, VP1 |
| 15 GT  | 2 | 3 | 6  | 2159 | 2164 VP1           |
| 16 TA  | 2 | 3 | 6  | 2333 | 2338 VP1           |
| 17 CAG | 3 | 3 | 11 | 2340 | 2350 VP1           |
| 18 T   | 1 | 6 | 6  | 2706 | 2711 LTA           |
| 19 TC  | 2 | 3 | 6  | 2771 | 2776 LTA           |
| 20 T   | 1 | 7 | 7  | 2878 | 2884 LTA           |
| 21 TA  | 2 | 3 | 6  | 2914 | 2919 LTA           |
| 22 CA  | 2 | 3 | 6  | 3247 | 3252 LTA           |
| 23 C   | 1 | 6 | 6  | 3436 | 3441 LTA           |
| 24 TCT | 3 | 3 | 12 | 3783 | 3794 LTA           |
| 25 A   | 1 | 7 | 7  | 3806 | 3812 LTA           |
| 26 T   | 1 | 6 | 6  | 3926 | 3931 LTA           |
| 27 AT  | 2 | 3 | 6  | 4008 | 4013 LTA           |
| 28 TA  | 2 | 3 | 6  | 4370 | 4375 STA           |
| 29 T   | 1 | 6 | 6  | 4382 | 4387 STA           |
| 30 TA  | 2 | 3 | 6  | 4393 | 4398 STA           |
| 31 AT  | 2 | 3 | 6  | 4564 | 4569 NCS           |

### BM85

| S.No      | Consensus Rep. | Size | Iterations | Tract-size | Start | End  | PROTEIN   |
|-----------|----------------|------|------------|------------|-------|------|-----------|
| 1 T       |                | 1    | 6          | 6          | 146   | 151  | NCS       |
| 2 A       |                | 1    | 7          | 7          | 176   | 182  | NCS       |
| 3 G       |                | 1    | 8          | 8          | 251   | 258  | NCS       |
| 4 T       |                | 1    | 12         | 12         | 343   | 354  | NCS       |
| 5 A       |                | 1    | 24         | 24         | 641   | 664  | NCS       |
| 6 C       |                | 1    | 6          | 6          | 766   | 771  | NCS       |
| 7 T       |                | 1    | 29         | 29         | 777   | 805  | NCS       |
| 8 T       |                | 1    | 11         | 11         | 917   | 927  | NCS       |
| 9 A       |                | 1    | 6          | 6          | 1007  | 1012 | NCS       |
| 10 T      |                | 1    | 6          | 6          | 1017  | 1022 | NCS       |
| 11 T      |                | 1    | 8          | 8          | 1081  | 1088 | NCS       |
| 12 A      |                | 1    | 6          | 6          | 1160  | 1165 | NCS       |
| 13 T      |                | 1    | 12         | 12         | 1206  | 1217 | NCS       |
| 14 A      |                | 1    | 6          | 6          | 1539  | 1544 | sVP1      |
| 15 TA     |                | 2    | 3          | 6          | 1583  | 1588 | sVP1      |
| 16 C      |                | 1    | 6          | 6          | 1596  | 1601 | sVP1      |
| 17 GGC    |                | 3    | 4          | 12         | 1690  | 1701 | Svp1, VP2 |
| 18 GGGGAG |                | 6    | 3          | 19         | 1817  | 1835 | VP2       |
| 19 G      |                | 1    | 6          | 6          | 2068  | 2073 | VP2       |
| 20 AG     |                | 2    | 3          | 6          | 2227  | 2232 | VP2       |
| 21 CAA    |                | 3    | 4          | 12         | 2276  | 2287 | VP2       |
| 22 A      |                | 1    | 6          | 6          | 2343  | 2348 | VP2       |
| 23 AG     |                | 2    | 3          | 6          | 2519  | 2524 | VP2       |
| 24 AG     |                | 2    | 3          | 6          | 2530  | 2535 | VP2       |
| 25 GAA    |                | 3    | 5          | 14         | 2633  | 2646 | VP2       |
| 26 GA     |                | 2    | 3          | 6          | 2799  | 2804 | VP2       |
| 27 AG     |                | 2    | 3          | 6          | 3065  | 3070 | VP2       |
| 28 TC     |                | 2    | 3          | 6          | 3220  | 3225 | VP2       |
| 29 C      |                | 1    | 7          | 7          | 3266  | 3272 | VP2       |
| 30 A      |                | 1    | 6          | 6          | 3358  | 3363 | VP2, VP1  |
| 31 G      |                | 1    | 6          | 6          | 3378  | 3383 | VP2, VP1  |
| 32 A      |                | 1    | 6          | 6          | 3517  | 3522 | VP1, sVP1 |
| 33 C      |                | 1    | 6          | 6          | 3981  | 3986 | VP1, sVP1 |
| 34 C      |                | 1    | 6          | 6          | 4301  | 4306 | VP1, sVP1 |
| 35 A      |                | 1    | 6          | 6          | 4416  | 4421 | VP1, sVP1 |
| 36 A      |                | 1    | 11         | 11         | 4541  | 4551 | NCS       |
| 37 AT     |                | 2    | 4          | 8          | 4737  | 4744 | NCS       |
| 38 AT     |                | 2    | 8          | 15         | 4774  | 4788 | NCS       |
| 39 A      |                | 1    | 7          | 7          | 4866  | 4872 | NCS       |
| 40 A      |                | 1    | 6          | 6          | 4919  | 4924 | NCS       |
| 41 T      |                | 1    | 7          | 7          | 4963  | 4969 | NCS       |
| 42 TCC    |                | 3    | 9          | 27         | 5256  | 5282 | sLT, LTA  |
| 43 G      |                | 1    | 8          | 8          | 5466  | 5473 | sLT, LTA  |
| 44 A      |                | 1    | 6          | 6          | 5482  | 5487 | sLT, LTA  |
| 45 G      |                | 1    | 6          | 6          | 5985  | 5990 | sLT, LTA  |
| 46 CT     |                | 2    | 3          | 6          | 6021  | 6026 | sLT, LTA  |
| 47 GCA    |                | 3    | 3          | 10         | 6390  | 6399 | sLT, LTA  |
| 48 TC     |                | 2    | 3          | 6          | 6481  | 6486 | sLT, LTA  |

|         |   |   |    |      |               |
|---------|---|---|----|------|---------------|
| 49 CA   | 2 | 3 | 6  | 6524 | 6529 sLT, LTA |
| 50 T    | 1 | 6 | 6  | 6536 | 6541 sLT, LTA |
| 51 G    | 1 | 6 | 6  | 6759 | 6764 sLT, LTA |
| 52 C    | 1 | 7 | 7  | 6913 | 6919 sLT, LTA |
| 53 GTCC | 4 | 3 | 11 | 6992 | 7002 sLT, LTA |
| 54 CA   | 2 | 3 | 6  | 7048 | 7053 sLT, LTA |
| 55 AATG | 4 | 3 | 12 | 7058 | 7069 sLT, LTA |
| 56 TC   | 2 | 3 | 6  | 7287 | 7292 sLT, LTA |

### BM86

| S.No    | Consensus Rep. | Size | Iterations | Tract-size | Start | End  | PROTEIN  |
|---------|----------------|------|------------|------------|-------|------|----------|
| 1 A     |                | 1    | 7          | 7          | 47    | 53   | NCS      |
| 2 TA    |                | 2    | 4          | 8          | 55    | 62   | NCS      |
| 3 AC    |                | 2    | 3          | 6          | 176   | 181  | NCS      |
| 4 T     |                | 1    | 6          | 6          | 399   | 404  | NCS      |
| 5 AGC   |                | 3    | 3          | 9          | 722   | 730  | VP2      |
| 6 AG    |                | 2    | 3          | 6          | 871   | 876  | NCS      |
| 7 TGT   |                | 3    | 4          | 12         | 2169  | 2180 | VP1      |
| 8 AT    |                | 2    | 3          | 6          | 2791  | 2796 | NCS      |
| 9 TG    |                | 2    | 3          | 6          | 2860  | 2865 | LTA      |
| 10 AT   |                | 2    | 3          | 6          | 2923  | 2928 | LTA      |
| 11 AC   |                | 2    | 4          | 8          | 2971  | 2978 | LTA      |
| 12 AT   |                | 2    | 3          | 6          | 3054  | 3059 | LTA      |
| 13 CTT  |                | 3    | 3          | 9          | 3130  | 3138 | LTA      |
| 14 TTA  |                | 3    | 4          | 12         | 3202  | 3213 | LTA      |
| 15 T    |                | 1    | 7          | 7          | 3245  | 3251 | LTA      |
| 16 TA   |                | 2    | 3          | 6          | 3282  | 3287 | LTA      |
| 17 CA   |                | 2    | 3          | 6          | 3470  | 3475 | LTA      |
| 18 AATT |                | 4    | 3          | 11         | 3476  | 3486 | LTA      |
| 19 T    |                | 1    | 7          | 7          | 3677  | 3683 | LTA      |
| 20 C    |                | 1    | 6          | 6          | 4118  | 4123 | LTA      |
| 21 CTT  |                | 3    | 4          | 11         | 4399  | 4409 | LTA      |
| 22 T    |                | 1    | 8          | 8          | 4408  | 4415 | LTA      |
| 23 A    |                | 1    | 6          | 6          | 4701  | 4706 | STA      |
| 24 T    |                | 1    | 7          | 7          | 4762  | 4768 | STA      |
| 25 TCA  |                | 3    | 3          | 9          | 4890  | 4898 | STA      |
| 26 T    |                | 1    | 6          | 6          | 5139  | 5144 | LTA, STA |
| 27 CT   |                | 2    | 3          | 6          | 5145  | 5150 | LTA, STA |

### BM87

| S.No   | Consensus Rep. | Size | Iterations | Tract-size | Start | End  | PROTEIN |
|--------|----------------|------|------------|------------|-------|------|---------|
| 1 CCT  |                | 3    | 3          | 10         | 10    | 19   | NCS     |
| 2 GC   |                | 2    | 3          | 6          | 40    | 45   | NCS     |
| 3 AT   |                | 2    | 3          | 6          | 55    | 60   | NCS     |
| 4 A    |                | 1    | 6          | 6          | 63    | 68   | NCS     |
| 5 CTTA |                | 4    | 3          | 12         | 760   | 771  | VP2     |
| 6 A    |                | 1    | 7          | 7          | 897   | 903  | VP2     |
| 7 GAA  |                | 3    | 4          | 13         | 939   | 951  | VP2     |
| 8 TA   |                | 2    | 5          | 10         | 1354  | 1363 | VP1     |
| 9 A    |                | 1    | 6          | 6          | 1455  | 1460 | VP1     |
| 10 TC  |                | 2    | 3          | 6          | 2010  | 2015 | STA     |
| 11 ATC |                | 3    | 3          | 9          | 2084  | 2092 | STA     |
| 12 AT  |                | 2    | 3          | 6          | 2261  | 2266 | LTA     |
| 13 AC  |                | 2    | 3          | 6          | 2351  | 2356 | LTA     |
| 14 T   |                | 1    | 8          | 8          | 2413  | 2420 | LTA     |
| 15 T   |                | 1    | 6          | 6          | 2440  | 2445 | LTA     |
| 16 TC  |                | 2    | 3          | 6          | 2596  | 2601 | LTA     |
| 17 TTG |                | 3    | 4          | 11         | 2792  | 2802 | LTA     |
| 18 TA  |                | 2    | 3          | 6          | 3130  | 3135 | LTA     |
| 19 GAA |                | 3    | 3          | 9          | 3700  | 3708 | LTA     |
| 20 CAT |                | 3    | 6          | 18         | 3716  | 3733 | LTA     |
| 21 T   |                | 1    | 6          | 6          | 3850  | 3855 | LTA     |

### BM88

| S.No | Consensus Rep. | Size | Iterations | Tract-size | Start | End | PROTEIN |
|------|----------------|------|------------|------------|-------|-----|---------|
| 1 TA |                | 2    | 3          | 6          | 45    | 50  | NCS     |
| 2 A  |                | 1    | 6          | 6          | 97    | 102 | NCS     |
| 3 T  |                | 1    | 10         | 10         | 280   | 289 | NCS     |
| 4 T  |                | 1    | 12         | 12         | 325   | 336 | NCS     |
| 5 T  |                | 1    | 14         | 14         | 350   | 363 | NCS     |
| 6 T  |                | 1    | 12         | 12         | 399   | 410 | NCS     |
| 7 T  |                | 1    | 7          | 7          | 561   | 567 | NCS     |

|           |   |    |    |      |                            |
|-----------|---|----|----|------|----------------------------|
| 8 T       | 1 | 10 | 10 | 581  | 590 NCS                    |
| 9 T       | 1 | 10 | 10 | 604  | 613 NCS                    |
| 10 T      | 1 | 11 | 11 | 628  | 638 NCS                    |
| 11 TC     | 2 | 3  | 6  | 730  | 735 NCS                    |
| 12 T      | 1 | 6  | 6  | 778  | 783 NCS                    |
| 13 ATGT   | 4 | 3  | 11 | 825  | 835 Cys-pro leader peptide |
| 14 TGC    | 3 | 4  | 12 | 1205 | 1216 VP2                   |
| 15 TGT    | 3 | 3  | 9  | 1660 | 1668 VP2                   |
| 16 AG     | 2 | 3  | 6  | 1838 | 1843 VP2                   |
| 17 CA     | 2 | 3  | 6  | 1906 | 1911 VP2                   |
| 18 A      | 1 | 6  | 6  | 1956 | 1961 VP2                   |
| 19 AG     | 2 | 6  | 11 | 2002 | 2012 VP2                   |
| 20 A      | 1 | 6  | 6  | 2268 | 2273 VP2                   |
| 21 GTT    | 3 | 3  | 10 | 2414 | 2423 VP2                   |
| 22 T      | 1 | 6  | 6  | 3642 | 3647 NCS                   |
| 23 A      | 1 | 6  | 6  | 3663 | 3668 NCS                   |
| 24 A      | 1 | 6  | 6  | 3692 | 3697 NCS                   |
| 25 A      | 1 | 17 | 17 | 3813 | 3829 NCS                   |
| 26 T      | 1 | 9  | 9  | 3851 | 3859 NCS                   |
| 27 T      | 1 | 10 | 10 | 3863 | 3872 NCS                   |
| 28 T      | 1 | 9  | 9  | 4084 | 4092 LTA                   |
| 29 CCT    | 3 | 4  | 12 | 4209 | 4220 LTA                   |
| 30 GC     | 2 | 3  | 6  | 4352 | 4357 LTA                   |
| 31 ATCGAA | 6 | 3  | 19 | 4614 | 4632 LTA                   |
| 32 CT     | 2 | 3  | 6  | 4689 | 4694 LTA                   |
| 33 TG     | 2 | 3  | 6  | 4754 | 4759 LTA                   |
| 34 TC     | 2 | 3  | 6  | 5377 | 5382 LTA                   |
| 35 AG     | 2 | 3  | 6  | 5445 | 5450 LTA                   |
| 36 GC     | 2 | 3  | 6  | 5479 | 5484 LTA                   |
| 37 TG     | 2 | 3  | 6  | 5722 | 5727 LTA                   |
| 38 TCAG   | 4 | 3  | 13 | 5849 | 5861 LTA                   |
| 39 TC     | 2 | 3  | 6  | 5966 | 5971 LTA                   |

#### BM89

| S.No | Consensus Rep. | Size | Iterations | Tract-size | Start | End  | Protein  |
|------|----------------|------|------------|------------|-------|------|----------|
| 1    | CAGTG          | 5    | 3          | 15         | 11    | 25   | NCS      |
| 2    | A              | 1    | 6          | 6          | 53    | 58   | NCS      |
| 3    | T              | 1    | 7          | 7          | 80    | 86   | NCS      |
| 4    | A              | 1    | 10         | 10         | 129   | 138  | NCS      |
| 5    | TG             | 2    | 3          | 6          | 196   | 201  | NCS      |
| 6    | AAC            | 3    | 3          | 9          | 378   | 386  | NCS      |
| 7    | T              | 1    | 13         | 13         | 401   | 413  | NCS      |
| 8    | A              | 1    | 13         | 13         | 418   | 430  | NCS      |
| 9    | T              | 1    | 15         | 15         | 491   | 505  | NCS      |
| 10   | TGC            | 3    | 4          | 11         | 783   | 793  | VP2      |
| 11   | ACT            | 3    | 3          | 10         | 957   | 966  | VP2, VP3 |
| 12   | C              | 1    | 6          | 6          | 1153  | 1158 | VP2, VP3 |
| 13   | GA             | 2    | 3          | 6          | 1225  | 1230 | VP2, VP3 |
| 14   | A              | 1    | 7          | 7          | 1429  | 1435 | VP2, VP3 |
| 15   | T              | 1    | 6          | 6          | 1450  | 1455 | VP2      |
| 16   | AATT           | 4    | 3          | 11         | 1530  | 1540 | VP1      |
| 17   | C              | 1    | 6          | 6          | 1699  | 1704 | VP1      |
| 18   | C              | 1    | 7          | 7          | 2157  | 2163 | VP1      |
| 19   | TC             | 2    | 3          | 6          | 2248  | 2253 | VP1      |
| 20   | GA             | 2    | 3          | 6          | 2510  | 2515 | VP1      |
| 21   | T              | 1    | 8          | 8          | 2671  | 2678 | LTA      |
| 22   | G              | 1    | 6          | 6          | 2869  | 2874 | LTA      |
| 23   | T              | 1    | 7          | 7          | 2922  | 2928 | LTA      |
| 24   | T              | 1    | 6          | 6          | 2938  | 2943 | LTA      |
| 25   | T              | 1    | 7          | 7          | 3216  | 3222 | LTA      |
| 26   | TCA            | 3    | 3          | 10         | 3233  | 3242 | LTA      |
| 27   | T              | 1    | 7          | 7          | 4066  | 4072 | LTA      |
| 28   | G              | 1    | 7          | 7          | 4187  | 4193 | LTA      |
| 29   | G              | 1    | 8          | 8          | 4229  | 4236 | LTA      |
| 30   | TCC            | 3    | 4          | 12         | 4252  | 4263 | LTA      |
| 31   | TAAAT          | 5    | 4          | 20         | 4483  | 4502 | LTA      |
| 32   | AT             | 2    | 3          | 6          | 4821  | 4826 | LTA, STA |
| 33   | CT             | 2    | 3          | 6          | 4879  | 4884 | LTA, STA |
| 34   | TC             | 2    | 3          | 6          | 5062  | 5067 | LTA, STA |

#### BM90

| S.No | Consensus Rep. | Size | Iterations | Tract-size | Start | End | Protein |
|------|----------------|------|------------|------------|-------|-----|---------|
| 1    | A              | 1    | 6          | 6          | 32    | 37  | NCS     |

|        |   |    |    |      |               |
|--------|---|----|----|------|---------------|
| 2 T    | 1 | 7  | 7  | 59   | 65 NCS        |
| 3 A    | 1 | 11 | 11 | 108  | 118 NCS       |
| 4 AAC  | 3 | 4  | 12 | 379  | 390 NCS       |
| 5 T    | 1 | 10 | 10 | 404  | 413 NCS       |
| 6 A    | 1 | 9  | 9  | 418  | 426 NCS       |
| 7 GAA  | 3 | 4  | 12 | 427  | 438 NCS       |
| 8 T    | 1 | 15 | 15 | 495  | 509 NCS       |
| 9 TGC  | 3 | 4  | 11 | 787  | 797 VP2       |
| 10 CT  | 2 | 3  | 6  | 952  | 957 VP2, VP3  |
| 11 TC  | 2 | 3  | 6  | 994  | 999 VP2, VP3  |
| 12 AGA | 3 | 4  | 12 | 1004 | 1015 VP2, VP3 |
| 13 C   | 1 | 6  | 6  | 1151 | 1156 VP2, VP3 |
| 14 A   | 1 | 7  | 7  | 1421 | 1427 VP2, VP3 |
| 15 T   | 1 | 6  | 6  | 1442 | 1447 NCS      |
| 16 C   | 1 | 6  | 6  | 1692 | 1697 VP1      |
| 17 ATG | 3 | 4  | 11 | 1750 | 1760 VP1      |
| 18 C   | 1 | 7  | 7  | 2149 | 2155 VP1      |
| 19 A   | 1 | 6  | 6  | 2348 | 2353 VP1      |
| 20 T   | 1 | 7  | 7  | 2664 | 2670 LTA      |
| 21 AG  | 2 | 3  | 6  | 2798 | 2803 LTA      |
| 22 TAA | 3 | 3  | 10 | 2867 | 2876 LTA      |
| 23 T   | 1 | 6  | 6  | 2930 | 2935 LTA      |
| 24 T   | 1 | 7  | 7  | 3208 | 3214 LTA      |
| 25 TC  | 2 | 3  | 6  | 3362 | 3367 LTA      |
| 26 CT  | 2 | 3  | 6  | 3380 | 3385 LTA      |
| 27 T   | 1 | 7  | 7  | 4058 | 4064 LTA      |
| 28 G   | 1 | 7  | 7  | 4179 | 4185 LTA      |
| 29 G   | 1 | 8  | 8  | 4221 | 4228 LTA      |
| 30 TCC | 3 | 4  | 12 | 4244 | 4255 LTA      |
| 31 CT  | 2 | 3  | 6  | 4878 | 4883 LTA, STA |
| 32 TC  | 2 | 3  | 6  | 5061 | 5066 LTA, STA |

#### BM91

| S.No    | Consensus Rep. | Size | Iterations | Tract-size | Start         | End | Protein |
|---------|----------------|------|------------|------------|---------------|-----|---------|
| 1 TG    | 2              | 5    | 10         | 32         | 41 NCS        |     |         |
| 2 T     | 1              | 7    | 7          | 71         | 77 NCS        |     |         |
| 3 A     | 1              | 10   | 10         | 120        | 129 NCS       |     |         |
| 4 T     | 1              | 6    | 6          | 412        | 417 NCS       |     |         |
| 5 A     | 1              | 13   | 13         | 426        | 438 NCS       |     |         |
| 6 T     | 1              | 13   | 13         | 504        | 516 NCS       |     |         |
| 7 TGC   | 3              | 4    | 11         | 794        | 804 VP2       |     |         |
| 8 G     | 1              | 6    | 6          | 1041       | 1046 VP2, VP3 |     |         |
| 9 A     | 1              | 7    | 7          | 1434       | 1440 VP2, VP3 |     |         |
| 10 T    | 1              | 6    | 6          | 1455       | 1460 NCS      |     |         |
| 11 AATT | 4              | 3    | 11         | 1536       | 1546 VP1      |     |         |
| 12 G    | 1              | 6    | 6          | 1549       | 1554 VP1      |     |         |
| 13 GA   | 2              | 3    | 6          | 2516       | 2521 VP1      |     |         |
| 14 T    | 1              | 7    | 7          | 2672       | 2678 LTA      |     |         |
| 15 G    | 1              | 6    | 6          | 2869       | 2874 LTA      |     |         |
| 16 TAA  | 3              | 3    | 10         | 2875       | 2884 LTA      |     |         |
| 17 TGC  | 3              | 3    | 9          | 3160       | 3168 LTA      |     |         |
| 18 AT   | 2              | 3    | 6          | 3207       | 3212 LTA      |     |         |
| 19 CT   | 2              | 3    | 6          | 3388       | 3393 LTA      |     |         |
| 20 AATA | 4              | 3    | 12         | 3853       | 3864 LTA      |     |         |
| 21 TA   | 2              | 3    | 6          | 3933       | 3938 LTA      |     |         |
| 22 T    | 1              | 7    | 7          | 4066       | 4072 LTA      |     |         |
| 23 TC   | 2              | 4    | 8          | 4115       | 4122 LTA      |     |         |
| 24 G    | 1              | 6    | 6          | 4244       | 4249 LTA      |     |         |
| 25 TC   | 2              | 3    | 6          | 4337       | 4342 LTA      |     |         |
| 26 GGA  | 3              | 4    | 12         | 4366       | 4377 LTA      |     |         |
| 27 AGA  | 3              | 4    | 12         | 4416       | 4427 LTA      |     |         |
| 28 CA   | 2              | 3    | 6          | 4869       | 4874 STA      |     |         |
| 29 CT   | 2              | 3    | 6          | 4884       | 4889 STA, LTA |     |         |

#### BM92

| S.No  | Consensus Rep. | Size | Iterations | Tract-size | Start    | End | Protein |
|-------|----------------|------|------------|------------|----------|-----|---------|
| 1 CCT | 3              | 3    | 10         | 69         | 78 NCS   |     |         |
| 2 GC  | 2              | 3    | 6          | 246        | 251 NCS  |     |         |
| 3 GC  | 2              | 4    | 8          | 267        | 274 NCS  |     |         |
| 4 A   | 1              | 9    | 9          | 325        | 333 NCS  |     |         |
| 5 GT  | 2              | 3    | 6          | 1226       | 1231 VP1 |     |         |
| 6 G   | 1              | 7    | 7          | 1281       | 1287 VP1 |     |         |
| 7 CTC | 3              | 4    | 12         | 1736       | 1747 VP1 |     |         |

|         |   |   |    |      |      |          |
|---------|---|---|----|------|------|----------|
| 8 A     | 1 | 6 | 6  | 2323 | 2328 | VP1      |
| 9 C     | 1 | 7 | 7  | 2332 | 2338 | VP1      |
| 10 AAT  | 3 | 3 | 10 | 2343 | 2352 | NCS      |
| 11 ATC  | 3 | 4 | 12 | 2538 | 2549 | LTA      |
| 12 T    | 1 | 6 | 6  | 2988 | 2993 | LTA      |
| 13 TGC  | 3 | 3 | 9  | 3126 | 3134 | LTA      |
| 14 A    | 1 | 6 | 6  | 3333 | 3338 | LTA      |
| 15 T    | 1 | 6 | 6  | 3425 | 3430 | LTA      |
| 16 AGG  | 3 | 3 | 9  | 3901 | 3909 | LTA      |
| 17 AGAA | 4 | 3 | 13 | 3984 | 3996 | LTA      |
| 18 G    | 1 | 6 | 6  | 4221 | 4226 | LTA      |
| 19 TGA  | 3 | 4 | 12 | 4317 | 4328 | LTA      |
| 20 A    | 1 | 6 | 6  | 4501 | 4506 | STA      |
| 21 GCAA | 4 | 3 | 11 | 4611 | 4621 | STA      |
| 22 CAT  | 3 | 3 | 9  | 4897 | 4905 | STA, LTA |
| 23 T    | 1 | 6 | 6  | 4940 | 4945 | STA, LTA |
| 24 CT   | 2 | 3 | 6  | 4950 | 4955 | STA, LTA |
| 25 T    | 1 | 7 | 7  | 5027 | 5033 | STA, LTA |
| 26 T    | 1 | 6 | 6  | 5035 | 5040 | STA, LTA |

### BM93

| S.No     | Consensus Rep. | Size | Iterations | Tract-size | Start | End      | Protein |
|----------|----------------|------|------------|------------|-------|----------|---------|
| 1 CCT    | 3              | 3    | 10         | 55         | 64    | NCS      |         |
| 2 T      | 1              | 7    | 7          | 64         | 70    | NCS      |         |
| 3 A      | 1              | 9    | 9          | 114        | 122   | NCS      |         |
| 4 ATG    | 3              | 4    | 12         | 1277       | 1288  | VP1      |         |
| 5 CTG    | 3              | 4    | 11         | 1473       | 1483  | VP1      |         |
| 6 G      | 1              | 6    | 6          | 1779       | 1784  | VP1      |         |
| 7 AT     | 2              | 3    | 6          | 2148       | 2153  | VP1      |         |
| 8 GA     | 2              | 3    | 6          | 2372       | 2377  | LTA      |         |
| 9 G      | 1              | 6    | 6          | 2579       | 2584  | LTA      |         |
| 10 TC    | 2              | 3    | 6          | 2652       | 2657  | LTA      |         |
| 11 TAA   | 3              | 4    | 12         | 3077       | 3088  | LTA      |         |
| 12 AAT   | 3              | 3    | 9          | 3156       | 3164  | LTA      |         |
| 13 CTGTG | 5              | 3    | 15         | 3504       | 3518  | LTA      |         |
| 14 TTA   | 3              | 4    | 12         | 4163       | 4174  | NCS      |         |
| 15 A     | 1              | 7    | 7          | 4188       | 4194  | NCS      |         |
| 16 A     | 1              | 6    | 6          | 4199       | 4204  | NCS      |         |
| 17 GT    | 2              | 3    | 6          | 4286       | 4291  | STA      |         |
| 18 TC    | 2              | 3    | 6          | 4361       | 4366  | STA      |         |
| 19 TC    | 2              | 3    | 6          | 4463       | 4468  | STA      |         |
| 20 AT    | 2              | 3    | 6          | 4509       | 4514  | STA      |         |
| 21 AG    | 2              | 3    | 6          | 4580       | 4585  | STA, LTA |         |
| 22 T     | 1              | 6    | 6          | 4633       | 4638  | STA, LTA |         |
| 23 T     | 1              | 8    | 8          | 4729       | 4736  | STA, LTA |         |

### BM94

| S.No   | Consensus Rep. | Size | Iterations | Tract-size | Start | End        | Protein |
|--------|----------------|------|------------|------------|-------|------------|---------|
| 1 CCT  | 3              | 3    | 10         | 56         | 65    | NCS        |         |
| 2 T    | 1              | 7    | 7          | 65         | 71    | NCS        |         |
| 3 A    | 1              | 10   | 10         | 115        | 124   | NCS        |         |
| 4 GTT  | 3              | 3    | 10         | 156        | 165   | NCS        |         |
| 5 CG   | 2              | 3    | 6          | 418        | 423   | NCS        |         |
| 6 CA   | 2              | 3    | 6          | 726        | 731   | VP2, VP3   |         |
| 7 AGC  | 3              | 3    | 9          | 816        | 824   | VP2, VP3   |         |
| 8 TC   | 2              | 3    | 6          | 931        | 936   | VP2, VP3   |         |
| 9 GA   | 2              | 3    | 6          | 1208       | 1213  | VP1        |         |
| 10 GAG | 3              | 3    | 9          | 1254       | 1262  | VP1        |         |
| 11 AG  | 2              | 5    | 10         | 2093       | 2102  | NCS        |         |
| 12 AT  | 2              | 3    | 6          | 2266       | 2271  | NCS        |         |
| 13 ACC | 3              | 4    | 11         | 2294       | 2304  | NCS        |         |
| 14 CT  | 2              | 3    | 6          | 2475       | 2480  | LTA        |         |
| 15 T   | 1              | 6    | 6          | 2579       | 2584  | LTA        |         |
| 16 TC  | 2              | 3    | 6          | 2761       | 2766  | LTA        |         |
| 17 T   | 1              | 6    | 6          | 2805       | 2810  | LTA        |         |
| 18 AGC | 3              | 4    | 11         | 2941       | 2951  | LTA        |         |
| 19 TA  | 2              | 3    | 6          | 3038       | 3043  | LTA        |         |
| 20 T   | 1              | 7    | 7          | 3123       | 3129  | LTA        |         |
| 21 AGC | 3              | 3    | 9          | 3637       | 3645  | LTA        |         |
| 22 G   | 1              | 9    | 9          | 4021       | 4029  | LTA, PALTA |         |
| 23 GAG | 3              | 4    | 12         | 4138       | 4149  | LTA, PALTA |         |
| 24 CAG | 3              | 3    | 12         | 4344       | 4355  | STA        |         |
| 25 A   | 1              | 6    | 6          | 4439       | 4444  | STA        |         |

26 CTTTCT 6 3 19 4845 4863 STA, LTA

**BM95**

| S.No | Consensus | Rep. Size | Iterations | Tract-size | Start | End  | Protein    |
|------|-----------|-----------|------------|------------|-------|------|------------|
| 1    | AT        | 2         | 3          | 6          | 75    | 80   | NCS        |
| 2    | A         | 1         | 8          | 8          | 84    | 91   | NCS        |
| 3    | A         | 1         | 6          | 6          | 194   | 199  | NCS        |
| 4    | G         | 1         | 6          | 6          | 565   | 570  | AgnoP, VP2 |
| 5    | AGT       | 3         | 4          | 11         | 592   | 602  | VP2        |
| 6    | GT        | 2         | 3          | 6          | 618   | 623  | VP2        |
| 7    | A         | 1         | 6          | 6          | 1469  | 1474 | VP2, VP3   |
| 8    | T         | 1         | 8          | 8          | 1910  | 1917 | VP1        |
| 9    | G         | 1         | 6          | 6          | 1922  | 1927 | VP1        |
| 10   | G         | 1         | 6          | 6          | 2139  | 2144 | VP1        |
| 11   | TA        | 2         | 3          | 6          | 2461  | 2466 | VP1        |
| 12   | T         | 1         | 6          | 6          | 2736  | 2741 | LTA        |
| 13   | TTGCTC    | 6         | 5          | 31         | 2740  | 2770 | LTA        |
| 14   | TTGCTC    | 6         | 9          | 54         | 2747  | 2800 | LTA        |
| 15   | TTC       | 3         | 3          | 12         | 2795  | 2806 | LTA        |
| 16   | T         | 1         | 6          | 6          | 2823  | 2828 | LTA        |
| 17   | T         | 1         | 9          | 9          | 3065  | 3073 | LTA        |
| 18   | T         | 1         | 7          | 7          | 3166  | 3172 | LTA        |
| 19   | T         | 1         | 8          | 8          | 3182  | 3189 | LTA        |
| 20   | AC        | 2         | 3          | 6          | 3305  | 3310 | LTA        |
| 21   | CA        | 2         | 3          | 6          | 3388  | 3393 | LTA        |
| 22   | T         | 1         | 6          | 6          | 3604  | 3609 | LTA        |
| 23   | T         | 1         | 8          | 8          | 3673  | 3680 | LTA        |
| 24   | T         | 1         | 7          | 7          | 3714  | 3720 | LTA        |
| 25   | C         | 1         | 6          | 6          | 3959  | 3964 | LTA        |
| 26   | AACTAA    | 6         | 3          | 17         | 4043  | 4059 | LTA        |
| 27   | TA        | 2         | 5          | 10         | 4144  | 4153 | LTA        |
| 28   | T         | 1         | 7          | 7          | 4180  | 4186 | LTA        |
| 29   | A         | 1         | 6          | 6          | 4233  | 4238 | LTA        |
| 30   | CT        | 2         | 3          | 6          | 4301  | 4306 | LTA        |
| 31   | T         | 1         | 9          | 9          | 4322  | 4330 | LTA        |
| 32   | T         | 1         | 6          | 6          | 4332  | 4337 | LTA        |
| 33   | TA        | 2         | 5          | 10         | 4522  | 4531 | NCS        |
| 34   | CA        | 2         | 3          | 6          | 4734  | 4739 | STA        |
| 35   | TGCA      | 4         | 3          | 11         | 4749  | 4759 | STA        |
| 36   | T         | 1         | 6          | 6          | 4917  | 4922 | STA, LTA   |
| 37   | AC        | 2         | 3          | 6          | 5003  | 5008 | STA, LTA   |

**BM96**

| S.No | Consensus | Rep. Size | Iterations | Tract-size | Start | End  | Protein    |
|------|-----------|-----------|------------|------------|-------|------|------------|
| 1    | T         | 1         | 6          | 6          | 71    | 76   | NCS        |
| 2    | TA        | 2         | 3          | 6          | 113   | 118  | NCS        |
| 3    | A         | 1         | 9          | 9          | 121   | 129  | NCS        |
| 4    | T         | 1         | 6          | 6          | 542   | 547  | NCS        |
| 5    | GC        | 2         | 3          | 6          | 679   | 684  | VP2        |
| 6    | TA        | 2         | 3          | 6          | 1125  | 1130 | VP2, VP3   |
| 7    | G         | 1         | 6          | 6          | 2094  | 2099 | VP1        |
| 8    | CTA       | 3         | 5          | 14         | 2346  | 2359 | VP1        |
| 9    | A         | 1         | 7          | 7          | 2455  | 2461 | VP1        |
| 10   | G         | 1         | 7          | 7          | 2812  | 2818 | LTA        |
| 11   | TA        | 2         | 3          | 6          | 2970  | 2975 | LTA        |
| 12   | T         | 1         | 6          | 6          | 3036  | 3041 | LTA        |
| 13   | T         | 1         | 6          | 6          | 3163  | 3168 | LTA        |
| 14   | T         | 1         | 6          | 6          | 3178  | 3183 | LTA        |
| 15   | CT        | 2         | 3          | 6          | 3672  | 3677 | LTA        |
| 16   | TA        | 2         | 3          | 6          | 3863  | 3868 | LTA        |
| 17   | T         | 1         | 6          | 6          | 4204  | 4209 | LTA        |
| 18   | G         | 1         | 7          | 7          | 4320  | 4326 | LTA, PALTA |
| 19   | T         | 1         | 6          | 6          | 4340  | 4345 | LTA, PALTA |
| 20   | A         | 1         | 6          | 6          | 4507  | 4512 | NCS        |
| 21   | TC        | 2         | 3          | 6          | 4734  | 4739 | STA        |
| 22   | A         | 1         | 7          | 7          | 4757  | 4763 | STA        |
| 23   | A         | 1         | 6          | 6          | 4911  | 4916 | STA, LTA   |
| 24   | CT        | 2         | 3          | 6          | 4991  | 4996 | STA, LTA   |

**BM97**

| S.No | Consensus | Rep. Size | Iterations | Tract-size | Start | End | Protein |
|------|-----------|-----------|------------|------------|-------|-----|---------|
| 1    | TC        | 2         | 3          | 6          | 13    | 18  | NCS     |

|        |   |   |    |      |               |
|--------|---|---|----|------|---------------|
| 2 A    | 1 | 7 | 7  | 75   | 81 NCS        |
| 3 GC   | 2 | 3 | 6  | 87   | 92 NCS        |
| 4 TG   | 2 | 3 | 6  | 208  | 213 NCS       |
| 5 AC   | 2 | 3 | 6  | 224  | 229 NCS       |
| 6 CT   | 2 | 3 | 6  | 254  | 259 NCS       |
| 7 T    | 1 | 6 | 6  | 340  | 345 NCS       |
| 8 AGC  | 3 | 4 | 12 | 453  | 464 VP2       |
| 9 CT   | 2 | 3 | 6  | 528  | 533 VP2       |
| 10 T   | 1 | 7 | 7  | 579  | 585 VP2, VP3  |
| 11 AG  | 2 | 3 | 6  | 877  | 882 VP2, VP3  |
| 12 GA  | 2 | 3 | 6  | 934  | 939 VP2, VP3  |
| 13 AG  | 2 | 3 | 6  | 1068 | 1073 VP2, VP3 |
| 14 T   | 1 | 7 | 7  | 2050 | 2056 VP1      |
| 15 A   | 1 | 9 | 9  | 2589 | 2597 NCS      |
| 16 T   | 1 | 6 | 6  | 2645 | 2650 LTA      |
| 17 T   | 1 | 7 | 7  | 2891 | 2897 LTA      |
| 18 CA  | 2 | 3 | 6  | 3302 | 3307 LTA      |
| 19 AT  | 2 | 3 | 6  | 3335 | 3340 LTA      |
| 20 AT  | 2 | 3 | 6  | 3407 | 3412 LTA      |
| 21 T   | 1 | 6 | 6  | 3561 | 3566 LTA      |
| 22 AG  | 2 | 3 | 6  | 3983 | 3988 LTA      |
| 23 TA  | 2 | 3 | 6  | 4074 | 4079 LTA      |
| 24 TCT | 3 | 3 | 9  | 4167 | 4175 LTA      |
| 25 TCT | 3 | 4 | 11 | 4228 | 4238 LTA      |
| 26 G   | 1 | 9 | 9  | 4241 | 4249 LTA      |
| 27 G   | 1 | 7 | 7  | 4256 | 4262 LTA      |
| 28 AGG | 3 | 4 | 12 | 4279 | 4290 LTA      |
| 29 AGA | 3 | 5 | 15 | 4303 | 4317 LTA      |
| 30 CTT | 3 | 3 | 9  | 4400 | 4408 LTA      |
| 31 GAG | 3 | 4 | 12 | 4409 | 4420 LTA      |
| 32 G   | 1 | 6 | 6  | 4420 | 4425 LTA      |
| 33 T   | 1 | 7 | 7  | 4733 | 4739 STA      |
| 34 AAT | 3 | 4 | 12 | 4817 | 4828 STA      |
| 35 A   | 1 | 7 | 7  | 4860 | 4866 STA      |
| 36 T   | 1 | 6 | 6  | 4886 | 4891 STA      |
| 37 T   | 1 | 6 | 6  | 4991 | 4996 STA, LTA |
| 38 AG  | 2 | 3 | 6  | 5029 | 5034 STA, LTA |

#### BM98

| S.No | Consensus Rep. | Size | Iterations | Tract-size | Start | End  | Protein        |
|------|----------------|------|------------|------------|-------|------|----------------|
| 1    | CT             | 2    | 3          | 6          | 9     | 14   | NCS            |
| 2    | A              | 1    | 10         | 10         | 70    | 79   | NCS            |
| 3    | CA             | 2    | 3          | 6          | 143   | 148  | NCS            |
| 4    | T              | 1    | 7          | 7          | 260   | 266  | NCS            |
| 5    | AGC            | 3    | 4          | 12         | 456   | 467  | VP2            |
| 6    | TGAG           | 4    | 3          | 12         | 834   | 845  | VP2, VP3       |
| 7    | TG             | 2    | 5          | 10         | 1594  | 1603 | MCP            |
| 8    | TG             | 2    | 6          | 11         | 2053  | 2063 | MCP            |
| 9    | GA             | 2    | 3          | 6          | 2300  | 2305 | MCP            |
| 10   | CAG            | 3    | 4          | 13         | 2324  | 2336 | MCP            |
| 11   | CCT            | 3    | 4          | 12         | 2417  | 2428 | MCP            |
| 12   | AG             | 2    | 3          | 6          | 2467  | 2472 | MCP            |
| 13   | C              | 1    | 6          | 6          | 2579  | 2584 | MCP            |
| 14   | A              | 1    | 6          | 6          | 2669  | 2674 | MCP            |
| 15   | T              | 1    | 7          | 7          | 2757  | 2763 | LTA            |
| 16   | CTC            | 3    | 4          | 12         | 2768  | 2779 | LTA            |
| 17   | CT             | 2    | 3          | 6          | 3608  | 3613 | LTA            |
| 18   | T              | 1    | 6          | 6          | 3679  | 3684 | LTA            |
| 19   | G              | 1    | 7          | 7          | 3786  | 3792 | LTA            |
| 20   | AG             | 2    | 3          | 6          | 4101  | 4106 | LTA            |
| 21   | TA             | 2    | 3          | 6          | 4192  | 4197 | LTA            |
| 22   | TTC            | 3    | 4          | 12         | 4287  | 4298 | LTA, MTA, ALTO |
| 23   | TTG            | 3    | 4          | 12         | 4350  | 4361 | LTA, MTA, ALTO |
| 24   | G              | 1    | 7          | 7          | 4374  | 4380 | LTA, MTA, ALTO |
| 25   | A              | 1    | 9          | 9          | 4648  | 4656 | NCS            |
| 26   | CA             | 2    | 3          | 6          | 4798  | 4803 | STA            |
| 27   | T              | 1    | 6          | 6          | 4817  | 4822 | STA, MTA       |
| 28   | T              | 1    | 7          | 7          | 4824  | 4830 | STA, MTA       |
| 29   | AGG            | 3    | 3          | 10         | 5000  | 5009 | STA, MTA, LTA  |
| 30   | TC             | 2    | 3          | 6          | 5014  | 5019 | STA, MTA, LTA  |
| 31   | T              | 1    | 6          | 6          | 5072  | 5077 | STA, MTA, LTA  |

#### BM99

| S.No | Consensus | Rep. Size | Iterations | Tract-size | Start | End  | Protein |
|------|-----------|-----------|------------|------------|-------|------|---------|
| 1    | GT        | 2         | 3          | 6          | 5     | 10   | NCS     |
| 2    | T         | 1         | 6          | 6          | 25    | 30   | NCS     |
| 3    | GT        | 2         | 4          | 8          | 49    | 56   | NCS     |
| 4    | A         | 1         | 7          | 7          | 179   | 185  | NCS     |
| 5    | C         | 1         | 6          | 6          | 478   | 483  | ORF2    |
| 6    | T         | 1         | 6          | 6          | 619   | 624  | ORF2    |
| 7    | A         | 1         | 6          | 6          | 693   | 698  | NCS     |
| 8    | AG        | 2         | 3          | 6          | 831   | 836  | NCS     |
| 9    | T         | 1         | 10         | 10         | 968   | 977  | ORF1    |
| 10   | T         | 1         | 8          | 8          | 992   | 999  | ORF1    |
| 11   | A         | 1         | 7          | 7          | 1071  | 1077 | ORF1    |
| 12   | A         | 1         | 9          | 9          | 1142  | 1150 | ORF1    |
| 13   | AC        | 2         | 3          | 6          | 1199  | 1204 | ORF1    |
| 14   | CTG       | 3         | 4          | 12         | 1472  | 1483 | VP2     |
| 15   | G         | 1         | 6          | 6          | 1796  | 1801 | VP2     |
| 16   | G         | 1         | 7          | 7          | 1866  | 1872 | VP2     |
| 17   | G         | 1         | 6          | 6          | 1914  | 1919 | VP2     |
| 18   | TGA       | 3         | 4          | 12         | 2136  | 2147 | VP2     |
| 19   | GCA       | 3         | 3          | 9          | 2422  | 2430 | VP2     |
| 20   | TG        | 2         | 3          | 6          | 2919  | 2924 | VP2     |
| 21   | CT        | 2         | 3          | 6          | 3959  | 3964 | VP1     |
| 22   | AAC       | 3         | 3          | 10         | 4015  | 4024 | VP1     |
| 23   | AGC       | 3         | 4          | 11         | 4133  | 4143 | VP1     |
| 24   | AG        | 2         | 3          | 6          | 4155  | 4160 | VP1     |
| 25   | C         | 1         | 7          | 7          | 4278  | 4284 | VP1     |
| 26   | AGC       | 3         | 3          | 9          | 4300  | 4308 | VP1     |
| 27   | A         | 1         | 6          | 6          | 4414  | 4419 | NCS     |
| 28   | AT        | 2         | 7          | 13         | 4656  | 4668 | NCS     |
| 29   | A         | 1         | 6          | 6          | 4700  | 4705 | NCS     |
| 30   | T         | 1         | 7          | 7          | 4747  | 4753 | NCS     |
| 31   | A         | 1         | 8          | 8          | 4836  | 4843 | LTA     |
| 32   | TC        | 2         | 3          | 6          | 4890  | 4895 | LTA     |
| 33   | GTC       | 3         | 4          | 12         | 4918  | 4929 | LTA     |
| 34   | TG        | 2         | 3          | 6          | 5006  | 5011 | LTA     |
| 35   | G         | 1         | 7          | 7          | 5033  | 5039 | LTA     |
| 36   | ACC       | 3         | 3          | 10         | 5271  | 5280 | LTA     |
| 37   | GTC       | 3         | 4          | 12         | 5368  | 5379 | LTA     |
| 38   | G         | 1         | 6          | 6          | 5481  | 5486 | LTA     |
| 39   | GA        | 2         | 3          | 6          | 5777  | 5782 | LTA     |
| 40   | TC        | 2         | 3          | 6          | 5947  | 5952 | LTA     |
| 41   | GACA      | 4         | 3          | 11         | 6277  | 6287 | LTA     |
| 42   | AGC       | 3         | 3          | 9          | 6313  | 6321 | LTA     |
| 43   | AG        | 2         | 3          | 6          | 6715  | 6720 | LTA     |
| 44   | CT        | 2         | 3          | 6          | 6859  | 6864 | LTA     |
| 45   | CT        | 2         | 3          | 6          | 7272  | 7277 | LTA     |

### BM100

| S.No | Consensus | Rep. Size | Iterations | Tract-size | Start | End  | Protein |
|------|-----------|-----------|------------|------------|-------|------|---------|
| 1    | A         | 1         | 6          | 6          | 88    | 93   | NCS     |
| 2    | GC        | 2         | 3          | 6          | 222   | 227  | NCS     |
| 3    | AGT       | 3         | 3          | 9          | 351   | 359  | NCS     |
| 4    | CA        | 2         | 3          | 6          | 873   | 878  | VP2     |
| 5    | GA        | 2         | 3          | 6          | 894   | 899  | VP2     |
| 6    | GA        | 2         | 5          | 11         | 1214  | 1224 | VP2     |
| 7    | AT        | 2         | 3          | 6          | 1264  | 1269 | VP2     |
| 8    | AC        | 2         | 3          | 6          | 1658  | 1663 | VP2     |
| 9    | GT        | 2         | 3          | 6          | 2214  | 2219 | VP1     |
| 10   | A         | 1         | 8          | 8          | 2907  | 2914 | NCS     |
| 11   | A         | 1         | 14         | 14         | 3010  | 3023 | NCS     |
| 12   | A         | 1         | 7          | 7          | 3264  | 3270 | NCS     |
| 13   | A         | 1         | 9          | 9          | 3280  | 3288 | NCS     |
| 14   | TGACCT    | 6         | 3          | 18         | 3290  | 3307 | NCS     |
| 15   | T         | 1         | 6          | 6          | 3337  | 3342 | NCS     |
| 16   | T         | 1         | 6          | 6          | 3351  | 3356 | NCS     |
| 17   | A         | 1         | 6          | 6          | 3400  | 3405 | NCS     |
| 18   | A         | 1         | 6          | 6          | 3444  | 3449 | NCS     |
| 19   | CTC       | 3         | 3          | 9          | 3607  | 3615 | LTA     |
| 20   | CT        | 2         | 3          | 6          | 3623  | 3628 | LTA     |
| 21   | AT        | 2         | 3          | 6          | 3874  | 3879 | LTA     |
| 22   | CA        | 2         | 3          | 6          | 4345  | 4350 | LTA     |
| 23   | AG        | 2         | 3          | 6          | 4379  | 4384 | LTA     |
| 24   | CAG       | 3         | 3          | 11         | 4531  | 4541 | LTA     |
| 25   | AG        | 2         | 3          | 6          | 4680  | 4685 | LTA     |

|        |   |   |    |      |          |
|--------|---|---|----|------|----------|
| 26 AC  | 2 | 3 | 6  | 5212 | 5217 LTA |
| 27 GCA | 3 | 3 | 10 | 5239 | 5248 LTA |

**S4: Raw data for distribution of cSSRs found in the Polyomaviridae genomes.**

**Genome**

**Serial No.**

**BM2**

|            |                                                 |       |      |
|------------|-------------------------------------------------|-------|------|
| BM2 dMax10 | Total No. of Microsatellites found : 30         |       |      |
|            | Total No. of Compound Microsatellites found : 2 |       |      |
| No.        | Compound SSR                                    | Start | End  |
|            | 1 (A)6-x1-(AGA)4                                | 1398  | 1416 |
|            | 2 (CT)3-x4-(TG)3                                | 4562  | 4577 |

|            |                                                 |       |      |
|------------|-------------------------------------------------|-------|------|
| BM2 dMax20 | Total No. of Microsatellites found : 30         |       |      |
|            | Total No. of Compound Microsatellites found : 3 |       |      |
| No.        | Compound SSR                                    | Start | End  |
|            | 1 (AT)3-x16-(AG)3                               | 988   | 1015 |
|            | 2 (A)6-x1-(AGA)4                                | 1398  | 1416 |
|            | 3 (CT)3-x4-(TG)3                                | 4562  | 4577 |

|            |                                                 |       |      |
|------------|-------------------------------------------------|-------|------|
| BM2 dMax30 | Total No. of Microsatellites found : 30         |       |      |
|            | Total No. of Compound Microsatellites found : 4 |       |      |
| No.        | Compound SSR                                    | Start | End  |
|            | 1 (AT)3-x16-(AG)3                               | 988   | 1015 |
|            | 2 (A)6-x1-(AGA)4                                | 1398  | 1416 |
|            | 3 (G)8-x24-(G)12                                | 4194  | 4237 |
|            | 4 (CT)3-x4-(TG)3                                | 4562  | 4577 |

|            |                                                 |       |      |
|------------|-------------------------------------------------|-------|------|
| BM2 dMax40 | Total No. of Microsatellites found : 30         |       |      |
|            | Total No. of Compound Microsatellites found : 5 |       |      |
| No.        | Compound SSR                                    | Start | End  |
|            | 1 (AT)3-x16-(AG)3                               | 988   | 1015 |
|            | 2 (A)6-x1-(AGA)4                                | 1398  | 1416 |
|            | 3 (G)8-x24-(G)12                                | 4194  | 4237 |
|            | 4 (CT)3-x4-(TG)3                                | 4562  | 4577 |
|            | 5 (T)6-x39-(AC)3                                | 4646  | 4696 |

|            |                                                 |       |      |
|------------|-------------------------------------------------|-------|------|
| BM2 dMax50 | Total No. of Microsatellites found : 30         |       |      |
|            | Total No. of Compound Microsatellites found : 5 |       |      |
| No.        | Compound SSR                                    | Start | End  |
|            | 1 (AT)3-x16-(AG)3                               | 988   | 1015 |
|            | 2 (A)6-x1-(AGA)4                                | 1398  | 1416 |
|            | 3 (G)8-x24-(G)12                                | 4194  | 4237 |
|            | 4 (CT)3-x4-(TG)3                                | 4562  | 4577 |
|            | 5 (T)6-x39-(AC)3                                | 4646  | 4696 |

**BM3**

|            |                                                 |       |      |
|------------|-------------------------------------------------|-------|------|
| BM3 dMax10 | Total No. of Microsatellites found : 31         |       |      |
|            | Total No. of Compound Microsatellites found : 2 |       |      |
| No.        | Compound SSR                                    | Start | End  |
|            | 1 (A)6-x3-(C)7                                  | 2299  | 2314 |
|            | 2 (T)6-x7-(C)6                                  | 4866  | 4884 |

|            |                                                 |       |      |
|------------|-------------------------------------------------|-------|------|
| BM3 dMax20 | Total No. of Microsatellites found : 31         |       |      |
|            | Total No. of Compound Microsatellites found : 4 |       |      |
| No.        | Compound SSR                                    | Start | End  |
|            | 1 (A)6-x3-(C)7                                  | 2299  | 2314 |
|            | 2 (T)6-x19-(TTCATC)3                            | 2472  | 2514 |
|            | 3 (T)7-x11-(A)6                                 | 4444  | 4467 |

4 (T)6-x7-(C)6 4866 4884

BM3 dMax30

Total No. of Microsatellites found : 31

Total No. of Compound Microsatellites found : 4

| No. | Compound SSR           | Start | End  |
|-----|------------------------|-------|------|
| 1   | (A)6-x3-(C)7           | 2299  | 2314 |
| 2   | (T)6-x19-(TTCATC)3     | 2472  | 2514 |
| 3   | (T)7-x11-(A)6          | 4444  | 4467 |
| 4   | (T)6-x7-(C)6-x26-(CT)3 | 4866  | 4916 |

BM3 dMax40

Total No. of Microsatellites found : 31

Total No. of Compound Microsatellites found : 6

| No. | Compound SSR                        | Start | End  |
|-----|-------------------------------------|-------|------|
| 1   | (G)6-x32-(G)6                       | 1661  | 1704 |
| 2   | (A)6-x3-(C)7                        | 2299  | 2314 |
| 3   | (T)6-x19-(TTCATC)3                  | 2472  | 2514 |
| 4   | (AG)3-x31-(T)6                      | 3946  | 3988 |
| 5   | (T)7-x11-(A)6                       | 4444  | 4467 |
| 6   | (AATTC)3-x38-(T)6-x7-(C)6-x26-(CT)3 | 4814  | 4916 |

BM3 dMax50

Total No. of Microsatellites found : 31

Total No. of Compound Microsatellites found : 7

| No. | Compound SSR                        | Start | End  |
|-----|-------------------------------------|-------|------|
| 1   | (CCT)3-x48-(A)6                     | 67    | 130  |
| 2   | (G)6-x32-(G)6                       | 1661  | 1704 |
| 3   | (A)6-x3-(C)7                        | 2299  | 2314 |
| 4   | (T)6-x19-(TTCATC)3                  | 2472  | 2514 |
| 5   | (AG)3-x31-(T)6                      | 3946  | 3988 |
| 6   | (T)7-x11-(A)6                       | 4444  | 4467 |
| 7   | (AATTC)3-x38-(T)6-x7-(C)6-x26-(CT)3 | 4814  | 4916 |

**BM4**

BM4 dMax10

Total No. of Microsatellites found : 37

Total No. of Compound Microsatellites found : 4

| No. | Compound SSR   | Start | End  |
|-----|----------------|-------|------|
| 1   | (CT)3-x-1-(T)6 | 1     | 11   |
| 2   | (T)7-x1-(T)7   | 683   | 697  |
| 3   | (CT)3-x6-(TC)3 | 3013  | 3030 |
| 4   | (T)6-x3-(TAG)4 | 4332  | 4351 |

BM4 dMax20

Total No. of Microsatellites found : 37

Total No. of Compound Microsatellites found : 6

| No. | Compound SSR             | Start | End  |
|-----|--------------------------|-------|------|
| 1   | (CT)3-x-1-(T)6           | 1     | 11   |
| 2   | (CT)3-x10-(A)8           | 136   | 159  |
| 3   | (T)7-x1-(T)7             | 683   | 697  |
| 4   | (T)6-x19-(TC)3           | 1293  | 1323 |
| 5   | (CT)3-x6-(TC)3           | 3013  | 3030 |
| 6   | (T)6-x3-(TAG)4-x14-(CA)3 | 4332  | 4371 |

BM4 dMax30

Total No. of Microsatellites found : 37

Total No. of Compound Microsatellites found : 7

| No. | Compound SSR             | Start | End  |
|-----|--------------------------|-------|------|
| 1   | (CT)3-x-1-(T)6           | 1     | 11   |
| 2   | (CT)3-x10-(A)8           | 136   | 159  |
| 3   | (T)7-x20-(A)7            | 405   | 438  |
| 4   | (T)7-x1-(T)7             | 683   | 697  |
| 5   | (T)6-x19-(TC)3           | 1293  | 1323 |
| 6   | (CT)3-x6-(TC)3           | 3013  | 3030 |
| 7   | (T)6-x3-(TAG)4-x14-(CA)3 | 4332  | 4371 |

BM4 dMax40 Total No. of Microsatellites found : 37

Total No. of Compound Microsatellites found : 7

| No. | Compound SSR             | Start | End  |
|-----|--------------------------|-------|------|
| 1   | (CT)3-x-1-(T)6           | 1     | 11   |
| 2   | (CT)3-x10-(A)8           | 136   | 159  |
| 3   | (T)7-x20-(A)7            | 405   | 438  |
| 4   | (T)7-x1-(T)7             | 683   | 697  |
| 5   | (T)6-x19-(TC)3           | 1293  | 1323 |
| 6   | (CT)3-x6-(TC)3           | 3013  | 3030 |
| 7   | (T)6-x3-(TAG)4-x14-(CA)3 | 4332  | 4371 |

BM4 dMax50 Total No. of Microsatellites found : 37

Total No. of Compound Microsatellites found : 9

| No. | Compound SSR             | Start | End  |
|-----|--------------------------|-------|------|
| 1   | (CT)3-x-1-(T)6           | 1     | 11   |
| 2   | (GC)3-x46-(CT)3-x10-(A)8 | 84    | 159  |
| 3   | (T)7-x20-(A)7            | 405   | 438  |
| 4   | (T)7-x1-(T)7             | 683   | 697  |
| 5   | (T)6-x19-(TC)3           | 1293  | 1323 |
| 6   | (AAT)4-x44-(AG)3         | 2419  | 2479 |
| 7   | (CT)3-x6-(TC)3           | 3013  | 3030 |
| 8   | (T)6-x3-(TAG)4-x14-(CA)3 | 4332  | 4371 |
| 9   | (TC)3-x40-(A)10          | 4550  | 4605 |

## BM5

BM5 dMax10 Total No. of Microsatellites found : 24

Total No. of Compound Microsatellites found : 1

| No. | Compound SSR  | Start | End  |
|-----|---------------|-------|------|
| 1   | (AT)3-x3-(T)7 | 3471  | 3486 |

BM5 dMax20 Total No. of Microsatellites found : 24

Total No. of Compound Microsatellites found : 3

| No. | Compound SSR    | Start | End  |
|-----|-----------------|-------|------|
| 1   | (CT)5-x13-(AG)3 | 163   | 191  |
| 2   | (T)7-x10-(T)7   | 3186  | 3209 |
| 3   | (AT)3-x3-(T)7   | 3471  | 3486 |

BM5 dMax30 Total No. of Microsatellites found : 24

Total No. of Compound Microsatellites found : 5

| No. | Compound SSR             | Start | End  |
|-----|--------------------------|-------|------|
| 1   | (CT)5-x13-(AG)3-x29-(A)8 | 163   | 228  |
| 2   | (CG)4-x23-(T)6           | 478   | 514  |
| 3   | (GA)3-x28-(AG)3          | 1026  | 1065 |
| 4   | (T)7-x10-(T)7            | 3186  | 3209 |
| 5   | (AT)3-x3-(T)7            | 3471  | 3486 |

|            |                                                 |       |      |
|------------|-------------------------------------------------|-------|------|
| BM5 dMax40 | Total No. of Microsatellites found : 24         |       |      |
|            | Total No. of Compound Microsatellites found : 5 |       |      |
| No.        | Compound SSR                                    | Start | End  |
| 1          | (CT)5-x13-(AG)3-x29-(A)8                        | 163   | 228  |
| 2          | (CG)4-x23-(T)6-x35-(T)6                         | 478   | 555  |
| 3          | (GA)3-x28-(AG)3                                 | 1026  | 1065 |
| 4          | (T)7-x10-(T)7                                   | 3186  | 3209 |
| 5          | (AT)3-x3-(T)7                                   | 3471  | 3486 |

|            |                                                 |       |      |
|------------|-------------------------------------------------|-------|------|
| BM5 dMax50 | Total No. of Microsatellites found : 24         |       |      |
|            | Total No. of Compound Microsatellites found : 5 |       |      |
| No.        | Compound SSR                                    | Start | End  |
| 1          | (CT)5-x13-(AG)3-x29-(A)8                        | 163   | 228  |
| 2          | (CG)4-x23-(T)6-x35-(T)6                         | 478   | 555  |
| 3          | (GA)3-x28-(AG)3                                 | 1026  | 1065 |
| 4          | (T)7-x10-(T)7                                   | 3186  | 3209 |
| 5          | (AT)3-x3-(T)7                                   | 3471  | 3486 |

## BM6

|            |                                                 |       |     |
|------------|-------------------------------------------------|-------|-----|
| BM6 dMax10 | Total No. of Microsatellites found : 30         |       |     |
|            | Total No. of Compound Microsatellites found : 2 |       |     |
| No.        | Compound SSR                                    | Start | End |
| 1          | (CT)4-x4-(A)12                                  | 141   | 164 |
| 2          | (T)9-x4-(G)6                                    | 414   | 432 |

|            |                                                 |       |     |
|------------|-------------------------------------------------|-------|-----|
| BM6 dMax20 | Total No. of Microsatellites found : 30         |       |     |
|            | Total No. of Compound Microsatellites found : 2 |       |     |
| No.        | Compound SSR                                    | Start | End |
| 1          | (CT)4-x4-(A)12                                  | 141   | 164 |
| 2          | (T)9-x4-(G)6                                    | 414   | 432 |

|            |                                                 |       |      |
|------------|-------------------------------------------------|-------|------|
| BM6 dMax30 | Total No. of Microsatellites found : 30         |       |      |
|            | Total No. of Compound Microsatellites found : 5 |       |      |
| No.        | Compound SSR                                    | Start | End  |
| 1          | (CT)4-x4-(A)12                                  | 141   | 164  |
| 2          | (T)9-x4-(G)6                                    | 414   | 432  |
| 3          | (ACT)4-x21-(CT)3                                | 479   | 517  |
| 4          | (CCCCAG)4-x25-(CTC)4                            | 2328  | 2389 |
| 5          | (A)6-x21-(TA)4                                  | 3959  | 3993 |

|            |                                                 |       |      |
|------------|-------------------------------------------------|-------|------|
| BM6 dMax40 | Total No. of Microsatellites found : 30         |       |      |
|            | Total No. of Compound Microsatellites found : 5 |       |      |
| No.        | Compound SSR                                    | Start | End  |
| 1          | (AG)3-x39-(CCT)3-x37-(CT)4-x4-(A)12             | 49    | 164  |
| 2          | (T)7-x38-(T)8-x38-(T)7-x38-(T)9-x4-(G)6         | 278   | 432  |
| 3          | (ACT)4-x21-(CT)3                                | 479   | 517  |
| 4          | (CCCCAG)4-x25-(CTC)4                            | 2328  | 2389 |
| 5          | (A)6-x21-(TA)4                                  | 3959  | 3993 |

|            |                                                              |       |      |
|------------|--------------------------------------------------------------|-------|------|
| BM6 dMax50 | Total No. of Microsatellites found : 30                      |       |      |
|            | Total No. of Compound Microsatellites found : 5              |       |      |
| No.        | Compound SSR                                                 | Start | End  |
| 1          | (AG)3-x39-(CCT)3-x37-(CT)4-x4-(A)12                          | 49    | 164  |
| 2          | (T)7-x38-(T)8-x38-(T)7-x38-(T)9-x4-(G)6-x46-(ACT)4-x21-(CT)3 | 278   | 517  |
| 3          | (CCCCAG)4-x25-(CTC)4                                         | 2328  | 2389 |
| 4          | (A)6-x21-(TA)4                                               | 3959  | 3993 |

5 (TGC)4-x48-(TCT)4 4654 4725

## BM7

BM7 dMax10 Total No. of Microsatellites found : 35  
Total No. of Compound Microsatellites found : 3

| No. | Compound SSR                          | Start | End  |
|-----|---------------------------------------|-------|------|
| 1   | (T)7-x9-(AGG)3                        | 297   | 322  |
| 2   | (A)6-x5-(ATTTCC)3-x0-(TCT)4-x3-(TCT)5 | 2564  | 2623 |
| 3   | (ATC)3-x3-(G)9                        | 4339  | 4359 |

BM7 dMax20 Total No. of Microsatellites found : 35  
Total No. of Compound Microsatellites found : 4

| No. | Compound SSR                                   | Start | End  |
|-----|------------------------------------------------|-------|------|
| 1   | (A)6-x11-(TA)3-x10-(GC)3                       | 20    | 58   |
| 2   | (T)7-x9-(AGG)3-x18-(T)6                        | 297   | 346  |
| 3   | (A)6-x17-(A)6-x5-(ATTTCC)3-x0-(TCT)4-x3-(TCT)5 | 2541  | 2623 |
| 4   | (ATC)3-x3-(G)9-x18-(AT)3                       | 4339  | 4383 |

BM7 dMax30 Total No. of Microsatellites found : 35  
Total No. of Compound Microsatellites found : 6

| No. | Compound SSR                                   | Start | End  |
|-----|------------------------------------------------|-------|------|
| 1   | (A)6-x11-(TA)3-x10-(GC)3-x23-(CCT)3            | 20    | 91   |
| 2   | (T)7-x9-(AGG)3-x18-(T)6                        | 297   | 346  |
| 3   | (CTC)5-x21-(CTC)4                              | 2424  | 2472 |
| 4   | (A)6-x17-(A)6-x5-(ATTTCC)3-x0-(TCT)4-x3-(TCT)5 | 2541  | 2623 |
| 5   | (AGG)4-x20-(G)6                                | 4138  | 4174 |
| 6   | (ATC)3-x3-(G)9-x18-(AT)3                       | 4339  | 4383 |

BM7 dMax40 Total No. of Microsatellites found : 35  
Total No. of Compound Microsatellites found : 7

| No. | Compound SSR                                   | Start | End  |
|-----|------------------------------------------------|-------|------|
| 1   | (A)6-x11-(TA)3-x10-(GC)3-x23-(CCT)3            | 20    | 91   |
| 2   | (T)7-x9-(AGG)3-x18-(T)6                        | 297   | 346  |
| 3   | (A)6-x36-(A)7                                  | 1061  | 1109 |
| 4   | (CTC)5-x21-(CTC)4                              | 2424  | 2472 |
| 5   | (A)6-x17-(A)6-x5-(ATTTCC)3-x0-(TCT)4-x3-(TCT)5 | 2541  | 2623 |
| 6   | (AGG)4-x20-(G)6                                | 4138  | 4174 |
| 7   | (ATC)3-x3-(G)9-x18-(AT)3                       | 4339  | 4383 |

BM7 dMax50 Total No. of Microsatellites found : 35  
Total No. of Compound Microsatellites found : 7

| No. | Compound SSR                                   | Start | End  |
|-----|------------------------------------------------|-------|------|
| 1   | (A)6-x11-(TA)3-x10-(GC)3-x23-(CCT)3-x49-(A)9   | 20    | 149  |
| 2   | (T)8-x46-(T)7-x9-(AGG)3-x18-(T)6               | 243   | 346  |
| 3   | (A)6-x36-(A)7                                  | 1061  | 1109 |
| 4   | (CTC)5-x21-(CTC)4                              | 2424  | 2472 |
| 5   | (A)6-x17-(A)6-x5-(ATTTCC)3-x0-(TCT)4-x3-(TCT)5 | 2541  | 2623 |
| 6   | (GT)3-x41-(AGG)4-x20-(G)6                      | 4091  | 4174 |
| 7   | (ATC)3-x3-(G)9-x18-(AT)3                       | 4339  | 4383 |

## BM8

BM8 dMax10 Total No. of Microsatellites found : 30  
Total No. of Compound Microsatellites found : 3

| No. | Compound SSR    | Start | End  |
|-----|-----------------|-------|------|
| 1   | (CT)3-x2-(CCT)3 | 54    | 71   |
| 2   | (CTT)5-x8-(TC)3 | 4192  | 4219 |
| 3   | (TC)3-x1-(AGG)7 | 4369  | 4396 |

|            |                                                 |                          |       |      |
|------------|-------------------------------------------------|--------------------------|-------|------|
| BM8 dMax20 | Total No. of Microsatellites found : 30         |                          |       |      |
|            | Total No. of Compound Microsatellites found : 4 |                          |       |      |
|            | No.                                             | Compound SSR             | Start | End  |
|            | 1                                               | (CT)3-x2-(CCT)3          | 54    | 71   |
|            | 2                                               | (T)6-x16-(A)8            | 3506  | 3535 |
|            | 3                                               | (CTT)5-x8-(TC)3          | 4192  | 4219 |
|            | 4                                               | (TC)3-x1-(AGG)7          | 4369  | 4396 |
| BM8 dMax30 | Total No. of Microsatellites found : 30         |                          |       |      |
|            | Total No. of Compound Microsatellites found : 5 |                          |       |      |
|            | No.                                             | Compound SSR             | Start | End  |
|            | 1                                               | (CT)3-x2-(CCT)3          | 54    | 71   |
|            | 2                                               | (TAATTT)3-x20-(CT)3      | 372   | 416  |
|            | 3                                               | (T)6-x16-(A)8            | 3506  | 3535 |
|            | 4                                               | (CTT)5-x8-(TC)3          | 4192  | 4219 |
|            | 5                                               | (TC)3-x1-(AGG)7          | 4369  | 4396 |
| BM8 dMax40 | Total No. of Microsatellites found : 30         |                          |       |      |
|            | Total No. of Compound Microsatellites found : 5 |                          |       |      |
|            | No.                                             | Compound SSR             | Start | End  |
|            | 1                                               | (CT)3-x2-(CCT)3          | 54    | 71   |
|            | 2                                               | (TAATTT)3-x20-(CT)3      | 372   | 416  |
|            | 3                                               | (T)6-x16-(A)8            | 3506  | 3535 |
|            | 4                                               | (CTT)5-x8-(TC)3          | 4192  | 4219 |
|            | 5                                               | (TC)3-x1-(AGG)7          | 4369  | 4396 |
| BM8 dMax50 | Total No. of Microsatellites found : 30         |                          |       |      |
|            | Total No. of Compound Microsatellites found : 6 |                          |       |      |
|            | No.                                             | Compound SSR             | Start | End  |
|            | 1                                               | (CT)3-x2-(CCT)3-x49-(A)9 | 54    | 129  |
|            | 2                                               | (TAATTT)3-x20-(CT)3      | 372   | 416  |
|            | 3                                               | (GCA)4-x46-(AAAT)3       | 2221  | 2290 |
|            | 4                                               | (T)6-x16-(A)8-x49-(AC)5  | 3506  | 3594 |
|            | 5                                               | (CTT)5-x8-(TC)3          | 4192  | 4219 |
|            | 6                                               | (TC)3-x1-(AGG)7          | 4369  | 4396 |

## BM9

|            |                                                 |                             |       |      |
|------------|-------------------------------------------------|-----------------------------|-------|------|
| BM9 dMax10 | Total No. of Microsatellites found : 31         |                             |       |      |
|            | Total No. of Compound Microsatellites found : 4 |                             |       |      |
|            | No.                                             | Compound SSR                | Start | End  |
|            | 1                                               | (CT)4-x9-(GAG)4             | 114   | 142  |
|            | 2                                               | (T)7-x1-(GGTT)3             | 3257  | 3276 |
|            | 3                                               | (AT)3-x1-(A)6               | 4026  | 4038 |
|            | 4                                               | (T)6-x3-(T)9                | 4640  | 4657 |
| BM9 dMax20 | Total No. of Microsatellites found : 31         |                             |       |      |
|            | Total No. of Compound Microsatellites found : 6 |                             |       |      |
|            | No.                                             | Compound SSR                | Start | End  |
|            | 1                                               | (CT)4-x9-(GAG)4             | 114   | 142  |
|            | 2                                               | (T)7-x1-(GGTT)3             | 3257  | 3276 |
|            | 3                                               | (AT)3-x1-(A)6               | 4026  | 4038 |
|            | 4                                               | (ATAC)3-x15-(CTT)4-x16-(G)6 | 4083  | 4142 |
|            | 5                                               | (TCT)4-x11-(AGG)5           | 4213  | 4250 |
|            | 6                                               | (T)6-x3-(T)9                | 4640  | 4657 |
| BM9 dMax30 | Total No. of Microsatellites found : 31         |                             |       |      |
|            | Total No. of Compound Microsatellites found : 7 |                             |       |      |

| No. | Compound SSR                | Start | End  |
|-----|-----------------------------|-------|------|
| 1   | (CT)4-x9-(GAG)4             | 114   | 142  |
| 2   | (T)6-x27-(G)6               | 460   | 498  |
| 3   | (T)7-x1-(GGTT)3             | 3257  | 3276 |
| 4   | (AT)3-x1-(A)6               | 4026  | 4038 |
| 5   | (ATAC)3-x15-(CTT)4-x16-(G)6 | 4083  | 4142 |
| 6   | (TCT)4-x11-(AGG)5           | 4213  | 4250 |
| 7   | (T)6-x3-(T)9                | 4640  | 4657 |

BM9 dMax40 Total No. of Microsatellites found : 31  
Total No. of Compound Microsatellites found : 8

| No. | Compound SSR                | Start | End  |
|-----|-----------------------------|-------|------|
| 1   | (CT)4-x9-(GAG)4-x32-(A)6    | 114   | 180  |
| 2   | (T)6-x27-(G)6               | 460   | 498  |
| 3   | (AGA)4-x35-(A)7             | 1428  | 1482 |
| 4   | (T)7-x1-(GGTT)3             | 3257  | 3276 |
| 5   | (AT)3-x1-(A)6               | 4026  | 4038 |
| 6   | (ATAC)3-x15-(CTT)4-x16-(G)6 | 4083  | 4142 |
| 7   | (TCT)4-x11-(AGG)5           | 4213  | 4250 |
| 8   | (T)6-x3-(T)9                | 4640  | 4657 |

BM9 dMax50 Total No. of Microsatellites found : 31  
Total No. of Compound Microsatellites found : 8

| No. | Compound SSR                                  | Start | End  |
|-----|-----------------------------------------------|-------|------|
| 1   | (CT)4-x9-(GAG)4-x32-(A)6                      | 114   | 180  |
| 2   | (T)6-x27-(G)6                                 | 460   | 498  |
| 3   | (AGA)4-x35-(A)7                               | 1428  | 1482 |
| 4   | (T)7-x1-(GGTT)3                               | 3257  | 3276 |
| 5   | (T)7-x48-(CAA)3                               | 3586  | 3650 |
| 6   | (AT)3-x1-(A)6-x44-(ATAC)3-x15-(CTT)4-x16-(G)6 | 4026  | 4142 |
| 7   | (TCT)4-x11-(AGG)5                             | 4213  | 4250 |
| 8   | (T)6-x3-(T)9                                  | 4640  | 4657 |

## BM10

BM10 dMax10 Total No. of Microsatellites found : 26  
Total No. of Compound Microsatellites found : 2

| No. | Compound SSR     | Start | End  |
|-----|------------------|-------|------|
| 1   | (CCT)3-x6-(AGA)4 | 135   | 163  |
| 2   | (AC)3-x2-(T)6    | 3595  | 3608 |

BM10 dMax20 Total No. of Microsatellites found : 26  
Total No. of Compound Microsatellites found : 4

| No. | Compound SSR                        | Start | End  |
|-----|-------------------------------------|-------|------|
| 1   | (CCT)3-x6-(AGA)4-x17-(CT)3-x10-(A)7 | 135   | 203  |
| 2   | (AGG)4-x19-(C)6                     | 1220  | 1256 |
| 3   | (AC)3-x2-(T)6                       | 3595  | 3608 |
| 4   | (T)7-x12-(TA)3                      | 4672  | 4696 |

BM10 dMax30 Total No. of Microsatellites found : 26  
Total No. of Compound Microsatellites found : 4

| No. | Compound SSR                                  | Start | End  |
|-----|-----------------------------------------------|-------|------|
| 1   | (CCT)3-x6-(AGA)4-x17-(CT)3-x10-(A)7-x23-(GT)3 | 135   | 232  |
| 2   | (AGG)4-x19-(C)6                               | 1220  | 1256 |
| 3   | (AC)3-x2-(T)6                                 | 3595  | 3608 |
| 4   | (T)7-x12-(TA)3                                | 4672  | 4696 |

BM10 dMax40 Total No. of Microsatellites found : 26  
Total No. of Compound Microsatellites found : 5

| No. | Compound SSR                                  | Start | End |
|-----|-----------------------------------------------|-------|-----|
| 1   | (CCT)3-x6-(AGA)4-x17-(CT)3-x10-(A)7-x23-(GT)3 | 135   | 232 |

|                   |      |      |
|-------------------|------|------|
| 2 (T)6-x30-(TCT)4 | 491  | 537  |
| 3 (AGG)4-x19-(C)6 | 1220 | 1256 |
| 4 (AC)3-x2-(T)6   | 3595 | 3608 |
| 5 (T)7-x12-(TA)3  | 4672 | 4696 |

BM10 dMax50 Total No. of Microsatellites found : 26

Total No. of Compound Microsatellites found : 7

| No. | Compound SSR                                  | Start | End  |
|-----|-----------------------------------------------|-------|------|
| 1   | (CCT)3-x6-(AGA)4-x17-(CT)3-x10-(A)7-x23-(GT)3 | 135   | 232  |
| 2   | (CA)3-x40-(A)6                                | 386   | 437  |
| 3   | (T)6-x30-(TCT)4                               | 491   | 537  |
| 4   | (AGG)4-x19-(C)6                               | 1220  | 1256 |
| 5   | (AT)3-x47-(T)6                                | 3452  | 3510 |
| 6   | (AC)3-x2-(T)6                                 | 3595  | 3608 |
| 7   | (T)7-x12-(TA)3                                | 4672  | 4696 |

## BM11

BM11 dMax10 Total No. of Microsatellites found : 36

Total No. of Compound Microsatellites found : 1

| No. | Compound SSR   | Start | End |
|-----|----------------|-------|-----|
| 1   | (T)7-x9-(AGG)3 | 366   | 391 |

BM11 dMax20 Total No. of Microsatellites found : 36

Total No. of Compound Microsatellites found : 3

| No. | Compound SSR                       | Start | End  |
|-----|------------------------------------|-------|------|
| 1   | (T)7-x11-(GGC)3-x18-(T)7-x9-(AGG)3 | 321   | 391  |
| 2   | (G)6-x10-(T)6                      | 435   | 456  |
| 3   | (TC)3-x14-(TCT)3                   | 3179  | 3207 |

BM11 dMax30 Total No. of Microsatellites found : 36

Total No. of Compound Microsatellites found : 5

| No. | Compound SSR                       | Start | End  |
|-----|------------------------------------|-------|------|
| 1   | (T)7-x11-(GGC)3-x18-(T)7-x9-(AGG)3 | 321   | 391  |
| 2   | (G)6-x10-(T)6                      | 435   | 456  |
| 3   | (TTC)3-x20-(C)6                    | 2390  | 2424 |
| 4   | (ATA)3-x22-(TCT)4                  | 2572  | 2614 |
| 5   | (TC)3-x14-(TCT)3                   | 3179  | 3207 |

BM11 dMax40 Total No. of Microsatellites found : 36

Total No. of Compound Microsatellites found : 6

| No. | Compound SSR                       | Start | End  |
|-----|------------------------------------|-------|------|
| 1   | (T)7-x38-(T)7                      | 221   | 272  |
| 2   | (T)7-x11-(GGC)3-x18-(T)7-x9-(AGG)3 | 321   | 391  |
| 3   | (G)6-x10-(T)6                      | 435   | 456  |
| 4   | (A)7-x32-(TTC)3-x20-(C)6           | 2351  | 2424 |
| 5   | (ATA)3-x22-(TCT)4                  | 2572  | 2614 |
| 6   | (TC)3-x14-(TCT)3                   | 3179  | 3207 |

BM11 dMax50 Total No. of Microsatellites found : 36

Total No. of Compound Microsatellites found : 6

| No. | Compound SSR                                                  | Start | End  |
|-----|---------------------------------------------------------------|-------|------|
| 1   | (T)7-x38-(T)7-x48-(T)7-x11-(GGC)3-x18-(T)7-x9-(AGG)3-x43-(G)6 | 221   | 456  |
| 2   | (AT)3-x41-(AT)3                                               | 2186  | 2238 |
| 3   | (A)7-x32-(TTC)3-x20-(C)6                                      | 2351  | 2424 |
| 4   | (ATA)3-x22-(TCT)4                                             | 2572  | 2614 |
| 5   | (T)6-x49-(TC)3                                                | 2753  | 2813 |
| 6   | (TC)3-x14-(TCT)3                                              | 3179  | 3207 |

**BM12**

BM12 dMax10 Total No. of Microsatellites found : 36  
Total No. of Compound Microsatellites found : 1

| No. | Compound SSR  | Start | End  |
|-----|---------------|-------|------|
| 1   | (A)7-x8-(TA)3 | 4984  | 5004 |

BM12 dMax20 Total No. of Microsatellites found : 36  
Total No. of Compound Microsatellites found : 3

| No. | Compound SSR     | Start | End  |
|-----|------------------|-------|------|
| 1   | (CCCT)3-x17-(G)6 | 1209  | 1242 |
| 2   | (TCC)3-x11-(A)8  | 4826  | 4853 |
| 3   | (A)7-x8-(TA)3    | 4984  | 5004 |

BM12 dMax30 Total No. of Microsatellites found : 36  
Total No. of Compound Microsatellites found : 4

| No. | Compound SSR     | Start | End  |
|-----|------------------|-------|------|
| 1   | (C)6-x24-(C)6    | 1063  | 1098 |
| 2   | (CCCT)3-x17-(G)6 | 1209  | 1242 |
| 3   | (TCC)3-x11-(A)8  | 4826  | 4853 |
| 4   | (A)7-x8-(TA)3    | 4984  | 5004 |

BM12 dMax40 Total No. of Microsatellites found : 36  
Total No. of Compound Microsatellites found : 4

| No. | Compound SSR                      | Start | End  |
|-----|-----------------------------------|-------|------|
| 1   | (C)6-x24-(C)6                     | 1063  | 1098 |
| 2   | (CCCT)3-x17-(G)6                  | 1209  | 1242 |
| 3   | (C)6-x38-(TCC)3-x11-(A)8-x33-(A)9 | 4782  | 4895 |
| 4   | (A)7-x8-(TA)3                     | 4984  | 5004 |

BM12 dMax50 Total No. of Microsatellites found : 36  
Total No. of Compound Microsatellites found : 4

| No. | Compound SSR                                                 | Start | End  |
|-----|--------------------------------------------------------------|-------|------|
| 1   | (C)6-x24-(C)6                                                | 1063  | 1098 |
| 2   | (CCCT)3-x17-(G)6                                             | 1209  | 1242 |
| 3   | (AG)3-x49-(GT)3                                              | 3692  | 3752 |
| 4   | (C)6-x38-(TCC)3-x11-(A)8-x33-(A)9-x41-(A)7-x40-(A)7-x8-(TA)3 | 4782  | 5004 |

**BM13**

BM13 dMax10 Total No. of Microsatellites found : 32  
Total No. of Compound Microsatellites found : 2

| No. | Compound SSR   | Start | End  |
|-----|----------------|-------|------|
| 1   | (T)11-x4-(A)13 | 343   | 370  |
| 2   | (T)7-x9-(T)6   | 2864  | 2885 |

BM13 dMax20 Total No. of Microsatellites found : 32  
Total No. of Compound Microsatellites found : 5

| No. | Compound SSR              | Start | End  |
|-----|---------------------------|-------|------|
| 1   | (AAC)3-x14-(T)11-x4-(A)13 | 320   | 370  |
| 2   | (A)7-x14-(T)6             | 1371  | 1397 |
| 3   | (T)7-x9-(T)6              | 2864  | 2885 |
| 4   | (T)7-x10-(TCA)3           | 3158  | 3184 |
| 5   | (G)8-x15-(TCC)4           | 4171  | 4205 |

BM13 dMax30 Total No. of Microsatellites found : 32  
Total No. of Compound Microsatellites found : 5

| No. | Compound SSR              | Start | End  |
|-----|---------------------------|-------|------|
| 1   | (AAC)3-x14-(T)11-x4-(A)13 | 320   | 370  |
| 2   | (A)7-x14-(T)6             | 1371  | 1397 |
| 3   | (T)7-x9-(T)6              | 2864  | 2885 |
| 4   | (T)7-x10-(TCA)3           | 3158  | 3184 |
| 5   | (G)8-x15-(TCC)4           | 4171  | 4205 |

BM13 dMax40 Total No. of Microsatellites found : 32  
Total No. of Compound Microsatellites found : 5

| No. | Compound SSR              | Start | End  |
|-----|---------------------------|-------|------|
| 1   | (AAC)3-x14-(T)11-x4-(A)13 | 320   | 370  |
| 2   | (A)7-x14-(T)6             | 1371  | 1397 |
| 3   | (T)7-x9-(T)6              | 2864  | 2885 |
| 4   | (T)7-x10-(TCA)3           | 3158  | 3184 |
| 5   | (G)7-x35-(G)8-x15-(TCC)4  | 4129  | 4205 |

BM13 dMax50 Total No. of Microsatellites found : 32  
Total No. of Compound Microsatellites found : 6

| No. | Compound SSR              | Start | End  |
|-----|---------------------------|-------|------|
| 1   | (T)7-x42-(A)10            | 67    | 125  |
| 2   | (AAC)3-x14-(T)11-x4-(A)13 | 320   | 370  |
| 3   | (A)7-x14-(T)6             | 1371  | 1397 |
| 4   | (G)6-x47-(T)7-x9-(T)6     | 2811  | 2885 |
| 5   | (T)7-x10-(TCA)3           | 3158  | 3184 |
| 6   | (G)7-x35-(G)8-x15-(TCC)4  | 4129  | 4205 |

## BM14

BM14 dMax10 Total No. of Microsatellites found : 35  
Total No. of Compound Microsatellites found : 0

BM14 dMax20 Total No. of Microsatellites found : 35  
Total No. of Compound Microsatellites found : 4

| No. | Compound SSR      | Start | End  |
|-----|-------------------|-------|------|
| 1   | (GCCT)3-x11-(A)12 | 105   | 138  |
| 2   | (CT)3-x12-(TAA)3  | 3406  | 3432 |
| 3   | (TCT)4-x10-(CT)4  | 4162  | 4190 |
| 4   | (A)7-x15-(A)6     | 4510  | 4537 |

BM14 dMax30 Total No. of Microsatellites found : 35  
Total No. of Compound Microsatellites found : 6

| No. | Compound SSR      | Start | End  |
|-----|-------------------|-------|------|
| 1   | (GCCT)3-x11-(A)12 | 105   | 138  |
| 2   | (G)6-x28-(T)7     | 2923  | 2963 |
| 3   | (AT)3-x22-(AGTT)3 | 3225  | 3263 |
| 4   | (CT)3-x12-(TAA)3  | 3406  | 3432 |
| 5   | (TCT)4-x10-(CT)4  | 4162  | 4190 |
| 6   | (A)7-x15-(A)6     | 4510  | 4537 |

BM14 dMax40 Total No. of Microsatellites found : 35  
Total No. of Compound Microsatellites found : 6

| No. | Compound SSR                | Start | End  |
|-----|-----------------------------|-------|------|
| 1   | (TC)4-x30-(GCCT)3-x11-(A)12 | 67    | 138  |
| 2   | (G)6-x28-(T)7-x32-(TC)3     | 2923  | 3001 |
| 3   | (AT)3-x22-(AGTT)3           | 3225  | 3263 |
| 4   | (CT)3-x12-(TAA)3            | 3406  | 3432 |
| 5   | (TCT)4-x10-(CT)4            | 4162  | 4190 |
| 6   | (A)7-x15-(A)6               | 4510  | 4537 |

BM14 dMax50 Total No. of Microsatellites found : 35  
Total No. of Compound Microsatellites found : 6

RESULTS: 1 - 6

| No. | Compound SSR                | Start | End  |
|-----|-----------------------------|-------|------|
| 1   | (TC)4-x30-(GCCT)3-x11-(A)12 | 67    | 138  |
| 2   | (G)6-x28-(T)7-x32-(TC)3     | 2923  | 3001 |
| 3   | (AT)3-x22-(AGTT)3           | 3225  | 3263 |
| 4   | (CT)3-x12-(TAA)3            | 3406  | 3432 |
| 5   | (TCT)4-x10-(CT)4            | 4162  | 4190 |
| 6   | (A)7-x15-(A)6               | 4510  | 4537 |

## BM15

BM15 dMax10 Total No. of Microsatellites found : 25  
Total No. of Compound Microsatellites found : 2

| No. | Compound SSR   | Start | End |
|-----|----------------|-------|-----|
| 1   | (CT)4-x-1-(T)8 | 154   | 168 |
| 2   | (T)8-x9-(AGG)3 | 401   | 427 |

BM15 dMax20 Total No. of Microsatellites found : 25  
Total No. of Compound Microsatellites found : 2

| No. | Compound SSR   | Start | End |
|-----|----------------|-------|-----|
| 1   | (CT)4-x-1-(T)8 | 154   | 168 |
| 2   | (T)8-x9-(AGG)3 | 401   | 427 |

BM15 dMax30 Total No. of Microsatellites found : 25  
Total No. of Compound Microsatellites found : 2

| No. | Compound SSR            | Start | End |
|-----|-------------------------|-------|-----|
| 1   | (T)6-x29-(CT)4-x-1-(T)8 | 119   | 168 |
| 2   | (T)7-x21-(T)8-x9-(AGG)3 | 373   | 427 |

BM15 dMax40 Total No. of Microsatellites found : 25  
Total No. of Compound Microsatellites found : 2

| No. | Compound SSR                              | Start | End |
|-----|-------------------------------------------|-------|-----|
| 1   | (T)6-x29-(CT)4-x-1-(T)8                   | 119   | 168 |
| 2   | (T)7-x35-(T)7-x21-(T)8-x9-(AGG)3-x39-(G)6 | 331   | 472 |

BM15 dMax50 Total No. of Microsatellites found : 25  
Total No. of Compound Microsatellites found : 4

| No. | Compound SSR                              | Start | End  |
|-----|-------------------------------------------|-------|------|
| 1   | (T)6-x29-(CT)4-x-1-(T)8-x44-(A)10         | 119   | 222  |
| 2   | (T)7-x35-(T)7-x21-(T)8-x9-(AGG)3-x39-(G)6 | 331   | 472  |
| 3   | (GCA)3-x42-(AT)3                          | 1073  | 1129 |
| 4   | (C)6-x47-(AGG)3                           | 4108  | 4169 |

## BM16

BM16 dMax10 Total No. of Microsatellites found : 30  
Total No. of Compound Microsatellites found : 1

| No. | Compound SSR | Start | End  |
|-----|--------------|-------|------|
| 1   | (T)7-x6-(G)7 | 4082  | 4101 |

BM16 dMax20 Total No. of Microsatellites found : 30  
Total No. of Compound Microsatellites found : 1

| No. | Compound SSR | Start | End  |
|-----|--------------|-------|------|
| 1   | (T)7-x6-(G)7 | 4082  | 4101 |

BM16 dMax30 Total No. of Microsatellites found : 30  
Total No. of Compound Microsatellites found : 3

| No. | Compound SSR     | Start | End  |
|-----|------------------|-------|------|
| 1   | (CT)3-x28-(ATG)3 | 1691  | 1734 |

|                  |      |      |
|------------------|------|------|
| 2 (AT)3-x27-(C)7 | 2378 | 2417 |
| 3 (T)7-x6-(G)7   | 4082 | 410  |

BM16 dMax40 Total No. of Microsatellites found : 30  
Total No. of Compound Microsatellites found : 4

| No. | Compound SSR     | Start | End  |
|-----|------------------|-------|------|
| 1   | (CT)3-x28-(ATG)3 | 1691  | 1734 |
| 2   | (AT)3-x27-(C)7   | 2378  | 2417 |
| 3   | (T)7-x6-(G)7     | 4082  | 4101 |
| 4   | (T)6-x39-(T)7    | 4881  | 4932 |

BM16 dMax50 Total No. of Microsatellites found : 30  
Total No. of Compound Microsatellites found : 4

| No. | Compound SSR     | Start | End  |
|-----|------------------|-------|------|
| 1   | (CT)3-x28-(ATG)3 | 1691  | 1734 |
| 2   | (AT)3-x27-(C)7   | 2378  | 2417 |
| 3   | (T)7-x6-(G)7     | 4082  | 4101 |
| 4   | (T)6-x39-(T)7    | 4881  | 4932 |

## BM17

BM17 dMax10 Total No. of Microsatellites found : 35  
Total No. of Compound Microsatellites found : 2

| No. | Compound SSR   | Start | End  |
|-----|----------------|-------|------|
| 1   | (GAA)4-x5-(C)6 | 1303  | 1325 |
| 2   | (G)6-x3-(AT)3  | 1717  | 1731 |

BM17 dMax20 Total No. of Microsatellites found : 35  
Total No. of Compound Microsatellites found : 4

RESULTS: 1 - 4

| No. | Compound SSR   | Start | End  |
|-----|----------------|-------|------|
| 1   | (GAA)4-x5-(C)6 | 1430  | 1452 |
| 2   | (G)6-x3-(AT)3  | 1844  | 1858 |
| 3   | (T)6-x12-(T)6  | 2841  | 2864 |
| 4   | (C)6-x13-(T)6  | 4357  | 4381 |

BM17 dMax30 Total No. of Microsatellites found : 35  
Total No. of Compound Microsatellites found : 5

RESULTS: 1 - 5

| No. | Compound SSR   | Start | End  |
|-----|----------------|-------|------|
| 1   | (GAA)4-x5-(C)6 | 1430  | 1452 |
| 2   | (G)6-x3-(AT)3  | 1844  | 1858 |
| 3   | (T)6-x12-(T)6  | 2841  | 2864 |
| 4   | (T)6-x28-(T)6  | 3281  | 3320 |
| 5   | (C)6-x13-(T)6  | 4357  | 4381 |

BM17 dMax40 Total No. of Microsatellites found : 35  
Total No. of Compound Microsatellites found : 5

RESULTS: 1 - 5

| No. | Compound SSR            | Start | End  |
|-----|-------------------------|-------|------|
| 1   | (GAA)4-x5-(C)6-x34-(A)8 | 1430  | 1494 |
| 2   | (G)6-x3-(AT)3           | 1844  | 1858 |
| 3   | (T)6-x12-(T)6           | 2841  | 2864 |
| 4   | (T)6-x28-(T)6           | 3281  | 3320 |
| 5   | (C)6-x13-(T)6           | 4357  | 4381 |

BM17 dMax50 Total No. of Microsatellites found : 35  
Total No. of Compound Microsatellites found : 5

RESULTS: 1 - 5

| No. | Compound SSR            | Start | End  |
|-----|-------------------------|-------|------|
| 1   | (GAA)4-x5-(C)6-x34-(A)8 | 1430  | 1494 |
| 2   | (G)6-x3-(AT)3           | 1844  | 1858 |
| 3   | (T)6-x12-(T)6           | 2841  | 2864 |
| 4   | (T)6-x28-(T)6           | 3281  | 3320 |
| 5   | (C)6-x13-(T)6           | 4357  | 4381 |

## BM18

BM18 dMax10 Total No. of Microsatellites found : 35  
Total No. of Compound Microsatellites found : 3

| No. | Compound SSR      | Start | End  |
|-----|-------------------|-------|------|
| 1   | (CT)4-x9-(GAG)3   | 115   | 143  |
| 2   | (TATTGT)3-x2-(A)6 | 2575  | 2601 |
| 3   | (TCT)4-x7-(GTG)5  | 4273  | 4306 |

BM18 dMax20 Total No. of Microsatellites found : 35  
Total No. of Compound Microsatellites found : 4

| No. | Compound SSR       | Start | End  |
|-----|--------------------|-------|------|
| 1   | (CT)4-x9-(GAG)3    | 115   | 143  |
| 2   | (TATTGT)3-x2-(A)6  | 2575  | 2601 |
| 3   | (CTCTGG)4-x16-(G)6 | 4204  | 4249 |
| 4   | (TCT)4-x7-(GTG)5   | 4273  | 4306 |

BM18 dMax30 Total No. of Microsatellites found : 35  
Total No. of Compound Microsatellites found : 6

| No. | Compound SSR                            | Start | End  |
|-----|-----------------------------------------|-------|------|
| 1   | (CT)4-x9-(GAG)3                         | 115   | 143  |
| 2   | (TTA)3-x20-(G)6                         | 931   | 966  |
| 3   | (TATTGT)3-x2-(A)6                       | 2575  | 2601 |
| 4   | (A)6-x29-(T)8                           | 4093  | 4135 |
| 5   | (CTCTGG)4-x16-(G)6-x23-(TCT)4-x7-(GTG)5 | 4204  | 4306 |
| 6   | (T)8-x25-(T)6                           | 4672  | 4710 |

BM18 dMax40 Total No. of Microsatellites found : 35  
Total No. of Compound Microsatellites found : 7

| No. | Compound SSR                            | Start | End  |
|-----|-----------------------------------------|-------|------|
| 1   | (CT)4-x9-(GAG)3-x30-(A)6                | 115   | 179  |
| 2   | (T)6-x31-(G)6                           | 481   | 523  |
| 3   | (TTA)3-x20-(G)6                         | 931   | 966  |
| 4   | (TATTGT)3-x2-(A)6                       | 2575  | 2601 |
| 5   | (A)6-x29-(T)8                           | 4093  | 4135 |
| 6   | (CTCTGG)4-x16-(G)6-x23-(TCT)4-x7-(GTG)5 | 4204  | 4306 |
| 7   | (T)8-x25-(T)6                           | 4672  | 4710 |

BM18 dMax50 Total No. of Microsatellites found : 35  
Total No. of Compound Microsatellites found : 8

| No. | Compound SSR                                     | Start | End  |
|-----|--------------------------------------------------|-------|------|
| 1   | (CT)4-x9-(GAG)3-x30-(A)6                         | 115   | 179  |
| 2   | (T)6-x31-(G)6                                    | 481   | 523  |
| 3   | (TTA)3-x20-(G)6                                  | 931   | 966  |
| 4   | (AGA)4-x40-(A)6                                  | 1438  | 1496 |
| 5   | (TATTGT)3-x2-(A)6                                | 2575  | 2601 |
| 6   | (A)6-x29-(T)8                                    | 4093  | 4135 |
| 7   | (CTCTGG)4-x16-(G)6-x23-(TCT)4-x7-(GTG)5-x42-(A)6 | 4204  | 4354 |
| 8   | (T)8-x25-(T)6                                    | 4672  | 4710 |

## BM19

BM19 dMax10 Total No. of Microsatellites found : 24  
 Total No. of Compound Microsatellites found : 1

| No. | Compound SSR               | Start | End  |
|-----|----------------------------|-------|------|
| 1   | (AG)3-x1-(CCA)3-x-1-(AGG)4 | 1183  | 1210 |

BM19 dMax20 Total No. of Microsatellites found : 24  
 Total No. of Compound Microsatellites found : 2

| No. | Compound SSR               | Start | End  |
|-----|----------------------------|-------|------|
| 1   | (AG)3-x1-(CCA)3-x-1-(AGG)4 | 1183  | 1210 |
| 2   | (AT)3-x12-(CT)3            | 4419  | 4442 |

BM19 dMax30 Total No. of Microsatellites found : 24  
 Total No. of Compound Microsatellites found : 3

| No. | Compound SSR               | Start | End  |
|-----|----------------------------|-------|------|
| 1   | (CA)3-x28-(GCAA)3          | 145   | 189  |
| 2   | (AG)3-x1-(CCA)3-x-1-(AGG)4 | 1183  | 1210 |
| 3   | (AT)3-x12-(CT)3            | 4419  | 4442 |

BM19 dMax40 Total No. of Microsatellites found : 24  
 Total No. of Compound Microsatellites found : 6

| No. | Compound SSR               | Start | End  |
|-----|----------------------------|-------|------|
| 1   | (AG)3-x36-(GAG)4           | 35    | 88   |
| 2   | (CA)3-x28-(GCAA)3          | 145   | 189  |
| 3   | (G)6-x34-(T)6              | 782   | 827  |
| 4   | (ATC)3-x31-(C)9            | 1007  | 1055 |
| 5   | (AG)3-x1-(CCA)3-x-1-(AGG)4 | 1183  | 1210 |
| 6   | (AT)3-x12-(CT)3            | 4419  | 4442 |

BM19 dMax50 Total No. of Microsatellites found : 24  
 Total No. of Compound Microsatellites found : 6

| No. | Compound SSR               | Start | End  |
|-----|----------------------------|-------|------|
| 1   | (AG)3-x36-(GAG)4           | 35    | 88   |
| 2   | (CA)3-x28-(GCAA)3          | 145   | 189  |
| 3   | (G)6-x34-(T)6              | 782   | 827  |
| 4   | (ATC)3-x31-(C)9            | 1007  | 1055 |
| 5   | (AG)3-x1-(CCA)3-x-1-(AGG)4 | 1183  | 1210 |
| 6   | (AT)3-x12-(CT)3            | 4419  | 4442 |

## BM20

BM20 dMax10 Total No. of Microsatellites found : 29  
 Total No. of Compound Microsatellites found : 3

| No. | Compound SSR    | Start | End  |
|-----|-----------------|-------|------|
| 1   | (CT)3-x2-(TAA)3 | 3239  | 3255 |
| 2   | (TG)3-x1-(TCT)4 | 4144  | 4162 |
| 3   | (A)7-x3-(ACTA)3 | 4299  | 4320 |

BM20 dMax20 Total No. of Microsatellites found : 29  
 Total No. of Compound Microsatellites found : 3

| No. | Compound SSR    | Start | End  |
|-----|-----------------|-------|------|
| 1   | (CT)3-x2-(TAA)3 | 3239  | 3255 |
| 2   | (TG)3-x1-(TCT)4 | 4144  | 4162 |
| 3   | (A)7-x3-(ACTA)3 | 4299  | 4320 |

BM20 dMax30 Total No. of Microsatellites found : 29  
 Total No. of Compound Microsatellites found : 4

| No. | Compound SSR    | Start | End  |
|-----|-----------------|-------|------|
| 1   | (CT)3-x2-(TAA)3 | 3239  | 3255 |
| 2   | (TG)3-x1-(TCT)4 | 4144  | 4162 |
| 3   | (A)7-x3-(ACTA)3 | 4299  | 4320 |
| 4   | (T)6-x28-(T)6   | 4749  | 4788 |

|             |                                                 |       |      |
|-------------|-------------------------------------------------|-------|------|
| BM20 dMax40 | Total No. of Microsatellites found : 29         |       |      |
|             | Total No. of Compound Microsatellites found : 6 |       |      |
| No.         | Compound SSR                                    | Start | End  |
|             | 1 (AAG)3-x36-(AT)3                              | 411   | 461  |
|             | 2 (AC)3-x31-(CA)3                               | 1557  | 1599 |
|             | 3 (CT)3-x2-(TAA)3                               | 3239  | 3255 |
|             | 4 (TG)3-x1-(TCT)4                               | 4144  | 4162 |
|             | 5 (A)7-x3-(ACTA)3                               | 4299  | 4320 |
|             | 6 (T)6-x28-(T)6                                 | 4749  | 4788 |

|             |                                                 |       |      |
|-------------|-------------------------------------------------|-------|------|
| BM20 dMax50 | Total No. of Microsatellites found : 29         |       |      |
|             | Total No. of Compound Microsatellites found : 7 |       |      |
| No.         | Compound SSR                                    | Start | End  |
|             | 1 (T)7-x44-(A)7                                 | 71    | 128  |
|             | 2 (AAG)3-x36-(AT)3                              | 411   | 461  |
|             | 3 (AC)3-x31-(CA)3-x48-(G)6                      | 1557  | 1653 |
|             | 4 (CT)3-x2-(TAA)3                               | 3239  | 3255 |
|             | 5 (TG)3-x1-(TCT)4                               | 4144  | 4162 |
|             | 6 (A)7-x3-(ACTA)3                               | 4299  | 4320 |
|             | 7 (T)6-x28-(T)6                                 | 4749  | 4788 |

## BM21

BM21 dMax10 Total No. of Microsatellites found : 18  
Total No. of Compound Microsatellites found : 0

BM21 dMax20 Total No. of Microsatellites found : 18  
Total No. of Compound Microsatellites found : 0

BM21 dMax30 Total No. of Microsatellites found : 18  
Total No. of Compound Microsatellites found : 0

|             |                                                 |       |      |
|-------------|-------------------------------------------------|-------|------|
| BM21 dMax40 | Total No. of Microsatellites found : 18         |       |      |
|             | Total No. of Compound Microsatellites found : 1 |       |      |
| No.         | Compound SSR                                    | Start | End  |
|             | 1 (A)7-x34-(TG)4                                | 2535  | 2583 |

|             |                                                 |       |      |
|-------------|-------------------------------------------------|-------|------|
| BM21 dMax50 | Total No. of Microsatellites found : 18         |       |      |
|             | Total No. of Compound Microsatellites found : 2 |       |      |
| No.         | Compound SSR                                    | Start | End  |
|             | 1 (GAA)4-x40-(C)7-x45-(GGA)7                    | 1056  | 1180 |
|             | 2 (A)7-x34-(TG)4                                | 2535  | 2583 |

## BM22

BM22 dMax10 Total No. of Microsatellites found : 37  
Total No. of Compound Microsatellites found : 2

|     |                   |       |      |
|-----|-------------------|-------|------|
| No. | Compound SSR      | Start | End  |
|     | 1 (T)12-x6-(G)6   | 420   | 443  |
|     | 2 (T)6-x1-(CCAC)3 | 4660  | 4678 |

BM22 dMax20 Total No. of Microsatellites found : 37  
Total No. of Compound Microsatellites found : 4

|     |                    |       |      |
|-----|--------------------|-------|------|
| No. | Compound SSR       | Start | End  |
|     | 1 (A)7-x12-(CT)3   | 84    | 108  |
|     | 2 (T)12-x6-(G)6    | 420   | 443  |
|     | 3 (CT)3-x17-(CTC)3 | 4134  | 4165 |
|     | 4 (T)6-x1-(CCAC)3  | 4660  | 4678 |

BM22 dMax30 Total No. of Microsatellites found : 37  
Total No. of Compound Microsatellites found : 5

| No. | Compound SSR     | Start | End  |
|-----|------------------|-------|------|
| 1   | (A)7-x12-(CT)3   | 84    | 108  |
| 2   | (T)12-x6-(G)6    | 420   | 443  |
| 3   | (G)6-x27-(T)6    | 2834  | 2872 |
| 4   | (CT)3-x17-(CTC)3 | 4134  | 4165 |
| 5   | (T)6-x1-(CCAC)3  | 4660  | 4678 |

BM22 dMax40 Total No. of Microsatellites found : 37  
Total No. of Compound Microsatellites found : 5

| No. | Compound SSR                                      | Start | End  |
|-----|---------------------------------------------------|-------|------|
| 1   | (A)7-x12-(CT)3                                    | 84    | 108  |
| 2   | (T)7-x37-(T)6-x39-(T)8-x35-(T)7-x38-(T)12-x6-(G)6 | 243   | 443  |
| 3   | (G)6-x27-(T)6                                     | 2834  | 2872 |
| 4   | (CT)3-x17-(CTC)3                                  | 4134  | 4165 |
| 5   | (T)6-x1-(CCAC)3                                   | 4660  | 4678 |

BM22 dMax50 Total No. of Microsatellites found : 37  
Total No. of Compound Microsatellites found : 5

| No. | Compound SSR                                      | Start | End  |
|-----|---------------------------------------------------|-------|------|
| 1   | (A)7-x12-(CT)3                                    | 84    | 108  |
| 2   | (T)7-x37-(T)6-x39-(T)8-x35-(T)7-x38-(T)12-x6-(G)6 | 243   | 443  |
| 3   | (G)6-x27-(T)6                                     | 2834  | 2872 |
| 4   | (CT)3-x17-(CTC)3                                  | 4134  | 4165 |
| 5   | (T)6-x1-(CCAC)3                                   | 4660  | 4678 |

## BM23

BM23 dMax10 Total No. of Microsatellites found : 26  
Total No. of Compound Microsatellites found : 2

| No. | Compound SSR    | Start | End |
|-----|-----------------|-------|-----|
| 1   | (CCT)3-x-1-(T)7 | 68    | 83  |
| 2   | (CCT)3-x5-(A)8  | 113   | 134 |

BM23 dMax20 Total No. of Microsatellites found : 26  
Total No. of Compound Microsatellites found : 4

| No. | Compound SSR     | Start | End  |
|-----|------------------|-------|------|
| 1   | (CCT)3-x-1-(T)7  | 68    | 83   |
| 2   | (CCT)3-x5-(A)8   | 113   | 134  |
| 3   | (CT)3-x16-(T)6   | 2580  | 2607 |
| 4   | (GT)6-x12-(ACG)4 | 4010  | 4044 |

BM23 dMax30 Total No. of Microsatellites found : 26  
Total No. of Compound Microsatellites found : 4

| No. | Compound SSR                        | Start | End  |
|-----|-------------------------------------|-------|------|
| 1   | (CCT)3-x-1-(T)7-x29-(CCT)3-x5-(A)8  | 68    | 134  |
| 2   | (AT)3-x28-(C)8                      | 2262  | 2303 |
| 3   | (AAG)3-x28-(CT)3-x16-(T)6           | 2543  | 2607 |
| 4   | (T)6-x27-(CT)4-x23-(GT)6-x12-(ACG)4 | 3946  | 4044 |

BM23 dMax40 Total No. of Microsatellites found : 26  
Total No. of Compound Microsatellites found : 4

| No. | Compound SSR                        | Start | End  |
|-----|-------------------------------------|-------|------|
| 1   | (CCT)3-x-1-(T)7-x29-(CCT)3-x5-(A)8  | 68    | 134  |
| 2   | (AT)3-x28-(C)8-x39-(TAAA)3          | 2262  | 2353 |
| 3   | (AAG)3-x28-(CT)3-x16-(T)6           | 2543  | 2607 |
| 4   | (T)6-x27-(CT)4-x23-(GT)6-x12-(ACG)4 | 3946  | 4044 |

BM23 dMax50 Total No. of Microsatellites found : 26  
Total No. of Compound Microsatellites found : 4

| No. | Compound SSR                        | Start | End  |
|-----|-------------------------------------|-------|------|
| 1   | (CCT)3-x-1-(T)7-x29-(CCT)3-x5-(A)8  | 68    | 134  |
| 2   | (AT)3-x28-(C)8-x39-(TAAA)3          | 2262  | 2353 |
| 3   | (T)6-x43-(AAG)3-x28-(CT)3-x16-(T)6  | 2494  | 2607 |
| 4   | (T)6-x27-(CT)4-x23-(GT)6-x12-(ACG)4 | 3946  | 4044 |

## BM24

BM24 dMax10 Total No. of Microsatellites found : 34  
Total No. of Compound Microsatellites found : 0

BM24 dMax20 Total No. of Microsatellites found : 34  
Total No. of Compound Microsatellites found : 2

| No. | Compound SSR     | Start | End  |
|-----|------------------|-------|------|
| 1   | (GCCT)3-x13-(A)8 | 106   | 137  |
| 2   | (T)6-x13-(CA)3   | 3537  | 3561 |

BM24 dMax30 Total No. of Microsatellites found : 34  
Total No. of Compound Microsatellites found : 3

| No. | Compound SSR                | Start | End  |
|-----|-----------------------------|-------|------|
| 1   | (CCT)3-x27-(GCCT)3-x13-(A)8 | 69    | 137  |
| 2   | (TG)3-x21-(TG)3             | 1060  | 1092 |
| 3   | (T)6-x13-(CA)3              | 3537  | 3561 |

BM24 dMax40 Total No. of Microsatellites found : 34  
Total No. of Compound Microsatellites found : 4

| No. | Compound SSR                          | Start | End  |
|-----|---------------------------------------|-------|------|
| 1   | (GC)3-x37-(CCT)3-x27-(GCCT)3-x13-(A)8 | 26    | 137  |
| 2   | (TG)3-x21-(TG)3                       | 1060  | 1092 |
| 3   | (TC)3-x38-(T)6                        | 2984  | 3033 |
| 4   | (T)6-x13-(CA)3                        | 3537  | 3561 |

BM24 dMax50 Total No. of Microsatellites found : 34  
Total No. of Compound Microsatellites found : 5

| No. | Compound SSR                          | Start | End  |
|-----|---------------------------------------|-------|------|
| 1   | (GC)3-x37-(CCT)3-x27-(GCCT)3-x13-(A)8 | 26    | 137  |
| 2   | (TG)3-x21-(TG)3                       | 1060  | 1092 |
| 3   | (GAA)4-x44-(AGAT)3                    | 2098  | 2166 |
| 4   | (TC)3-x38-(T)6                        | 2984  | 3033 |
| 5   | (T)6-x13-(CA)3                        | 3537  | 3561 |

## BM25

BM25 dMax10 Total No. of Microsatellites found : 37  
Total No. of Compound Microsatellites found : 1

| No. | Compound SSR | Start | End  |
|-----|--------------|-------|------|
| 1   | (C)6-x6-(A)9 | 4805  | 4825 |

BM25 dMax20 Total No. of Microsatellites found : 37  
Total No. of Compound Microsatellites found : 5

| No. | Compound SSR | Start | End |
|-----|--------------|-------|-----|
|-----|--------------|-------|-----|

|                   |      |      |
|-------------------|------|------|
| 1 (CCT)4-x17-(C)6 | 1058 | 1093 |
| 2 (C)6-x6-(A)9    | 4805 | 4825 |
| 3 (CTC)4-x10-(A)7 | 4848 | 4875 |
| 4 (A)8-x13-(TC)3  | 4900 | 4926 |
| 5 (A)7-x14-(CTC)5 | 4993 | 5027 |

BM25 dMax30 Total No. of Microsatellites found : 37  
Total No. of Compound Microsatellites found : 5

| No. | Compound SSR                                                 | Start | End  |
|-----|--------------------------------------------------------------|-------|------|
| 1   | (CCT)4-x17-(C)6                                              | 1058  | 1093 |
| 2   | (C)7-x25-(G)6                                                | 1203  | 1240 |
| 3   | (TGTA)3-x24-(TA)3                                            | 1579  | 1619 |
| 4   | (C)6-x6-(A)9-x22-(CTC)4-x10-(A)7-x24-(A)8-x13-(TC)3-x23-(A)7 | 4805  | 4956 |
| 5   | (A)7-x14-(CTC)5                                              | 4993  | 5027 |

BM25 dMax40 Total No. of Microsatellites found : 37  
Total No. of Compound Microsatellites found : 5

| No. | Compound SSR                                                   | Start | End  |
|-----|----------------------------------------------------------------|-------|------|
| 1   | (CCT)4-x17-(C)6                                                | 1058  | 1093 |
| 2   | (C)7-x25-(G)6                                                  | 1203  | 1240 |
| 3   | (TA)6-x34-(AG)3                                                | 1402  | 1452 |
| 4   | (TGTA)3-x24-(TA)3                                              | 1579  | 1619 |
| 5   | (C)6-x6-(A)9-x22-(CTC)4-x10-(A)7-x24-(A)8-x13-(TC)3-x23-(A)7-x | 4805  | 5027 |

BM25 dMax50 Total No. of Microsatellites found : 37  
Total No. of Compound Microsatellites found : 5

| No. | Compound SSR                                                   | Start | End  |
|-----|----------------------------------------------------------------|-------|------|
| 1   | (CCT)4-x17-(C)6                                                | 1058  | 1093 |
| 2   | (C)7-x25-(G)6                                                  | 1203  | 1240 |
| 3   | (TA)6-x34-(AG)3                                                | 1402  | 1452 |
| 4   | (TGTA)3-x24-(TA)3                                              | 1579  | 1619 |
| 5   | (C)6-x6-(A)9-x22-(CTC)4-x10-(A)7-x24-(A)8-x13-(TC)3-x23-(A)7-x | 4805  | 5027 |

## BM26

BM26 dMax10 Total No. of Microsatellites found : 32  
Total No. of Compound Microsatellites found : 2

| No. | Compound SSR  | Start | End  |
|-----|---------------|-------|------|
| 1   | (A)6-x5-(GA)3 | 1308  | 1324 |
| 2   | (A)8-x0-(GA)3 | 5172  | 5185 |

BM26 dMax20 Total No. of Microsatellites found : 32  
Total No. of Compound Microsatellites found : 2

| No. | Compound SSR  | Start | End  |
|-----|---------------|-------|------|
| 1   | (A)6-x5-(GA)3 | 1308  | 1324 |
| 2   | (A)8-x0-(GA)3 | 5172  | 5185 |

BM26 dMax30 Total No. of Microsatellites found : 32  
Total No. of Compound Microsatellites found : 5

| No. | Compound SSR                | Start | End  |
|-----|-----------------------------|-------|------|
| 1   | (CCCT)3-x20-(G)6            | 1212  | 1248 |
| 2   | (A)6-x5-(GA)3               | 1308  | 1324 |
| 3   | (GA)3-x25-(AGA)4-x20-(TAT)4 | 2559  | 2632 |
| 4   | (A)8-x24-(A)7               | 4905  | 4943 |
| 5   | (A)8-x0-(GA)3               | 5172  | 5185 |

BM26 dMax40 Total No. of Microsatellites found : 32  
Total No. of Compound Microsatellites found : 6

| No. | Compound SSR                | Start | End  |
|-----|-----------------------------|-------|------|
| 1   | (CCCT)3-x20-(G)6            | 1212  | 1248 |
| 2   | (A)6-x5-(GA)3               | 1308  | 1324 |
| 3   | (GA)3-x25-(AGA)4-x20-(TAT)4 | 2559  | 2632 |
| 4   | (T)6-x37-(G)6               | 2960  | 3008 |
| 5   | (A)8-x24-(A)7               | 4905  | 4943 |
| 6   | (A)8-x0-(GA)3               | 5172  | 5185 |

BM26 dMax50 Total No. of Microsatellites found : 32  
Total No. of Compound Microsatellites found : 6

| No. | Compound SSR                | Start | End  |
|-----|-----------------------------|-------|------|
| 1   | (CCCT)3-x20-(G)6            | 1212  | 1248 |
| 2   | (A)6-x5-(GA)3               | 1308  | 1324 |
| 3   | (GA)3-x25-(AGA)4-x20-(TAT)4 | 2559  | 2632 |
| 4   | (T)6-x37-(G)6               | 2960  | 3008 |
| 5   | (A)8-x24-(A)7-x40-(A)7      | 4905  | 4990 |
| 6   | (T)6-x46-(A)8-x0-(GA)3      | 5120  | 5185 |

## BM27

BM27 dMax10 Total No. of Microsatellites found : 39  
Total No. of Compound Microsatellites found : 2

| No. | Compound SSR           | Start | End  |
|-----|------------------------|-------|------|
| 1   | (TA)3-x2-(A)6          | 4136  | 4149 |
| 2   | (A)6-x6-(GAG)4-x1-(G)6 | 4438  | 4468 |

BM27 dMax20 Total No. of Microsatellites found : 39  
Total No. of Compound Microsatellites found : 5

| No. | Compound SSR            | Start | End  |
|-----|-------------------------|-------|------|
| 1   | (CCT)4-x11-(A)7         | 122   | 152  |
| 2   | (T)6-x12-(T)6           | 392   | 415  |
| 3   | (AGA)5-x15-(GAG)3       | 1486  | 1524 |
| 4   | (TA)3-x2-(A)6-x16-(TA)6 | 4136  | 4176 |
| 5   | (A)6-x6-(GAG)4-x1-(G)6  | 4438  | 4468 |

BM27 dMax30 Total No. of Microsatellites found : 39  
Total No. of Compound Microsatellites found : 6

| No. | Compound SSR                      | Start | End  |
|-----|-----------------------------------|-------|------|
| 1   | (CCT)3-x29-(CCT)4-x11-(A)7        | 83    | 152  |
| 2   | (T)6-x12-(T)6                     | 392   | 415  |
| 3   | (TA)3-x20-(AG)3                   | 1197  | 1228 |
| 4   | (AGA)5-x15-(GAG)3                 | 1486  | 1524 |
| 5   | (TA)3-x2-(A)6-x16-(TA)6           | 4136  | 4176 |
| 6   | (GAA)4-x27-(A)6-x6-(GAG)4-x1-(G)6 | 4399  | 4468 |

BM27 dMax40 Total No. of Microsatellites found : 39  
Total No. of Compound Microsatellites found : 6

| No. | Compound SSR                      | Start | End  |
|-----|-----------------------------------|-------|------|
| 1   | (CCT)3-x29-(CCT)4-x11-(A)7        | 83    | 152  |
| 2   | (T)6-x12-(T)6                     | 392   | 415  |
| 3   | (TA)3-x20-(AG)3                   | 1197  | 1228 |
| 4   | (AGA)5-x15-(GAG)3                 | 1486  | 1524 |
| 5   | (T)6-x30-(TA)3-x2-(A)6-x16-(TA)6  | 4100  | 4176 |
| 6   | (GAA)4-x27-(A)6-x6-(GAG)4-x1-(G)6 | 4399  | 4468 |

BM27 dMax50 Total No. of Microsatellites found : 39  
 Total No. of Compound Microsatellites found : 6

| No. | Compound SSR                      | Start | End  |
|-----|-----------------------------------|-------|------|
| 1   | (CCT)3-x29-(CCT)4-x11-(A)7        | 83    | 152  |
| 2   | (T)6-x12-(T)6                     | 392   | 415  |
| 3   | (TA)3-x20-(AG)3                   | 1197  | 1228 |
| 4   | (AGA)5-x15-(GAG)3                 | 1486  | 1524 |
| 5   | (T)6-x30-(TA)3-x2-(A)6-x16-(TA)6  | 4100  | 4176 |
| 6   | (GAA)4-x27-(A)6-x6-(GAG)4-x1-(G)6 | 4399  | 4468 |

## BM28

BM28 dMax10 Total No. of Microsatellites found : 34  
 Total No. of Compound Microsatellites found : 3

| No. | Compound SSR          | Start | End  |
|-----|-----------------------|-------|------|
| 1   | (T)7-x5-(T)6          | 574   | 591  |
| 2   | (T)6-x6-(T)6          | 3727  | 3744 |
| 3   | (A)11-x7-(T)6-x3-(A)6 | 4691  | 4723 |

BM28 dMax20 Total No. of Microsatellites found : 34  
 Total No. of Compound Microsatellites found : 5

| No. | Compound SSR          | Start | End  |
|-----|-----------------------|-------|------|
| 1   | (T)7-x5-(T)6          | 574   | 591  |
| 2   | (AGA)5-x15-(GAG)4     | 1504  | 1544 |
| 3   | (T)6-x6-(T)6          | 3727  | 3744 |
| 4   | (A)6-x19-(G)6         | 4454  | 4484 |
| 5   | (A)11-x7-(T)6-x3-(A)6 | 4691  | 4723 |

BM28 dMax30 Total No. of Microsatellites found : 34  
 Total No. of Compound Microsatellites found : 6

| No. | Compound SSR             | Start | End  |
|-----|--------------------------|-------|------|
| 1   | (T)7-x5-(T)6             | 574   | 591  |
| 2   | (AGA)5-x15-(GAG)4        | 1504  | 1544 |
| 3   | (T)7-x22-(T)6            | 2350  | 2384 |
| 4   | (T)6-x6-(T)6             | 3727  | 3744 |
| 5   | (GAA)4-x27-(A)6-x19-(G)6 | 4415  | 4484 |
| 6   | (A)11-x7-(T)6-x3-(A)6    | 4691  | 4723 |

BM28 dMax40 Total No. of Microsatellites found : 34  
 Total No. of Compound Microsatellites found : 7

| No. | Compound SSR               | Start | End  |
|-----|----------------------------|-------|------|
| 1   | (T)7-x5-(T)6               | 574   | 591  |
| 2   | (AGA)5-x15-(GAG)4-x38-(A)7 | 1504  | 1589 |
| 3   | (T)7-x22-(T)6              | 2350  | 2384 |
| 4   | (T)8-x32-(TC)3             | 3127  | 3172 |
| 5   | (T)6-x6-(T)6               | 3727  | 3744 |
| 6   | (GAA)4-x27-(A)6-x19-(G)6   | 4415  | 4484 |
| 7   | (A)11-x7-(T)6-x3-(A)6      | 4691  | 4723 |

BM28 dMax50 Total No. of Microsatellites found : 34  
 Total No. of Compound Microsatellites found : 7

| No. | Compound SSR               | Start | End  |
|-----|----------------------------|-------|------|
| 1   | (T)7-x5-(T)6               | 574   | 591  |
| 2   | (AGA)5-x15-(GAG)4-x38-(A)7 | 1504  | 1589 |
| 3   | (T)7-x22-(T)6              | 2350  | 2384 |
| 4   | (T)8-x32-(TC)3             | 3127  | 3172 |
| 5   | (T)6-x6-(T)6               | 3727  | 3744 |
| 6   | (GAA)4-x27-(A)6-x19-(G)6   | 4415  | 4484 |

7 (A)11-x7-(T)6-x3-(A)6 4691 4723

## BM29

BM29 dMax10 Total No. of Microsatellites found : 36  
Total No. of Compound Microsatellites found : 1

| No. | Compound SSR     | Start | End |
|-----|------------------|-------|-----|
| 1   | (CTT)3-x0-(TTA)3 | 898   | 917 |

BM29 dMax20 Total No. of Microsatellites found : 36  
Total No. of Compound Microsatellites found : 1

| No. | Compound SSR     | Start | End |
|-----|------------------|-------|-----|
| 1   | (CTT)3-x0-(TTA)3 | 898   | 917 |

BM29 dMax30 Total No. of Microsatellites found : 36  
Total No. of Compound Microsatellites found : 5

| No. | Compound SSR                          | Start | End  |
|-----|---------------------------------------|-------|------|
| 1   | (GC)3-x25-(G)6                        | 464   | 500  |
| 2   | (CTT)3-x0-(TTA)3                      | 898   | 917  |
| 3   | (A)6-x20-(TCC)4                       | 3910  | 3946 |
| 4   | (A)6-x28-(GT)3-x22-(G)6-x28-(TCAGGC)3 | 4082  | 4195 |
| 5   | (C)6-x23-(T)8                         | 4559  | 4595 |

BM29 dMax40 Total No. of Microsatellites found : 36  
Total No. of Compound Microsatellites found : 6

| No. | Compound SSR                          | Start | End  |
|-----|---------------------------------------|-------|------|
| 1   | (GA)6-x35-(A)7                        | 127   | 179  |
| 2   | (GC)3-x25-(G)6                        | 464   | 500  |
| 3   | (CCT)3-x33-(CTT)3-x0-(TTA)3           | 855   | 917  |
| 4   | (A)6-x20-(TCC)4                       | 3910  | 3946 |
| 5   | (A)6-x28-(GT)3-x22-(G)6-x28-(TCAGGC)3 | 4082  | 4195 |
| 6   | (C)6-x23-(T)8                         | 4559  | 4595 |

BM29 dMax50 Total No. of Microsatellites found : 36  
Total No. of Compound Microsatellites found : 8

| No. | Compound SSR                          | Start | End  |
|-----|---------------------------------------|-------|------|
| 1   | (GA)6-x35-(A)7                        | 127   | 179  |
| 2   | (GC)3-x25-(G)6                        | 464   | 500  |
| 3   | (CCT)3-x33-(CTT)3-x0-(TTA)3           | 855   | 917  |
| 4   | (AGA)4-x43-(A)8                       | 1424  | 1487 |
| 5   | (C)6-x44-(TG)3                        | 2527  | 2582 |
| 6   | (A)6-x20-(TCC)4                       | 3910  | 3946 |
| 7   | (A)6-x28-(GT)3-x22-(G)6-x28-(TCAGGC)3 | 4082  | 4195 |
| 8   | (C)6-x23-(T)8-x48-(CT)3               | 4559  | 4649 |

## BM30

BM30 dMax10 Total No. of Microsatellites found : 32  
Total No. of Compound Microsatellites found : 2

| No. | Compound SSR   | Start | End  |
|-----|----------------|-------|------|
| 1   | (TA)3-x6-(A)6  | 180   | 197  |
| 2   | (AGA)4-x3-(C)7 | 1422  | 1442 |

BM30 dMax20 Total No. of Microsatellites found : 32  
Total No. of Compound Microsatellites found : 4

| No. | Compound SSR       | Start | End  |
|-----|--------------------|-------|------|
| 1   | (TA)3-x6-(A)6      | 180   | 197  |
| 2   | (AT)3-x13-(AAGAC)3 | 982   | 1014 |

|                  |      |      |
|------------------|------|------|
| 3 (AGA)4-x3-(C)7 | 1422 | 1442 |
| 4 (T)18-x15-(T)7 | 4554 | 4593 |

BM30 dMax30 Total No. of Microsatellites found : 32  
Total No. of Compound Microsatellites found : 6

| No. | Compound SSR       | Start | End  |
|-----|--------------------|-------|------|
| 1   | (TA)3-x6-(A)6      | 180   | 197  |
| 2   | (AT)3-x13-(AAGAC)3 | 982   | 1014 |
| 3   | (AGA)4-x3-(C)7     | 1422  | 1442 |
| 4   | (T)8-x28-(T)7      | 3259  | 3301 |
| 5   | (TA)4-x25-(TA)3    | 4027  | 4065 |
| 6   | (T)18-x15-(T)7     | 4554  | 4593 |

BM30 dMax40 Total No. of Microsatellites found : 32  
Total No. of Compound Microsatellites found : 7

| No. | Compound SSR            | Start | End  |
|-----|-------------------------|-------|------|
| 1   | (CT)6-x38-(TA)3-x6-(A)6 | 131   | 197  |
| 2   | (AT)3-x13-(AAGAC)3      | 982   | 1014 |
| 3   | (AGA)4-x3-(C)7-x33-(A)6 | 1422  | 1481 |
| 4   | (AG)3-x39-(A)7          | 3143  | 3194 |
| 5   | (T)8-x28-(T)7           | 3259  | 3301 |
| 6   | (TA)4-x25-(TA)3         | 4027  | 4065 |
| 7   | (T)18-x15-(T)7          | 4554  | 4593 |

BM30 dMax50 Total No. of Microsatellites found : 32  
Total No. of Compound Microsatellites found : 8

| No. | Compound SSR            | Start | End  |
|-----|-------------------------|-------|------|
| 1   | (CT)6-x38-(TA)3-x6-(A)6 | 131   | 197  |
| 2   | (AT)3-x13-(AAGAC)3      | 982   | 1014 |
| 3   | (AGA)4-x3-(C)7-x33-(A)6 | 1422  | 1481 |
| 4   | (AG)3-x39-(A)7          | 3143  | 3194 |
| 5   | (T)8-x28-(T)7           | 3259  | 3301 |
| 6   | (TA)4-x25-(TA)3         | 4027  | 4065 |
| 7   | (T)18-x15-(T)7          | 4554  | 4593 |
| 8   | (AGA)3-x41-(T)6         | 4737  | 4792 |

## BM31

BM31 dMax10 Total No. of Microsatellites found : 31  
Total No. of Compound Microsatellites found : 1

| No. | Compound SSR                      | Start | End  |
|-----|-----------------------------------|-------|------|
| 1   | (TTA)4-x-3-(T)9-x4-(CTG)3-x1-(T)6 | 4649  | 4687 |

BM31 dMax20 Total No. of Microsatellites found : 31  
Total No. of Compound Microsatellites found : 3

| No. | Compound SSR                      | Start | End  |
|-----|-----------------------------------|-------|------|
| 1   | (AT)3-x18-(GT)3                   | 1847  | 1876 |
| 2   | (ATAC)3-x16-(T)7                  | 4089  | 4123 |
| 3   | (TTA)4-x-3-(T)9-x4-(CTG)3-x1-(T)6 | 4649  | 4687 |

BM31 dMax30 Total No. of Microsatellites found : 31  
Total No. of Compound Microsatellites found : 4

| No. | Compound SSR                      | Start | End  |
|-----|-----------------------------------|-------|------|
| 1   | (T)6-x28-(G)6-x20-(AT)3           | 459   | 524  |
| 2   | (AT)3-x18-(GT)3                   | 1847  | 1876 |
| 3   | (ATAC)3-x16-(T)7                  | 4089  | 4123 |
| 4   | (TTA)4-x-3-(T)9-x4-(CTG)3-x1-(T)6 | 4649  | 4687 |

BM31 dMax40 Total No. of Microsatellites found : 31  
Total No. of Compound Microsatellites found : 6

| No. | Compound SSR | Start | End |
|-----|--------------|-------|-----|
|-----|--------------|-------|-----|

|             |                                                 |       |      |
|-------------|-------------------------------------------------|-------|------|
|             | 1 (T)6-x28-(G)6-x20-(AT)3                       | 459   | 524  |
|             | 2 (AGA)4-x35-(A)7                               | 1434  | 1488 |
|             | 3 (AT)3-x18-(GT)3                               | 1847  | 1876 |
|             | 4 (T)7-x37-(TA)3                                | 3592  | 3641 |
|             | 5 (ATAC)3-x16-(T)7                              | 4089  | 4123 |
|             | 6 (TTA)4-x-3-(T)9-x4-(CTG)3-x1-(T)6             | 4649  | 4687 |
| BM31 dMax50 | Total No. of Microsatellites found : 31         |       |      |
|             | Total No. of Compound Microsatellites found : 6 |       |      |
| No.         | Compound SSR                                    | Start | End  |
|             | 1 (T)6-x28-(G)6-x20-(AT)3                       | 459   | 524  |
|             | 2 (AGA)4-x35-(A)7                               | 1434  | 1488 |
|             | 3 (AT)3-x18-(GT)3                               | 1847  | 1876 |
|             | 4 (T)7-x37-(TA)3                                | 3592  | 3641 |
|             | 5 (ATAC)3-x16-(T)7                              | 4089  | 4123 |
|             | 6 (TTA)4-x-3-(T)9-x4-(CTG)3-x1-(T)6             | 4649  | 4687 |

## BM32

|             |                                                 |       |      |
|-------------|-------------------------------------------------|-------|------|
| BM32 dMax10 | Total No. of Microsatellites found : 26         |       |      |
|             | Total No. of Compound Microsatellites found : 1 |       |      |
| No.         | Compound SSR                                    | Start | End  |
|             | 1 (CTT)5-x8-(TC)3                               | 4192  | 4219 |
| BM32 dMax20 | Total No. of Microsatellites found : 26         |       |      |
|             | Total No. of Compound Microsatellites found : 2 |       |      |
| No.         | Compound SSR                                    | Start | End  |
|             | 1 (T)6-x16-(A)8                                 | 3506  | 3535 |
|             | 2 (CTT)5-x8-(TC)3                               | 4192  | 4219 |
| BM32 dMax30 | Total No. of Microsatellites found : 26         |       |      |
|             | Total No. of Compound Microsatellites found : 3 |       |      |
| No.         | Compound SSR                                    | Start | End  |
|             | 1 (TG)3-x27-(A)6                                | 1074  | 1112 |
|             | 2 (T)6-x16-(A)8                                 | 3506  | 3535 |
|             | 3 (CTT)5-x8-(TC)3                               | 4192  | 4219 |
| BM32 dMax40 | Total No. of Microsatellites found : 26         |       |      |
|             | Total No. of Compound Microsatellites found : 3 |       |      |
| No.         | Compound SSR                                    | Start | End  |
|             | 1 (TG)3-x27-(A)6                                | 1074  | 1112 |
|             | 2 (T)6-x16-(A)8                                 | 3506  | 3535 |
|             | 3 (CTT)5-x8-(TC)3                               | 4192  | 4219 |
| BM32 dMax50 | Total No. of Microsatellites found : 26         |       |      |
|             | Total No. of Compound Microsatellites found : 4 |       |      |
| No.         | Compound SSR                                    | Start | End  |
|             | 1 (TG)3-x27-(A)6                                | 1074  | 1112 |
|             | 2 (AT)3-x41-(AT)3-x49-(GCA)4                    | 2112  | 2225 |
|             | 3 (T)6-x16-(A)8-x47-(AG)3                       | 3506  | 3588 |
|             | 4 (CTT)5-x8-(TC)3                               | 4192  | 4219 |

## BM33

|             |                                                 |       |      |
|-------------|-------------------------------------------------|-------|------|
| BM33 dMax10 | Total No. of Microsatellites found : 29         |       |      |
|             | Total No. of Compound Microsatellites found : 3 |       |      |
| No.         | Compound SSR                                    | Start | End  |
|             | 1 (CT)3-x2-(CCT)3                               | 54    | 71   |
|             | 2 (GA)3-x-1-(A)8                                | 1247  | 1259 |
|             | 3 (CTT)5-x8-(TC)3                               | 4181  | 4208 |
| BM33 dMax20 | Total No. of Microsatellites found : 29         |       |      |
|             | Total No. of Compound Microsatellites found : 5 |       |      |

| No. | Compound SSR    | Start | End  |
|-----|-----------------|-------|------|
| 1   | (CT)3-x2-(CCT)3 | 54    | 71   |
| 2   | (GA)3-x-1-(A)8  | 1247  | 1259 |
| 3   | (AT)3-x16-(T)6  | 3355  | 3382 |
| 4   | (T)6-x16-(A)8   | 3495  | 3524 |
| 5   | (CTT)5-x8-(TC)3 | 4181  | 4208 |

BM33 dMax30 Total No. of Microsatellites found : 29  
Total No. of Compound Microsatellites found : 5

| No. | Compound SSR    | Start | End  |
|-----|-----------------|-------|------|
| 1   | (CT)3-x2-(CCT)3 | 54    | 71   |
| 2   | (GA)3-x-1-(A)8  | 1247  | 1259 |
| 3   | (AT)3-x16-(T)6  | 3355  | 3382 |
| 4   | (T)6-x16-(A)8   | 3495  | 3524 |
| 5   | (CTT)5-x8-(TC)3 | 4181  | 4208 |

BM33 dMax40 Total No. of Microsatellites found : 29  
Total No. of Compound Microsatellites found : 6

| No. | Compound SSR             | Start | End  |
|-----|--------------------------|-------|------|
| 1   | (CT)3-x2-(CCT)3          | 54    | 71   |
| 2   | (GA)3-x-1-(A)8           | 1247  | 1259 |
| 3   | (TC)3-x38-(T)6-x36-(CA)3 | 3014  | 3105 |
| 4   | (AT)3-x16-(T)6           | 3355  | 3382 |
| 5   | (T)6-x16-(A)8            | 3495  | 3524 |
| 6   | (CTT)5-x8-(TC)3          | 4181  | 4208 |

BM33 dMax50 Total No. of Microsatellites found : 29  
Total No. of Compound Microsatellites found : 7

| No. | Compound SSR              | Start | End  |
|-----|---------------------------|-------|------|
| 1   | (CT)3-x2-(CCT)3-x47-(A)11 | 54    | 129  |
| 2   | (GA)3-x-1-(A)8            | 1247  | 1259 |
| 3   | (T)6-x48-(ATT)3           | 2694  | 2757 |
| 4   | (TC)3-x38-(T)6-x36-(CA)3  | 3014  | 3105 |
| 5   | (AT)3-x16-(T)6            | 3355  | 3382 |
| 6   | (T)6-x16-(A)8             | 3495  | 3524 |
| 7   | (CTT)5-x8-(TC)3           | 4181  | 4208 |

## BM34

BM34 dMax10 Total No. of Microsatellites found : 36  
Total No. of Compound Microsatellites found : 2

| No. | Compound SSR | Start | End  |
|-----|--------------|-------|------|
| 1   | (T)7-x5-(T)6 | 558   | 575  |
| 2   | (T)7-x8-(T)6 | 2990  | 3010 |

BM34 dMax20 Total No. of Microsatellites found : 36  
Total No. of Compound Microsatellites found : 5

| No. | Compound SSR             | Start | End  |
|-----|--------------------------|-------|------|
| 1   | (GCCT)3-x14-(A)6         | 123   | 153  |
| 2   | (T)7-x5-(T)6             | 558   | 575  |
| 3   | (AGA)5-x15-(GAG)3        | 1488  | 1526 |
| 4   | (T)7-x8-(T)6             | 2990  | 3010 |
| 5   | (A)6-x19-(G)6-x19-(GCT)4 | 4460  | 4520 |

BM34 dMax30 Total No. of Microsatellites found : 36  
Total No. of Compound Microsatellites found : 6

| No. | Compound SSR                                     | Start | End  |
|-----|--------------------------------------------------|-------|------|
| 1   | (GCA)3-x29-(CCT)3-x29-(GCCT)3-x14-(A)6-x28-(CT)3 | 46    | 187  |
| 2   | (T)7-x5-(T)6                                     | 558   | 575  |
| 3   | (AGA)5-x15-(GAG)3                                | 1488  | 1526 |
| 4   | (A)7-x23-(A)6                                    | 2074  | 2109 |
| 5   | (T)7-x8-(T)6                                     | 2990  | 3010 |

6 (GAA)4-x27-(A)6-x19-(G)6-x19-(GCT)4 4421 4520

BM34 dMax40 Total No. of Microsatellites found : 36

Total No. of Compound Microsatellites found : 7

| No. | Compound SSR                                     | Start | End  |
|-----|--------------------------------------------------|-------|------|
| 1   | (GCA)3-x29-(CCT)3-x29-(GCCT)3-x14-(A)6-x28-(CT)3 | 46    | 187  |
| 2   | (T)7-x5-(T)6                                     | 558   | 575  |
| 3   | (AG)3-x35-(AG)3                                  | 1303  | 1349 |
| 4   | (AGA)5-x15-(GAG)3-x34-(A)7                       | 1488  | 1567 |
| 5   | (A)7-x23-(A)6                                    | 2074  | 2109 |
| 6   | (T)7-x8-(T)6                                     | 2990  | 3010 |
| 7   | (GAA)4-x27-(A)6-x19-(G)6-x19-(GCT)4              | 4421  | 4520 |

BM34 dMax50 Total No. of Microsatellites found : 36

Total No. of Compound Microsatellites found : 8

| No. | Compound SSR                                     | Start | End  |
|-----|--------------------------------------------------|-------|------|
| 1   | (GCA)3-x29-(CCT)3-x29-(GCCT)3-x14-(A)6-x28-(CT)3 | 46    | 187  |
| 2   | (T)7-x5-(T)6                                     | 558   | 575  |
| 3   | (AG)3-x35-(AG)3                                  | 1303  | 1349 |
| 4   | (AGA)5-x15-(GAG)3-x34-(A)7                       | 1488  | 1567 |
| 5   | (A)7-x23-(A)6                                    | 2074  | 2109 |
| 6   | (T)7-x8-(T)6                                     | 2990  | 3010 |
| 7   | (GAA)4-x27-(A)6-x19-(G)6-x19-(GCT)4              | 4421  | 4520 |
| 8   | (T)6-x47-(AT)3                                   | 4724  | 4782 |

## BM35

BM35 dMax10 Total No. of Microsatellites found : 22

Total No. of Compound Microsatellites found : 1

| No. | Compound SSR   | Start | End  |
|-----|----------------|-------|------|
| 1   | (G)6-x6-(CTT)5 | 4271  | 4297 |

BM35 dMax20 Total No. of Microsatellites found : 22

Total No. of Compound Microsatellites found : 2

| No. | Compound SSR   | Start | End  |
|-----|----------------|-------|------|
| 1   | (A)6-x11-(GT)3 | 3947  | 3969 |
| 2   | (G)6-x6-(CTT)5 | 4271  | 4297 |

BM35 dMax30 Total No. of Microsatellites found : 22

Total No. of Compound Microsatellites found : 3

| No. | Compound SSR       | Start | End  |
|-----|--------------------|-------|------|
| 1   | (ATG)3-x22-(TGAA)3 | 1876  | 1919 |
| 2   | (A)6-x11-(GT)3     | 3947  | 3969 |
| 3   | (G)6-x6-(CTT)5     | 4271  | 4297 |

BM35 dMax40 Total No. of Microsatellites found : 22

Total No. of Compound Microsatellites found : 3

| No. | Compound SSR       | Start | End  |
|-----|--------------------|-------|------|
| 1   | (ATG)3-x22-(TGAA)3 | 1876  | 1919 |
| 2   | (A)6-x11-(GT)3     | 3947  | 3969 |
| 3   | (G)6-x6-(CTT)5     | 4271  | 4297 |

BM35 dMax50 Total No. of Microsatellites found : 22

Total No. of Compound Microsatellites found : 3

| No. | Compound SSR       | Start | End  |
|-----|--------------------|-------|------|
| 1   | (ATG)3-x22-(TGAA)3 | 1876  | 1919 |
| 2   | (A)6-x11-(GT)3     | 3947  | 3969 |
| 3   | (G)6-x6-(CTT)5     | 4271  | 4297 |

## BM36

|             |                                                 |       |      |
|-------------|-------------------------------------------------|-------|------|
| BM36 dMax10 | Total No. of Microsatellites found : 32         |       |      |
|             | Total No. of Compound Microsatellites found : 2 |       |      |
| No.         | Compound SSR                                    | Start | End  |
| 1           | (C)6-x6-(A)6                                    | 4575  | 4592 |
| 2           | (A)8-x1-(TTC)3                                  | 4691  | 4709 |

|             |                                                 |       |      |
|-------------|-------------------------------------------------|-------|------|
| BM36 dMax20 | Total No. of Microsatellites found : 32         |       |      |
|             | Total No. of Compound Microsatellites found : 3 |       |      |
| No.         | Compound SSR                                    | Start | End  |
| 1           | (TA)3-x16-(AG)3                                 | 627   | 654  |
| 2           | (C)6-x6-(A)6-x17-(A)7                           | 4575  | 4616 |
| 3           | (A)8-x1-(TTC)3                                  | 4691  | 4709 |

|             |                                                 |       |      |
|-------------|-------------------------------------------------|-------|------|
| BM36 dMax30 | Total No. of Microsatellites found : 32         |       |      |
|             | Total No. of Compound Microsatellites found : 4 |       |      |
| No.         | Compound SSR                                    | Start | End  |
| 1           | (TA)3-x16-(AG)3                                 | 627   | 654  |
| 2           | (C)6-x6-(A)6-x17-(A)7-x26-(A)7                  | 4575  | 4649 |
| 3           | (A)8-x1-(TTC)3                                  | 4691  | 4709 |
| 4           | (CT)3-x23-(T)6                                  | 4748  | 4782 |

|             |                                                 |       |      |
|-------------|-------------------------------------------------|-------|------|
| BM36 dMax40 | Total No. of Microsatellites found : 32         |       |      |
|             | Total No. of Compound Microsatellites found : 3 |       |      |
| No.         | Compound SSR                                    | Start | End  |
| 1           | (TA)3-x16-(AG)3                                 | 627   | 654  |
| 2           | (C)6-x6-(A)6-x17-(A)7-x26-(A)7                  | 4575  | 4649 |
| 3           | (A)8-x1-(TTC)3-x38-(CT)3-x23-(T)6               | 4691  | 4782 |

|             |                                                                |       |      |
|-------------|----------------------------------------------------------------|-------|------|
| BM36 dMax50 | Total No. of Microsatellites found : 32                        |       |      |
|             | Total No. of Compound Microsatellites found : 4                |       |      |
| No.         | Compound SSR                                                   | Start | End  |
| 1           | (TA)3-x16-(AG)3                                                | 627   | 654  |
| 2           | (AT)3-x41-(AT)3                                                | 2753  | 2805 |
| 3           | (A)7-x42-(TC)3                                                 | 3965  | 4019 |
| 4           | (C)6-x6-(A)6-x17-(A)7-x26-(A)7-x41-(A)8-x1-(TTC)3-x38-(CT)3-x2 | 4575  | 4782 |

## BM37

|             |                                                 |       |      |
|-------------|-------------------------------------------------|-------|------|
| BM37 dMax10 | Total No. of Microsatellites found : 31         |       |      |
|             | Total No. of Compound Microsatellites found : 3 |       |      |
| No.         | Compound SSR                                    | Start | End  |
| 1           | (A)6-x1-(AGA)4                                  | 1398  | 1416 |
| 2           | (TC)3-x1-(TG)3                                  | 2228  | 2240 |
| 3           | (CT)3-x3-(GT)4                                  | 4569  | 4585 |
|             | cSSR in SSR                                     |       |      |

6

|             |                                                 |       |      |
|-------------|-------------------------------------------------|-------|------|
| BM37 dMax20 | Total No. of Microsatellites found : 31         |       |      |
|             | Total No. of Compound Microsatellites found : 3 |       |      |
| No.         | Compound SSR                                    | Start | End  |
| 1           | (A)6-x1-(AGA)4                                  | 1398  | 1416 |
| 2           | (TC)3-x1-(TG)3                                  | 2228  | 2240 |
| 3           | (CT)3-x3-(GT)4                                  | 4569  | 4585 |
|             | cSSR in SSR                                     |       |      |

6

|             |                                                 |  |  |
|-------------|-------------------------------------------------|--|--|
| BM37 dMax30 | Total No. of Microsatellites found : 31         |  |  |
|             | Total No. of Compound Microsatellites found : 5 |  |  |

| No. | Compound SSR                | Start | End  |
|-----|-----------------------------|-------|------|
| 1   | (A)6-x1-(AGA)4              | 1398  | 1416 |
| 2   | (TC)3-x1-(TG)3              | 2228  | 2240 |
| 3   | (CT)3-x24-(TTGC)3-x20-(AC)3 | 3507  | 3575 |
| 4   | (G)8-x24-(G)13              | 4197  | 4241 |
| 5   | (CT)3-x3-(GT)4              | 4569  | 4585 |
|     | cSSR in SSR                 |       |      |

11

BM37 dMax40 Total No. of Microsatellites found : 31  
Total No. of Compound Microsatellites found : 5

| No. | Compound SSR                | Start | End  |
|-----|-----------------------------|-------|------|
| 1   | (A)6-x1-(AGA)4              | 1398  | 1416 |
| 2   | (TC)3-x1-(TG)3              | 2228  | 2240 |
| 3   | (CT)3-x24-(TTGC)3-x20-(AC)3 | 3507  | 3575 |
| 4   | (G)8-x24-(G)13              | 4197  | 4241 |
| 5   | (CT)3-x3-(GT)4              | 4569  | 4585 |
|     | cSSR in SSR                 |       |      |

11

BM37 dMax50 Total No. of Microsatellites found : 31  
Total No. of Compound Microsatellites found : 6

| No. | Compound SSR                | Start | End  |
|-----|-----------------------------|-------|------|
| 1   | (A)6-x1-(AGA)4              | 1398  | 1416 |
| 2   | (ATG)3-x40-(T)7             | 1848  | 1904 |
| 3   | (TC)3-x1-(TG)3              | 2228  | 2240 |
| 4   | (CT)3-x24-(TTGC)3-x20-(AC)3 | 3507  | 3575 |
| 5   | (G)8-x24-(G)13              | 4197  | 4241 |
| 6   | (CT)3-x3-(GT)4              | 4569  | 4585 |

## BM38

BM38 dMax10 Total No. of Microsatellites found : 22  
Total No. of Compound Microsatellites found : 1

| No. | Compound SSR  | Start | End |
|-----|---------------|-------|-----|
| 1   | (CT)3-x9-(A)7 | 186   | 207 |
|     | SSR in cSSR 2 |       |     |

BM38 dMax20 Total No. of Microsatellites found : 22  
Total No. of Compound Microsatellites found : 1

| No. | Compound SSR  | Start | End |
|-----|---------------|-------|-----|
| 1   | (CT)3-x9-(A)7 | 186   | 207 |
|     | SSR in cSSR   | 2     |     |

BM38 dMax30 Total No. of Microsatellites found : 22  
Total No. of Compound Microsatellites found : 3

| No. | Compound SSR     | Start | End  |
|-----|------------------|-------|------|
| 1   | (TC)4-x27-(TG)3  | 5     | 45   |
| 2   | (CT)3-x9-(A)7    | 186   | 207  |
| 3   | (GAT)3-x24-(TC)4 | 4497  | 4537 |
|     | SSR in cSSR      | 6     |      |

BM38 dMax40 Total No. of Microsatellites found : 22  
Total No. of Compound Microsatellites found : 3

| No. | Compound SSR             | Start | End  |
|-----|--------------------------|-------|------|
| 1   | (TC)4-x27-(TG)3          | 5     | 45   |
| 2   | (CCT)3-x38-(CT)3-x9-(A)7 | 138   | 207  |
| 3   | (GAT)3-x24-(TC)4         | 4497  | 4537 |
|     | SSR in cSSR              | 7     |      |

BM38 dMax50 Total No. of Microsatellites found : 22  
Total No. of Compound Microsatellites found : 3

| No. | Compound SSR | Start | End |
|-----|--------------|-------|-----|
|-----|--------------|-------|-----|

|                                                         |      |      |
|---------------------------------------------------------|------|------|
| 1 (TC)4-x27-(TG)3-x40-(T)6-x46-(CCT)3-x38-(CT)3-x9-(A)7 | 5    | 207  |
| 2 (CA)3-x41-(AG)3                                       | 2674 | 2726 |
| 3 (GAT)3-x24-(TC)4                                      | 4497 | 4537 |
| SSR in cSSR                                             | 10   |      |

## BM39

BM39 dMax10 Total No. of Microsatellites found : 40

Total No. of Compound Microsatellites found : 5

| No. | Compound SSR      | Start | End  |
|-----|-------------------|-------|------|
| 1   | (TA)3-x2-(A)10    | 112   | 129  |
| 2   | (AGA)4-x-9-(GGA)7 | 1596  | 1619 |
| 3   | (T)6-x9-(T)6      | 3165  | 3185 |
| 4   | (A)6-x8-(T)7      | 3444  | 3464 |
| 5   | (T)6-x4-(T)6      | 4332  | 4347 |

BM39 dMax20 Total No. of Microsatellites found : 40

Total No. of Compound Microsatellites found : 5

| No. | Compound SSR      | Start | End  |
|-----|-------------------|-------|------|
| 1   | (TA)3-x2-(A)10    | 112   | 129  |
| 2   | (AGA)4-x-9-(GGA)7 | 1596  | 1619 |
| 3   | (T)6-x9-(T)6      | 3165  | 3185 |
| 4   | (A)6-x8-(T)7      | 3444  | 3464 |
| 5   | (T)6-x4-(T)6      | 4332  | 4347 |

BM39 dMax30 Total No. of Microsatellites found : 40

Total No. of Compound Microsatellites found : 10

| No. | Compound SSR       | Start | End  |
|-----|--------------------|-------|------|
| 1   | (TA)3-x2-(A)10     | 112   | 129  |
| 2   | (TTA)4-x28-(AAAT)3 | 325   | 377  |
| 3   | (TC)3-x22-(CT)3    | 851   | 884  |
| 4   | (AG)3-x22-(GT)3    | 1228  | 1261 |
| 5   | (AGA)4-x-9-(GGA)7  | 1596  | 1619 |
| 6   | (AT)3-x23-(A)7     | 2418  | 2453 |
| 7   | (T)6-x9-(T)6       | 3165  | 3185 |
| 8   | (A)6-x8-(T)7       | 3444  | 3464 |
| 9   | (T)6-x20-(A)6      | 3922  | 3953 |
| 10  | (T)6-x4-(T)6       | 4332  | 4347 |

BM39 dMax40 Total No. of Microsatellites found : 40

Total No. of Compound Microsatellites found : 11

| No. | Compound SSR               | Start | End  |
|-----|----------------------------|-------|------|
| 1   | (T)6-x35-(TA)3-x2-(A)10    | 71    | 129  |
| 2   | (TTA)4-x28-(AAAT)3         | 325   | 377  |
| 3   | (TC)3-x22-(CT)3            | 851   | 884  |
| 4   | (T)7-x34-(TA)3             | 1070  | 1116 |
| 5   | (AG)3-x22-(GT)3            | 1228  | 1261 |
| 6   | (AGA)4-x-9-(GGA)7-x34-(A)6 | 1596  | 1659 |
| 7   | (AT)3-x23-(A)7             | 2418  | 2453 |
| 8   | (T)6-x9-(T)6               | 3165  | 3185 |
| 9   | (A)6-x8-(T)7               | 3444  | 3464 |
| 10  | (T)6-x20-(A)6              | 3922  | 3953 |
| 11  | (T)6-x4-(T)6               | 4332  | 4347 |

BM39 dMax50 Total No. of Microsatellites found : 40

Total No. of Compound Microsatellites found : 11

| No. | Compound SSR                     | Start | End |
|-----|----------------------------------|-------|-----|
| 1   | (A)6-x46-(T)6-x35-(TA)3-x2-(A)10 | 19    | 129 |
| 2   | (TTA)4-x28-(AAAT)3               | 325   | 377 |
| 3   | (TC)3-x22-(CT)3                  | 851   | 884 |

|                              |      |      |
|------------------------------|------|------|
| 4 (T)7-x34-(TA)3             | 1070 | 1116 |
| 5 (AG)3-x22-(GT)3            | 1228 | 1261 |
| 6 (AGA)4-x-9-(GGA)7-x34-(A)6 | 1596 | 1659 |
| 7 (AT)3-x23-(A)7             | 2418 | 2453 |
| 8 (T)6-x9-(T)6               | 3165 | 3185 |
| 9 (A)6-x8-(T)7               | 3444 | 3464 |
| 10 (CA)3-x41-(T)6-x20-(A)6   | 3875 | 3953 |
| 11 (T)6-x4-(T)6              | 4332 | 4347 |

## BM40

BM40 dMax10 Total No. of Microsatellites found : 45  
Total No. of Compound Microsatellites found : 4

| No. | Compound SSR            | Start | End  |
|-----|-------------------------|-------|------|
| 1   | (AG)3-x6-(CT)3-x0-(TA)3 | 19    | 42   |
| 2   | (GC)3-x7-(A)6           | 53    | 71   |
| 3   | (CCT)3-x7-(A)9          | 128   | 152  |
| 4   | (GCT)4-x9-(TG)3         | 1161  | 1187 |

BM40 dMax20 Total No. of Microsatellites found : 45  
Total No. of Compound Microsatellites found : 5

| No. | Compound SSR                                         | Start | End  |
|-----|------------------------------------------------------|-------|------|
| 1   | (AG)3-x6-(CT)3-x0-(TA)3-x10-(GC)3-x7-(A)6-x10-(CCT)3 | 19    | 91   |
| 2   | (CCT)3-x7-(A)9                                       | 128   | 152  |
| 3   | (GCT)4-x9-(TG)3                                      | 1161  | 1187 |
| 4   | (GTC)4-x17-(G)6                                      | 4144  | 4179 |
| 5   | (CTG)4-x12-(CTG)6                                    | 4417  | 4458 |

BM40 dMax30 Total No. of Microsatellites found : 45  
Total No. of Compound Microsatellites found : 8

| No. | Compound SSR                                         | Start | End  |
|-----|------------------------------------------------------|-------|------|
| 1   | (AG)3-x6-(CT)3-x0-(TA)3-x10-(GC)3-x7-(A)6-x10-(CCT)3 | 19    | 91   |
| 2   | (CCT)3-x7-(A)9                                       | 128   | 152  |
| 3   | (GCT)4-x9-(TG)3                                      | 1161  | 1187 |
| 4   | (GTC)4-x17-(G)6                                      | 4144  | 4179 |
| 5   | (ATC)3-x27-(AT)4                                     | 4285  | 4328 |
| 6   | (CTG)4-x12-(CTG)6                                    | 4417  | 4458 |
| 7   | (TGC)5-x24-(GAT)3                                    | 4535  | 4582 |
| 8   | (AT)3-x26-(A)6                                       | 4702  | 4739 |

BM40 dMax40 Total No. of Microsatellites found : 45  
Total No. of Compound Microsatellites found : 9

| No. | Compound SSR                                                 | Start | End  |
|-----|--------------------------------------------------------------|-------|------|
| 1   | (AG)3-x6-(CT)3-x0-(TA)3-x10-(GC)3-x7-(A)6-x10-(CCT)3-x36-(CC | 19    | 152  |
| 2   | (T)7-x37-(T)7                                                | 302   | 352  |
| 3   | (AC)3-x34-(GCT)4-x9-(TG)3                                    | 1121  | 1187 |
| 4   | (GTC)4-x17-(G)6                                              | 4144  | 4179 |
| 5   | (ATC)3-x27-(AT)4                                             | 4285  | 4328 |
| 6   | (CTG)4-x12-(CTG)6                                            | 4417  | 4458 |
| 7   | (TGC)5-x24-(GAT)3                                            | 4535  | 4582 |
| 8   | (AT)3-x26-(A)6                                               | 4702  | 4739 |
| 9   | (TTAC)3-x33-(CT)3                                            | 4800  | 4850 |

BM40 dMax50 Total No. of Microsatellites found : 45  
Total No. of Compound Microsatellites found : 9

| No. | Compound SSR                                                 | Start | End  |
|-----|--------------------------------------------------------------|-------|------|
| 1   | (AG)3-x6-(CT)3-x0-(TA)3-x10-(GC)3-x7-(A)6-x10-(CCT)3-x36-(CC | 19    | 152  |
| 2   | (T)8-x47-(T)7-x37-(T)7                                       | 247   | 352  |
| 3   | (AC)3-x34-(GCT)4-x9-(TG)3                                    | 1121  | 1187 |
| 4   | (GTC)4-x17-(G)6                                              | 4144  | 4179 |
| 5   | (ATC)3-x27-(AT)4                                             | 4285  | 4328 |
| 6   | (CTG)4-x12-(CTG)6                                            | 4417  | 4458 |
| 7   | (TGC)5-x24-(GAT)3                                            | 4535  | 4582 |
| 8   | (AT)3-x26-(A)6                                               | 4702  | 4739 |
| 9   | (TTAC)3-x33-(CT)3                                            | 4800  | 4850 |

## BM41

BM41 dMax10 Total No. of Microsatellites found : 39  
Total No. of Compound Microsatellites found : 4

| No. | Compound SSR           | Start | End  |
|-----|------------------------|-------|------|
| 1   | (TA)3-x5-(A)7          | 93    | 110  |
| 2   | (AGA)5-x2-(C)6-x0-(A)7 | 1642  | 1671 |
| 3   | (AT)3-x6-(T)7          | 3587  | 3605 |
| 4   | (A)7-x6-(CA)3          | 3853  | 3871 |

BM41 dMax20 Total No. of Microsatellites found : 39  
Total No. of Compound Microsatellites found : 7

| No. | Compound SSR                        | Start | End  |
|-----|-------------------------------------|-------|------|
| 1   | (CCT)3-x12-(AGG)3-x18-(TA)3-x5-(A)7 | 43    | 110  |
| 2   | (AGA)5-x2-(C)6-x0-(A)7              | 1642  | 1671 |
| 3   | (TG)6-x15-(AG)3                     | 2005  | 2036 |
| 4   | (T)7-x10-(T)7                       | 3155  | 3178 |
| 5   | (AT)3-x6-(T)7                       | 3587  | 3605 |
| 6   | (TA)3-x11-(A)7-x6-(CA)3             | 3836  | 3871 |
| 7   | (TC)3-x10-(A)6                      | 4679  | 4700 |

BM41 dMax30 Total No. of Microsatellites found : 39  
Total No. of Compound Microsatellites found : 8

| No. | Compound SSR                        | Start | End  |
|-----|-------------------------------------|-------|------|
| 1   | (CCT)3-x12-(AGG)3-x18-(TA)3-x5-(A)7 | 43    | 110  |
| 2   | (AGA)5-x2-(C)6-x0-(A)7              | 1642  | 1671 |
| 3   | (TG)6-x15-(AG)3                     | 2005  | 2036 |
| 4   | (T)7-x29-(AT)3                      | 2081  | 2122 |
| 5   | (T)7-x10-(T)7                       | 3155  | 3178 |
| 6   | (AT)3-x6-(T)7                       | 3587  | 3605 |
| 7   | (TA)3-x11-(A)7-x6-(CA)3             | 3836  | 3871 |
| 8   | (TC)3-x10-(A)6                      | 4679  | 4700 |

BM41 dMax40 Total No. of Microsatellites found : 39  
Total No. of Compound Microsatellites found : 9

| No. | Compound SSR                        | Start | End  |
|-----|-------------------------------------|-------|------|
| 1   | (CCT)3-x12-(AGG)3-x18-(TA)3-x5-(A)7 | 43    | 110  |
| 2   | (TG)3-x30-(AAAG)4                   | 294   | 345  |
| 3   | (AGA)5-x2-(C)6-x0-(A)7              | 1642  | 1671 |
| 4   | (TG)6-x15-(AG)3                     | 2005  | 2036 |
| 5   | (T)7-x29-(AT)3                      | 2081  | 2122 |

|                           |      |      |
|---------------------------|------|------|
| 6 (T)7-x10-(T)7           | 3155 | 3178 |
| 7 (AT)3-x6-(T)7           | 3587 | 3605 |
| 8 (TA)3-x11-(A)7-x6-(CA)3 | 3836 | 3871 |
| 9 (TC)3-x10-(A)6          | 4679 | 4700 |

BM41 dMax50 Total No. of Microsatellites found : 39  
Total No. of Compound Microsatellites found : 9

| No. | Compound SSR                        | Start | End  |
|-----|-------------------------------------|-------|------|
| 1   | (CCT)3-x12-(AGG)3-x18-(TA)3-x5-(A)7 | 43    | 110  |
| 2   | (TG)3-x30-(AAAG)4-x48-(A)7          | 294   | 400  |
| 3   | (AGA)5-x2-(C)6-x0-(A)7              | 1642  | 1671 |
| 4   | (TG)6-x15-(AG)3-x44-(T)7-x29-(AT)3  | 2005  | 2122 |
| 5   | (T)7-x10-(T)7                       | 3155  | 3178 |
| 6   | (AT)3-x6-(T)7                       | 3587  | 3605 |
| 7   | (TA)3-x11-(A)7-x6-(CA)3             | 3836  | 3871 |
| 8   | (A)6-x40-(T)14-x46-(T)6             | 4273  | 4384 |
| 9   | (TC)3-x10-(A)6-x47-(A)7             | 4679  | 4754 |

## BM42

BM42 dMax10 Total No. of Microsatellites found : 34  
Total No. of Compound Microsatellites found : 4

| No. | Compound SSR           | Start | End  |
|-----|------------------------|-------|------|
| 1   | (TA)6-x-1-(A)9         | 132   | 150  |
| 2   | (GA)3-x0-(T)6          | 1188  | 1199 |
| 3   | (CA)3-x4-(A)6-x2-(AT)3 | 3602  | 3625 |
| 4   | (CTG)3-x8-(T)6         | 3817  | 3840 |

BM42 dMax20 Total No. of Microsatellites found : 34  
Total No. of Compound Microsatellites found : 6

| No. | Compound SSR           | Start | End  |
|-----|------------------------|-------|------|
| 1   | (T)8-x12-(A)7-x17-(T)6 | 10    | 59   |
| 2   | (TA)6-x-1-(A)9         | 132   | 150  |
| 3   | (GA)3-x0-(T)6          | 1188  | 1199 |
| 4   | (AT)3-x13-(CAA)4       | 2628  | 2659 |
| 5   | (CA)3-x4-(A)6-x2-(AT)3 | 3602  | 3625 |
| 6   | (CTG)3-x8-(T)6         | 3817  | 3840 |

BM42 dMax30 Total No. of Microsatellites found : 34  
Total No. of Compound Microsatellites found : 6

| No. | Compound SSR             | Start | End  |
|-----|--------------------------|-------|------|
| 1   | (T)8-x12-(A)7-x17-(T)6   | 10    | 59   |
| 2   | (TA)6-x-1-(A)9           | 132   | 150  |
| 3   | (GA)3-x0-(T)6            | 1188  | 1199 |
| 4   | (AT)3-x13-(CAA)4         | 2628  | 2659 |
| 5   | (CA)3-x4-(A)6-x2-(AT)3   | 3602  | 3625 |
| 6   | (CT)3-x21-(CTG)3-x8-(T)6 | 3790  | 3840 |

BM42 dMax40 Total No. of Microsatellites found : 34  
Total No. of Compound Microsatellites found : 8

| No. | Compound SSR           | Start | End |
|-----|------------------------|-------|-----|
| 1   | (T)8-x12-(A)7-x17-(T)6 | 10    | 59  |
| 2   | (TA)6-x-1-(A)9         | 132   | 150 |

|                            |      |      |
|----------------------------|------|------|
| 3 (GCT)4-x36-(GCT)5        | 687  | 748  |
| 4 (GA)3-x0-(T)6            | 1188 | 1199 |
| 5 (A)7-x31-(A)6            | 1433 | 1476 |
| 6 (AT)3-x13-(CAA)4         | 2628 | 2659 |
| 7 (CA)3-x4-(A)6-x2-(AT)3   | 3602 | 3625 |
| 8 (CT)3-x21-(CTG)3-x8-(T)6 | 3790 | 3840 |

BM42 dMax50 Total No. of Microsatellites found : 34  
Total No. of Compound Microsatellites found : 10

| No. | Compound SSR             | Start | End  |
|-----|--------------------------|-------|------|
| 1   | (T)8-x12-(A)7-x17-(T)6   | 10    | 59   |
| 2   | (TA)6-x-1-(A)9           | 132   | 150  |
| 3   | (A)6-x42-(A)6            | 541   | 594  |
| 4   | (GCT)4-x36-(GCT)5        | 687   | 748  |
| 5   | (GA)3-x0-(T)6            | 1188  | 1199 |
| 6   | (A)7-x31-(A)6            | 1433  | 1476 |
| 7   | (A)6-x46-(T)8            | 1982  | 2041 |
| 8   | (AT)3-x13-(CAA)4         | 2628  | 2659 |
| 9   | (CA)3-x4-(A)6-x2-(AT)3   | 3602  | 3625 |
| 10  | (CT)3-x21-(CTG)3-x8-(T)6 | 3790  | 3840 |

### BM43

BM43 dMax10 Total No. of Microsatellites found : 30  
Total No. of Compound Microsatellites found : 3

| No. | Compound SSR         | Start | End  |
|-----|----------------------|-------|------|
| 1   | (T)6-x3-(A)7-x3-(A)6 | 10    | 34   |
| 2   | (TAT)3-x0-(A)9       | 120   | 138  |
| 3   | (T)6-x3-(AC)3        | 2757  | 2771 |

BM43 dMax20 Total No. of Microsatellites found : 30  
Total No. of Compound Microsatellites found : 5

| No. | Compound SSR         | Start | End  |
|-----|----------------------|-------|------|
| 1   | (T)6-x3-(A)7-x3-(A)6 | 10    | 34   |
| 2   | (TAT)3-x0-(A)9       | 120   | 138  |
| 3   | (A)6-x17-(T)8        | 570   | 600  |
| 4   | (T)6-x3-(AC)3        | 2757  | 2771 |
| 5   | (CT)3-x11-(TA)3      | 4098  | 4120 |

BM43 dMax30 Total No. of Microsatellites found : 30  
Total No. of Compound Microsatellites found : 6

| No. | Compound SSR         | Start | End  |
|-----|----------------------|-------|------|
| 1   | (T)6-x3-(A)7-x3-(A)6 | 10    | 34   |
| 2   | (TAT)3-x0-(A)9       | 120   | 138  |
| 3   | (A)6-x17-(T)8        | 570   | 600  |
| 4   | (T)6-x3-(AC)3        | 2757  | 2771 |
| 5   | (CT)3-x23-(T)7       | 3741  | 3776 |
| 6   | (CT)3-x11-(TA)3      | 4098  | 4120 |

BM43 dMax40 Total No. of Microsatellites found : 30  
Total No. of Compound Microsatellites found : 7

| No. | Compound SSR                                        | Start | End |
|-----|-----------------------------------------------------|-------|-----|
| 1   | (T)6-x3-(A)7-x3-(A)6-x38-(CTTA)3-x36-(TAT)3-x0-(A)9 | 10    | 138 |

|                            |      |      |
|----------------------------|------|------|
| 2 (A)6-x36-(A)6-x17-(T)8   | 528  | 600  |
| 3 (GCT)4-x36-(GCT)4        | 665  | 724  |
| 4 (T)7-x30-(GT)3           | 2010 | 2052 |
| 5 (T)6-x3-(AC)3            | 2757 | 2771 |
| 6 (CT)3-x23-(T)7-x35-(T)6  | 3741 | 3817 |
| 7 (CT)3-x11-(TA)3-x32-(A)6 | 4098 | 4158 |

BM43 dMax50 Total No. of Microsatellites found : 30  
Total No. of Compound Microsatellites found : 7

| No. | Compound SSR                                        | Start | End  |
|-----|-----------------------------------------------------|-------|------|
| 1   | (T)6-x3-(A)7-x3-(A)6-x38-(CTTA)3-x36-(TAT)3-x0-(A)9 | 10    | 138  |
| 2   | (A)6-x36-(A)6-x17-(T)8                              | 528   | 600  |
| 3   | (GCT)4-x36-(GCT)4                                   | 665   | 724  |
| 4   | (T)7-x30-(GT)3                                      | 2010  | 2052 |
| 5   | (T)6-x3-(AC)3                                       | 2757  | 2771 |
| 6   | (CT)3-x23-(T)7-x35-(T)6                             | 3741  | 3817 |
| 7   | (CT)3-x11-(TA)3-x32-(A)6                            | 4098  | 4158 |

## BM44

BM44 dMax10 Total No. of Microsatellites found : 28  
Total No. of Compound Microsatellites found : 2

| No. | Compound SSR   | Start | End  |
|-----|----------------|-------|------|
| 1   | (ATG)4-x4-(G)6 | 236   | 256  |
| 2   | (A)6-x3-(AT)3  | 4605  | 4619 |

BM44 dMax20 Total No. of Microsatellites found : 28  
Total No. of Compound Microsatellites found : 4

| No. | Compound SSR   | Start | End  |
|-----|----------------|-------|------|
| 1   | (ATG)4-x4-(G)6 | 236   | 256  |
| 2   | (T)6-x14-(T)6  | 742   | 767  |
| 3   | (T)6-x14-(T)6  | 4315  | 4340 |
| 4   | (A)6-x3-(AT)3  | 4605  | 4619 |

BM44 dMax30 Total No. of Microsatellites found : 28  
Total No. of Compound Microsatellites found : 5

| No. | Compound SSR   | Start | End  |
|-----|----------------|-------|------|
| 1   | (ATG)4-x4-(G)6 | 236   | 256  |
| 2   | (T)6-x14-(T)6  | 742   | 767  |
| 3   | (G)6-x26-(T)8  | 3269  | 3308 |
| 4   | (T)6-x14-(T)6  | 4315  | 4340 |
| 5   | (A)6-x3-(AT)3  | 4605  | 4619 |

BM44 dMax40 Total No. of Microsatellites found : 28  
Total No. of Compound Microsatellites found : 7

| No. | Compound SSR    | Start | End  |
|-----|-----------------|-------|------|
| 1   | (ATG)4-x4-(G)6  | 236   | 256  |
| 2   | (T)6-x14-(T)6   | 742   | 767  |
| 3   | (G)6-x26-(T)8   | 3269  | 3308 |
| 4   | (T)6-x14-(T)6   | 4315  | 4340 |
| 5   | (T)6-x30-(TCA)4 | 4457  | 4504 |
| 6   | (A)6-x3-(AT)3   | 4605  | 4619 |
| 7   | (CA)3-x35-(T)7  | 4795  | 4842 |

BM44 dMax50 Total No. of Microsatellites found : 28  
Total No. of Compound Microsatellites found : 7

| No. | Compound SSR    | Start | End  |
|-----|-----------------|-------|------|
| 1   | (ATG)4-x4-(G)6  | 236   | 256  |
| 2   | (T)6-x14-(T)6   | 742   | 767  |
| 3   | (G)6-x26-(T)8   | 3269  | 3308 |
| 4   | (T)6-x14-(T)6   | 4315  | 4340 |
| 5   | (T)6-x30-(TCA)4 | 4457  | 4504 |
| 6   | (A)6-x3-(AT)3   | 4605  | 4619 |
| 7   | (CA)3-x35-(T)7  | 4795  | 4842 |

## BM45

BM45 dMax10 Total No. of Microsatellites found : 31  
Total No. of Compound Microsatellites found : 3

| No. | Compound SSR   | Start | End  |
|-----|----------------|-------|------|
| 1   | (TA)3-x1-(A)14 | 112   | 132  |
| 2   | (AGG)4-x5-(T)6 | 574   | 596  |
| 3   | (TA)4-x1-(A)7  | 4773  | 4788 |

BM45 dMax20 Total No. of Microsatellites found : 31  
Total No. of Compound Microsatellites found : 4

| No. | Compound SSR   | Start | End  |
|-----|----------------|-------|------|
| 1   | (TA)3-x1-(A)14 | 112   | 132  |
| 2   | (AGG)4-x5-(T)6 | 574   | 596  |
| 3   | (T)6-x10-(A)6  | 4705  | 4726 |
| 4   | (TA)4-x1-(A)7  | 4773  | 4788 |

BM45 dMax30 Total No. of Microsatellites found : 31  
Total No. of Compound Microsatellites found : 4

| No. | Compound SSR   | Start | End  |
|-----|----------------|-------|------|
| 1   | (TA)3-x1-(A)14 | 112   | 132  |
| 2   | (AGG)4-x5-(T)6 | 574   | 596  |
| 3   | (T)6-x10-(A)6  | 4705  | 4726 |
| 4   | (TA)4-x1-(A)7  | 4773  | 4788 |

BM45 dMax40 Total No. of Microsatellites found : 31  
Total No. of Compound Microsatellites found : 4

| No. | Compound SSR            | Start | End  |
|-----|-------------------------|-------|------|
| 1   | (T)6-x36-(TA)3-x1-(A)14 | 70    | 132  |
| 2   | (AGG)4-x5-(T)6          | 574   | 596  |
| 3   | (T)6-x10-(A)6           | 4705  | 4726 |
| 4   | (TA)4-x1-(A)7           | 4773  | 4788 |

BM45 dMax50 Total No. of Microsatellites found : 31  
Total No. of Compound Microsatellites found : 5

| No. | Compound SSR                                 | Start | End  |
|-----|----------------------------------------------|-------|------|
| 1   | (T)6-x36-(TA)3-x1-(A)14                      | 70    | 132  |
| 2   | (AGG)4-x5-(T)6                               | 574   | 596  |
| 3   | (CT)3-x41-(GCTAC)3                           | 1004  | 1066 |
| 4   | (TCT)4-x42-(T)6                              | 4361  | 4420 |
| 5   | (AGCAA)3-x45-(T)6-x10-(A)6-x46-(TA)4-x1-(A)7 | 4646  | 4788 |

**BM46**

BM46 dMax10 Total No. of Microsatellites found : 37  
Total No. of Compound Microsatellites found : 3

| No. | Compound SSR   | Start | End  |
|-----|----------------|-------|------|
| 1   | (AGA)5-x7-(A)8 | 1583  | 1612 |
| 2   | (A)6-x0-(CT)3  | 3921  | 3932 |
| 3   | (TCT)4-x5-(T)6 | 4348  | 4372 |

BM46 dMax20 Total No. of Microsatellites found : 37  
Total No. of Compound Microsatellites found : 3

|   |                        |      |      |
|---|------------------------|------|------|
| 1 | (AGA)5-x7-(A)8         | 1583 | 1612 |
| 2 | (T)7-x19-(A)6-x0-(CT)3 | 3895 | 3932 |
| 3 | (TCT)4-x5-(T)6         | 4348 | 4372 |

BM46 dMax30 Total No. of Microsatellites found : 37  
Total No. of Compound Microsatellites found : 6

| No. | Compound SSR              | Start | End  |
|-----|---------------------------|-------|------|
| 1   | (TC)3-x28-(AGA)5-x7-(A)8  | 1549  | 1612 |
| 2   | (G)6-x22-(TG)3            | 2049  | 2082 |
| 3   | (TC)3-x27-(CAC)4          | 2268  | 2312 |
| 4   | (T)7-x19-(A)6-x0-(CT)3    | 3895  | 3932 |
| 5   | (T)6-x27-(TCT)4-x5-(T)6   | 4315  | 4372 |
| 6   | (AT)3-x26-(CA)3-x20-(TC)3 | 4638  | 4701 |

BM46 dMax40 Total No. of Microsatellites found : 37  
Total No. of Compound Microsatellites found : 7

| No. | Compound SSR                       | Start | End  |
|-----|------------------------------------|-------|------|
| 1   | (A)6-x34-(T)7                      | 253   | 299  |
| 2   | (TC)3-x28-(AGA)5-x7-(A)8           | 1549  | 1612 |
| 3   | (G)6-x22-(TG)3                     | 2049  | 2082 |
| 4   | (TC)3-x27-(CAC)4                   | 2268  | 2312 |
| 5   | (T)7-x19-(A)6-x0-(CT)3             | 3895  | 3932 |
| 6   | (T)6-x27-(TCT)4-x5-(T)6-x34-(TTC)9 | 4315  | 4433 |
| 7   | (AT)3-x26-(CA)3-x20-(TC)3          | 4638  | 4701 |

BM46 dMax50 Total No. of Microsatellites found : 37  
Total No. of Compound Microsatellites found : 7

| No. | Compound SSR                       | Start | End  |
|-----|------------------------------------|-------|------|
| 1   | (A)6-x34-(T)7                      | 253   | 299  |
| 2   | (TC)3-x28-(AGA)5-x7-(A)8           | 1549  | 1612 |
| 3   | (G)6-x22-(TG)3                     | 2049  | 2082 |
| 4   | (TC)3-x27-(CAC)4                   | 2268  | 2312 |
| 5   | (T)7-x19-(A)6-x0-(CT)3             | 3895  | 3932 |
| 6   | (T)6-x27-(TCT)4-x5-(T)6-x34-(TTC)9 | 4315  | 4433 |
| 7   | (AT)3-x26-(CA)3-x20-(TC)3          | 4638  | 4701 |

**BM47**

BM47 dMax10 Total No. of Microsatellites found : 35  
Total No. of Compound Microsatellites found : 2

RESULTS: 1 - 2

| No. | Compound SSR             | Start | End  |
|-----|--------------------------|-------|------|
| 1   | (AGG)4-x-2-(G)6          | 2694  | 2708 |
| 2   | (AG)3-x7-(AC)3-x1-(AAT)4 | 4383  | 4414 |

BM47 dMax20 Total No. of Microsatellites found : 35  
Total No. of Compound Microsatellites found : 3

| No. | Compound SSR             | Start | End  |
|-----|--------------------------|-------|------|
| 1   | (AGA)7-x13-(A)6          | 1485  | 1524 |
| 2   | (AGG)4-x-2-(G)6          | 2694  | 2708 |
| 3   | (AG)3-x7-(AC)3-x1-(AAT)4 | 4383  | 4414 |

BM47 dMax30 Total No. of Microsatellites found : 35  
Total No. of Compound Microsatellites found : 5

| No. | Compound SSR             | Start | End  |
|-----|--------------------------|-------|------|
| 1   | (AT)4-x21-(AG)3          | 1205  | 1239 |
| 2   | (AGA)7-x13-(A)6          | 1485  | 1524 |
| 3   | (AGG)4-x-2-(G)6          | 2694  | 2708 |
| 4   | (A)6-x26-(TA)3           | 4056  | 4093 |
| 5   | (AG)3-x7-(AC)3-x1-(AAT)4 | 4383  | 4414 |

BM47 dMax40 Total No. of Microsatellites found : 35  
Total No. of Compound Microsatellites found : 8

| No. | Compound SSR                       | Start | End  |
|-----|------------------------------------|-------|------|
| 1   | (GA)3-x39-(A)8                     | 53    | 105  |
| 2   | (C)6-x31-(GAG)5                    | 392   | 443  |
| 3   | (T)6-x37-(AT)4-x21-(AG)3-x38-(AG)3 | 1162  | 1283 |
| 4   | (AGA)7-x13-(A)6                    | 1485  | 1524 |
| 5   | (AGG)4-x-2-(G)6                    | 2694  | 2708 |
| 6   | (T)6-x34-(TC)3                     | 3066  | 3111 |
| 7   | (A)8-x39-(A)6-x26-(TA)3            | 4009  | 4093 |
| 8   | (AG)3-x7-(AC)3-x1-(AAT)4           | 4383  | 4414 |

BM47 dMax50 Total No. of Microsatellites found : 35  
Total No. of Compound Microsatellites found : 9

| No. | Compound SSR                                  | Start | End  |
|-----|-----------------------------------------------|-------|------|
| 1   | (GA)3-x39-(A)8                                | 53    | 105  |
| 2   | (C)6-x31-(GAG)5                               | 392   | 443  |
| 3   | (T)6-x37-(AT)4-x21-(AG)3-x38-(AG)3-x45-(AGA)4 | 1162  | 1340 |
| 4   | (AGA)7-x13-(A)6                               | 1485  | 1524 |
| 5   | (GA)3-x45-(TGA)3                              | 1719  | 1779 |
| 6   | (AGG)4-x-2-(G)6                               | 2694  | 2708 |
| 7   | (T)6-x34-(TC)3                                | 3066  | 3111 |
| 8   | (A)8-x39-(A)6-x26-(TA)3                       | 4009  | 4093 |
| 9   | (AG)3-x7-(AC)3-x1-(AAT)4                      | 4383  | 4414 |

## BM48

BM48 dMax10 Total No. of Microsatellites found : 33  
Total No. of Compound Microsatellites found : 2

| No. | Compound SSR   | Start | End  |
|-----|----------------|-------|------|
| 1   | (TAT)3-x0-(A)9 | 121   | 139  |
| 2   | (CTG)3-x8-(T)6 | 3783  | 3806 |

BM48 dMax20 Total No. of Microsatellites found : 33  
Total No. of Compound Microsatellites found : 2

| No. | Compound SSR            | Start | End  |
|-----|-------------------------|-------|------|
| 1   | (TAT)3-x0-(A)9          | 121   | 139  |
| 2   | (T)7-x17-(CTG)3-x8-(T)6 | 3759  | 3806 |

BM48 dMax30 Total No. of Microsatellites found : 33  
Total No. of Compound Microsatellites found : 3

| No. | Compound SSR            | Start | End  |
|-----|-------------------------|-------|------|
| 1   | (TAT)3-x0-(A)9          | 121   | 139  |
| 2   | (T)7-x17-(CTG)3-x8-(T)6 | 3759  | 3806 |
| 3   | (A)6-x25-(AATT)3        | 4142  | 4183 |

BM48 dMax40 Total No. of Microsatellites found : 33  
Total No. of Compound Microsatellites found : 5

| No. | Compound SSR               | Start | End  |
|-----|----------------------------|-------|------|
| 1   | (GA)3-x31-(TAT)3-x0-(A)9   | 84    | 139  |
| 2   | (GCT)4-x36-(GCT)4          | 675   | 734  |
| 3   | (T)6-x37-(AT)3             | 3105  | 3153 |
| 4   | (T)7-x17-(CTG)3-x8-(T)6    | 3759  | 3806 |
| 5   | (TA)3-x32-(A)6-x25-(AATT)3 | 4104  | 4183 |

BM48 dMax50 Total No. of Microsatellites found : 33  
Total No. of Compound Microsatellites found : 6

| No. | Compound SSR               | Start | End  |
|-----|----------------------------|-------|------|
| 1   | (GA)3-x31-(TAT)3-x0-(A)9   | 84    | 139  |
| 2   | (GCT)4-x36-(GCT)4          | 675   | 734  |
| 3   | (T)6-x37-(AT)3             | 3105  | 3153 |
| 4   | (T)7-x17-(CTG)3-x8-(T)6    | 3759  | 3806 |
| 5   | (TA)3-x32-(A)6-x25-(AATT)3 | 4104  | 4183 |
| 6   | (CA)3-x40-(T)6             | 4236  | 4287 |

## BM49

BM49 dMax10 Total No. of Microsatellites found : 39  
Total No. of Compound Microsatellites found : 5

RESULTS: 1 - 5

| No. | Compound SSR   | Start | End  |
|-----|----------------|-------|------|
| 1   | (TA)4-x-1-(A)8 | 15    | 29   |
| 2   | (TA)4-x-1-(A)8 | 113   | 127  |
| 3   | (T)8-x5-(G)7   | 1897  | 1916 |
| 4   | (T)7-x4-(T)6   | 3744  | 3760 |
| 5   | (T)7-x4-(A)6   | 4830  | 4846 |

BM49 dMax20 Total No. of Microsatellites found : 39  
Total No. of Compound Microsatellites found : 7

| No. | Compound SSR   | Start | End  |
|-----|----------------|-------|------|
| 1   | (TA)4-x-1-(A)8 | 15    | 29   |
| 2   | (TA)4-x-1-(A)8 | 113   | 127  |
| 3   | (A)7-x18-(T)7  | 340   | 371  |
| 4   | (T)8-x5-(G)7   | 1897  | 1916 |
| 5   | (T)7-x4-(T)6   | 3744  | 3760 |
| 6   | (A)9-x16-(A)6  | 4429  | 4459 |

7 (T)7-x4-(A)6 4830 4846

BM49 dMax30 Total No. of Microsatellites found : 39  
Total No. of Compound Microsatellites found : 7

| No. | Compound SSR   | Start | End  |
|-----|----------------|-------|------|
| 1   | (TA)4-x-1-(A)8 | 15    | 29   |
| 2   | (TA)4-x-1-(A)8 | 113   | 127  |
| 3   | (A)7-x18-(T)7  | 340   | 371  |
| 4   | (T)8-x5-(G)7   | 1897  | 1916 |
| 5   | (T)7-x4-(T)6   | 3744  | 3760 |
| 6   | (A)9-x16-(A)6  | 4429  | 4459 |
| 7   | (T)7-x4-(A)6   | 4830  | 4846 |

BM49 dMax40 Total No. of Microsatellites found : 39  
Total No. of Compound Microsatellites found : 9

| No. | Compound SSR      | Start | End  |
|-----|-------------------|-------|------|
| 1   | (TA)4-x-1-(A)8    | 15    | 29   |
| 2   | (TA)4-x-1-(A)8    | 113   | 127  |
| 3   | (A)7-x18-(T)7     | 340   | 371  |
| 4   | (GCT)4-x36-(GCT)4 | 577   | 636  |
| 5   | (T)8-x5-(G)7      | 1897  | 1916 |
| 6   | (T)7-x4-(T)6      | 3744  | 3760 |
| 7   | (T)8-x37-(TCA)3   | 4275  | 4328 |
| 8   | (A)9-x16-(A)6     | 4429  | 4459 |
| 9   | (T)7-x4-(A)6      | 4830  | 4846 |

BM49 dMax50 Total No. of Microsatellites found : 39  
Total No. of Compound Microsatellites found : 10

| No. | Compound SSR           | Start | End  |
|-----|------------------------|-------|------|
| 1   | (TA)4-x-1-(A)8         | 15    | 29   |
| 2   | (TA)4-x-1-(A)8         | 113   | 127  |
| 3   | (A)7-x18-(T)7-x49-(A)7 | 340   | 427  |
| 4   | (GCT)4-x36-(GCT)4      | 577   | 636  |
| 5   | (T)8-x5-(G)7           | 1897  | 1916 |
| 6   | (T)6-x43-(TG)3         | 2627  | 2681 |
| 7   | (T)7-x4-(T)6-x46-(A)7  | 3744  | 3813 |
| 8   | (T)8-x37-(TCA)3        | 4275  | 4328 |
| 9   | (A)9-x16-(A)6          | 4429  | 4459 |
| 10  | (T)7-x4-(A)6           | 4830  | 4846 |

## BM50

BM50 dMax10 Total No. of Microsatellites found : 38  
Total No. of Compound Microsatellites found : 4

| No. | Compound SSR    | Start | End  |
|-----|-----------------|-------|------|
| 1   | (TG)3-x9-(GT)3  | 63    | 83   |
| 2   | (T)6-x4-(AC)3   | 226   | 241  |
| 3   | (CTAA)3-x8-(T)7 | 3331  | 3356 |
| 4   | (TG)3-x6-(T)7   | 3529  | 3547 |

BM50 dMax20 Total No. of Microsatellites found : 38  
Total No. of Compound Microsatellites found : 5

RESULTS: 1 - 5

| No. | Compound SSR | Start | End |
|-----|--------------|-------|-----|
|-----|--------------|-------|-----|

|                   |      |      |
|-------------------|------|------|
| 1 (TG)3-x9-(GT)3  | 63   | 83   |
| 2 (T)6-x4-(AC)3   | 226  | 241  |
| 3 (CTAA)3-x8-(T)7 | 3331 | 3356 |
| 4 (TG)3-x6-(T)7   | 3529 | 3547 |
| 5 (AT)3-x17-(AT)3 | 4639 | 4667 |

BM50 dMax30 Total No. of Microsatellites found : 38  
Total No. of Compound Microsatellites found : 6

| No. | Compound SSR     | Start | End  |
|-----|------------------|-------|------|
| 1   | (TG)3-x9-(GT)3   | 63    | 83   |
| 2   | (T)6-x4-(AC)3    | 226   | 241  |
| 3   | (CAG)4-x28-(TA)3 | 1255  | 1300 |
| 4   | (CTAA)3-x8-(T)7  | 3331  | 3356 |
| 5   | (TG)3-x6-(T)7    | 3529  | 3547 |
| 6   | (AT)3-x17-(AT)3  | 4639  | 4667 |

BM50 dMax40 Total No. of Microsatellites found : 38  
Total No. of Compound Microsatellites found : 7

| No. | Compound SSR            | Start | End  |
|-----|-------------------------|-------|------|
| 1   | (A)7-x33-(TG)3-x9-(GT)3 | 23    | 83   |
| 2   | (T)6-x4-(AC)3           | 226   | 241  |
| 3   | (CAG)4-x28-(TA)3        | 1255  | 1300 |
| 4   | (CTAA)3-x8-(T)7         | 3331  | 3356 |
| 5   | (TG)3-x6-(T)7           | 3529  | 3547 |
| 6   | (A)9-x37-(CA)3          | 4476  | 4527 |
| 7   | (AT)3-x17-(AT)3         | 4639  | 4667 |

BM50 dMax50 Total No. of Microsatellites found : 38  
Total No. of Compound Microsatellites found : 10

| No. | Compound SSR            | Start | End  |
|-----|-------------------------|-------|------|
| 1   | (A)7-x33-(TG)3-x9-(GT)3 | 23    | 83   |
| 2   | (T)6-x4-(AC)3           | 226   | 241  |
| 3   | (CAG)4-x28-(TA)3        | 1255  | 1300 |
| 4   | (T)6-x44-(TA)3          | 2680  | 2735 |
| 5   | (T)6-x42-(T)6           | 2873  | 2926 |
| 6   | (CTAA)3-x8-(T)7         | 3331  | 3356 |
| 7   | (TG)3-x6-(T)7           | 3529  | 3547 |
| 8   | (CAT)3-x43-(TA)3        | 3614  | 3671 |
| 9   | (A)9-x37-(CA)3          | 4476  | 4527 |
| 10  | (AT)3-x17-(AT)3         | 4639  | 4667 |

## BM51

BM51 dMax10 Total No. of Microsatellites found : 26  
Total No. of Compound Microsatellites found : 1

| No. | Compound SSR  | Start | End  |
|-----|---------------|-------|------|
| 1   | (AC)3-x1-(T)7 | 3691  | 3704 |

BM51 dMax20 Total No. of Microsatellites found : 26  
Total No. of Compound Microsatellites found : 1

| No. | Compound SSR  | Start | End  |
|-----|---------------|-------|------|
| 1   | (AC)3-x1-(T)7 | 3691  | 3704 |

BM51 dMax30 Total No. of Microsatellites found : 26  
Total No. of Compound Microsatellites found : 2

| No. | Compound SSR           | Start | End  |
|-----|------------------------|-------|------|
| 1   | (AC)3-x1-(T)7-x29-(T)7 | 3691  | 3740 |
| 2   | (TCT)4-x21-(AC)3       | 4928  | 4966 |

BM51 dMax40 Total No. of Microsatellites found : 26  
Total No. of Compound Microsatellites found : 3

| No. | Compound SSR           | Start | End  |
|-----|------------------------|-------|------|
| 1   | (C)6-x34-(TCCA)3       | 922   | 974  |
| 2   | (AC)3-x1-(T)7-x29-(T)7 | 3691  | 3740 |
| 3   | (A)7-x30-(CT)3         | 4629  | 4671 |

BM51 dMax50 Total No. of Microsatellites found : 26  
Total No. of Compound Microsatellites found : 4

| No. | Compound SSR           | Start | End  |
|-----|------------------------|-------|------|
| 1   | (C)6-x34-(TCCA)3       | 922   | 974  |
| 2   | (AGC)4-x44-(T)7        | 3394  | 3456 |
| 3   | (AC)3-x1-(T)7-x29-(T)7 | 3691  | 3740 |
| 4   | (A)7-x30-(CT)3         | 4629  | 4671 |

## BM52

BM52 dMax10 Total No. of Microsatellites found : 34  
Total No. of Compound Microsatellites found : 4

| No. | Compound SSR             | Start | End  |
|-----|--------------------------|-------|------|
| 1   | (TA)3-x1-(A)6            | 92    | 104  |
| 2   | (A)6-x9-(GC)3            | 1320  | 1340 |
| 3   | (TA)3-x9-(T)6            | 4345  | 4365 |
| 4   | (TCT)4-x9-(CT)3-x0-(TG)3 | 4462  | 4493 |

BM52 dMax20 Total No. of Microsatellites found : 34  
Total No. of Compound Microsatellites found : 5

| No. | Compound SSR             | Start | End  |
|-----|--------------------------|-------|------|
| 1   | (A)7-x13-(TA)3-x1-(A)6   | 72    | 104  |
| 2   | (A)6-x9-(GC)3            | 1320  | 1340 |
| 3   | (T)6-x12-(CA)3           | 4132  | 4155 |
| 4   | (TA)3-x9-(T)6            | 4345  | 4365 |
| 5   | (TCT)4-x9-(CT)3-x0-(TG)3 | 4462  | 4493 |

BM52 dMax30 Total No. of Microsatellites found : 34  
Total No. of Compound Microsatellites found : 5

| No. | Compound SSR                      | Start | End  |
|-----|-----------------------------------|-------|------|
| 1   | (CTG)4-x29-(A)7-x13-(TA)3-x1-(A)6 | 31    | 104  |
| 2   | (A)6-x9-(GC)3                     | 1320  | 1340 |
| 3   | (TCA)4-x28-(T)6-x12-(CA)3         | 4092  | 4155 |
| 4   | (TA)3-x9-(T)6                     | 4345  | 4365 |
| 5   | (TCT)4-x9-(CT)3-x0-(TG)3          | 4462  | 4493 |

BM52 dMax40 Total No. of Microsatellites found : 34  
Total No. of Compound Microsatellites found : 6

| No. | Compound SSR                         | Start | End  |
|-----|--------------------------------------|-------|------|
| 1   | (CTG)4-x29-(A)7-x13-(TA)3-x1-(A)6    | 31    | 104  |
| 2   | (A)6-x9-(GC)3                        | 1320  | 1340 |
| 3   | (T)6-x39-(A)6                        | 2813  | 2863 |
| 4   | (TCA)4-x28-(T)6-x12-(CA)3-x38-(CAA)3 | 4092  | 4203 |
| 5   | (TA)3-x9-(T)6                        | 4345  | 4365 |
| 6   | (TCT)4-x9-(CT)3-x0-(TG)3             | 4462  | 4493 |

BM52 dMax50 Total No. of Microsatellites found : 34  
Total No. of Compound Microsatellites found : 7

| No. | Compound SSR                         | Start | End  |
|-----|--------------------------------------|-------|------|
| 1   | (CTG)4-x29-(A)7-x13-(TA)3-x1-(A)6    | 31    | 104  |
| 2   | (A)6-x9-(GC)3                        | 1320  | 1340 |
| 3   | (T)6-x39-(A)6                        | 2813  | 2863 |
| 4   | (G)6-x47-(CA)3                       | 3309  | 3367 |
| 5   | (TCA)4-x28-(T)6-x12-(CA)3-x38-(CAA)3 | 4092  | 4203 |
| 6   | (TA)3-x9-(T)6                        | 4345  | 4365 |
| 7   | (TCT)4-x9-(CT)3-x0-(TG)3             | 4462  | 4493 |

### BM53

BM53 dMax10 Total No. of Microsatellites found : 32  
Total No. of Compound Microsatellites found : 5

| No. | Compound SSR    | Start | End  |
|-----|-----------------|-------|------|
| 1   | (TC)3-x8-(ACA)5 | 2198  | 2225 |
| 2   | (TA)3-x0-(T)7   | 3011  | 3023 |
| 3   | (CA)3-x0-(TA)3  | 4255  | 4266 |
| 4   | (TC)3-x3-(C)6   | 4662  | 4676 |
| 5   | (A)6-x7-(G)6    | 4731  | 4749 |

BM53 dMax20 Total No. of Microsatellites found : 32  
Total No. of Compound Microsatellites found : 6

| No. | Compound SSR    | Start | End  |
|-----|-----------------|-------|------|
| 1   | (T)7-x16-(T)6   | 264   | 292  |
| 2   | (TC)3-x8-(ACA)5 | 2198  | 2225 |
| 3   | (TA)3-x0-(T)7   | 3011  | 3023 |
| 4   | (CA)3-x0-(TA)3  | 4255  | 4266 |
| 5   | (TC)3-x3-(C)6   | 4662  | 4676 |
| 6   | (A)6-x7-(G)6    | 4731  | 4749 |

BM53 dMax30 Total No. of Microsatellites found : 32  
Total No. of Compound Microsatellites found : 6

| No. | Compound SSR            | Start | End  |
|-----|-------------------------|-------|------|
| 1   | (T)7-x16-(T)6-x26-(TG)3 | 264   | 324  |
| 2   | (TC)3-x8-(ACA)5         | 2198  | 2225 |
| 3   | (TA)3-x0-(T)7           | 3011  | 3023 |
| 4   | (A)6-x20-(CA)3-x0-(TA)3 | 4229  | 4266 |
| 5   | (TC)3-x3-(C)6           | 4662  | 4676 |
| 6   | (A)6-x7-(G)6-x22-(CA)3  | 4731  | 4777 |

BM53 dMax40 Total No. of Microsatellites found : 32  
Total No. of Compound Microsatellites found : 6

| No. | Compound SSR            | Start | End |
|-----|-------------------------|-------|-----|
| 1   | (T)7-x16-(T)6-x26-(TG)3 | 264   | 324 |

|                                   |      |      |
|-----------------------------------|------|------|
| 2 (TC)3-x8-(ACA)5                 | 2198 | 2225 |
| 3 (TA)3-x0-(T)7                   | 3011 | 3023 |
| 4 (A)6-x20-(CA)3-x0-(TA)3         | 4229 | 4266 |
| 5 (TC)3-x3-(C)6                   | 4662 | 4676 |
| 6 (A)6-x7-(G)6-x22-(CA)3-x39-(T)7 | 4731 | 4823 |

BM53 dMax50 Total No. of Microsatellites found : 32  
Total No. of Compound Microsatellites found : 7

| No. | Compound SSR                    | Start | End  |
|-----|---------------------------------|-------|------|
| 1   | (T)7-x16-(T)6-x26-(TG)3         | 264   | 324  |
| 2   | (AT)3-x48-(T)8                  | 1030  | 1091 |
| 3   | (TC)3-x8-(ACA)5                 | 2198  | 2225 |
| 4   | (TA)3-x0-(T)7-x48-(T)8-x46-(T)9 | 3011  | 3134 |
| 5   | (A)6-x20-(CA)3-x0-(TA)3         | 4229  | 4266 |
| 6   | (TC)3-x3-(C)6                   | 4662  | 4676 |
| 7   | (A)6-x7-(G)6-x22-(CA)3-x39-(T)7 | 4731  | 4823 |

## BM54

BM54 dMax10 Total No. of Microsatellites found : 38  
Total No. of Compound Microsatellites found : 1

| No. | Compound SSR  | Start | End  |
|-----|---------------|-------|------|
| 1   | (TG)3-x7-(A)6 | 4214  | 4232 |

BM54 dMax20 Total No. of Microsatellites found : 38  
Total No. of Compound Microsatellites found : 2

| No. | Compound SSR    | Start | End  |
|-----|-----------------|-------|------|
| 1   | (A)6-x12-(CAG)3 | 2044  | 2071 |
| 2   | (TG)3-x7-(A)6   | 4214  | 4232 |

BM54 dMax30 Total No. of Microsatellites found : 38  
Total No. of Compound Microsatellites found : 3

| No. | Compound SSR     | Start | End  |
|-----|------------------|-------|------|
| 1   | (A)6-x12-(CAG)3  | 2044  | 2071 |
| 2   | (TG)3-x7-(A)6    | 4214  | 4232 |
| 3   | (GCAA)3-x29-(A)6 | 4339  | 4386 |

BM54 dMax40 Total No. of Microsatellites found : 38  
Total No. of Compound Microsatellites found : 7

| No. | Compound SSR     | Start | End  |
|-----|------------------|-------|------|
| 1   | (T)7-x31-(GT)3   | 1957  | 2000 |
| 2   | (A)6-x12-(CAG)3  | 2044  | 2071 |
| 3   | (T)6-x31-(TC)3   | 2975  | 3017 |
| 4   | (TG)3-x7-(A)6    | 4214  | 4232 |
| 5   | (GCAA)3-x29-(A)6 | 4339  | 4386 |
| 6   | (T)6-x33-(TCA)3  | 4435  | 4482 |
| 7   | (T)6-x37-(T)7    | 5010  | 5059 |

BM54 dMax50 Total No. of Microsatellites found : 38  
Total No. of Compound Microsatellites found : 6

| No. | Compound SSR                                | Start | End  |
|-----|---------------------------------------------|-------|------|
| 1   | (A)6-x46-(T)7-x31-(GT)3-x43-(A)6-x12-(CAG)3 | 1905  | 2071 |

|                                        |      |      |
|----------------------------------------|------|------|
| 2 (AAC)4-x43-(T)6                      | 2669 | 2729 |
| 3 (T)6-x31-(TC)3                       | 2975 | 3017 |
| 4 (TG)3-x7-(A)6                        | 4214 | 4232 |
| 5 (GCAA)3-x29-(A)6-x48-(T)6-x33-(TCA)3 | 4339 | 4482 |
| 6 (T)6-x37-(T)7                        | 5010 | 5059 |

## BM55

BM55 dMax10 Total No. of Microsatellites found : 27  
Total No. of Compound Microsatellites found : 1

| No. | Compound SSR  | Start | End  |
|-----|---------------|-------|------|
| 1   | (T)6-x9-(TA)3 | 4075  | 4095 |

BM55 dMax20 Total No. of Microsatellites found : 27  
Total No. of Compound Microsatellites found : 2

| No. | Compound SSR                       | Start | End  |
|-----|------------------------------------|-------|------|
| 1   | (T)6-x17-(A)6                      | 3783  | 3811 |
| 2   | (T)6-x14-(T)6-x9-(TA)3-x19-(CTTA)3 | 4055  | 4125 |

BM55 dMax30 Total No. of Microsatellites found : 27  
Total No. of Compound Microsatellites found : 3

| No. | Compound SSR                       | Start | End  |
|-----|------------------------------------|-------|------|
| 1   | (T)6-x17-(A)6                      | 3783  | 3811 |
| 2   | (T)6-x14-(T)6-x9-(TA)3-x19-(CTTA)3 | 4055  | 4125 |
| 3   | (CTT)4-x27-(TTC)4                  | 4187  | 4237 |

BM55 dMax40 Total No. of Microsatellites found : 27  
Total No. of Compound Microsatellites found : 4

| No. | Compound SSR                       | Start | End  |
|-----|------------------------------------|-------|------|
| 1   | (T)8-x37-(T)7                      | 2899  | 2950 |
| 2   | (T)6-x17-(A)6                      | 3783  | 3811 |
| 3   | (T)6-x14-(T)6-x9-(TA)3-x19-(CTTA)3 | 4055  | 4125 |
| 4   | (CTT)4-x27-(TTC)4                  | 4187  | 4237 |

BM55 dMax50 Total No. of Microsatellites found : 27  
Total No. of Compound Microsatellites found : 5

| No. | Compound SSR                       | Start | End  |
|-----|------------------------------------|-------|------|
| 1   | (T)6-x40-(CT)4-x49-(A)10           | 10    | 122  |
| 2   | (T)8-x37-(T)7                      | 2899  | 2950 |
| 3   | (CA)3-x41-(T)6-x17-(A)6            | 3736  | 3811 |
| 4   | (T)6-x14-(T)6-x9-(TA)3-x19-(CTTA)3 | 4055  | 4125 |
| 5   | (CTT)4-x27-(TTC)4                  | 4187  | 4237 |

## BM56

BM56 dMax10 Total No. of Microsatellites found : 22  
Total No. of Compound Microsatellites found : 1

| No. | Compound SSR   | Start | End |
|-----|----------------|-------|-----|
| 1   | (TA)3-x-1-(A)9 | 90    | 103 |

BM56 dMax20 Total No. of Microsatellites found : 22

Total No. of Compound Microsatellites found : 3

| No. | Compound SSR            | Start | End  |
|-----|-------------------------|-------|------|
| 1   | (A)7-x13-(TA)3-x-1-(A)9 | 70    | 103  |
| 2   | (AT)3-x16-(CT)3         | 3861  | 3888 |
| 3   | (TC)3-x18-(G)6          | 4567  | 4596 |

BM56 dMax30 Total No. of Microsatellites found : 22

Total No. of Compound Microsatellites found : 3

| No. | Compound SSR             | Start | End  |
|-----|--------------------------|-------|------|
| 1   | (A)7-x13-(TA)3-x-1-(A)9  | 70    | 103  |
| 2   | (AT)3-x16-(CT)3          | 3861  | 3888 |
| 3   | (TC)3-x18-(G)6-x25-(AT)3 | 4567  | 4627 |

BM56 dMax40 Total No. of Microsatellites found : 22

Total No. of Compound Microsatellites found : 3

| No. | Compound SSR             | Start | End  |
|-----|--------------------------|-------|------|
| 1   | (A)7-x13-(TA)3-x-1-(A)9  | 70    | 103  |
| 2   | (AT)3-x16-(CT)3          | 3861  | 3888 |
| 3   | (TC)3-x18-(G)6-x25-(AT)3 | 4567  | 4627 |

BM56 dMax50 Total No. of Microsatellites found : 22

Total No. of Compound Microsatellites found : 4

| No. | Compound SSR             | Start | End  |
|-----|--------------------------|-------|------|
| 1   | (A)7-x13-(TA)3-x-1-(A)9  | 70    | 103  |
| 2   | (A)6-x46-(AAGG)3         | 2414  | 2478 |
| 3   | (AT)3-x16-(CT)3          | 3861  | 3888 |
| 4   | (TC)3-x18-(G)6-x25-(AT)3 | 4567  | 4627 |

## BM57

BM57 dMax10 Total No. of Microsatellites found : 25

Total No. of Compound Microsatellites found : 2

| No. | Compound SSR   | Start | End  |
|-----|----------------|-------|------|
| 1   | (AT)3-x9-(TC)3 | 2947  | 2967 |
| 2   | (A)8-x1-(A)8   | 4007  | 4023 |

BM57 dMax20 Total No. of Microsatellites found : 25

Total No. of Compound Microsatellites found : 2

| No. | Compound SSR           | Start | End  |
|-----|------------------------|-------|------|
| 1   | (AT)3-x9-(TC)3         | 2947  | 2967 |
| 2   | (A)8-x1-(A)8-x19-(CA)3 | 4007  | 4048 |

BM57 dMax30 Total No. of Microsatellites found : 25

Total No. of Compound Microsatellites found : 4

| No. | Compound SSR           | Start | End  |
|-----|------------------------|-------|------|
| 1   | (CAGG)3-x22-(GA)3      | 1580  | 1619 |
| 2   | (AT)3-x9-(TC)3         | 2947  | 2967 |
| 3   | (A)8-x1-(A)8-x19-(CA)3 | 4007  | 4048 |
| 4   | (A)7-x26-(T)10         | 4674  | 4716 |

BM57 dMax40 Total No. of Microsatellites found : 25  
Total No. of Compound Microsatellites found : 4

| No. | Compound SSR                | Start | End  |
|-----|-----------------------------|-------|------|
| 1   | (AG)3-x31-(CAGG)3-x22-(GA)3 | 1543  | 1619 |
| 2   | (AT)3-x9-(TC)3              | 2947  | 2967 |
| 3   | (A)8-x1-(A)8-x19-(CA)3      | 4007  | 4048 |
| 4   | (A)7-x26-(T)10              | 4674  | 4716 |

BM57 dMax50 Total No. of Microsatellites found : 25  
Total No. of Compound Microsatellites found : 4

| No. | Compound SSR                | Start | End  |
|-----|-----------------------------|-------|------|
| 1   | (AG)3-x31-(CAGG)3-x22-(GA)3 | 1543  | 1619 |
| 2   | (AT)3-x9-(TC)3              | 2947  | 2967 |
| 3   | (A)8-x1-(A)8-x19-(CA)3      | 4007  | 4048 |
| 4   | (T)6-x47-(A)7-x26-(T)10     | 4621  | 4716 |

## BM58

BM58 dMax10 Total No. of Microsatellites found : 31  
Total No. of Compound Microsatellites found : 1

| No. | Compound SSR   | Start | End  |
|-----|----------------|-------|------|
| 1   | (GGA)6-x8-(A)7 | 1719  | 1754 |

BM58 dMax20 Total No. of Microsatellites found : 31  
Total No. of Compound Microsatellites found : 2

| No. | Compound SSR                 | Start | End  |
|-----|------------------------------|-------|------|
| 1   | (CT)3-x11-(A)9               | 99    | 124  |
| 2   | (GGA)6-x8-(A)7-x15-(CCGCTC)3 | 1719  | 1787 |

BM58 dMax30 Total No. of Microsatellites found : 31  
Total No. of Compound Microsatellites found : 3

| No. | Compound SSR                 | Start | End  |
|-----|------------------------------|-------|------|
| 1   | (CT)3-x11-(A)9               | 99    | 124  |
| 2   | (GGA)6-x8-(A)7-x15-(CCGCTC)3 | 1719  | 1787 |
| 3   | (T)6-x21-(AG)3               | 3872  | 3904 |

BM58 dMax40 Total No. of Microsatellites found : 31  
Total No. of Compound Microsatellites found : 5

| No. | Compound SSR                 | Start | End  |
|-----|------------------------------|-------|------|
| 1   | (CT)3-x11-(A)9               | 99    | 124  |
| 2   | (GGA)6-x8-(A)7-x15-(CCGCTC)3 | 1719  | 1787 |
| 3   | (GT)3-x31-(T)6               | 2808  | 2850 |
| 4   | (T)6-x34-(CT)3               | 3761  | 3806 |
| 5   | (T)6-x21-(AG)3               | 3872  | 3904 |

BM58 dMax50 Total No. of Microsatellites found : 31  
Total No. of Compound Microsatellites found : 6

| No. | Compound SSR                 | Start | End  |
|-----|------------------------------|-------|------|
| 1   | (CT)3-x11-(A)9               | 99    | 124  |
| 2   | (GGA)6-x8-(A)7-x15-(CCGCTC)3 | 1719  | 1787 |
| 3   | (GT)3-x31-(T)6               | 2808  | 2850 |
| 4   | (T)6-x34-(CT)3               | 3761  | 3806 |
| 5   | (T)6-x21-(AG)3               | 3872  | 3904 |
| 6   | (C)6-x40-(CT)3               | 4661  | 4712 |

## BM59

BM59 dMax10 Total No. of Microsatellites found : 19  
Total No. of Compound Microsatellites found : 0

BM59 dMax20 Total No. of Microsatellites found : 19  
Total No. of Compound Microsatellites found : 1

| No. | Compound SSR   | Start | End |
|-----|----------------|-------|-----|
| 1   | (GT)3-x13-(T)6 | 389   | 413 |

BM59 dMax30 Total No. of Microsatellites found : 19  
Total No. of Compound Microsatellites found : 2

| No. | Compound SSR    | Start | End |
|-----|-----------------|-------|-----|
| 1   | (A)7-x22-(GCT)3 | 122   | 159 |
| 2   | (GT)3-x13-(T)6  | 389   | 413 |

BM59 dMax40 Total No. of Microsatellites found : 19  
Total No. of Compound Microsatellites found : 2

| No. | Compound SSR    | Start | End |
|-----|-----------------|-------|-----|
| 1   | (A)7-x22-(GCT)3 | 122   | 159 |
| 2   | (GT)3-x13-(T)6  | 389   | 413 |

BM59 dMax50 Total No. of Microsatellites found : 19  
Total No. of Compound Microsatellites found : 2

| No. | Compound SSR                       | Start | End |
|-----|------------------------------------|-------|-----|
| 1   | (T)9-x49-(CT)4-x49-(A)7-x22-(GCT)3 | 7     | 159 |
| 2   | (GT)3-x13-(T)6                     | 389   | 413 |

## BM60

BM60 dMax10 Total No. of Microsatellites found : 24  
Total No. of Compound Microsatellites found : 1

|   |                 |      |      |
|---|-----------------|------|------|
| 1 | (TC)3-x5-(TTC)4 | 3921 | 3943 |
|---|-----------------|------|------|

BM60 dMax20 Total No. of Microsatellites found : 24  
Total No. of Compound Microsatellites found : 3

| No. | Compound SSR    | Start | End  |
|-----|-----------------|-------|------|
| 1   | (T)13-x14-(AT)3 | 2159  | 2191 |
| 2   | (T)6-x14-(T)6   | 3584  | 3609 |
| 3   | (TC)3-x5-(TTC)4 | 3921  | 3943 |

BM60 dMax30 Total No. of Microsatellites found : 24  
Total No. of Compound Microsatellites found : 3

| No. | Compound SSR    | Start | End  |
|-----|-----------------|-------|------|
| 1   | (T)13-x14-(AT)3 | 2159  | 2191 |
| 2   | (T)6-x14-(T)6   | 3584  | 3609 |
| 3   | (TC)3-x5-(TTC)4 | 3921  | 3943 |

BM60 dMax40 Total No. of Microsatellites found : 24  
Total No. of Compound Microsatellites found : 3

| No. | Compound SSR    | Start | End  |
|-----|-----------------|-------|------|
| 1   | (T)13-x14-(AT)3 | 2159  | 2191 |
| 2   | (T)6-x14-(T)6   | 3584  | 3609 |
| 3   | (TC)3-x5-(TTC)4 | 3921  | 3943 |

BM60 dMax50 Total No. of Microsatellites found : 24  
Total No. of Compound Microsatellites found : 3

| No. | Compound SSR    | Start | End  |
|-----|-----------------|-------|------|
| 1   | (T)13-x14-(AT)3 | 2159  | 2191 |
| 2   | (T)6-x14-(T)6   | 3584  | 3609 |
| 3   | (TC)3-x5-(TTC)4 | 3921  | 3943 |

## BM61

BM61 dMax10 Total No. of Microsatellites found : 28  
Total No. of Compound Microsatellites found : 3

| No. | Compound SSR             | Start | End  |
|-----|--------------------------|-------|------|
| 1   | (AGA)4-x2-(AGG)4-x8-(A)8 | 1653  | 1694 |
| 2   | (TA)3-x9-(T)6            | 4144  | 4164 |
| 3   | (T)6-x7-(T)6             | 4259  | 4277 |

BM61 dMax20 Total No. of Microsatellites found : 28  
Total No. of Compound Microsatellites found : 3

| No. | Compound SSR             | Start | End  |
|-----|--------------------------|-------|------|
| 1   | (AGA)4-x2-(AGG)4-x8-(A)8 | 1653  | 1694 |
| 2   | (TA)3-x9-(T)6            | 4144  | 4164 |
| 3   | (T)6-x7-(T)6             | 4259  | 4277 |

BM61 dMax30 Total No. of Microsatellites found : 28  
Total No. of Compound Microsatellites found : 4

| No. | Compound SSR                       | Start | End  |
|-----|------------------------------------|-------|------|
| 1   | (ACT)3-x28-(A)6                    | 293   | 335  |
| 2   | (TC)3-x28-(AGA)4-x2-(AGG)4-x8-(A)8 | 1619  | 1694 |
| 3   | (TA)3-x9-(T)6                      | 4144  | 4164 |
| 4   | (T)6-x7-(T)6                       | 4259  | 4277 |

BM61 dMax40 Total No. of Microsatellites found : 28  
Total No. of Compound Microsatellites found : 4

| No. | Compound SSR    | Start | End |
|-----|-----------------|-------|-----|
| 1   | (ACT)3-x28-(A)6 | 293   | 335 |

|                                                 |      |      |
|-------------------------------------------------|------|------|
| 2 (TC)3-x28-(AGA)4-x2-(AGG)4-x8-(A)8-x30-(TAA)3 | 1619 | 1733 |
| 3 (TA)3-x9-(T)6                                 | 4144 | 4164 |
| 4 (T)6-x7-(T)6                                  | 4259 | 4277 |

BM61 dMax50 Total No. of Microsatellites found : 28  
Total No. of Compound Microsatellites found : 5

| No. | Compound SSR                                  | Start | End  |
|-----|-----------------------------------------------|-------|------|
| 1   | (ACT)3-x28-(A)6                               | 293   | 335  |
| 2   | (TC)3-x28-(AGA)4-x2-(AGG)4-x8-(A)8-x30-(TAA)3 | 1619  | 1733 |
| 3   | (A)6-x44-(C)7                                 | 2293  | 2349 |
| 4   | (TA)3-x9-(T)6                                 | 4144  | 4164 |
| 5   | (T)6-x7-(T)6                                  | 4259  | 4277 |

## BM62

BM62 dMax10 Total No. of Microsatellites found : 32  
Total No. of Compound Microsatellites found : 2

| No. | Compound SSR  | Start | End  |
|-----|---------------|-------|------|
| 1   | (T)6-x5-(A)6  | 3107  | 3123 |
| 2   | (A)6-x2-(AT)3 | 3580  | 3593 |

BM62 dMax20 Total No. of Microsatellites found : 32  
Total No. of Compound Microsatellites found : 2

| No. | Compound SSR  | Start | End  |
|-----|---------------|-------|------|
| 1   | (T)6-x5-(A)6  | 3107  | 3123 |
| 2   | (A)6-x2-(AT)3 | 3580  | 3593 |

BM62 dMax30 Total No. of Microsatellites found : 32  
Total No. of Compound Microsatellites found : 2

| No. | Compound SSR           | Start | End  |
|-----|------------------------|-------|------|
| 1   | (T)6-x5-(A)6           | 3107  | 3123 |
| 2   | (T)7-x25-(A)6-x2-(AT)3 | 3548  | 3593 |

BM62 dMax40 Total No. of Microsatellites found : 32  
Total No. of Compound Microsatellites found : 5

| No. | Compound SSR           | Start | End  |
|-----|------------------------|-------|------|
| 1   | (GCT)4-x36-(GCT)4      | 673   | 732  |
| 2   | (T)6-x5-(A)6           | 3107  | 3123 |
| 3   | (T)7-x25-(A)6-x2-(AT)3 | 3548  | 3593 |
| 4   | (T)7-x35-(T)6          | 3761  | 3808 |
| 5   | (T)6-x39-(TAA)4        | 3894  | 3950 |

BM62 dMax50 Total No. of Microsatellites found : 32  
Total No. of Compound Microsatellites found : 6

| No. | Compound SSR                     | Start | End  |
|-----|----------------------------------|-------|------|
| 1   | (A)7-x48-(T)8                    | 547   | 609  |
| 2   | (GCT)4-x36-(GCT)4                | 673   | 732  |
| 3   | (T)6-x5-(A)6                     | 3107  | 3123 |
| 4   | (T)7-x25-(A)6-x2-(AT)3-x49-(AT)3 | 3548  | 3648 |
| 5   | (T)7-x35-(T)6                    | 3761  | 3808 |
| 6   | (T)6-x39-(TAA)4                  | 3894  | 3950 |

**BM64**

BM64 dMax10 Total No. of Microsatellites found : 35  
Total No. of Compound Microsatellites found : 3

| No. | Compound SSR    | Start | End  |
|-----|-----------------|-------|------|
| 1   | (A)6-x5-(AGA)4  | 1567  | 1589 |
| 2   | (TG)5-x1-(CTC)4 | 4417  | 4439 |
| 3   | (C)6-x9-(CA)3   | 4581  | 4601 |

BM64 dMax20 Total No. of Microsatellites found : 35  
Total No. of Compound Microsatellites found : 3

| No. | Compound SSR             | Start | End  |
|-----|--------------------------|-------|------|
| 1   | (A)6-x5-(AGA)4           | 1567  | 1589 |
| 2   | (T)9-x12-(TG)5-x1-(CTC)4 | 4396  | 4439 |
| 3   | (C)6-x9-(CA)3            | 4581  | 4601 |

BM64 dMax30 Total No. of Microsatellites found : 35  
Total No. of Compound Microsatellites found : 6

| No. | Compound SSR                       | Start | End  |
|-----|------------------------------------|-------|------|
| 1   | (GTGGCA)3-x26-(GT)3                | 497   | 547  |
| 2   | (AT)4-x21-(AG)3                    | 1316  | 1350 |
| 3   | (A)6-x5-(AGA)4-x21-(A)6-x21-(CAG)3 | 1567  | 1646 |
| 4   | (T)9-x12-(TG)5-x1-(CTC)4           | 4396  | 4439 |
| 5   | (C)6-x9-(CA)3-x20-(TC)3            | 4581  | 4627 |
| 6   | (CA)3-x25-(T)6                     | 4730  | 4766 |

BM64 dMax40 Total No. of Microsatellites found : 35  
Total No. of Compound Microsatellites found : 6

| No. | Compound SSR                       | Start | End  |
|-----|------------------------------------|-------|------|
| 1   | (GTGGCA)3-x26-(GT)3                | 497   | 547  |
| 2   | (AT)4-x21-(AG)3                    | 1316  | 1350 |
| 3   | (A)6-x5-(AGA)4-x21-(A)6-x21-(CAG)3 | 1567  | 1646 |
| 4   | (T)9-x12-(TG)5-x1-(CTC)4           | 4396  | 4439 |
| 5   | (C)6-x9-(CA)3-x20-(TC)3            | 4581  | 4627 |
| 6   | (CA)3-x25-(T)6                     | 4730  | 4766 |

BM64 dMax50 Total No. of Microsatellites found : 35  
Total No. of Compound Microsatellites found : 6

| No. | Compound SSR                       | Start | End  |
|-----|------------------------------------|-------|------|
| 1   | (GTGGCA)3-x26-(GT)3                | 497   | 547  |
| 2   | (AT)4-x21-(AG)3                    | 1316  | 1350 |
| 3   | (A)6-x5-(AGA)4-x21-(A)6-x21-(CAG)3 | 1567  | 1646 |
| 4   | (T)9-x12-(TG)5-x1-(CTC)4           | 4396  | 4439 |
| 5   | (C)6-x9-(CA)3-x20-(TC)3            | 4581  | 4627 |
| 6   | (CA)3-x25-(T)6                     | 4730  | 4766 |

**BM65**

BM65 dMax10 Total No. of Microsatellites found : 47  
Total No. of Compound Microsatellites found : 4

| No. | Compound SSR      | Start | End |
|-----|-------------------|-------|-----|
| 1   | (TAAG)3-x0-(GGA)4 | 332   | 354 |

|                     |      |      |
|---------------------|------|------|
| 2 (ATC)4-x-3-(TTC)5 | 2780 | 2803 |
| 3 (TA)3-x9-(T)6     | 4168 | 4188 |
| 4 (TA)3-x6-(TC)3    | 4515 | 4532 |

BM65 dMax20 Total No. of Microsatellites found : 47  
Total No. of Compound Microsatellites found : 8

| No. | Compound SSR               | Start | End  |
|-----|----------------------------|-------|------|
| 1   | (A)6-x15-(GC)3             | 117   | 143  |
| 2   | (TAAG)3-x0-(GGA)4-x11-(A)7 | 332   | 372  |
| 3   | (AGA)4-x18-(A)6            | 1494  | 1529 |
| 4   | (ATC)4-x-3-(TTC)5          | 2780  | 2803 |
| 5   | (TA)3-x9-(T)6              | 4168  | 4188 |
| 6   | (GT)3-x10-(T)9             | 4282  | 4306 |
| 7   | (TA)3-x6-(TC)3             | 4515  | 4532 |
| 8   | (T)7-x16-(AGC)3            | 4676  | 4707 |

BM65 dMax30 Total No. of Microsatellites found : 47  
Total No. of Compound Microsatellites found : 11

| No. | Compound SSR               | Start | End  |
|-----|----------------------------|-------|------|
| 1   | (T)6-x20-(TGC)4-x29-(A)6   | 1     | 73   |
| 2   | (A)6-x15-(GC)3             | 117   | 143  |
| 3   | (TAAG)3-x0-(GGA)4-x11-(A)7 | 332   | 372  |
| 4   | (TA)3-x20-(AG)3            | 1235  | 1266 |
| 5   | (AGA)4-x18-(A)6-x21-(CAG)3 | 1494  | 1559 |
| 6   | (ATC)4-x-3-(TTC)5          | 2780  | 2803 |
| 7   | (A)6-x23-(CT)3             | 2835  | 2869 |
| 8   | (TA)3-x9-(T)6              | 4168  | 4188 |
| 9   | (GT)3-x10-(T)9-x24-(TTC)7  | 4282  | 4351 |
| 10  | (T)6-x27-(TA)3-x6-(TC)3    | 4482  | 4532 |
| 11  | (T)7-x16-(AGC)3            | 4676  | 4707 |

BM65 dMax40 Total No. of Microsatellites found : 47  
Total No. of Compound Microsatellites found : 11

| No. | Compound SSR                                    | Start | End  |
|-----|-------------------------------------------------|-------|------|
| 1   | (T)6-x20-(TGC)4-x29-(A)6                        | 1     | 73   |
| 2   | (A)6-x15-(GC)3                                  | 117   | 143  |
| 3   | (TAAG)3-x0-(GGA)4-x11-(A)7                      | 332   | 372  |
| 4   | (TA)3-x20-(AG)3                                 | 1235  | 1266 |
| 5   | (AGA)4-x18-(A)6-x21-(CAG)3                      | 1494  | 1559 |
| 6   | (A)6-x31-(G)6                                   | 2134  | 2176 |
| 7   | (AGG)4-x30-(ATC)4-x-3-(TTC)5-x31-(A)6-x23-(CT)3 | 2738  | 2869 |
| 8   | (TA)3-x9-(T)6                                   | 4168  | 4188 |
| 9   | (GT)3-x10-(T)9-x24-(TTC)7                       | 4282  | 4351 |
| 10  | (T)6-x27-(TA)3-x6-(TC)3                         | 4482  | 4532 |
| 11  | (T)7-x16-(AGC)3                                 | 4676  | 4707 |

BM65 dMax50 Total No. of Microsatellites found : 47  
Total No. of Compound Microsatellites found : 10

| No. | Compound SSR                                    | Start | End  |
|-----|-------------------------------------------------|-------|------|
| 1   | (T)6-x20-(TGC)4-x29-(A)6-x43-(A)6-x15-(GC)3     | 1     | 143  |
| 2   | (TAAG)3-x0-(GGA)4-x11-(A)7                      | 332   | 372  |
| 3   | (T)6-x40-(TA)3-x20-(AG)3                        | 1189  | 1266 |
| 4   | (AGA)4-x18-(A)6-x21-(CAG)3                      | 1494  | 1559 |
| 5   | (A)6-x31-(G)6                                   | 2134  | 2176 |
| 6   | (AGG)4-x30-(ATC)4-x-3-(TTC)5-x31-(A)6-x23-(CT)3 | 2738  | 2869 |

|                             |      |      |
|-----------------------------|------|------|
| 7 (TA)3-x9-(T)6             | 4168 | 4188 |
| 8 (GT)3-x10-(T)9-x24-(TTC)7 | 4282 | 4351 |
| 9 (T)6-x27-(TA)3-x6-(TC)3   | 4482 | 4532 |
| 10 (T)7-x16-(AGC)3          | 4676 | 4707 |

## BM66

BM66 dMax10 Total No. of Microsatellites found : 25  
Total No. of Compound Microsatellites found : 2

| No. | Compound SSR    | Start | End |
|-----|-----------------|-------|-----|
| 1   | (CCT)3-x-1-(T)9 | 34    | 51  |
| 2   | (TA)6-x-1-(A)8  | 83    | 100 |

BM66 dMax20 Total No. of Microsatellites found : 25  
Total No. of Compound Microsatellites found : 2

| No. | Compound SSR    | Start | End |
|-----|-----------------|-------|-----|
| 1   | (CCT)3-x-1-(T)9 | 34    | 51  |
| 2   | (TA)6-x-1-(A)8  | 83    | 100 |

BM66 dMax30 Total No. of Microsatellites found : 25  
Total No. of Compound Microsatellites found : 2

| No. | Compound SSR    | Start | End |
|-----|-----------------|-------|-----|
| 1   | (CCT)3-x-1-(T)9 | 34    | 51  |
| 2   | (TA)6-x-1-(A)8  | 83    | 100 |

BM66 dMax40 Total No. of Microsatellites found : 25  
Total No. of Compound Microsatellites found : 2

| No. | Compound SSR                       | Start | End  |
|-----|------------------------------------|-------|------|
| 1   | (CCT)3-x-1-(T)9-x31-(TA)6-x-1-(A)8 | 34    | 100  |
| 2   | (A)6-x31-(CA)6                     | 2082  | 2129 |

BM66 dMax50 Total No. of Microsatellites found : 25  
Total No. of Compound Microsatellites found : 2

| No. | Compound SSR                                | Start | End  |
|-----|---------------------------------------------|-------|------|
| 1   | (CCT)3-x-1-(T)9-x31-(TA)6-x-1-(A)8-x44-(G)6 | 34    | 150  |
| 2   | (A)6-x31-(CA)6                              | 2082  | 2129 |

## BM67

BM67 dMax10 Total No. of Microsatellites found : 40  
Total No. of Compound Microsatellites found : 5

| No. | Compound SSR     | Start | End  |
|-----|------------------|-------|------|
| 1   | (CCT)3-x-1-(T)6  | 43    | 57   |
| 2   | (AT)3-x4-(A)7    | 94    | 110  |
| 3   | (TGC)4-x9-(TTA)5 | 1074  | 1109 |
| 4   | (AGA)5-x8-(A)7   | 1704  | 1733 |
| 5   | (T)6-x6-(CTT)4   | 4441  | 4464 |

BM67 dMax20 Total No. of Microsatellites found : 40  
Total No. of Compound Microsatellites found : 7

| No. | Compound SSR | Start | End |
|-----|--------------|-------|-----|
|-----|--------------|-------|-----|

|                             |      |      |
|-----------------------------|------|------|
| 1 (CCT)3-x-1-(T)6           | 43   | 57   |
| 2 (AT)3-x4-(A)7             | 94   | 110  |
| 3 (TGC)4-x9-(TTA)5          | 1074 | 1109 |
| 4 (AGA)5-x8-(A)7            | 1704 | 1733 |
| 5 (A)9-x17-(A)6             | 1922 | 1953 |
| 6 (TGC)4-x18-(AGA)3         | 2485 | 2523 |
| 7 (TTC)4-x11-(T)6-x6-(CTT)4 | 4418 | 4464 |

BM67 dMax30 Total No. of Microsatellites found : 40  
Total No. of Compound Microsatellites found : 8

| No. | Compound SSR                                     | Start | End  |
|-----|--------------------------------------------------|-------|------|
| 1   | (T)7-x28-(CCT)3-x-1-(T)6                         | 8     | 57   |
| 2   | (AT)3-x4-(A)7                                    | 94    | 110  |
| 3   | (TGC)4-x9-(TTA)5                                 | 1074  | 1109 |
| 4   | (CTT)4-x22-(TC)3-x28-(AGA)5-x8-(A)7              | 1636  | 1733 |
| 5   | (A)9-x17-(A)6                                    | 1922  | 1953 |
| 6   | (TGC)4-x18-(AGA)3                                | 2485  | 2523 |
| 7   | (TC)3-x26-(AG)3                                  | 2967  | 3004 |
| 8   | (T)13-x27-(TTC)4-x11-(T)6-x6-(CTT)4-x26-(CAAAA)3 | 4378  | 4505 |

BM67 dMax40 Total No. of Microsatellites found : 40  
Total No. of Compound Microsatellites found : 7

| No. | Compound SSR                                     | Start | End  |
|-----|--------------------------------------------------|-------|------|
| 1   | (T)7-x28-(CCT)3-x-1-(T)6-x36-(AT)3-x4-(A)7       | 8     | 110  |
| 2   | (TGC)4-x9-(TTA)5                                 | 1074  | 1109 |
| 3   | (CTT)4-x22-(TC)3-x28-(AGA)5-x8-(A)7              | 1636  | 1733 |
| 4   | (A)9-x17-(A)6                                    | 1922  | 1953 |
| 5   | (TGC)4-x18-(AGA)3                                | 2485  | 2523 |
| 6   | (TC)3-x26-(AG)3                                  | 2967  | 3004 |
| 7   | (T)13-x27-(TTC)4-x11-(T)6-x6-(CTT)4-x26-(CAAAA)3 | 4378  | 4505 |

BM67 dMax50 Total No. of Microsatellites found : 40  
Total No. of Compound Microsatellites found : 8

| No. | Compound SSR                                     | Start | End  |
|-----|--------------------------------------------------|-------|------|
| 1   | (T)7-x28-(CCT)3-x-1-(T)6-x36-(AT)3-x4-(A)7       | 8     | 110  |
| 2   | (GCT)4-x41-(TGC)4-x9-(TTA)5                      | 1021  | 1109 |
| 3   | (CTT)4-x22-(TC)3-x28-(AGA)5-x8-(A)7              | 1636  | 1733 |
| 4   | (A)9-x17-(A)6                                    | 1922  | 1953 |
| 5   | (TGC)4-x18-(AGA)3                                | 2485  | 2523 |
| 6   | (TC)3-x26-(AG)3                                  | 2967  | 3004 |
| 7   | (AC)3-x45-(A)6                                   | 4056  | 4112 |
| 8   | (T)13-x27-(TTC)4-x11-(T)6-x6-(CTT)4-x26-(CAAAA)3 | 4378  | 4505 |

## BM68

BM68 dMax10 Total No. of Microsatellites found : 46  
Total No. of Compound Microsatellites found : 3

| No. | Compound SSR     | Start | End  |
|-----|------------------|-------|------|
| 1   | (TA)4-x3-(A)7    | 93    | 110  |
| 2   | (TGC)4-x9-(TTA)4 | 1063  | 1095 |
| 3   | (AGA)5-x8-(A)7   | 1693  | 1722 |

BM68 dMax20 Total No. of Microsatellites found : 46  
Total No. of Compound Microsatellites found : 8

| No. | Compound SSR  | Start | End |
|-----|---------------|-------|-----|
| 1   | (TA)4-x3-(A)7 | 93    | 110 |

|                     |      |      |
|---------------------|------|------|
| 2 (TGC)4-x9-(TTA)4  | 1063 | 1095 |
| 3 (AGA)5-x8-(A)7    | 1693 | 1722 |
| 4 (ATA)3-x11-(T)7   | 2950 | 2977 |
| 5 (CA)3-x11-(GCT)3  | 3432 | 3457 |
| 6 (T)6-x17-(A)6     | 4263 | 4291 |
| 7 (TC)3-x13-(T)13   | 4355 | 4386 |
| 8 (TCA)4-x19-(CTT)4 | 4415 | 4457 |

BM68 dMax30 Total No. of Microsatellites found : 46  
Total No. of Compound Microsatellites found : 9

| No. | Compound SSR                                       | Start | End  |
|-----|----------------------------------------------------|-------|------|
| 1   | (TA)4-x3-(A)7                                      | 93    | 110  |
| 2   | (TGC)4-x9-(TTA)4                                   | 1063  | 1095 |
| 3   | (CTT)4-x22-(TC)3-x28-(AGA)5-x8-(A)7                | 1625  | 1722 |
| 4   | (ATA)3-x11-(T)7-x20-(A)6                           | 2950  | 3003 |
| 5   | (T)6-x23-(AT)3                                     | 3089  | 3123 |
| 6   | (CA)3-x11-(GCT)3                                   | 3432  | 3457 |
| 7   | (AC)3-x23-(TTTCA)3                                 | 3527  | 3571 |
| 8   | (T)6-x17-(A)6                                      | 4263  | 4291 |
| 9   | (TC)3-x13-(T)13-x28-(TCA)4-x19-(CTT)4-x26-(CAAAA)3 | 4355  | 4498 |

BM68 dMax40 Total No. of Microsatellites found : 46  
Total No. of Compound Microsatellites found : 9

| No. | Compound SSR                                       | Start | End  |
|-----|----------------------------------------------------|-------|------|
| 1   | (TA)4-x3-(A)7                                      | 93    | 110  |
| 2   | (TGC)4-x9-(TTA)4                                   | 1063  | 1095 |
| 3   | (CTT)4-x22-(TC)3-x28-(AGA)5-x8-(A)7                | 1625  | 1722 |
| 4   | (ATA)3-x11-(T)7-x20-(A)6                           | 2950  | 3003 |
| 5   | (T)6-x23-(AT)3                                     | 3089  | 3123 |
| 6   | (CA)3-x11-(GCT)3                                   | 3432  | 3457 |
| 7   | (AC)3-x23-(TTTCA)3                                 | 3527  | 3571 |
| 8   | (T)6-x17-(A)6                                      | 4263  | 4291 |
| 9   | (TC)3-x13-(T)13-x28-(TCA)4-x19-(CTT)4-x26-(CAAAA)3 | 4355  | 4498 |

BM68 dMax50 Total No. of Microsatellites found : 46  
Total No. of Compound Microsatellites found : 11

| No. | Compound SSR                                       | Start | End  |
|-----|----------------------------------------------------|-------|------|
| 1   | (TA)4-x3-(A)7                                      | 93    | 110  |
| 2   | (TGC)4-x9-(TTA)4                                   | 1063  | 1095 |
| 3   | (CTT)4-x22-(TC)3-x28-(AGA)5-x8-(A)7                | 1625  | 1722 |
| 4   | (AG)3-x43-(T)7                                     | 2092  | 2147 |
| 5   | (ATA)3-x11-(T)7-x20-(A)6                           | 2950  | 3003 |
| 6   | (T)6-x23-(AT)3                                     | 3089  | 3123 |
| 7   | (CA)3-x11-(GCT)3                                   | 3432  | 3457 |
| 8   | (AC)3-x23-(TTTCA)3                                 | 3527  | 3571 |
| 9   | (CA)3-x47-(CTTG)3                                  | 3921  | 3984 |
| 10  | (T)6-x17-(A)6                                      | 4263  | 4291 |
| 11  | (TC)3-x13-(T)13-x28-(TCA)4-x19-(CTT)4-x26-(CAAAA)3 | 4355  | 4498 |

## BM69

BM69 dMax10 Total No. of Microsatellites found : 37  
Total No. of Compound Microsatellites found : 3

| No. | Compound SSR  | Start | End |
|-----|---------------|-------|-----|
| 1   | (TA)3-x1-(A)7 | 102   | 115 |

|                   |      |      |
|-------------------|------|------|
| 2 (TA)3-x4-(AT)3  | 3939 | 3954 |
| 3 (T)6-x5-(GATT)3 | 4120 | 4142 |

BM69 dMax20 Total No. of Microsatellites found : 37  
Total No. of Compound Microsatellites found : 5

| No. | Compound SSR    | Start | End  |
|-----|-----------------|-------|------|
| 1   | (TA)3-x1-(A)7   | 102   | 115  |
| 2   | (T)6-x17-(T)6   | 2960  | 2988 |
| 3   | (TA)3-x4-(AT)3  | 3939  | 3954 |
| 4   | (T)6-x5-(GATT)3 | 4120  | 4142 |
| 5   | (TA)3-x18-(T)6  | 4875  | 4904 |

BM69 dMax30 Total No. of Microsatellites found : 37  
Total No. of Compound Microsatellites found : 7

| No. | Compound SSR             | Start | End  |
|-----|--------------------------|-------|------|
| 1   | (TA)3-x1-(A)7            | 102   | 115  |
| 2   | (ATC)3-x21-(TTC)3        | 2719  | 2757 |
| 3   | (T)6-x17-(T)6            | 2960  | 2988 |
| 4   | (T)7-x28-(ATT)4          | 3626  | 3671 |
| 5   | (CA)3-x27-(TA)3-x4-(AT)3 | 3906  | 3954 |
| 6   | (T)6-x5-(GATT)3          | 4120  | 4142 |
| 7   | (TA)3-x18-(T)6           | 4875  | 4904 |

BM69 dMax40 Total No. of Microsatellites found : 37  
Total No. of Compound Microsatellites found : 7

| No. | Compound SSR             | Start | End  |
|-----|--------------------------|-------|------|
| 1   | (TA)3-x1-(A)7            | 102   | 115  |
| 2   | (ATC)3-x21-(TTC)3        | 2719  | 2757 |
| 3   | (T)6-x17-(T)6            | 2960  | 2988 |
| 4   | (T)7-x28-(ATT)4-x33-(T)6 | 3626  | 3710 |
| 5   | (CA)3-x27-(TA)3-x4-(AT)3 | 3906  | 3954 |
| 6   | (T)6-x5-(GATT)3          | 4120  | 4142 |
| 7   | (TA)3-x18-(T)6           | 4875  | 4904 |

BM69 dMax50 Total No. of Microsatellites found : 37  
Total No. of Compound Microsatellites found : 10

| No. | Compound SSR             | Start | End  |
|-----|--------------------------|-------|------|
| 1   | (CCT)4-x47-(TA)3-x1-(A)7 | 43    | 115  |
| 2   | (A)7-x44-(A)7            | 1557  | 1614 |
| 3   | (ATC)3-x21-(TTC)3        | 2719  | 2757 |
| 4   | (T)6-x17-(T)6            | 2960  | 2988 |
| 5   | (T)7-x28-(ATT)4-x33-(T)6 | 3626  | 3710 |
| 6   | (CAT)4-x47-(T)8          | 3777  | 3842 |
| 7   | (CA)3-x27-(TA)3-x4-(AT)3 | 3906  | 3954 |
| 8   | (T)6-x5-(GATT)3          | 4120  | 4142 |
| 9   | (T)6-x49-(T)6            | 4265  | 4325 |
| 10  | (TA)3-x18-(T)6           | 4875  | 4904 |

## BM70

BM70 dMax10 Total No. of Microsatellites found : 32  
Total No. of Compound Microsatellites found : 5

| No. | Compound SSR | Start | End |
|-----|--------------|-------|-----|
|-----|--------------|-------|-----|

|                   |      |      |
|-------------------|------|------|
| 1 (CT)3-x3-(TCC)3 | 675  | 693  |
| 2 (T)6-x0-(ATT)4  | 2769 | 2785 |
| 3 (TG)3-x6-(TG)3  | 2840 | 2857 |
| 4 (AG)3-x3-(AT)3  | 3073 | 3087 |
| 5 (T)7-x8-(CT)3   | 3818 | 3838 |

BM70 dMax20 Total No. of Microsatellites found : 32  
Total No. of Compound Microsatellites found : 6

| No. | Compound SSR    | Start | End  |
|-----|-----------------|-------|------|
| 1   | (A)7-x19-(A)7   | 73    | 105  |
| 2   | (CT)3-x3-(TCC)3 | 675   | 693  |
| 3   | (T)6-x0-(ATT)4  | 2769  | 2785 |
| 4   | (TG)3-x6-(TG)3  | 2840  | 2857 |
| 5   | (AG)3-x3-(AT)3  | 3073  | 3087 |
| 6   | (T)7-x8-(CT)3   | 3818  | 3838 |

BM70 dMax30 Total No. of Microsatellites found : 32  
Total No. of Compound Microsatellites found : 5

| No. | Compound SSR                               | Start | End  |
|-----|--------------------------------------------|-------|------|
| 1   | (T)6-x26-(GCT)4-x27-(A)7-x19-(A)7          | 2     | 105  |
| 2   | (CT)3-x3-(TCC)3                            | 675   | 693  |
| 3   | (T)6-x0-(ATT)4-x24-(A)6-x24-(TG)3-x6-(TG)3 | 2769  | 2857 |
| 4   | (AG)3-x3-(AT)3                             | 3073  | 3087 |
| 5   | (T)7-x8-(CT)3                              | 3818  | 3838 |

BM70 dMax40 Total No. of Microsatellites found : 32  
Total No. of Compound Microsatellites found : 6

| No. | Compound SSR                               | Start | End  |
|-----|--------------------------------------------|-------|------|
| 1   | (T)6-x26-(GCT)4-x27-(A)7-x19-(A)7          | 2     | 105  |
| 2   | (CT)3-x3-(TCC)3                            | 675   | 693  |
| 3   | (AT)3-x38-(A)6                             | 2314  | 2363 |
| 4   | (T)6-x0-(ATT)4-x24-(A)6-x24-(TG)3-x6-(TG)3 | 2769  | 2857 |
| 5   | (AG)3-x3-(AT)3                             | 3073  | 3087 |
| 6   | (T)7-x8-(CT)3                              | 3818  | 3838 |

BM70 dMax50 Total No. of Microsatellites found : 32  
Total No. of Compound Microsatellites found : 7

| No. | Compound SSR                               | Start | End  |
|-----|--------------------------------------------|-------|------|
| 1   | (T)6-x26-(GCT)4-x27-(A)7-x19-(A)7          | 2     | 105  |
| 2   | (CT)3-x3-(TCC)3                            | 675   | 693  |
| 3   | (GA)3-x46-(T)6                             | 894   | 951  |
| 4   | (AT)3-x38-(A)6                             | 2314  | 2363 |
| 5   | (T)6-x0-(ATT)4-x24-(A)6-x24-(TG)3-x6-(TG)3 | 2769  | 2857 |
| 6   | (AG)3-x3-(AT)3                             | 3073  | 3087 |
| 7   | (T)7-x8-(CT)3-x44-(GT)3                    | 3818  | 3888 |

## BM71

BM71 dMax10 Total No. of Microsatellites found : 25  
Total No. of Compound Microsatellites found : 1

| No. | Compound SSR     | Start | End  |
|-----|------------------|-------|------|
| 1   | (TG)3-x7-(TTTG)3 | 1558  | 1582 |

BM71 dMax20 Total No. of Microsatellites found : 25  
Total No. of Compound Microsatellites found : 1

| No. | Compound SSR     | Start | End  |
|-----|------------------|-------|------|
| 1   | (TG)3-x7-(TTTG)3 | 1558  | 1582 |

BM71 dMax30 Total No. of Microsatellites found : 25  
Total No. of Compound Microsatellites found : 1

| No. | Compound SSR     | Start | End  |
|-----|------------------|-------|------|
| 1   | (TG)3-x7-(TTTG)3 | 1558  | 1582 |

BM71 dMax40 Total No. of Microsatellites found : 25  
Total No. of Compound Microsatellites found : 1

| No. | Compound SSR     | Start | End  |
|-----|------------------|-------|------|
| 1   | (TG)3-x7-(TTTG)3 | 1558  | 1582 |

BM71 dMax50 Total No. of Microsatellites found : 25  
Total No. of Compound Microsatellites found : 2

| No. | Compound SSR     | Start | End  |
|-----|------------------|-------|------|
| 1   | (TC)3-x47-(A)6   | 105   | 163  |
| 2   | (TG)3-x7-(TTTG)3 | 1558  | 1582 |

## BM72

BM72 dMax10 Total No. of Microsatellites found : 31  
Total No. of Compound Microsatellites found : 1

| No. | Compound SSR   | Start | End |
|-----|----------------|-------|-----|
| 1   | (A)8-x0-(GGA)4 | 125   | 144 |

BM72 dMax20 Total No. of Microsatellites found : 31  
Total No. of Compound Microsatellites found : 2

| No. | Compound SSR   | Start | End  |
|-----|----------------|-------|------|
| 1   | (A)8-x0-(GGA)4 | 125   | 144  |
| 2   | (AC)3-x18-(T)6 | 4618  | 4647 |

BM72 dMax30 Total No. of Microsatellites found : 31  
Total No. of Compound Microsatellites found : 3

| No. | Compound SSR             | Start | End  |
|-----|--------------------------|-------|------|
| 1   | (A)8-x0-(GGA)4           | 125   | 144  |
| 2   | (GCA)3-x24-(T)7-x26-(T)7 | 2767  | 2840 |
| 3   | (AC)3-x18-(T)6           | 4618  | 4647 |

BM72 dMax40 Total No. of Microsatellites found : 31  
Total No. of Compound Microsatellites found : 4

| No. | Compound SSR             | Start | End  |
|-----|--------------------------|-------|------|
| 1   | (A)8-x0-(GGA)4           | 125   | 144  |
| 2   | (GCA)3-x24-(T)7-x26-(T)7 | 2767  | 2840 |
| 3   | (T)6-x38-(T)6            | 3796  | 3845 |
| 4   | (AC)3-x18-(T)6           | 4618  | 4647 |

BM72 dMax50 Total No. of Microsatellites found : 31  
Total No. of Compound Microsatellites found : 4

| No. | Compound SSR                              | Start | End  |
|-----|-------------------------------------------|-------|------|
| 1   | (TC)3-x48-(A)8-x0-(GGA)4                  | 71    | 144  |
| 2   | (GCA)3-x24-(T)7-x26-(T)7                  | 2767  | 2840 |
| 3   | (T)6-x45-(CT)3-x46-(T)6-x38-(T)6-x45-(A)6 | 3693  | 3896 |
| 4   | (AC)3-x18-(T)6                            | 4618  | 4647 |

## BM73

BM73 dMax10 Total No. of Microsatellites found : 26  
Total No. of Compound Microsatellites found : 3

| No. | Compound SSR   | Start | End  |
|-----|----------------|-------|------|
| 1   | (TA)3-x1-(A)6  | 112   | 124  |
| 2   | (A)6-x0-(GT)3  | 1416  | 1427 |
| 3   | (AT)6-x-1-(T)6 | 4611  | 4626 |

BM73 dMax20 Total No. of Microsatellites found : 26  
Total No. of Compound Microsatellites found : 5

| No. | Compound SSR    | Start | End  |
|-----|-----------------|-------|------|
| 1   | (TA)3-x1-(A)6   | 112   | 124  |
| 2   | (T)7-x12-(GAA)4 | 1312  | 1342 |
| 3   | (A)6-x0-(GT)3   | 1416  | 1427 |
| 4   | (T)7-x10-(T)7   | 2961  | 2984 |
| 5   | (AT)6-x-1-(T)6  | 4611  | 4626 |

BM73 dMax30 Total No. of Microsatellites found : 26  
Total No. of Compound Microsatellites found : 6

| No. | Compound SSR    | Start | End  |
|-----|-----------------|-------|------|
| 1   | (TA)3-x1-(A)6   | 112   | 124  |
| 2   | (T)6-x20-(TA)3  | 1188  | 1219 |
| 3   | (T)7-x12-(GAA)4 | 1312  | 1342 |
| 4   | (A)6-x0-(GT)3   | 1416  | 1427 |
| 5   | (T)7-x10-(T)7   | 2961  | 2984 |
| 6   | (AT)6-x-1-(T)6  | 4611  | 4626 |

BM73 dMax40 Total No. of Microsatellites found : 26  
Total No. of Compound Microsatellites found : 9

| No. | Compound SSR              | Start | End  |
|-----|---------------------------|-------|------|
| 1   | (TA)3-x1-(A)6             | 112   | 124  |
| 2   | (CTT)4-x36-(TA)3          | 612   | 665  |
| 3   | (T)6-x20-(TA)3            | 1188  | 1219 |
| 4   | (T)7-x12-(GAA)4           | 1312  | 1342 |
| 5   | (A)6-x0-(GT)3             | 1416  | 1427 |
| 6   | (T)7-x10-(T)7             | 2961  | 2984 |
| 7   | (AT)3-x34-(T)6            | 3353  | 3398 |
| 8   | (A)7-x30-(AGCA)3-x36-(A)7 | 4340  | 4432 |
| 9   | (AT)6-x-1-(T)6            | 4611  | 4626 |

BM73 dMax50 Total No. of Microsatellites found : 26  
Total No. of Compound Microsatellites found : 9

| No. | Compound SSR | Start | End |
|-----|--------------|-------|-----|
|-----|--------------|-------|-----|

|                             |      |      |
|-----------------------------|------|------|
| 1 (TA)3-x1-(A)6             | 112  | 124  |
| 2 (CTT)4-x36-(TA)3          | 612  | 665  |
| 3 (T)6-x20-(TA)3            | 1188 | 1219 |
| 4 (T)7-x12-(GAA)4           | 1312 | 1342 |
| 5 (A)6-x0-(GT)3             | 1416 | 1427 |
| 6 (T)7-x10-(T)7             | 2961 | 2984 |
| 7 (AT)3-x34-(T)6            | 3353 | 3398 |
| 8 (A)7-x30-(AGCA)3-x36-(A)7 | 4340 | 4432 |
| 9 (AT)6-x-1-(T)6            | 4611 | 4626 |

## BM74

BM74 dMax10 Total No. of Microsatellites found : 26  
Total No. of Compound Microsatellites found : 1

| No. | Compound SSR           | Start | End |
|-----|------------------------|-------|-----|
| 1   | (AT)3-x3-(A)6-x6-(TG)3 | 59    | 87  |

BM74 dMax20 Total No. of Microsatellites found : 26  
Total No. of Compound Microsatellites found : 4

| No. | Compound SSR           | Start | End  |
|-----|------------------------|-------|------|
| 1   | (AT)3-x3-(A)6-x6-(TG)3 | 59    | 87   |
| 2   | (T)8-x14-(AC)3         | 2878  | 2905 |
| 3   | (CT)3-x11-(AT)3        | 3509  | 3531 |
| 4   | (T)6-x17-(TCA)3        | 4059  | 4090 |

BM74 dMax30 Total No. of Microsatellites found : 26  
Total No. of Compound Microsatellites found : 5

| No. | Compound SSR           | Start | End  |
|-----|------------------------|-------|------|
| 1   | (AT)3-x3-(A)6-x6-(TG)3 | 59    | 87   |
| 2   | (T)8-x14-(AC)3         | 2878  | 2905 |
| 3   | (T)6-x28-(ATT)4        | 3402  | 3446 |
| 4   | (CT)3-x11-(AT)3        | 3509  | 3531 |
| 5   | (T)6-x17-(TCA)3        | 4059  | 4090 |

BM74 dMax40 Total No. of Microsatellites found : 26  
Total No. of Compound Microsatellites found : 6

| No. | Compound SSR           | Start | End  |
|-----|------------------------|-------|------|
| 1   | (AT)3-x3-(A)6-x6-(TG)3 | 59    | 87   |
| 2   | (T)8-x14-(AC)3         | 2878  | 2905 |
| 3   | (T)6-x28-(ATT)4        | 3402  | 3446 |
| 4   | (CT)3-x11-(AT)3        | 3509  | 3531 |
| 5   | (T)6-x17-(TCA)3        | 4059  | 4090 |
| 6   | (T)7-x33-(AC)3         | 4366  | 4411 |

BM74 dMax50 Total No. of Microsatellites found : 26  
Total No. of Compound Microsatellites found : 7

| No. | Compound SSR           | Start | End  |
|-----|------------------------|-------|------|
| 1   | (AT)3-x3-(A)6-x6-(TG)3 | 59    | 87   |
| 2   | (T)8-x14-(AC)3         | 2878  | 2905 |
| 3   | (T)6-x28-(ATT)4        | 3402  | 3446 |
| 4   | (CT)3-x11-(AT)3        | 3509  | 3531 |
| 5   | (TA)3-x42-(A)6         | 3914  | 3967 |
| 6   | (T)6-x17-(TCA)3        | 4059  | 4090 |
| 7   | (T)7-x33-(AC)3         | 4366  | 4411 |

**BM75**

BM75 dMax10 Total No. of Microsatellites found : 21  
Total No. of Compound Microsatellites found : 1

| No. | Compound SSR  | Start | End |
|-----|---------------|-------|-----|
| 1   | (AG)3-x5-(T)6 | 48    | 64  |

BM75 dMax20 Total No. of Microsatellites found : 21  
Total No. of Compound Microsatellites found : 2

| No. | Compound SSR    | Start | End |
|-----|-----------------|-------|-----|
| 1   | (AG)3-x5-(T)6   | 48    | 64  |
| 2   | (C)6-x19-(GAT)3 | 793   | 828 |

BM75 dMax30 Total No. of Microsatellites found : 21  
Total No. of Compound Microsatellites found : 2

| No. | Compound SSR    | Start | End |
|-----|-----------------|-------|-----|
| 1   | (AG)3-x5-(T)6   | 48    | 64  |
| 2   | (C)6-x19-(GAT)3 | 793   | 828 |

BM75 dMax40 Total No. of Microsatellites found : 21  
Total No. of Compound Microsatellites found : 3

| No. | Compound SSR      | Start | End  |
|-----|-------------------|-------|------|
| 1   | (AG)3-x5-(T)6     | 48    | 64   |
| 2   | (C)6-x19-(GAT)3   | 793   | 828  |
| 3   | (GCT)4-x35-(AGC)4 | 1124  | 1182 |

BM75 dMax50 Total No. of Microsatellites found : 21  
Total No. of Compound Microsatellites found : 4

| No. | Compound SSR      | Start | End  |
|-----|-------------------|-------|------|
| 1   | (AG)3-x5-(T)6     | 48    | 64   |
| 2   | (A)6-x48-(AT)3    | 121   | 180  |
| 3   | (C)6-x19-(GAT)3   | 793   | 828  |
| 4   | (GCT)4-x35-(AGC)4 | 1124  | 1182 |

**BM76**

BM76 dMax10 Total No. of Microsatellites found : 21  
Total No. of Compound Microsatellites found : 0

BM76 dMax20 Total No. of Microsatellites found : 21  
Total No. of Compound Microsatellites found : 0

BM76 dMax30 Total No. of Microsatellites found : 21  
Total No. of Compound Microsatellites found : 0

BM76 dMax40 Total No. of Microsatellites found : 21  
Total No. of Compound Microsatellites found : 2

| No. | Compound SSR    | End  | Start |
|-----|-----------------|------|-------|
| 1   | (GT)3-x38-(C)6  | 2915 | 2866  |
| 2   | (AT)3-x39-(AT)3 | 3651 | 3601  |

BM76 dMax50 Total No. of Microsatellites found : 21  
Total No. of Compound Microsatellites found : 3

| No. | Compound SSR    | End  | Start |
|-----|-----------------|------|-------|
| 1   | (A)7-x47-(C)6   | 2103 | 2044  |
| 2   | (GT)3-x38-(C)6  | 2915 | 2866  |
| 3   | (AT)3-x39-(AT)3 | 3651 | 3601  |

## BM77

BM77 dMax10 Total No. of Microsatellites found : 24  
Total No. of Compound Microsatellites found : 1

| No. | Compound SSR | Start | End  |
|-----|--------------|-------|------|
| 1   | (C)6-x1-(A)6 | 2027  | 2039 |

BM77 dMax20 Total No. of Microsatellites found : 24  
Total No. of Compound Microsatellites found : 2

| No. | Compound SSR   | Start | End  |
|-----|----------------|-------|------|
| 1   | (C)6-x15-(GT)3 | 389   | 415  |
| 2   | (C)6-x1-(A)6   | 2027  | 2039 |

BM77 dMax30 Total No. of Microsatellites found : 24  
Total No. of Compound Microsatellites found : 3

| No. | Compound SSR   | Start | End  |
|-----|----------------|-------|------|
| 1   | (C)6-x15-(GT)3 | 389   | 415  |
| 2   | (C)6-x26-(C)6  | 609   | 646  |
| 3   | (C)6-x1-(A)6   | 2027  | 2039 |

BM77 dMax40 Total No. of Microsatellites found : 24  
Total No. of Compound Microsatellites found : 3

| No. | Compound SSR   | Start | End  |
|-----|----------------|-------|------|
| 1   | (C)6-x15-(GT)3 | 389   | 415  |
| 2   | (C)6-x26-(C)6  | 609   | 646  |
| 3   | (C)6-x1-(A)6   | 2027  | 2039 |

BM77 dMax50 Total No. of Microsatellites found : 24  
Total No. of Compound Microsatellites found : 3

| No. | Compound SSR   | Start | End  |
|-----|----------------|-------|------|
| 1   | (C)6-x15-(GT)3 | 389   | 415  |
| 2   | (C)6-x26-(C)6  | 609   | 646  |
| 3   | (C)6-x1-(A)6   | 2027  | 2039 |

## BM78

BM78 dMax10 Total No. of Microsatellites found : 21  
Total No. of Compound Microsatellites found : 3

| No. | Compound SSR | Start | End |
|-----|--------------|-------|-----|
|-----|--------------|-------|-----|

|                   |      |      |
|-------------------|------|------|
| 1 (AT)3-x0-(TC)3  | 1334 | 1345 |
| 2 (TA)3-x8-(AGC)3 | 2593 | 2615 |
| 3 (A)7-x6-(C)6    | 4293 | 4311 |

BM78 dMax20 Total No. of Microsatellites found : 21  
Total No. of Compound Microsatellites found : 3

| No. | Compound SSR    | Start | End  |
|-----|-----------------|-------|------|
| 1   | (AT)3-x0-(TC)3  | 1334  | 1345 |
| 2   | (TA)3-x8-(AGC)3 | 2593  | 2615 |
| 3   | (A)7-x6-(C)6    | 4293  | 4311 |

BM78 dMax30 Total No. of Microsatellites found : 21  
Total No. of Compound Microsatellites found : 3

| No. | Compound SSR    | Start | End  |
|-----|-----------------|-------|------|
| 1   | (AT)3-x0-(TC)3  | 1334  | 1345 |
| 2   | (TA)3-x8-(AGC)3 | 2593  | 2615 |
| 3   | (A)7-x6-(C)6    | 4293  | 4311 |

BM78 dMax40 Total No. of Microsatellites found : 21  
Total No. of Compound Microsatellites found : 4

| No. | Compound SSR    | Start | End  |
|-----|-----------------|-------|------|
| 1   | (AT)3-x0-(TC)3  | 1334  | 1345 |
| 2   | (TA)3-x8-(AGC)3 | 2593  | 2615 |
| 3   | (T)6-x36-(T)6   | 4194  | 4241 |
| 4   | (A)7-x6-(C)6    | 4293  | 4311 |

BM78 dMax50 Total No. of Microsatellites found : 21  
Total No. of Compound Microsatellites found : 4

| No. | Compound SSR    | Start | End  |
|-----|-----------------|-------|------|
| 1   | (AT)3-x0-(TC)3  | 1334  | 1345 |
| 2   | (TA)3-x8-(AGC)3 | 2593  | 2615 |
| 3   | (T)6-x36-(T)6   | 4194  | 4241 |
| 4   | (A)7-x6-(C)6    | 4293  | 4311 |

## BM79

BM79 dMax10 Total No. of Microsatellites found : 33  
Total No. of Compound Microsatellites found : 2

| No. | Compound SSR   | Start | End  |
|-----|----------------|-------|------|
| 1   | (TA)3-x0-(T)6  | 30    | 41   |
| 2   | (CT)3-x2-(TA)3 | 1365  | 1378 |

BM79 dMax20 Total No. of Microsatellites found : 33  
Total No. of Compound Microsatellites found : 5

| No. | Compound SSR     | Start | End  |
|-----|------------------|-------|------|
| 1   | (TA)3-x0-(T)6    | 30    | 41   |
| 2   | (CT)3-x2-(TA)3   | 1365  | 1378 |
| 3   | (GT)4-x14-(GT)3  | 3006  | 3033 |
| 4   | (T)6-x10-(AC)3   | 4276  | 4297 |
| 5   | (ATTA)3-x10-(T)6 | 5015  | 5042 |

BM79 dMax30 Total No. of Microsatellites found : 33  
Total No. of Compound Microsatellites found : 6

| No. | Compound SSR            | Start | End  |
|-----|-------------------------|-------|------|
| 1   | (TA)3-x0-(T)6           | 30    | 41   |
| 2   | (CT)3-x2-(TA)3          | 1365  | 1378 |
| 3   | (GT)4-x14-(GT)3         | 3006  | 3033 |
| 4   | (TC)3-x29-(CAG)3        | 3586  | 3630 |
| 5   | (T)6-x10-(AC)3-x20-(T)6 | 4276  | 4323 |
| 6   | (ATTA)3-x10-(T)6        | 5015  | 5042 |

BM79 dMax40 Total No. of Microsatellites found : 33  
Total No. of Compound Microsatellites found : 6

| No. | Compound SSR              | Start | End  |
|-----|---------------------------|-------|------|
| 1   | (TA)3-x0-(T)6-x39-(AAGG)3 | 30    | 91   |
| 2   | (CT)3-x2-(TA)3            | 1365  | 1378 |
| 3   | (GT)4-x14-(GT)3           | 3006  | 3033 |
| 4   | (TC)3-x29-(CAG)3          | 3586  | 3630 |
| 5   | (T)6-x10-(AC)3-x20-(T)6   | 4276  | 4323 |
| 6   | (ATTA)3-x10-(T)6          | 5015  | 5042 |

BM79 dMax50 Total No. of Microsatellites found : 33  
Total No. of Compound Microsatellites found : 6

| No. | Compound SSR              | Start | End  |
|-----|---------------------------|-------|------|
| 1   | (TA)3-x0-(T)6-x39-(AAGG)3 | 30    | 91   |
| 2   | (CT)3-x2-(TA)3-x44-(AT)3  | 1365  | 1428 |
| 3   | (GT)4-x14-(GT)3           | 3006  | 3033 |
| 4   | (TC)3-x29-(CAG)3          | 3586  | 3630 |
| 5   | (T)6-x10-(AC)3-x20-(T)6   | 4276  | 4323 |
| 6   | (ATTA)3-x10-(T)6          | 5015  | 5042 |

## BM80

BM80 dMax10 Total No. of Microsatellites found : 18  
Total No. of Compound Microsatellites found : 1

| No. | Compound SSR | Start | End  |
|-----|--------------|-------|------|
| 1   | (A)6-x8-(A)6 | 2084  | 2103 |

BM80 dMax20 Total No. of Microsatellites found : 18  
Total No. of Compound Microsatellites found : 1

| No. | Compound SSR | Start | End  |
|-----|--------------|-------|------|
| 1   | (A)6-x8-(A)6 | 2084  | 2103 |

BM80 dMax30 Total No. of Microsatellites found : 18  
Total No. of Compound Microsatellites found : 2

| No. | Compound SSR     | Start | End  |
|-----|------------------|-------|------|
| 1   | (ATA)3-x27-(AT)3 | 82    | 123  |
| 2   | (A)6-x8-(A)6     | 2084  | 2103 |

BM80 dMax40 Total No. of Microsatellites found : 18  
Total No. of Compound Microsatellites found : 2

| No. | Compound SSR              | Start | End  |
|-----|---------------------------|-------|------|
| 1   | (T)6-x36-(ATA)3-x27-(AT)3 | 40    | 123  |
| 2   | (A)6-x8-(A)6              | 2084  | 2103 |

BM80 dMax50 Total No. of Microsatellites found : 18  
Total No. of Compound Microsatellites found : 2

| No. | Compound SSR              | Start | End  |
|-----|---------------------------|-------|------|
| 1   | (T)6-x36-(ATA)3-x27-(AT)3 | 40    | 123  |
| 2   | (A)6-x8-(A)6              | 2084  | 2103 |

## BM81

BM81 dMax10 Total No. of Microsatellites found : 20  
Total No. of Compound Microsatellites found : 2

| No. | Compound SSR    | Start | End  |
|-----|-----------------|-------|------|
| 1   | (C)6-x0-(GA)3   | 2498  | 2509 |
| 2   | (TTC)5-x1-(CA)4 | 2850  | 2873 |

BM81 dMax20 Total No. of Microsatellites found : 20  
Total No. of Compound Microsatellites found : 2

| No. | Compound SSR    | Start | End  |
|-----|-----------------|-------|------|
| 1   | (C)6-x0-(GA)3   | 2498  | 2509 |
| 2   | (TTC)5-x1-(CA)4 | 2850  | 2873 |

BM81 dMax30 Total No. of Microsatellites found : 20  
Total No. of Compound Microsatellites found : 2

| No. | Compound SSR           | Start | End  |
|-----|------------------------|-------|------|
| 1   | (A)6-x20-(C)6-x0-(GA)3 | 2472  | 2509 |
| 2   | (TTC)5-x1-(CA)4        | 2850  | 2873 |

BM81 dMax40 Total No. of Microsatellites found : 20  
Total No. of Compound Microsatellites found : 2

| No. | Compound SSR           | Start | End  |
|-----|------------------------|-------|------|
| 1   | (A)6-x20-(C)6-x0-(GA)3 | 2472  | 2509 |
| 2   | (TTC)5-x1-(CA)4        | 2850  | 2873 |

BM81 dMax50 Total No. of Microsatellites found : 20  
Total No. of Compound Microsatellites found : 3

| No. | Compound SSR           | Start | End  |
|-----|------------------------|-------|------|
| 1   | (A)6-x20-(C)6-x0-(GA)3 | 2472  | 2509 |
| 2   | (TTC)5-x1-(CA)4        | 2850  | 2873 |
| 3   | (AT)3-x40-(G)6         | 3126  | 3177 |

## BM82

BM82 dMax10 Total No. of Microsatellites found : 21  
Total No. of Compound Microsatellites found : 0

BM82 dMax20 Total No. of Microsatellites found : 21  
Total No. of Compound Microsatellites found : 0

BM82 dMax30 Total No. of Microsatellites found : 21  
Total No. of Compound Microsatellites found : 1

| No. | Compound SSR     | Start | End |
|-----|------------------|-------|-----|
| 1   | (ATA)3-x27-(AT)3 | 82    | 123 |

BM82 dMax40 Total No. of Microsatellites found : 21  
Total No. of Compound Microsatellites found : 3

| No. | Compound SSR              | Start | End  |
|-----|---------------------------|-------|------|
| 1   | (T)6-x36-(ATA)3-x27-(AT)3 | 40    | 123  |
| 2   | (G)6-x30-(CT)3            | 3558  | 3599 |
| 3   | (AT)3-x32-(TC)3           | 3723  | 3766 |

BM82 dMax50 Total No. of Microsatellites found : 21  
Total No. of Compound Microsatellites found : 3

| No. | Compound SSR              | Start | End  |
|-----|---------------------------|-------|------|
| 1   | (T)6-x36-(ATA)3-x27-(AT)3 | 40    | 123  |
| 2   | (G)6-x30-(CT)3            | 3558  | 3599 |
| 3   | (AT)3-x32-(TC)3           | 3723  | 3766 |

## BM83

BM83 dMax10 Total No. of Microsatellites found : 29  
Total No. of Compound Microsatellites found : 2

| No. | Compound SSR   | Start | End  |
|-----|----------------|-------|------|
| 1   | (GA)3-x5-(T)6  | 4725  | 4741 |
| 2   | (AT)3-x6-(AT)3 | 5075  | 5092 |

BM83 dMax20 Total No. of Microsatellites found : 29  
Total No. of Compound Microsatellites found : 3

| No. | Compound SSR   | Start | End  |
|-----|----------------|-------|------|
| 1   | (C)8-x10-(C)6  | 3123  | 3146 |
| 2   | (GA)3-x5-(T)6  | 4725  | 4741 |
| 3   | (AT)3-x6-(AT)3 | 5075  | 5092 |

BM83 dMax30 Total No. of Microsatellites found : 29  
Total No. of Compound Microsatellites found : 4

| No. | Compound SSR   | Start | End  |
|-----|----------------|-------|------|
| 1   | (T)7-x27-(CA)3 | 40    | 79   |
| 2   | (C)8-x10-(C)6  | 3123  | 3146 |
| 3   | (GA)3-x5-(T)6  | 4725  | 4741 |
| 4   | (AT)3-x6-(AT)3 | 5075  | 5092 |

BM83 dMax40 Total No. of Microsatellites found : 29  
Total No. of Compound Microsatellites found : 5

| No. | Compound SSR    | Start | End  |
|-----|-----------------|-------|------|
| 1   | (T)7-x27-(CA)3  | 40    | 79   |
| 2   | (C)8-x10-(C)6   | 3123  | 3146 |
| 3   | (TTC)3-x35-(T)7 | 4549  | 4599 |
| 4   | (GA)3-x5-(T)6   | 4725  | 4741 |
| 5   | (AT)3-x6-(AT)3  | 5075  | 5092 |

BM83 dMax50 Total No. of Microsatellites found : 29  
 Total No. of Compound Microsatellites found : 5

| No. | Compound SSR    | Start | End  |
|-----|-----------------|-------|------|
| 1   | (T)7-x27-(CA)3  | 40    | 79   |
| 2   | (C)8-x10-(C)6   | 3123  | 3146 |
| 3   | (TTC)3-x35-(T)7 | 4549  | 4599 |
| 4   | (GA)3-x5-(T)6   | 4725  | 4741 |
| 5   | (AT)3-x6-(AT)3  | 5075  | 5092 |

## BM84

BM84 dMax10 Total No. of Microsatellites found : 31  
 Total No. of Compound Microsatellites found : 7

| No. | Compound SSR           | Start | End  |
|-----|------------------------|-------|------|
| 1   | (TA)3-x1-(A)8          | 82    | 96   |
| 2   | (TC)3-x7-(TC)3         | 128   | 146  |
| 3   | (AT)3-x-1-(T)6         | 1012  | 1022 |
| 4   | (C)7-x0-(A)6           | 1566  | 1578 |
| 5   | (TAA)4-x0-(G)6         | 1613  | 1629 |
| 6   | (TA)3-x1-(CAG)3        | 2333  | 2350 |
| 7   | (TA)3-x6-(T)6-x5-(TA)3 | 4370  | 4398 |

BM84 dMax20 Total No. of Microsatellites found : 31  
 Total No. of Compound Microsatellites found : 9

| No. | Compound SSR           | Start | End  |
|-----|------------------------|-------|------|
| 1   | (TA)3-x1-(A)8          | 82    | 96   |
| 2   | (TC)3-x7-(TC)3         | 128   | 146  |
| 3   | (AT)3-x-1-(T)6         | 1012  | 1022 |
| 4   | (C)6-x19-(AG)3         | 1292  | 1322 |
| 5   | (C)7-x0-(A)6           | 1566  | 1578 |
| 6   | (TAA)4-x0-(G)6         | 1613  | 1629 |
| 7   | (TA)3-x1-(CAG)3        | 2333  | 2350 |
| 8   | (TCT)3-x11-(A)7        | 3783  | 3812 |
| 9   | (TA)3-x6-(T)6-x5-(TA)3 | 4370  | 4398 |

BM84 dMax30 Total No. of Microsatellites found : 31  
 Total No. of Compound Microsatellites found : 10

| No. | Compound SSR           | Start | End  |
|-----|------------------------|-------|------|
| 1   | (TA)3-x1-(A)8          | 82    | 96   |
| 2   | (TC)3-x7-(TC)3         | 128   | 146  |
| 3   | (AT)3-x-1-(T)6         | 1012  | 1022 |
| 4   | (C)6-x19-(AG)3         | 1292  | 1322 |
| 5   | (C)7-x0-(A)6           | 1566  | 1578 |
| 6   | (TAA)4-x0-(G)6         | 1613  | 1629 |
| 7   | (TA)3-x1-(CAG)3        | 2333  | 2350 |
| 8   | (T)7-x29-(TA)3         | 2878  | 2919 |
| 9   | (TCT)3-x11-(A)7        | 3783  | 3812 |
| 10  | (TA)3-x6-(T)6-x5-(TA)3 | 4370  | 4398 |

BM84 dMax40 Total No. of Microsatellites found : 31  
 Total No. of Compound Microsatellites found : 8

| No. | Compound SSR                     | Start | End |
|-----|----------------------------------|-------|-----|
| 1   | (TA)3-x1-(A)8-x31-(TC)3-x7-(TC)3 | 82    | 146 |

|                                   |      |      |
|-----------------------------------|------|------|
| 2 (AT)3-x-1-(T)6                  | 1012 | 1022 |
| 3 (C)6-x19-(AG)3                  | 1292 | 1322 |
| 4 (C)7-x0-(A)6-x34-(TAA)4-x0-(G)6 | 1566 | 1629 |
| 5 (TA)3-x1-(CAG)3                 | 2333 | 2350 |
| 6 (T)7-x29-(TA)3                  | 2878 | 2919 |
| 7 (TCT)3-x11-(A)7                 | 3783 | 3812 |
| 8 (TA)3-x6-(T)6-x5-(TA)3          | 4370 | 4398 |

BM84 dMax50 Total No. of Microsatellites found : 31  
Total No. of Compound Microsatellites found : 8

| No. | Compound SSR                     | Start | End  |
|-----|----------------------------------|-------|------|
| 1   | (TA)3-x1-(A)8-x31-(TC)3-x7-(TC)3 | 82    | 146  |
| 2   | (AT)3-x-1-(T)6                   | 1012  | 1022 |
| 3   | (C)6-x19-(AG)3                   | 1292  | 1322 |
| 4   | (C)7-x0-(A)6-x34-(TAA)4-x0-(G)6  | 1566  | 1629 |
| 5   | (TA)3-x1-(CAG)3                  | 2333  | 2350 |
| 6   | (T)7-x29-(TA)3                   | 2878  | 2919 |
| 7   | (TCT)3-x11-(A)7                  | 3783  | 3812 |
| 8   | (TA)3-x6-(T)6-x5-(TA)3           | 4370  | 4398 |

## BM85

BM85 dMax10 Total No. of Microsatellites found : 56  
Total No. of Compound Microsatellites found : 7

| No. | Compound SSR     | Start | End  |
|-----|------------------|-------|------|
| 1   | (C)6-x5-(T)29    | 766   | 805  |
| 2   | (A)6-x4-(T)6     | 1007  | 1022 |
| 3   | (TA)3-x7-(C)6    | 1583  | 1601 |
| 4   | (AG)3-x5-(AG)3   | 2519  | 2535 |
| 5   | (G)8-x8-(A)6     | 5466  | 5487 |
| 6   | (CA)3-x6-(T)6    | 6524  | 6541 |
| 7   | (CA)3-x4-(AATG)3 | 7048  | 7069 |

BM85 dMax20 Total No. of Microsatellites found : 56  
Total No. of Compound Microsatellites found : 8

| No. | Compound SSR     | Start | End  |
|-----|------------------|-------|------|
| 1   | (C)6-x5-(T)29    | 766   | 805  |
| 2   | (A)6-x4-(T)6     | 1007  | 1022 |
| 3   | (TA)3-x7-(C)6    | 1583  | 1601 |
| 4   | (AG)3-x5-(AG)3   | 2519  | 2535 |
| 5   | (A)6-x14-(G)6    | 3358  | 3383 |
| 6   | (G)8-x8-(A)6     | 5466  | 5487 |
| 7   | (CA)3-x6-(T)6    | 6524  | 6541 |
| 8   | (CA)3-x4-(AATG)3 | 7048  | 7069 |

BM85 dMax30 Total No. of Microsatellites found : 56  
Total No. of Compound Microsatellites found : 10

| No. | Compound SSR    | Start | End  |
|-----|-----------------|-------|------|
| 1   | (T)6-x24-(A)7   | 146   | 182  |
| 2   | (C)6-x5-(T)29   | 766   | 805  |
| 3   | (A)6-x4-(T)6    | 1007  | 1022 |
| 4   | (TA)3-x7-(C)6   | 1583  | 1601 |
| 5   | (AG)3-x5-(AG)3  | 2519  | 2535 |
| 6   | (A)6-x14-(G)6   | 3358  | 3383 |
| 7   | (AT)4-x29-(AT)8 | 4737  | 4788 |

|                     |      |      |
|---------------------|------|------|
| 8 (G)8-x8-(A)6      | 5466 | 5487 |
| 9 (CA)3-x6-(T)6     | 6524 | 6541 |
| 10 (CA)3-x4-(AATG)3 | 7048 | 7069 |

BM85 dMax40 Total No. of Microsatellites found : 56  
Total No. of Compound Microsatellites found : 12

| No. | Compound SSR            | Start | End  |
|-----|-------------------------|-------|------|
| 1   | (T)6-x24-(A)7           | 146   | 182  |
| 2   | (C)6-x5-(T)29           | 766   | 805  |
| 3   | (A)6-x4-(T)6            | 1007  | 1022 |
| 4   | (A)6-x38-(TA)3-x7-(C)6  | 1539  | 1601 |
| 5   | (AG)3-x5-(AG)3          | 2519  | 2535 |
| 6   | (A)6-x14-(G)6           | 3358  | 3383 |
| 7   | (AT)4-x29-(AT)8         | 4737  | 4788 |
| 8   | (A)6-x38-(T)7           | 4919  | 4969 |
| 9   | (G)8-x8-(A)6            | 5466  | 5487 |
| 10  | (G)6-x30-(CT)3          | 5985  | 6026 |
| 11  | (TC)3-x37-(CA)3-x6-(T)6 | 6481  | 6541 |
| 12  | (CA)3-x4-(AATG)3        | 7048  | 7069 |

BM85 dMax50 Total No. of Microsatellites found : 56  
Total No. of Compound Microsatellites found : 15

| No. | Compound SSR                 | Start | End  |
|-----|------------------------------|-------|------|
| 1   | (T)6-x24-(A)7                | 146   | 182  |
| 2   | (C)6-x5-(T)29                | 766   | 805  |
| 3   | (A)6-x4-(T)6                 | 1007  | 1022 |
| 4   | (A)6-x40-(T)12               | 1160  | 1217 |
| 5   | (A)6-x38-(TA)3-x7-(C)6       | 1539  | 1601 |
| 6   | (AG)3-x43-(CAA)4             | 2227  | 2287 |
| 7   | (AG)3-x5-(AG)3               | 2519  | 2535 |
| 8   | (TC)3-x40-(C)7               | 3220  | 3272 |
| 9   | (A)6-x14-(G)6                | 3358  | 3383 |
| 10  | (AT)4-x29-(AT)8              | 4737  | 4788 |
| 11  | (A)7-x46-(A)6-x38-(T)7       | 4866  | 4969 |
| 12  | (G)8-x8-(A)6                 | 5466  | 5487 |
| 13  | (G)6-x30-(CT)3               | 5985  | 6026 |
| 14  | (TC)3-x37-(CA)3-x6-(T)6      | 6481  | 6541 |
| 15  | (GTCC)3-x45-(CA)3-x4-(AATG)3 | 6992  | 7069 |

## BM86

BM86 dMax10 Total No. of Microsatellites found : 27  
Total No. of Compound Microsatellites found : 3

| No. | Compound SSR     | Start | End  |
|-----|------------------|-------|------|
| 1   | (A)7-x1-(TA)4    | 47    | 62   |
| 2   | (CA)3-x0-(AATT)3 | 3470  | 3486 |
| 3   | (CTT)4-x-2-(T)8  | 4399  | 4415 |

BM86 dMax20 Total No. of Microsatellites found : 27  
Total No. of Compound Microsatellites found : 3

| No. | Compound SSR     | Start | End  |
|-----|------------------|-------|------|
| 1   | (A)7-x1-(TA)4    | 47    | 62   |
| 2   | (CA)3-x0-(AATT)3 | 3470  | 3486 |
| 3   | (CTT)4-x-2-(T)8  | 4399  | 4415 |

BM86 dMax30 Total No. of Microsatellites found : 27  
Total No. of Compound Microsatellites found : 3

| No. | Compound SSR     | Start | End  |
|-----|------------------|-------|------|
| 1   | (A)7-x1-(TA)4    | 47    | 62   |
| 2   | (CA)3-x0-(AATT)3 | 3470  | 3486 |
| 3   | (CTT)4-x-2-(T)8  | 4399  | 4415 |

BM86 dMax40 Total No. of Microsatellites found : 27  
Total No. of Compound Microsatellites found : 4

| No. | Compound SSR              | Start | End  |
|-----|---------------------------|-------|------|
| 1   | (A)7-x1-(TA)4             | 47    | 62   |
| 2   | (TTA)4-x31-(T)7-x30-(TA)3 | 3202  | 3287 |
| 3   | (CA)3-x0-(AATT)3          | 3470  | 3486 |
| 4   | (CTT)4-x-2-(T)8           | 4399  | 4415 |

BM86 dMax50 Total No. of Microsatellites found : 27  
Total No. of Compound Microsatellites found : 5

| No. | Compound SSR              | Start | End  |
|-----|---------------------------|-------|------|
| 1   | (A)7-x1-(TA)4             | 47    | 62   |
| 2   | (AT)3-x42-(AC)4           | 2923  | 2978 |
| 3   | (TTA)4-x31-(T)7-x30-(TA)3 | 3202  | 3287 |
| 4   | (CA)3-x0-(AATT)3          | 3470  | 3486 |
| 5   | (CTT)4-x-2-(T)8           | 4399  | 4415 |

## BM87

BM87 dMax10 Total No. of Microsatellites found : 21  
Total No. of Compound Microsatellites found : 2

| No. | Compound SSR           | Start | End  |
|-----|------------------------|-------|------|
| 1   | (GC)3-x9-(AT)3-x2-(A)6 | 40    | 68   |
| 2   | (GAA)3-x7-(CAT)6       | 3700  | 3733 |

BM87 dMax20 Total No. of Microsatellites found : 21  
Total No. of Compound Microsatellites found : 3

| No. | Compound SSR           | Start | End  |
|-----|------------------------|-------|------|
| 1   | (GC)3-x9-(AT)3-x2-(A)6 | 40    | 68   |
| 2   | (T)8-x19-(T)6          | 2413  | 2445 |
| 3   | (GAA)3-x7-(CAT)6       | 3700  | 3733 |

BM87 dMax30 Total No. of Microsatellites found : 21  
Total No. of Compound Microsatellites found : 3

| No. | Compound SSR                      | Start | End  |
|-----|-----------------------------------|-------|------|
| 1   | (CCT)3-x20-(GC)3-x9-(AT)3-x2-(A)6 | 10    | 68   |
| 2   | (T)8-x19-(T)6                     | 2413  | 2445 |
| 3   | (GAA)3-x7-(CAT)6                  | 3700  | 3733 |

BM87 dMax40 Total No. of Microsatellites found : 21  
Total No. of Compound Microsatellites found : 4

| No. | Compound SSR                      | Start | End |
|-----|-----------------------------------|-------|-----|
| 1   | (CCT)3-x20-(GC)3-x9-(AT)3-x2-(A)6 | 10    | 68  |

|                    |      |      |
|--------------------|------|------|
| 2 (A)7-x35-(GAA)4  | 897  | 951  |
| 3 (T)8-x19-(T)6    | 2413 | 2445 |
| 4 (GAA)3-x7-(CAT)6 | 3700 | 3733 |

BM87 dMax50 Total No. of Microsatellites found : 21  
Total No. of Compound Microsatellites found : 4

| No. | Compound SSR                      | Start | End  |
|-----|-----------------------------------|-------|------|
| 1   | (CCT)3-x20-(GC)3-x9-(AT)3-x2-(A)6 | 10    | 68   |
| 2   | (A)7-x35-(GAA)4                   | 897   | 951  |
| 3   | (T)8-x19-(T)6                     | 2413  | 2445 |
| 4   | (GAA)3-x7-(CAT)6                  | 3700  | 3733 |

## BM88

BM88 dMax10 Total No. of Microsatellites found : 39  
Total No. of Compound Microsatellites found : 1

| No. | Compound SSR  | Start | End  |
|-----|---------------|-------|------|
| 1   | (T)9-x3-(T)10 | 3851  | 3872 |

BM88 dMax20 Total No. of Microsatellites found : 39  
Total No. of Compound Microsatellites found : 4

| No. | Compound SSR                       | Start | End  |
|-----|------------------------------------|-------|------|
| 1   | (T)12-x13-(T)14                    | 325   | 363  |
| 2   | (T)7-x13-(T)10-x13-(T)10-x14-(T)11 | 561   | 638  |
| 3   | (T)6-x15-(A)6                      | 3642  | 3668 |
| 4   | (T)9-x3-(T)10                      | 3851  | 3872 |

BM88 dMax30 Total No. of Microsatellites found : 39  
Total No. of Compound Microsatellites found : 5

| No. | Compound SSR                       | Start | End  |
|-----|------------------------------------|-------|------|
| 1   | (T)12-x13-(T)14                    | 325   | 363  |
| 2   | (T)7-x13-(T)10-x13-(T)10-x14-(T)11 | 561   | 638  |
| 3   | (T)6-x15-(A)6-x23-(A)6             | 3642  | 3697 |
| 4   | (A)17-x21-(T)9-x3-(T)10            | 3813  | 3872 |
| 5   | (AG)3-x28-(GC)3                    | 5445  | 5484 |

BM88 dMax40 Total No. of Microsatellites found : 39  
Total No. of Compound Microsatellites found : 5

| No. | Compound SSR                        | Start | End  |
|-----|-------------------------------------|-------|------|
| 1   | (T)10-x35-(T)12-x13-(T)14-x35-(T)12 | 280   | 410  |
| 2   | (T)7-x13-(T)10-x13-(T)10-x14-(T)11  | 561   | 638  |
| 3   | (T)6-x15-(A)6-x23-(A)6              | 3642  | 3697 |
| 4   | (A)17-x21-(T)9-x3-(T)10             | 3813  | 3872 |
| 5   | (AG)3-x28-(GC)3                     | 5445  | 5484 |

BM88 dMax50 Total No. of Microsatellites found : 39  
Total No. of Compound Microsatellites found : 8

| No. | Compound SSR                        | Start | End |
|-----|-------------------------------------|-------|-----|
| 1   | (TA)3-x46-(A)6                      | 45    | 102 |
| 2   | (T)10-x35-(T)12-x13-(T)14-x35-(T)12 | 280   | 410 |
| 3   | (T)7-x13-(T)10-x13-(T)10-x14-(T)11  | 561   | 638 |
| 4   | (TC)3-x42-(T)6-x41-(ATGT)3          | 730   | 835 |

|                            |      |      |
|----------------------------|------|------|
| 5 (CA)3-x44-(A)6-x40-(AG)6 | 1906 | 2012 |
| 6 (T)6-x15-(A)6-x23-(A)6   | 3642 | 3697 |
| 7 (A)17-x21-(T)9-x3-(T)10  | 3813 | 3872 |
| 8 (AG)3-x28-(GC)3          | 5445 | 5484 |

## BM89

BM89 dMax10 Total No. of Microsatellites found : 34  
Total No. of Compound Microsatellites found : 2

| No. | Compound SSR   | Start | End  |
|-----|----------------|-------|------|
| 1   | (T)13-x4-(A)13 | 401   | 430  |
| 2   | (T)7-x9-(T)6   | 2922  | 2943 |

BM89 dMax20 Total No. of Microsatellites found : 34  
Total No. of Compound Microsatellites found : 5

RESULTS: 1 - 5

| No. | Compound SSR              | Start | End  |
|-----|---------------------------|-------|------|
| 1   | (AAC)3-x14-(T)13-x4-(A)13 | 378   | 430  |
| 2   | (A)7-x14-(T)6             | 1429  | 1455 |
| 3   | (T)7-x9-(T)6              | 2922  | 2943 |
| 4   | (T)7-x10-(TCA)3           | 3216  | 3242 |
| 5   | (G)8-x15-(TCC)4           | 4229  | 4263 |

BM89 dMax30 Total No. of Microsatellites found : 34  
Total No. of Compound Microsatellites found : 6

| No. | Compound SSR               | Start | End  |
|-----|----------------------------|-------|------|
| 1   | (CAGTG)3-x27-(A)6-x21-(T)7 | 11    | 86   |
| 2   | (AAC)3-x14-(T)13-x4-(A)13  | 378   | 430  |
| 3   | (A)7-x14-(T)6              | 1429  | 1455 |
| 4   | (T)7-x9-(T)6               | 2922  | 2943 |
| 5   | (T)7-x10-(TCA)3            | 3216  | 3242 |
| 6   | (G)8-x15-(TCC)4            | 4229  | 4263 |

BM89 dMax40 Total No. of Microsatellites found : 34  
Total No. of Compound Microsatellites found : 6

| No. | Compound SSR               | Start | End  |
|-----|----------------------------|-------|------|
| 1   | (CAGTG)3-x27-(A)6-x21-(T)7 | 11    | 86   |
| 2   | (AAC)3-x14-(T)13-x4-(A)13  | 378   | 430  |
| 3   | (A)7-x14-(T)6              | 1429  | 1455 |
| 4   | (T)7-x9-(T)6               | 2922  | 2943 |
| 5   | (T)7-x10-(TCA)3            | 3216  | 3242 |
| 6   | (G)7-x35-(G)8-x15-(TCC)4   | 4187  | 4263 |

BM89 dMax50 Total No. of Microsatellites found : 34  
Total No. of Compound Microsatellites found : 6

| No. | Compound SSR                         | Start | End  |
|-----|--------------------------------------|-------|------|
| 1   | (CAGTG)3-x27-(A)6-x21-(T)7-x42-(A)10 | 11    | 138  |
| 2   | (AAC)3-x14-(T)13-x4-(A)13            | 378   | 430  |
| 3   | (A)7-x14-(T)6                        | 1429  | 1455 |
| 4   | (G)6-x47-(T)7-x9-(T)6                | 2869  | 2943 |
| 5   | (T)7-x10-(TCA)3                      | 3216  | 3242 |
| 6   | (G)7-x35-(G)8-x15-(TCC)4             | 4187  | 4263 |

## BM90

BM90 dMax10 Total No. of Microsatellites found : 32  
Total No. of Compound Microsatellites found : 2

| No. | Compound SSR            | Start | End  |
|-----|-------------------------|-------|------|
| 1   | (T)10-x4-(A)9-x0-(GAA)4 | 404   | 438  |
| 2   | (TC)3-x4-(AGA)4         | 994   | 1015 |

BM90 dMax20 Total No. of Microsatellites found : 32  
Total No. of Compound Microsatellites found : 5

| No. | Compound SSR                       | Start | End  |
|-----|------------------------------------|-------|------|
| 1   | (AAC)4-x13-(T)10-x4-(A)9-x0-(GAA)4 | 379   | 438  |
| 2   | (TC)3-x4-(AGA)4                    | 994   | 1015 |
| 3   | (A)7-x14-(T)6                      | 1421  | 1447 |
| 4   | (TC)3-x12-(CT)3                    | 3362  | 3385 |
| 5   | (G)8-x15-(TCC)4                    | 4221  | 4255 |

BM90 dMax30 Total No. of Microsatellites found : 32  
Total No. of Compound Microsatellites found : 6

| No. | Compound SSR                       | Start | End  |
|-----|------------------------------------|-------|------|
| 1   | (A)6-x21-(T)7                      | 32    | 65   |
| 2   | (AAC)4-x13-(T)10-x4-(A)9-x0-(GAA)4 | 379   | 438  |
| 3   | (TC)3-x4-(AGA)4                    | 994   | 1015 |
| 4   | (A)7-x14-(T)6                      | 1421  | 1447 |
| 5   | (TC)3-x12-(CT)3                    | 3362  | 3385 |
| 6   | (G)8-x15-(TCC)4                    | 4221  | 4255 |

BM90 dMax40 Total No. of Microsatellites found : 32  
Total No. of Compound Microsatellites found : 6

| No. | Compound SSR                       | Start | End  |
|-----|------------------------------------|-------|------|
| 1   | (A)6-x21-(T)7                      | 32    | 65   |
| 2   | (AAC)4-x13-(T)10-x4-(A)9-x0-(GAA)4 | 379   | 438  |
| 3   | (CT)3-x36-(TC)3-x4-(AGA)4          | 952   | 1015 |
| 4   | (A)7-x14-(T)6                      | 1421  | 1447 |
| 5   | (TC)3-x12-(CT)3                    | 3362  | 3385 |
| 6   | (G)7-x35-(G)8-x15-(TCC)4           | 4179  | 4255 |

BM90 dMax50 Total No. of Microsatellites found : 32  
Total No. of Compound Microsatellites found : 6

| No. | Compound SSR                       | Start | End  |
|-----|------------------------------------|-------|------|
| 1   | (A)6-x21-(T)7-x42-(A)11            | 32    | 118  |
| 2   | (AAC)4-x13-(T)10-x4-(A)9-x0-(GAA)4 | 379   | 438  |
| 3   | (CT)3-x36-(TC)3-x4-(AGA)4          | 952   | 1015 |
| 4   | (A)7-x14-(T)6                      | 1421  | 1447 |
| 5   | (TC)3-x12-(CT)3                    | 3362  | 3385 |
| 6   | (G)7-x35-(G)8-x15-(TCC)4           | 4179  | 4255 |

## BM91

BM91 dMax10 Total No. of Microsatellites found : 29  
Total No. of Compound Microsatellites found : 3

| No. | Compound SSR    | Start | End  |
|-----|-----------------|-------|------|
| 1   | (T)6-x8-(A)13   | 412   | 438  |
| 2   | (AATT)3-x2-(G)6 | 1536  | 1554 |
| 3   | (G)6-x0-(TAA)3  | 2869  | 2884 |

BM91 dMax20 Total No. of Microsatellites found : 29  
Total No. of Compound Microsatellites found : 4

| No. | Compound SSR  | Start | End |
|-----|---------------|-------|-----|
| 1   | (T)6-x8-(A)13 | 412   | 438 |

|                   |      |      |
|-------------------|------|------|
| 2 (A)7-x14-(T)6   | 1434 | 1460 |
| 3 (AATT)3-x2-(G)6 | 1536 | 1554 |
| 4 (G)6-x0-(TAA)3  | 2869 | 2884 |

BM91 dMax30 Total No. of Microsatellites found : 29  
Total No. of Compound Microsatellites found : 6

RESULTS: 1 - 6

| No. | Compound SSR     | Start | End  |
|-----|------------------|-------|------|
| 1   | (TG)5-x29-(T)7   | 32    | 77   |
| 2   | (T)6-x8-(A)13    | 412   | 438  |
| 3   | (A)7-x14-(T)6    | 1434  | 1460 |
| 4   | (AATT)3-x2-(G)6  | 1536  | 1554 |
| 5   | (G)6-x0-(TAA)3   | 2869  | 2884 |
| 6   | (TC)3-x23-(GGA)4 | 4337  | 4377 |

BM91 dMax40 Total No. of Microsatellites found : 29  
Total No. of Compound Microsatellites found : 7

| No. | Compound SSR                | Start | End  |
|-----|-----------------------------|-------|------|
| 1   | (TG)5-x29-(T)7              | 32    | 77   |
| 2   | (T)6-x8-(A)13               | 412   | 438  |
| 3   | (A)7-x14-(T)6               | 1434  | 1460 |
| 4   | (AATT)3-x2-(G)6             | 1536  | 1554 |
| 5   | (G)6-x0-(TAA)3              | 2869  | 2884 |
| 6   | (TGC)3-x38-(AT)3            | 3160  | 3212 |
| 7   | (TC)3-x23-(GGA)4-x38-(AGA)4 | 4337  | 4427 |

BM91 dMax50 Total No. of Microsatellites found : 29  
Total No. of Compound Microsatellites found : 8

| No. | Compound SSR                | Start | End  |
|-----|-----------------------------|-------|------|
| 1   | (TG)5-x29-(T)7-x42-(A)10    | 32    | 129  |
| 2   | (T)6-x8-(A)13               | 412   | 438  |
| 3   | (A)7-x14-(T)6               | 1434  | 1460 |
| 4   | (AATT)3-x2-(G)6             | 1536  | 1554 |
| 5   | (G)6-x0-(TAA)3              | 2869  | 2884 |
| 6   | (TGC)3-x38-(AT)3            | 3160  | 3212 |
| 7   | (T)7-x42-(TC)4              | 4066  | 4122 |
| 8   | (TC)3-x23-(GGA)4-x38-(AGA)4 | 4337  | 4427 |

## BM92

BM92 dMax10 Total No. of Microsatellites found : 26  
Total No. of Compound Microsatellites found : 2

| No. | Compound SSR           | Start | End  |
|-----|------------------------|-------|------|
| 1   | (A)6-x3-(C)7-x4-(AAT)3 | 2323  | 2352 |
| 2   | (T)6-x4-(CT)3          | 4940  | 4955 |

BM92 dMax20 Total No. of Microsatellites found : 26  
Total No. of Compound Microsatellites found : 3

| No. | Compound SSR           | Start | End  |
|-----|------------------------|-------|------|
| 1   | (GC)3-x15-(GC)4        | 246   | 274  |
| 2   | (A)6-x3-(C)7-x4-(AAT)3 | 2323  | 2352 |
| 3   | (T)6-x4-(CT)3          | 4940  | 4955 |

BM92 dMax30 Total No. of Microsatellites found : 26  
Total No. of Compound Microsatellites found : 3

| No. | Compound SSR           | Start | End  |
|-----|------------------------|-------|------|
| 1   | (GC)3-x15-(GC)4        | 246   | 274  |
| 2   | (A)6-x3-(C)7-x4-(AAT)3 | 2323  | 2352 |
| 3   | (T)6-x4-(CT)3          | 4940  | 4955 |

BM92 dMax40 Total No. of Microsatellites found : 26  
Total No. of Compound Microsatellites found : 3

| No. | Compound SSR             | Start | End  |
|-----|--------------------------|-------|------|
| 1   | (GC)3-x15-(GC)4          | 246   | 274  |
| 2   | (A)6-x3-(C)7-x4-(AAT)3   | 2323  | 2352 |
| 3   | (CAT)3-x34-(T)6-x4-(CT)3 | 4897  | 4955 |

BM92 dMax50 Total No. of Microsatellites found : 26  
Total No. of Compound Microsatellites found : 4

| No. | Compound SSR             | Start | End  |
|-----|--------------------------|-------|------|
| 1   | (GC)3-x15-(GC)4          | 246   | 274  |
| 2   | (GT)3-x49-(G)7           | 1226  | 1287 |
| 3   | (A)6-x3-(C)7-x4-(AAT)3   | 2323  | 2352 |
| 4   | (CAT)3-x34-(T)6-x4-(CT)3 | 4897  | 4955 |

### BM93

BM93 dMax10 Total No. of Microsatellites found : 23  
Total No. of Compound Microsatellites found : 2

| No. | Compound SSR    | Start | End  |
|-----|-----------------|-------|------|
| 1   | (CCT)3-x-1-(T)7 | 55    | 70   |
| 2   | (A)7-x4-(A)6    | 4188  | 4204 |

BM93 dMax20 Total No. of Microsatellites found : 23  
Total No. of Compound Microsatellites found : 2

| No. | Compound SSR            | Start | End  |
|-----|-------------------------|-------|------|
| 1   | (CCT)3-x-1-(T)7         | 55    | 70   |
| 2   | (TTA)4-x13-(A)7-x4-(A)6 | 4163  | 4204 |

BM93 dMax30 Total No. of Microsatellites found : 23  
Total No. of Compound Microsatellites found : 2

| No. | Compound SSR            | Start | End  |
|-----|-------------------------|-------|------|
| 1   | (CCT)3-x-1-(T)7         | 55    | 70   |
| 2   | (TTA)4-x13-(A)7-x4-(A)6 | 4163  | 4204 |

BM93 dMax40 Total No. of Microsatellites found : 23  
Total No. of Compound Microsatellites found : 2

| No. | Compound SSR            | Start | End  |
|-----|-------------------------|-------|------|
| 1   | (CCT)3-x-1-(T)7         | 55    | 70   |
| 2   | (TTA)4-x13-(A)7-x4-(A)6 | 4163  | 4204 |

BM93 dMax50 Total No. of Microsatellites found : 23  
Total No. of Compound Microsatellites found : 4

| No. | Compound SSR             | Start | End  |
|-----|--------------------------|-------|------|
| 1   | (CCT)3-x-1-(T)7-x43-(A)9 | 55    | 122  |
| 2   | (TTA)4-x13-(A)7-x4-(A)6  | 4163  | 4204 |
| 3   | (TC)3-x40-(AT)3          | 4463  | 4514 |
| 4   | (AG)3-x47-(T)6           | 4580  | 4638 |

**BM94**

BM94 dMax10 Total No. of Microsatellites found : 26  
Total No. of Compound Microsatellites found : 1

| No. | Compound SSR    | Start | End |
|-----|-----------------|-------|-----|
| 1   | (CCT)3-x-1-(T)7 | 56    | 71  |

BM94 dMax20 Total No. of Microsatellites found : 26  
Total No. of Compound Microsatellites found : 1

| No. | Compound SSR    | Start | End |
|-----|-----------------|-------|-----|
| 1   | (CCT)3-x-1-(T)7 | 56    | 71  |

BM94 dMax30 Total No. of Microsatellites found : 26  
Total No. of Compound Microsatellites found : 2

| No. | Compound SSR     | Start | End  |
|-----|------------------|-------|------|
| 1   | (CCT)3-x-1-(T)7  | 56    | 71   |
| 2   | (AT)3-x22-(ACC)4 | 2266  | 2304 |

BM94 dMax40 Total No. of Microsatellites found : 26  
Total No. of Compound Microsatellites found : 4

| No. | Compound SSR     | Start | End  |
|-----|------------------|-------|------|
| 1   | (CCT)3-x-1-(T)7  | 56    | 71   |
| 2   | (A)10-x31-(GTT)3 | 115   | 165  |
| 3   | (AT)3-x22-(ACC)4 | 2266  | 2304 |
| 4   | (TC)3-x38-(T)6   | 2761  | 2810 |

BM94 dMax50 Total No. of Microsatellites found : 26  
Total No. of Compound Microsatellites found : 4

| No. | Compound SSR                         | Start | End  |
|-----|--------------------------------------|-------|------|
| 1   | (CCT)3-x-1-(T)7-x43-(A)10-x31-(GTT)3 | 56    | 165  |
| 2   | (GA)3-x40-(GAG)3                     | 1208  | 1262 |
| 3   | (AT)3-x22-(ACC)4                     | 2266  | 2304 |
| 4   | (TC)3-x38-(T)6                       | 2761  | 2810 |

**BM95**

BM95 dMax10 Total No. of Microsatellites found : 37  
Total No. of Compound Microsatellites found : 6

| No. | Compound SSR                                 | Start | End  |
|-----|----------------------------------------------|-------|------|
| 1   | (AT)3-x3-(A)8                                | 75    | 91   |
| 2   | (T)8-x4-(G)6                                 | 1910  | 1927 |
| 3   | (T)6-x-2-(TTGCTC)5-x-24-(TTGCTC)9-x-6-(TTC)3 | 2736  | 2806 |
| 4   | (T)7-x9-(T)8                                 | 3166  | 3189 |
| 5   | (T)9-x1-(T)6                                 | 4322  | 4337 |
| 6   | (CA)3-x9-(TGCA)3                             | 4734  | 4759 |

BM95 dMax20 Total No. of Microsatellites found : 37  
Total No. of Compound Microsatellites found : 7

| No. | Compound SSR     | Start | End  |
|-----|------------------|-------|------|
| 1   | (AT)3-x3-(A)8    | 75    | 91   |
| 2   | (AGT)4-x15-(GT)3 | 592   | 623  |
| 3   | (T)8-x4-(G)6     | 1910  | 1927 |

|                                                         |      |      |
|---------------------------------------------------------|------|------|
| 4 (T)6-x-2-(TTGCTC)5-x-24-(TTGCTC)9-x-6-(TTC)3-x16-(T)6 | 2736 | 2828 |
| 5 (T)7-x9-(T)8                                          | 3166 | 3189 |
| 6 (CT)3-x15-(T)9-x1-(T)6                                | 4301 | 4337 |
| 7 (CA)3-x9-(TGCA)3                                      | 4734 | 4759 |

BM95 dMax30 Total No. of Microsatellites found : 37  
Total No. of Compound Microsatellites found : 8

| No. | Compound SSR                                          | Start | End  |
|-----|-------------------------------------------------------|-------|------|
| 1   | (AT)3-x3-(A)8                                         | 75    | 91   |
| 2   | (G)6-x21-(AGT)4-x15-(GT)3                             | 565   | 623  |
| 3   | (T)8-x4-(G)6                                          | 1910  | 1927 |
| 4   | (T)6-x-2-(TTGCTC)5-x-24-(TTGCTC)9-x-6-(TTC)3-x16-(T)6 | 2736  | 2828 |
| 5   | (T)7-x9-(T)8                                          | 3166  | 3189 |
| 6   | (TA)5-x26-(T)7                                        | 4144  | 4186 |
| 7   | (CT)3-x15-(T)9-x1-(T)6                                | 4301  | 4337 |
| 8   | (CA)3-x9-(TGCA)3                                      | 4734  | 4759 |

BM95 dMax40 Total No. of Microsatellites found : 37  
Total No. of Compound Microsatellites found : 9

| No. | Compound SSR                                          | Start | End  |
|-----|-------------------------------------------------------|-------|------|
| 1   | (AT)3-x3-(A)8                                         | 75    | 91   |
| 2   | (G)6-x21-(AGT)4-x15-(GT)3                             | 565   | 623  |
| 3   | (T)8-x4-(G)6                                          | 1910  | 1927 |
| 4   | (T)6-x-2-(TTGCTC)5-x-24-(TTGCTC)9-x-6-(TTC)3-x16-(T)6 | 2736  | 2828 |
| 5   | (T)7-x9-(T)8                                          | 3166  | 3189 |
| 6   | (T)8-x33-(T)7                                         | 3673  | 3720 |
| 7   | (TA)5-x26-(T)7                                        | 4144  | 4186 |
| 8   | (CT)3-x15-(T)9-x1-(T)6                                | 4301  | 4337 |
| 9   | (CA)3-x9-(TGCA)3                                      | 4734  | 4759 |

BM95 dMax50 Total No. of Microsatellites found : 37  
Total No. of Compound Microsatellites found : 9

| No. | Compound SSR                                          | Start | End  |
|-----|-------------------------------------------------------|-------|------|
| 1   | (AT)3-x3-(A)8                                         | 75    | 91   |
| 2   | (G)6-x21-(AGT)4-x15-(GT)3                             | 565   | 623  |
| 3   | (T)8-x4-(G)6                                          | 1910  | 1927 |
| 4   | (T)6-x-2-(TTGCTC)5-x-24-(TTGCTC)9-x-6-(TTC)3-x16-(T)6 | 2736  | 2828 |
| 5   | (T)7-x9-(T)8                                          | 3166  | 3189 |
| 6   | (T)8-x33-(T)7                                         | 3673  | 3720 |
| 7   | (TA)5-x26-(T)7-x46-(A)6                               | 4144  | 4238 |
| 8   | (CT)3-x15-(T)9-x1-(T)6                                | 4301  | 4337 |
| 9   | (CA)3-x9-(TGCA)3                                      | 4734  | 4759 |

## BM96

BM96 dMax10 Total No. of Microsatellites found : 24  
Total No. of Compound Microsatellites found : 2

| No. | Compound SSR  | Start | End  |
|-----|---------------|-------|------|
| 1   | (TA)3-x2-(A)9 | 113   | 129  |
| 2   | (T)6-x9-(T)6  | 3163  | 3183 |

BM96 dMax20 Total No. of Microsatellites found : 24  
Total No. of Compound Microsatellites found : 4

| No. | Compound SSR  | Start | End |
|-----|---------------|-------|-----|
| 1   | (TA)3-x2-(A)9 | 113   | 129 |

|                  |      |      |
|------------------|------|------|
| 2 (T)6-x9-(T)6   | 3163 | 3183 |
| 3 (G)7-x13-(T)6  | 4320 | 4345 |
| 4 (TC)3-x17-(A)7 | 4734 | 4763 |

BM96 dMax30 Total No. of Microsatellites found : 24  
Total No. of Compound Microsatellites found : 4

| No. | Compound SSR   | Start | End  |
|-----|----------------|-------|------|
| 1   | (TA)3-x2-(A)9  | 113   | 129  |
| 2   | (T)6-x9-(T)6   | 3163  | 3183 |
| 3   | (G)7-x13-(T)6  | 4320  | 4345 |
| 4   | (TC)3-x17-(A)7 | 4734  | 4763 |

BM96 dMax40 Total No. of Microsatellites found : 24  
Total No. of Compound Microsatellites found : 4

| No. | Compound SSR           | Start | End  |
|-----|------------------------|-------|------|
| 1   | (T)6-x36-(TA)3-x2-(A)9 | 71    | 129  |
| 2   | (T)6-x9-(T)6           | 3163  | 3183 |
| 3   | (G)7-x13-(T)6          | 4320  | 4345 |
| 4   | (TC)3-x17-(A)7         | 4734  | 4763 |

BM96 dMax50 Total No. of Microsatellites found : 24  
Total No. of Compound Microsatellites found : 4

| No. | Compound SSR           | Start | End  |
|-----|------------------------|-------|------|
| 1   | (T)6-x36-(TA)3-x2-(A)9 | 71    | 129  |
| 2   | (T)6-x9-(T)6           | 3163  | 3183 |
| 3   | (G)7-x13-(T)6          | 4320  | 4345 |
| 4   | (TC)3-x17-(A)7         | 4734  | 4763 |

## BM97

BM97 dMax10 Total No. of Microsatellites found : 38  
Total No. of Compound Microsatellites found : 3

| No. | Compound SSR              | Start | End  |
|-----|---------------------------|-------|------|
| 1   | (A)7-x5-(GC)3             | 75    | 92   |
| 2   | (TCT)4-x2-(G)9-x6-(G)7    | 4228  | 4262 |
| 3   | (CTT)3-x0-(GAG)4-x-1-(G)6 | 4400  | 4425 |

BM97 dMax20 Total No. of Microsatellites found : 38  
Total No. of Compound Microsatellites found : 5

| No. | Compound SSR                                 | Start | End  |
|-----|----------------------------------------------|-------|------|
| 1   | (A)7-x5-(GC)3                                | 75    | 92   |
| 2   | (TG)3-x10-(AC)3                              | 208   | 229  |
| 3   | (TCT)4-x2-(G)9-x6-(G)7-x16-(AGG)4-x12-(AGA)5 | 4228  | 4317 |
| 4   | (CTT)3-x0-(GAG)4-x-1-(G)6                    | 4400  | 4425 |
| 5   | (A)7-x19-(T)6                                | 4860  | 4891 |

BM97 dMax30 Total No. of Microsatellites found : 38  
Total No. of Compound Microsatellites found : 6

| No. | Compound SSR                                 | Start | End  |
|-----|----------------------------------------------|-------|------|
| 1   | (A)7-x5-(GC)3                                | 75    | 92   |
| 2   | (TG)3-x10-(AC)3-x24-(CT)3                    | 208   | 259  |
| 3   | (CA)3-x27-(AT)3                              | 3302  | 3340 |
| 4   | (TCT)4-x2-(G)9-x6-(G)7-x16-(AGG)4-x12-(AGA)5 | 4228  | 4317 |
| 5   | (CTT)3-x0-(GAG)4-x-1-(G)6                    | 4400  | 4425 |
| 6   | (A)7-x19-(T)6                                | 4860  | 4891 |

BM97 dMax40 Total No. of Microsatellites found : 38

Total No. of Compound Microsatellites found : 6

| No. | Compound SSR                                 | Start | End  |
|-----|----------------------------------------------|-------|------|
| 1   | (A)7-x5-(GC)3                                | 75    | 92   |
| 2   | (TG)3-x10-(AC)3-x24-(CT)3                    | 208   | 259  |
| 3   | (CA)3-x27-(AT)3                              | 3302  | 3340 |
| 4   | (TCT)4-x2-(G)9-x6-(G)7-x16-(AGG)4-x12-(AGA)5 | 4228  | 4317 |
| 5   | (CTT)3-x0-(GAG)4-x-1-(G)6                    | 4400  | 4425 |
| 6   | (AAT)4-x31-(A)7-x19-(T)6                     | 4817  | 4891 |

BM97 dMax50 Total No. of Microsatellites found : 38

Total No. of Compound Microsatellites found : 8

| No. | Compound SSR                                 | Start | End  |
|-----|----------------------------------------------|-------|------|
| 1   | (A)7-x5-(GC)3                                | 75    | 92   |
| 2   | (TG)3-x10-(AC)3-x24-(CT)3                    | 208   | 259  |
| 3   | (CT)3-x45-(T)7                               | 528   | 585  |
| 4   | (A)9-x47-(T)6                                | 2589  | 2650 |
| 5   | (CA)3-x27-(AT)3                              | 3302  | 3340 |
| 6   | (TCT)4-x2-(G)9-x6-(G)7-x16-(AGG)4-x12-(AGA)5 | 4228  | 4317 |
| 7   | (CTT)3-x0-(GAG)4-x-1-(G)6                    | 4400  | 4425 |
| 8   | (AAT)4-x31-(A)7-x19-(T)6                     | 4817  | 4891 |

## BM98

BM98 dMax10 Total No. of Microsatellites found : 31

Total No. of Compound Microsatellites found : 3

| No. | Compound SSR    | Start | End  |
|-----|-----------------|-------|------|
| 1   | (T)7-x4-(CTC)4  | 2757  | 2779 |
| 2   | (T)6-x1-(T)7    | 4817  | 4830 |
| 3   | (AGG)3-x4-(TC)3 | 5000  | 5019 |

BM98 dMax20 Total No. of Microsatellites found : 31

Total No. of Compound Microsatellites found : 5

| No. | Compound SSR           | Start | End  |
|-----|------------------------|-------|------|
| 1   | (GA)3-x18-(CAG)4       | 2300  | 2336 |
| 2   | (T)7-x4-(CTC)4         | 2757  | 2779 |
| 3   | (TTG)4-x12-(G)7        | 4350  | 4380 |
| 4   | (CA)3-x13-(T)6-x1-(T)7 | 4798  | 4830 |
| 5   | (AGG)3-x4-(TC)3        | 5000  | 5019 |

BM98 dMax30 Total No. of Microsatellites found : 31

Total No. of Compound Microsatellites found : 5

| No. | Compound SSR           | Start | End  |
|-----|------------------------|-------|------|
| 1   | (GA)3-x18-(CAG)4       | 2300  | 2336 |
| 2   | (T)7-x4-(CTC)4         | 2757  | 2779 |
| 3   | (TTG)4-x12-(G)7        | 4350  | 4380 |
| 4   | (CA)3-x13-(T)6-x1-(T)7 | 4798  | 4830 |
| 5   | (AGG)3-x4-(TC)3        | 5000  | 5019 |

BM98 dMax40 Total No. of Microsatellites found : 31

Total No. of Compound Microsatellites found : 6

| No. | Compound SSR           | Start | End  |
|-----|------------------------|-------|------|
| 1   | (GA)3-x18-(CAG)4       | 2300  | 2336 |
| 2   | (CCT)4-x38-(AG)3       | 2417  | 2472 |
| 3   | (T)7-x4-(CTC)4         | 2757  | 2779 |
| 4   | (TTG)4-x12-(G)7        | 4350  | 4380 |
| 5   | (CA)3-x13-(T)6-x1-(T)7 | 4798  | 4830 |

6 (AGG)3-x4-(TC)3 5000 5019

BM98 dMax50 Total No. of Microsatellites found : 31  
Total No. of Compound Microsatellites found : 6

| No. | Compound SSR           | Start | End  |
|-----|------------------------|-------|------|
| 1   | (GA)3-x18-(CAG)4       | 2300  | 2336 |
| 2   | (CCT)4-x38-(AG)3       | 2417  | 2472 |
| 3   | (T)7-x4-(CTC)4         | 2757  | 2779 |
| 4   | (TTG)4-x12-(G)7        | 4350  | 4380 |
| 5   | (CA)3-x13-(T)6-x1-(T)7 | 4798  | 4830 |
| 6   | (AGG)3-x4-(TC)3        | 5000  | 5019 |

## BM99

BM99 dMax10 Total No. of Microsatellites found : 45  
Total No. of Compound Microsatellites found : 0

BM99 dMax20 Total No. of Microsatellites found : 45  
Total No. of Compound Microsatellites found : 4

| No. | Compound SSR             | Start | End  |
|-----|--------------------------|-------|------|
| 1   | (GT)3-x14-(T)6-x18-(GT)4 | 5     | 56   |
| 2   | (T)10-x14-(T)8           | 968   | 999  |
| 3   | (AGC)4-x11-(AG)3         | 4133  | 4160 |
| 4   | (C)7-x15-(AGC)3          | 4278  | 4308 |

BM99 dMax30 Total No. of Microsatellites found : 45  
Total No. of Compound Microsatellites found : 7

| No. | Compound SSR             | Start | End  |
|-----|--------------------------|-------|------|
| 1   | (GT)3-x14-(T)6-x18-(GT)4 | 5     | 56   |
| 2   | (T)10-x14-(T)8           | 968   | 999  |
| 3   | (AGC)4-x11-(AG)3         | 4133  | 4160 |
| 4   | (C)7-x15-(AGC)3          | 4278  | 4308 |
| 5   | (TC)3-x22-(GTC)4         | 4890  | 4929 |
| 6   | (TG)3-x21-(G)7           | 5006  | 5039 |
| 7   | (GACA)3-x25-(AGC)3       | 6277  | 6321 |

BM99 dMax40 Total No. of Microsatellites found : 45  
Total No. of Compound Microsatellites found : 8

| No. | Compound SSR             | Start | End  |
|-----|--------------------------|-------|------|
| 1   | (GT)3-x14-(T)6-x18-(GT)4 | 5     | 56   |
| 2   | (T)10-x14-(T)8           | 968   | 999  |
| 3   | (AGC)4-x11-(AG)3         | 4133  | 4160 |
| 4   | (C)7-x15-(AGC)3          | 4278  | 4308 |
| 5   | (AT)7-x31-(A)6           | 4656  | 4705 |
| 6   | (TC)3-x22-(GTC)4         | 4890  | 4929 |
| 7   | (TG)3-x21-(G)7           | 5006  | 5039 |
| 8   | (GACA)3-x25-(AGC)3       | 6277  | 6321 |

BM99 dMax50 Total No. of Microsatellites found : 45  
Total No. of Compound Microsatellites found : 10

| No. | Compound SSR             | Start | End  |
|-----|--------------------------|-------|------|
| 1   | (GT)3-x14-(T)6-x18-(GT)4 | 5     | 56   |
| 2   | (T)10-x14-(T)8           | 968   | 999  |
| 3   | (A)9-x48-(AC)3           | 1142  | 1204 |
| 4   | (G)7-x41-(G)6            | 1866  | 1919 |

|                             |      |      |
|-----------------------------|------|------|
| 5 (AGC)4-x11-(AG)3          | 4133 | 4160 |
| 6 (C)7-x15-(AGC)3           | 4278 | 4308 |
| 7 (AT)7-x31-(A)6-x41-(T)7   | 4656 | 4753 |
| 8 (A)8-x46-(TC)3-x22-(GTC)4 | 4836 | 4929 |
| 9 (TG)3-x21-(G)7            | 5006 | 5039 |
| 10 (GACA)3-x25-(AGC)3       | 6277 | 6321 |

## BM100

BM100 dMax10 Total No. of Microsatellites found : 27

Total No. of Compound Microsatellites found : 3

| No. | Compound SSR              | Start | End  |
|-----|---------------------------|-------|------|
| 1   | (A)7-x9-(A)9-x1-(TGACCT)3 | 3264  | 3307 |
| 2   | (T)6-x8-(T)6              | 3337  | 3356 |
| 3   | (CTC)3-x7-(CT)3           | 3607  | 3628 |

BM100 dMax20 Total No. of Microsatellites found : 27

Total No. of Compound Microsatellites found : 4

| No. | Compound SSR              | Start | End  |
|-----|---------------------------|-------|------|
| 1   | (CA)3-x15-(GA)3           | 873   | 899  |
| 2   | (A)7-x9-(A)9-x1-(TGACCT)3 | 3264  | 3307 |
| 3   | (T)6-x8-(T)6              | 3337  | 3356 |
| 4   | (CTC)3-x7-(CT)3           | 3607  | 3628 |

BM100 dMax30 Total No. of Microsatellites found : 27

Total No. of Compound Microsatellites found : 4

| No. | Compound SSR                               | Start | End  |
|-----|--------------------------------------------|-------|------|
| 1   | (CA)3-x15-(GA)3                            | 873   | 899  |
| 2   | (A)7-x9-(A)9-x1-(TGACCT)3-x29-(T)6-x8-(T)6 | 3264  | 3356 |
| 3   | (CTC)3-x7-(CT)3                            | 3607  | 3628 |
| 4   | (CA)3-x28-(AG)3                            | 4345  | 4384 |

BM100 dMax40 Total No. of Microsatellites found : 27

Total No. of Compound Microsatellites found : 6

| No. | Compound SSR                               | Start | End  |
|-----|--------------------------------------------|-------|------|
| 1   | (CA)3-x15-(GA)3                            | 873   | 899  |
| 2   | (GA)5-x39-(AT)3                            | 1214  | 1269 |
| 3   | (A)7-x9-(A)9-x1-(TGACCT)3-x29-(T)6-x8-(T)6 | 3264  | 3356 |
| 4   | (A)6-x38-(A)6                              | 3400  | 3449 |
| 5   | (CTC)3-x7-(CT)3                            | 3607  | 3628 |
| 6   | (CA)3-x28-(AG)3                            | 4345  | 4384 |

BM100 dMax50 Total No. of Microsatellites found : 27

Total No. of Compound Microsatellites found : 5

| No. | Compound SSR                                                 | Start | End  |
|-----|--------------------------------------------------------------|-------|------|
| 1   | (CA)3-x15-(GA)3                                              | 873   | 899  |
| 2   | (GA)5-x39-(AT)3                                              | 1214  | 1269 |
| 3   | (A)7-x9-(A)9-x1-(TGACCT)3-x29-(T)6-x8-(T)6-x43-(A)6-x38-(A)6 | 3264  | 3449 |
| 4   | (CTC)3-x7-(CT)3                                              | 3607  | 3628 |
| 5   | (CA)3-x28-(AG)3                                              | 4345  | 4384 |
